# Supplementary material for: Are anthropometric characteristics powerful markers to predict the Cooper Run Test? Actual Caucasian data
Source: PeerJ. 2023 Apr 21;11:e15271. doi: 10.7717/peerj.15271 (PMC10124560; doi:10.7717/peerj.15271)
Supplement: Supplemental Information 1 [file peerj-11-15271-s001.xlsx]

## Sheet: database generale
ID	Sex	Age (years)	sub	H (cm)	M (kg)	12minRT (m)	bmi	12minRT (m)	Vmedia (km/h)	Vo2max	Vo2max	Vo2max	Mat Offset	AgePHV (years)	PHV (-1,0,+1 years+O23)
A1	F	11	1	148	39	1470	17.805	1470	7.35	21.5713	21.5645	1492.2	-0.833763	11.8338	1
A2	F	11	2	148	41	1560	18.718	1560	7.8	23.5829	23.576	1492.2	-0.833763	11.8338	1				years	M	F	total
A3	F	11	3	156	49	1671	20.1348	1671	8.355	26.0639	26.0569	1672.2	-0.462122	11.4621	0				11	1188	1127	2315
A4	F	11	4	150	40	1755	17.7778	1755	8.775	27.9414	27.9342	1537.2	-0.740853	11.7409	1				12	1435	1435	2811
A5	F	11	5	150	38	1800	16.8889	1800	9	28.9473	28.94	1537.2	-0.740853	11.7409	1				13	1394	1345	2739
A6	F	11	6	132	28.5	1008	16.3567	1008	5.04	11.245	11.2388	1132.2	-1.57705	12.577	2				14	904	708	1612
A7	F	11	7	132	28.5	1008	16.3567	1008	5.04	11.245	11.2388	1132.2	-1.57705	12.577	2
A8	F	11	8	132	28.5	1008	16.3567	1008	5.04	11.245	11.2388	1132.2	-1.57705	12.577	2
A9	F	11	9	151	44.4	1025	19.4728	1025	5.125	11.6249	11.6187	1559.7	-0.694398	11.6944	1			Maturity offset for girls (years) = − 7.709133 + (0.0042232 × (age × height))
A10	F	11	10	165	62.7	1050	23.0303	1050	5.25	12.1837	12.1775	1874.7	-0.044025	11.044	0			Maturity offset for boys (years) = − 7.999994 + (0.0036124 × (age × height))
A11	F	11	11	145	37.5	1056	17.8359	1056	5.28	12.3178	12.3116	1424.7	-0.973129	11.9731	1			(Moore et al, 2015)
A12	F	11	12	150	42	1056	18.6667	1056	5.28	12.3178	12.3116	1537.2	-0.740853	11.7409	1
A13	F	11	13	145	37.5	1056	17.8359	1056	5.28	12.3178	12.3116	1424.7	-0.973129	11.9731	1
A14	F	11	14	150	42	1056	18.6667	1056	5.28	12.3178	12.3116	1537.2	-0.740853	11.7409	1
A15	F	11	15	150	42	1056	18.6667	1056	5.28	12.3178	12.3116	1537.2	-0.740853	11.7409	1
A16	F	11	16	145	37.5	1056	17.8359	1056	5.28	12.3178	12.3116	1424.7	-0.973129	11.9731	1
A17	F	11	17	150	41	1059	18.2222	1059	5.295	12.3849	12.3787	1537.2	-0.740853	11.7409	1
A18	F	11	18	150	41	1059	18.2222	1059	5.295	12.3849	12.3787	1537.2	-0.740853	11.7409	1
A19	F	11	19	150	41	1059	18.2222	1059	5.295	12.3849	12.3787	1537.2	-0.740853	11.7409	1
A20	F	11	20	153	33	1104	14.0971	1104	5.52	13.3907	13.3844	1604.7	-0.601487	11.6015	1
A21	F	11	21	153	33	1104	14.0971	1104	5.52	13.3907	13.3844	1604.7	-0.601487	11.6015	1
A22	F	11	22	151	39	1104	17.1045	1104	5.52	13.3907	13.3844	1559.7	-0.694398	11.6944	1
A23	F	11	23	155	45	1128	18.7305	1128	5.64	13.9271	13.9208	1649.7	-0.508577	11.5086	1
A24	F	11	24	145	35	1134	16.6468	1134	5.67	14.0612	14.0549	1424.7	-0.973129	11.9731	1
A25	F	11	25	149	57.9	1134	26.0799	1134	5.67	14.0612	14.0549	1514.7	-0.787308	11.7873	1
A26	F	11	26	145	35	1134	16.6468	1134	5.67	14.0612	14.0549	1424.7	-0.973129	11.9731	1
A27	F	11	27	149	57.9	1134	26.0799	1134	5.67	14.0612	14.0549	1514.7	-0.787308	11.7873	1
A28	F	11	28	149	51.6	1140	23.2422	1140	5.7	14.1954	14.189	1514.7	-0.787308	11.7873	1
A29	F	11	29	149	51.6	1140	23.2422	1140	5.7	14.1954	14.189	1514.7	-0.787308	11.7873	1
A30	F	11	30	149	51.6	1140	23.2422	1140	5.7	14.1954	14.189	1514.7	-0.787308	11.7873	1
A31	F	11	31	145	48	1140	22.83	1140	5.7	14.1954	14.189	1424.7	-0.973129	11.9731	1
A32	F	11	32	151	60	1172	26.3146	1172	5.86	14.9106	14.9042	1559.7	-0.694398	11.6944	1
A33	F	11	33	151	60	1172	26.3146	1172	5.86	14.9106	14.9042	1559.7	-0.694398	11.6944	1
A34	F	11	34	150	39	1188	17.3333	1188	5.94	15.2682	15.2618	1537.2	-0.740853	11.7409	1
A35	F	11	35	150	39	1188	17.3333	1188	5.94	15.2682	15.2618	1537.2	-0.740853	11.7409	1
A36	F	11	36	150	39	1188	17.3333	1188	5.94	15.2682	15.2618	1537.2	-0.740853	11.7409	1
A37	F	11	37	135	36	1200	19.7531	1200	6	15.5364	15.53	1199.7	-1.43768	12.4377	1
A38	F	11	38	163	53.8	1200	20.2492	1200	6	15.5364	15.53	1829.7	-0.136935	11.1369	0
A39	F	11	39	135	36	1200	19.7531	1200	6	15.5364	15.53	1199.7	-1.43768	12.4377	1
A40	F	11	40	163	53.8	1200	20.2492	1200	6	15.5364	15.53	1829.7	-0.136935	11.1369	0
A41	F	11	41	135	36	1200	19.7531	1200	6	15.5364	15.53	1199.7	-1.43768	12.4377	1
A42	F	11	42	163	53.8	1200	20.2492	1200	6	15.5364	15.53	1829.7	-0.136935	11.1369	0
A43	F	11	43	154	35	1219	14.758	1219	6.095	15.9611	15.9547	1627.2	-0.555032	11.555	1
A44	F	11	44	154	35	1219	14.758	1219	6.095	15.9611	15.9547	1627.2	-0.555032	11.555	1
A45	F	11	45	137	35	1224	18.6478	1224	6.12	16.0729	16.0664	1244.7	-1.34477	12.3448	1
A46	F	11	46	142	31	1224	15.3739	1224	6.12	16.0729	16.0664	1357.2	-1.11249	12.1125	1
A47	F	11	47	137	35	1224	18.6478	1224	6.12	16.0729	16.0664	1244.7	-1.34477	12.3448	1
A48	F	11	48	142	31	1224	15.3739	1224	6.12	16.0729	16.0664	1357.2	-1.11249	12.1125	1
A49	F	11	49	142	31	1224	15.3739	1224	6.12	16.0729	16.0664	1357.2	-1.11249	12.1125	1
A50	F	11	50	137	35	1224	18.6478	1224	6.12	16.0729	16.0664	1244.7	-1.34477	12.3448	1
A51	F	11	51	151.5	60	1254	26.1412	1254	6.27	16.7434	16.7369	1570.95	-0.67117	11.6712	1
A52	F	11	52	142.5	46.7	1260	22.9978	1260	6.3	16.8775	16.871	1368.45	-1.08927	12.0893	1
A53	F	11	53	150	42	1272	18.6667	1272	6.36	17.1457	17.1392	1537.2	-0.740853	11.7409	1
A54	F	11	54	150	42	1272	18.6667	1272	6.36	17.1457	17.1392	1537.2	-0.740853	11.7409	1
A55	F	11	55	150	42	1272	18.6667	1272	6.36	17.1457	17.1392	1537.2	-0.740853	11.7409	1
A56	F	11	56	139	36	1285	18.6326	1285	6.425	17.4363	17.4298	1289.7	-1.25186	12.2519	1
A57	F	11	57	139	36	1285	18.6326	1285	6.425	17.4363	17.4298	1289.7	-1.25186	12.2519	1
A58	F	11	58	139	36	1285	18.6326	1285	6.425	17.4363	17.4298	1289.7	-1.25186	12.2519	1
A59	F	11	59	161	54	1296	20.8325	1296	6.48	17.6822	17.6756	1784.7	-0.229846	11.2298	0
A60	F	11	60	161	54	1296	20.8325	1296	6.48	17.6822	17.6756	1784.7	-0.229846	11.2298	0
A61	F	11	61	150	63	1296	28	1296	6.48	17.6822	17.6756	1537.2	-0.740853	11.7409	1
A62	F	11	62	153	41	1300	17.5146	1300	6.5	17.7716	17.765	1604.7	-0.601487	11.6015	1
A63	F	11	63	153	41	1300	17.5146	1300	6.5	17.7716	17.765	1604.7	-0.601487	11.6015	1
A64	F	11	64	157	44.1	1304	17.8912	1304	6.52	17.861	17.8544	1694.7	-0.415667	11.4157	0
A65	F	11	65	130	32	1322.45	18.9349	1322.45	6.61224	18.2733	18.2667	1087.2	-1.66996	12.67	2
A66	F	11	66	153	49.3	1350	21.0603	1350	6.75	18.8891	18.8825	1604.7	-0.601487	11.6015	1
A67	F	11	67	137	40	1350	21.3117	1350	6.75	18.8891	18.8825	1244.7	-1.34477	12.3448	1
A68	F	11	68	164	49	1350	18.2183	1350	6.75	18.8891	18.8825	1852.2	-0.0904802	11.0905	0
A69	F	11	69	153	49.3	1350	21.0603	1350	6.75	18.8891	18.8825	1604.7	-0.601487	11.6015	1
A70	F	11	70	137	40	1350	21.3117	1350	6.75	18.8891	18.8825	1244.7	-1.34477	12.3448	1
A71	F	11	71	164	49	1350	18.2183	1350	6.75	18.8891	18.8825	1852.2	-0.0904802	11.0905	0
A72	F	11	72	148	32	1350	14.6092	1350	6.75	18.8891	18.8825	1492.2	-0.833763	11.8338	1
A73	F	11	73	164	49	1350	18.2183	1350	6.75	18.8891	18.8825	1852.2	-0.0904802	11.0905	0
A74	F	11	74	137	40	1350	21.3117	1350	6.75	18.8891	18.8825	1244.7	-1.34477	12.3448	1
A75	F	11	75	156	50	1350	20.5457	1350	6.75	18.8891	18.8825	1672.2	-0.462122	11.4621	0
A76	F	11	76	153	49.3	1350	21.0603	1350	6.75	18.8891	18.8825	1604.7	-0.601487	11.6015	1
A77	F	11	77	154.5	43.3	1354	18.1397	1354	6.77	18.9785	18.9719	1638.45	-0.531805	11.5318	1
A78	F	11	78	152	60	1360	25.9695	1360	6.8	19.1127	19.106	1582.2	-0.647943	11.6479	1
A79	F	11	79	157	76.7	1360	31.1169	1360	6.8	19.1127	19.106	1694.7	-0.415667	11.4157	0
A80	F	11	80	150	45	1374	20	1374	6.87	19.4256	19.4189	1537.2	-0.740853	11.7409	1
A81	F	11	81	150	45	1374	20	1374	6.87	19.4256	19.4189	1537.2	-0.740853	11.7409	1
A82	F	11	82	145	42	1376	19.9762	1376	6.88	19.4703	19.4636	1424.7	-0.973129	11.9731	1
A83	F	11	83	157	49	1378.72	19.8791	1378.72	6.89362	19.5311	19.5245	1694.7	-0.415667	11.4157	0
A84	F	11	84	157.5	56.7	1380	22.8571	1380	6.9	19.5597	19.553	1705.95	-0.392439	11.3924	0
A85	F	11	85	150	43.8	1380	19.4667	1380	6.9	19.5597	19.553	1537.2	-0.740853	11.7409	1
A86	F	11	86	147	40	1400	18.5108	1400	7	20.0067	20	1469.7	-0.880219	11.8802	1
A87	F	11	87	145	55	1400	26.1593	1400	7	20.0067	20	1424.7	-0.973129	11.9731	1
A88	F	11	88	147	40	1400	18.5108	1400	7	20.0067	20	1469.7	-0.880219	11.8802	1
A89	F	11	89	145	55	1400	26.1593	1400	7	20.0067	20	1424.7	-0.973129	11.9731	1
A90	F	11	90	147	40	1400	18.5108	1400	7	20.0067	20	1469.7	-0.880219	11.8802	1
A91	F	11	91	153	76	1404	32.2526	1404	7.02	20.0961	20.0894	1604.7	-0.601487	11.6015	1
A92	F	11	92	138	32	1404	16.8032	1404	7.02	20.0961	20.0894	1267.2	-1.29832	12.2983	1
A93	F	11	93	146	44	1404	20.6418	1404	7.02	20.0961	20.0894	1447.2	-0.926674	11.9267	1
A94	F	11	94	156	50	1404	20.5457	1404	7.02	20.0961	20.0894	1672.2	-0.462122	11.4621	0
A95	F	11	95	156	58	1404	23.833	1404	7.02	20.0961	20.0894	1672.2	-0.462122	11.4621	0
A96	F	11	96	166	80.5	1404	29.2132	1404	7.02	20.0961	20.0894	1897.2	0.0024302	10.9976	0
A97	F	11	97	153	76	1404	32.2526	1404	7.02	20.0961	20.0894	1604.7	-0.601487	11.6015	1
A98	F	11	98	138	32	1404	16.8032	1404	7.02	20.0961	20.0894	1267.2	-1.29832	12.2983	1
A99	F	11	99	146	44	1404	20.6418	1404	7.02	20.0961	20.0894	1447.2	-0.926674	11.9267	1
A100	F	11	100	156	50	1404	20.5457	1404	7.02	20.0961	20.0894	1672.2	-0.462122	11.4621	0
A101	F	11	101	156	58	1404	23.833	1404	7.02	20.0961	20.0894	1672.2	-0.462122	11.4621	0
A102	F	11	102	156	50	1404	20.5457	1404	7.02	20.0961	20.0894	1672.2	-0.462122	11.4621	0
A103	F	11	103	147	49	1404	22.6757	1404	7.02	20.0961	20.0894	1469.7	-0.880219	11.8802	1
A104	F	11	104	161	73	1404	28.1625	1404	7.02	20.0961	20.0894	1784.7	-0.229846	11.2298	0
A105	F	11	105	156	58	1404	23.833	1404	7.02	20.0961	20.0894	1672.2	-0.462122	11.4621	0
A106	F	11	106	146	44	1404	20.6418	1404	7.02	20.0961	20.0894	1447.2	-0.926674	11.9267	1
A107	F	11	107	166	80.5	1404	29.2132	1404	7.02	20.0961	20.0894	1897.2	0.0024302	10.9976	0
A108	F	11	108	142	45	1419	22.1682	1419	7.095	20.4314	20.4247	1357.2	-1.11249	12.1125	1
A109	F	11	109	142	45	1419	22.1682	1419	7.095	20.4314	20.4247	1357.2	-1.11249	12.1125	1
A110	F	11	110	151	52	1423	22.806	1423	7.115	20.5208	20.5141	1559.7	-0.694398	11.6944	1
A111	F	11	111	156	48.5	1425	19.9293	1425	7.125	20.5655	20.5588	1672.2	-0.462122	11.4621	0
A112	F	11	112	156	48.5	1425	19.9293	1425	7.125	20.5655	20.5588	1672.2	-0.462122	11.4621	0
A113	F	11	113	156	48.5	1425	19.9293	1425	7.125	20.5655	20.5588	1672.2	-0.462122	11.4621	0
A114	F	11	114	143	53.7	1430	26.2605	1430	7.15	20.6772	20.6705	1379.7	-1.06604	12.066	1
A115	F	11	115	158	50	1433.63	20.0288	1433.63	7.16814	20.7583	20.7516	1717.2	-0.369211	11.3692	0
A116	F	11	116	152	65	1437	28.1337	1437	7.185	20.8337	20.827	1582.2	-0.647943	11.6479	1
A117	F	11	117	153	50	1438	21.3593	1438	7.19	20.8561	20.8493	1604.7	-0.601487	11.6015	1
A118	F	11	118	138	45	1438	23.6295	1438	7.19	20.8561	20.8493	1267.2	-1.29832	12.2983	1
A119	F	11	119	154	40	1439	16.8663	1439	7.195	20.8784	20.8717	1627.2	-0.555032	11.555	1
A120	F	11	120	154	40	1439	16.8663	1439	7.195	20.8784	20.8717	1627.2	-0.555032	11.555	1
A121	F	11	121	154	40	1439	16.8663	1439	7.195	20.8784	20.8717	1627.2	-0.555032	11.555	1
A122	F	11	122	146	36	1440	16.8887	1440	7.2	20.9008	20.894	1447.2	-0.926674	11.9267	1
A123	F	11	123	156	68	1440	27.9421	1440	7.2	20.9008	20.894	1672.2	-0.462122	11.4621	0
A124	F	11	124	151.5	47	1440	20.4773	1440	7.2	20.9008	20.894	1570.95	-0.67117	11.6712	1
A125	F	11	125	150	51	1449	22.6667	1449	7.245	21.1019	21.0952	1537.2	-0.740853	11.7409	1
A126	F	11	126	150	51	1449	22.6667	1449	7.245	21.1019	21.0952	1537.2	-0.740853	11.7409	1
A127	F	11	127	150	51	1449	22.6667	1449	7.245	21.1019	21.0952	1537.2	-0.740853	11.7409	1
A128	F	11	128	151	48.8	1450	21.4026	1450	7.25	21.1243	21.1175	1559.7	-0.694398	11.6944	1
A129	F	11	129	151	48.8	1450	21.4026	1450	7.25	21.1243	21.1175	1559.7	-0.694398	11.6944	1
A130	F	11	130	151	48.8	1450	21.4026	1450	7.25	21.1243	21.1175	1559.7	-0.694398	11.6944	1
A131	F	11	131	165	55	1452	20.202	1452	7.26	21.169	21.1622	1874.7	-0.044025	11.044	0
A132	F	11	132	165	55	1452	20.202	1452	7.26	21.169	21.1622	1874.7	-0.044025	11.044	0
A133	F	11	133	165	55	1452	20.202	1452	7.26	21.169	21.1622	1874.7	-0.044025	11.044	0
A134	F	11	134	143	41	1456	20.0499	1456	7.28	21.2584	21.2516	1379.7	-1.06604	12.066	1
A135	F	11	135	143	41	1456	20.0499	1456	7.28	21.2584	21.2516	1379.7	-1.06604	12.066	1
A136	F	11	136	143	41	1456	20.0499	1456	7.28	21.2584	21.2516	1379.7	-1.06604	12.066	1
A137	F	11	137	146	37	1456.18	17.3579	1456.18	7.2809	21.2624	21.2556	1447.2	-0.926674	11.9267	1
A138	F	11	138	145	42	1469	19.9762	1469	7.345	21.5489	21.5422	1424.7	-0.973129	11.9731	1
A139	F	11	139	145	42	1469	19.9762	1469	7.345	21.5489	21.5422	1424.7	-0.973129	11.9731	1
A140	F	11	140	145	42	1469	19.9762	1469	7.345	21.5489	21.5422	1424.7	-0.973129	11.9731	1
A141	F	11	141	146	36	1470	16.8887	1470	7.35	21.5713	21.5645	1447.2	-0.926674	11.9267	1
A142	F	11	142	146	36	1470	16.8887	1470	7.35	21.5713	21.5645	1447.2	-0.926674	11.9267	1
A143	F	11	143	146	36	1470	16.8887	1470	7.35	21.5713	21.5645	1447.2	-0.926674	11.9267	1
A144	F	11	144	149	53	1470	23.8728	1470	7.35	21.5713	21.5645	1514.7	-0.787308	11.7873	1
A145	F	11	145	147	37.7	1471	17.4464	1471	7.355	21.5937	21.5869	1469.7	-0.880219	11.8802	1
A146	F	11	146	147	37.7	1471	17.4464	1471	7.355	21.5937	21.5869	1469.7	-0.880219	11.8802	1
A147	F	11	147	147	37.7	1471	17.4464	1471	7.355	21.5937	21.5869	1469.7	-0.880219	11.8802	1
A148	F	11	148	145	58	1473	27.5862	1473	7.365	21.6384	21.6316	1424.7	-0.973129	11.9731	1
A149	F	11	149	145	58	1473	27.5862	1473	7.365	21.6384	21.6316	1424.7	-0.973129	11.9731	1
A150	F	11	150	156	48	1480	19.7239	1480	7.4	21.7948	21.788	1672.2	-0.462122	11.4621	0
A151	F	11	151	156	48	1480	19.7239	1480	7.4	21.7948	21.788	1672.2	-0.462122	11.4621	0
A152	F	11	152	156	48	1480	19.7239	1480	7.4	21.7948	21.788	1672.2	-0.462122	11.4621	0
A153	F	11	153	169	43	1489.66	15.0555	1489.66	7.44828	22.0106	22.0038	1964.7	0.141796	10.8582	0
A154	F	11	154	151	53.2	1496	23.3323	1496	7.48	22.1524	22.1456	1559.7	-0.694398	11.6944	1
A155	F	11	155	151	53.2	1496	23.3323	1496	7.48	22.1524	22.1456	1559.7	-0.694398	11.6944	1
A156	F	11	156	151	53.2	1496	23.3323	1496	7.48	22.1524	22.1456	1559.7	-0.694398	11.6944	1
A157	F	11	157	170	79.3	1499	27.4394	1499	7.495	22.2195	22.2127	1987.2	0.188251	10.8117	0
A158	F	11	158	154	55	1500	23.1911	1500	7.5	22.2418	22.235	1627.2	-0.555032	11.555	1
A159	F	11	159	145.5	34.2	1500	16.1547	1500	7.5	22.2418	22.235	1435.95	-0.949901	11.9499	1
A160	F	11	160	151	47	1500	20.6131	1500	7.5	22.2418	22.235	1559.7	-0.694398	11.6944	1
A161	F	11	161	145	49	1502	23.3056	1502	7.51	22.2865	22.2797	1424.7	-0.973129	11.9731	1
A162	F	11	162	145	49	1502	23.3056	1502	7.51	22.2865	22.2797	1424.7	-0.973129	11.9731	1
A163	F	11	163	145	49	1502	23.3056	1502	7.51	22.2865	22.2797	1424.7	-0.973129	11.9731	1
A164	F	11	164	148	44.1	1509	20.1333	1509	7.545	22.443	22.4361	1492.2	-0.833763	11.8338	1
A165	F	11	165	148	44.1	1509	20.1333	1509	7.545	22.443	22.4361	1492.2	-0.833763	11.8338	1
A166	F	11	166	148	44.1	1509	20.1333	1509	7.545	22.443	22.4361	1492.2	-0.833763	11.8338	1
A167	F	11	167	160	57	1510	22.2656	1510	7.55	22.4654	22.4585	1762.2	-0.276301	11.2763	0
A168	F	11	168	150	40	1510	17.7778	1510	7.55	22.4654	22.4585	1537.2	-0.740853	11.7409	1
A169	F	11	169	142	45	1512	22.317	1512	7.56	22.5101	22.5032	1357.2	-1.11249	12.1125	1
A170	F	11	170	142	45	1512	22.317	1512	7.56	22.5101	22.5032	1357.2	-1.11249	12.1125	1
A171	F	11	171	142	45	1512	22.317	1512	7.56	22.5101	22.5032	1357.2	-1.11249	12.1125	1
A172	F	11	172	138	34	1515	17.8534	1515	7.575	22.5771	22.5703	1267.2	-1.29832	12.2983	1
A173	F	11	173	138	34	1515	17.8534	1515	7.575	22.5771	22.5703	1267.2	-1.29832	12.2983	1
A174	F	11	174	163	57.4	1516	21.6041	1516	7.58	22.5995	22.5926	1829.7	-0.136935	11.1369	0
A175	F	11	175	163	57.4	1516	21.6041	1516	7.58	22.5995	22.5926	1829.7	-0.136935	11.1369	0
A176	F	11	176	163	57.4	1516	21.6041	1516	7.58	22.5995	22.5926	1829.7	-0.136935	11.1369	0
A177	F	11	177	156	48.5	1520	19.9293	1520	7.6	22.6889	22.682	1672.2	-0.462122	11.4621	0
A178	F	11	178	159	41	1520	16.2177	1520	7.6	22.6889	22.682	1739.7	-0.322756	11.3228	0
A179	F	11	179	156	48.5	1520	19.9293	1520	7.6	22.6889	22.682	1672.2	-0.462122	11.4621	0
A180	F	11	180	159	41	1520	16.2177	1520	7.6	22.6889	22.682	1739.7	-0.322756	11.3228	0
A181	F	11	181	156	48.5	1520	19.9293	1520	7.6	22.6889	22.682	1672.2	-0.462122	11.4621	0
A182	F	11	182	159	41	1520	16.2177	1520	7.6	22.6889	22.682	1739.7	-0.322756	11.3228	0
A183	F	11	183	158	44	1524.71	17.6254	1524.71	7.62353	22.7941	22.7872	1717.2	-0.369211	11.3692	0
A184	F	11	184	162	73.5	1525	28.0064	1525	7.625	22.8006	22.7938	1807.2	-0.183391	11.1834	0
A185	F	11	185	162	73.5	1525	28.0064	1525	7.625	22.8006	22.7938	1807.2	-0.183391	11.1834	0
A186	F	11	186	156	41	1529	16.8475	1529	7.645	22.89	22.8832	1672.2	-0.462122	11.4621	0
A187	F	11	187	156	41	1529	16.8475	1529	7.645	22.89	22.8832	1672.2	-0.462122	11.4621	0
A188	F	11	188	141	39	1535	19.6167	1535	7.675	23.0241	23.0173	1334.7	-1.15895	12.1589	1
A189	F	11	189	141	39	1535	19.6167	1535	7.675	23.0241	23.0173	1334.7	-1.15895	12.1589	1
A190	F	11	190	141	39	1535	19.6167	1535	7.675	23.0241	23.0173	1334.7	-1.15895	12.1589	1
A191	F	11	191	154	52	1539	22.0526	1539	7.695	23.1135	23.1067	1627.2	-0.555032	11.555	1
A192	F	11	192	155	45	1539	18.7305	1539	7.695	23.1135	23.1067	1649.7	-0.508577	11.5086	1
A193	F	11	193	154	52	1539	22.0526	1539	7.695	23.1135	23.1067	1627.2	-0.555032	11.555	1
A194	F	11	194	155	45	1539	18.7305	1539	7.695	23.1135	23.1067	1649.7	-0.508577	11.5086	1
A195	F	11	195	155	45	1539	18.7305	1539	7.695	23.1135	23.1067	1649.7	-0.508577	11.5086	1
A196	F	11	196	130	30	1540	17.7515	1540	7.7	23.1359	23.129	1087.2	-1.66996	12.67	2
A197	F	11	197	159	43.5	1540	17.2066	1540	7.7	23.1359	23.129	1739.7	-0.322756	11.3228	0
A198	F	11	198	130	30	1540	17.7515	1540	7.7	23.1359	23.129	1087.2	-1.66996	12.67	2
A199	F	11	199	159	43.5	1540	17.2066	1540	7.7	23.1359	23.129	1739.7	-0.322756	11.3228	0
A200	F	11	200	130	30	1540	17.7515	1540	7.7	23.1359	23.129	1087.2	-1.66996	12.67	2
A201	F	11	201	159	43.5	1540	17.2066	1540	7.7	23.1359	23.129	1739.7	-0.322756	11.3228	0
A202	F	11	202	168	55	1540	19.487	1540	7.7	23.1359	23.129	1942.2	0.0953406	10.9047	0
A203	F	11	203	153	38	1542.86	16.2331	1542.86	7.71429	23.1998	23.1929	1604.7	-0.601487	11.6015	1
A204	F	11	204	163	62	1550	23.3355	1550	7.75	23.3594	23.3525	1829.7	-0.136935	11.1369	0
A205	F	11	205	143	43	1553.96	21.0279	1553.96	7.76978	23.4479	23.4409	1379.7	-1.06604	12.066	1
A206	F	11	206	152	51	1556	22.0741	1556	7.78	23.4935	23.4866	1582.2	-0.647943	11.6479	1
A207	F	11	207	152	51	1556	22.0741	1556	7.78	23.4935	23.4866	1582.2	-0.647943	11.6479	1
A208	F	11	208	152	51	1556	22.0741	1556	7.78	23.4935	23.4866	1582.2	-0.647943	11.6479	1
A209	F	11	209	143	38	1557.69	18.5828	1557.69	7.78846	23.5313	23.5244	1379.7	-1.06604	12.066	1
A210	F	11	210	142	38.6	1560	19.143	1560	7.8	23.5829	23.576	1357.2	-1.11249	12.1125	1
A211	F	11	211	147	46.8	1560	21.6576	1560	7.8	23.5829	23.576	1469.7	-0.880219	11.8802	1
A212	F	11	212	150	39.8	1560	17.6889	1560	7.8	23.5829	23.576	1537.2	-0.740853	11.7409	1
A213	F	11	213	142	38.6	1560	19.143	1560	7.8	23.5829	23.576	1357.2	-1.11249	12.1125	1
A214	F	11	214	147	46.8	1560	21.6576	1560	7.8	23.5829	23.576	1469.7	-0.880219	11.8802	1
A215	F	11	215	150	39.8	1560	17.6889	1560	7.8	23.5829	23.576	1537.2	-0.740853	11.7409	1
A216	F	11	216	153.5	65.8	1560	27.926	1560	7.8	23.5829	23.576	1615.95	-0.57826	11.5783	1
A217	F	11	217	144.5	48.2	1560	23.084	1560	7.8	23.5829	23.576	1413.45	-0.996357	11.9964	1
A218	F	11	218	163	67	1560	25.2174	1560	7.8	23.5829	23.576	1829.7	-0.136935	11.1369	0
A219	F	11	219	142	34	1560	16.8617	1560	7.8	23.5829	23.576	1357.2	-1.11249	12.1125	1
A220	F	11	220	142	38.6	1560	19.143	1560	7.8	23.5829	23.576	1357.2	-1.11249	12.1125	1
A221	F	11	221	150	39.8	1560	17.6889	1560	7.8	23.5829	23.576	1537.2	-0.740853	11.7409	1
A222	F	11	222	147	46.8	1560	21.6576	1560	7.8	23.5829	23.576	1469.7	-0.880219	11.8802	1
A223	F	11	223	148	48	1560	21.9138	1560	7.8	23.5829	23.576	1492.2	-0.833763	11.8338	1
A224	F	11	224	160	63.8	1565	24.9219	1565	7.825	23.6947	23.6878	1762.2	-0.276301	11.2763	0
A225	F	11	225	139	50	1565.22	25.8786	1565.22	7.82609	23.6995	23.6926	1289.7	-1.25186	12.2519	1
A226	F	11	226	143	33	1566	16.1377	1566	7.83	23.717	23.7101	1379.7	-1.06604	12.066	1
A227	F	11	227	152	57.3	1568	24.8009	1568	7.84	23.7617	23.7548	1582.2	-0.647943	11.6479	1
A228	F	11	228	153	43.9	1568	18.7535	1568	7.84	23.7617	23.7548	1604.7	-0.601487	11.6015	1
A229	F	11	229	152	57.3	1568	24.8009	1568	7.84	23.7617	23.7548	1582.2	-0.647943	11.6479	1
A230	F	11	230	153	43.9	1568	18.7535	1568	7.84	23.7617	23.7548	1604.7	-0.601487	11.6015	1
A231	F	11	231	152	57.3	1568	24.8009	1568	7.84	23.7617	23.7548	1582.2	-0.647943	11.6479	1
A232	F	11	232	153	43.9	1568	18.7535	1568	7.84	23.7617	23.7548	1604.7	-0.601487	11.6015	1
A233	F	11	233	135	31	1572.82	17.0096	1572.82	7.86408	23.8694	23.8624	1199.7	-1.43768	12.4377	1
A234	F	11	234	146	37	1575	17.3579	1575	7.875	23.9182	23.9113	1447.2	-0.926674	11.9267	1
A235	F	11	235	146	37	1575	17.3579	1575	7.875	23.9182	23.9113	1447.2	-0.926674	11.9267	1
A236	F	11	236	150	45	1575	20	1575	7.875	23.9182	23.9113	1537.2	-0.740853	11.7409	1
A237	F	11	237	149	54	1575	24.3232	1575	7.875	23.9182	23.9113	1514.7	-0.787308	11.7873	1
A238	F	11	238	146	37	1575	17.3579	1575	7.875	23.9182	23.9113	1447.2	-0.926674	11.9267	1
A239	F	11	239	153	40	1576	17.0874	1576	7.88	23.9405	23.9336	1604.7	-0.601487	11.6015	1
A240	F	11	240	153	40	1576	17.0874	1576	7.88	23.9405	23.9336	1604.7	-0.601487	11.6015	1
A241	F	11	241	150	33	1577	14.6667	1577	7.885	23.9629	23.956	1537.2	-0.740853	11.7409	1
A242	F	11	242	150	33	1577	14.6667	1577	7.885	23.9629	23.956	1537.2	-0.740853	11.7409	1
A243	F	11	243	138	39.5	1580	20.7414	1580	7.9	24.03	24.023	1267.2	-1.29832	12.2983	1
A244	F	11	244	151.5	47	1580	20.4773	1580	7.9	24.03	24.023	1570.95	-0.67117	11.6712	1
A245	F	11	245	138	39.5	1580	20.7414	1580	7.9	24.03	24.023	1267.2	-1.29832	12.2983	1
A246	F	11	246	151.5	47	1580	20.4773	1580	7.9	24.03	24.023	1570.95	-0.67117	11.6712	1
A247	F	11	247	138	39.5	1580	20.7414	1580	7.9	24.03	24.023	1267.2	-1.29832	12.2983	1
A248	F	11	248	151.5	47	1580	20.4773	1580	7.9	24.03	24.023	1570.95	-0.67117	11.6712	1
A249	F	11	249	157	49	1580	19.8791	1580	7.9	24.03	24.023	1694.7	-0.415667	11.4157	0
A250	F	11	250	139	46	1581	23.653	1581	7.905	24.0523	24.0453	1289.7	-1.25186	12.2519	1
A251	F	11	251	139	46	1581	23.653	1581	7.905	24.0523	24.0453	1289.7	-1.25186	12.2519	1
A252	F	11	252	153	42.5	1584	18.1554	1584	7.92	24.1194	24.1124	1604.7	-0.601487	11.6015	1
A253	F	11	253	140	37	1584.35	18.8776	1584.35	7.92176	24.1272	24.1203	1312.2	-1.2054	12.2054	1
A254	F	11	254	156	38	1588.24	15.6147	1588.24	7.94118	24.214	24.2071	1672.2	-0.462122	11.4621	0
A255	F	11	255	153	42	1588.24	17.9418	1588.24	7.94118	24.214	24.2071	1604.7	-0.601487	11.6015	1
A256	F	11	256	145	34	1590	16.1712	1590	7.95	24.2535	24.2465	1424.7	-0.973129	11.9731	1
A257	F	11	257	145	34	1590	16.1712	1590	7.95	24.2535	24.2465	1424.7	-0.973129	11.9731	1
A258	F	11	258	145	34	1590	16.1712	1590	7.95	24.2535	24.2465	1424.7	-0.973129	11.9731	1
A259	F	11	259	146	39	1595	18.2961	1595	7.975	24.3652	24.3583	1447.2	-0.926674	11.9267	1
A260	F	11	260	149	38	1600	17.1163	1600	8	24.477	24.47	1514.7	-0.787308	11.7873	1
A261	F	11	261	157	55	1600	22.3133	1600	8	24.477	24.47	1694.7	-0.415667	11.4157	0
A262	F	11	262	139	44.6	1600	23.0837	1600	8	24.477	24.47	1289.7	-1.25186	12.2519	1
A263	F	11	263	142	40.8	1600	20.2341	1600	8	24.477	24.47	1357.2	-1.11249	12.1125	1
A264	F	11	264	147	36.5	1600	16.8911	1600	8	24.477	24.47	1469.7	-0.880219	11.8802	1
A265	F	11	265	149	38	1600	17.1163	1600	8	24.477	24.47	1514.7	-0.787308	11.7873	1
A266	F	11	266	157	55	1600	22.3133	1600	8	24.477	24.47	1694.7	-0.415667	11.4157	0
A267	F	11	267	139	44.6	1600	23.0837	1600	8	24.477	24.47	1289.7	-1.25186	12.2519	1
A268	F	11	268	142	40.8	1600	20.2341	1600	8	24.477	24.47	1357.2	-1.11249	12.1125	1
A269	F	11	269	147	36.5	1600	16.8911	1600	8	24.477	24.47	1469.7	-0.880219	11.8802	1
A270	F	11	270	144	36	1600	17.3611	1600	8	24.477	24.47	1402.2	-1.01958	12.0196	1
A271	F	11	271	137	33	1600	17.5822	1600	8	24.477	24.47	1244.7	-1.34477	12.3448	1
A272	F	11	272	142	40.8	1600	20.2341	1600	8	24.477	24.47	1357.2	-1.11249	12.1125	1
A273	F	11	273	139	44.6	1600	23.0837	1600	8	24.477	24.47	1289.7	-1.25186	12.2519	1
A274	F	11	274	147	36.5	1600	16.8911	1600	8	24.477	24.47	1469.7	-0.880219	11.8802	1
A275	F	11	275	151	36	1603.96	15.7888	1603.96	8.0198	24.5655	24.5585	1559.7	-0.694398	11.6944	1
A276	F	11	276	157	52	1605	21.0962	1605	8.025	24.5887	24.5817	1694.7	-0.415667	11.4157	0
A277	F	11	277	148.5	27.5	1606	12.4704	1606	8.03	24.6111	24.6041	1503.45	-0.810536	11.8105	1
A278	F	11	278	145.5	50.6	1606	23.9015	1606	8.03	24.6111	24.6041	1435.95	-0.949901	11.9499	1
A279	F	11	279	134	28	1610	15.5937	1610	8.05	24.7005	24.6935	1177.2	-1.48414	12.4841	1
A280	F	11	280	138	37.2	1610	19.5337	1610	8.05	24.7005	24.6935	1267.2	-1.29832	12.2983	1
A281	F	11	281	134	28	1610	15.5937	1610	8.05	24.7005	24.6935	1177.2	-1.48414	12.4841	1
A282	F	11	282	138	37.2	1610	19.5337	1610	8.05	24.7005	24.6935	1267.2	-1.29832	12.2983	1
A283	F	11	283	138	37.2	1610	19.5337	1610	8.05	24.7005	24.6935	1267.2	-1.29832	12.2983	1
A284	F	11	284	134	28	1610	15.5937	1610	8.05	24.7005	24.6935	1177.2	-1.48414	12.4841	1
A285	F	11	285	157	45	1610	18.2563	1610	8.05	24.7005	24.6935	1694.7	-0.415667	11.4157	0
A286	F	11	286	166	58.3	1615	21.1569	1615	8.075	24.8122	24.8053	1897.2	0.0024302	10.9976	0
A287	F	11	287	166	58.3	1615	21.1569	1615	8.075	24.8122	24.8053	1897.2	0.0024302	10.9976	0
A288	F	11	288	166	58.3	1615	21.1569	1615	8.075	24.8122	24.8053	1897.2	0.0024302	10.9976	0
A289	F	11	289	137	31	1615.96	16.5166	1615.96	8.0798	24.8337	24.8267	1244.7	-1.34477	12.3448	1
A290	F	11	290	144	38	1620	18.1809	1620	8.1	24.924	24.917	1402.2	-1.01958	12.0196	1
A291	F	11	291	147	38.8	1620	17.9555	1620	8.1	24.924	24.917	1469.7	-0.880219	11.8802	1
A292	F	11	292	138	38	1620	19.9538	1620	8.1	24.924	24.917	1267.2	-1.29832	12.2983	1
A293	F	11	293	140.5	31	1620	15.704	1620	8.1	24.924	24.917	1323.45	-1.18218	12.1822	1
A294	F	11	294	146	44.4	1620	20.8294	1620	8.1	24.924	24.917	1447.2	-0.926674	11.9267	1
A295	F	11	295	149	43	1620	19.3685	1620	8.1	24.924	24.917	1514.7	-0.787308	11.7873	1
A296	F	11	296	156	49.4	1620	20.2991	1620	8.1	24.924	24.917	1672.2	-0.462122	11.4621	0
A297	F	11	297	156	48	1620	19.7239	1620	8.1	24.924	24.917	1672.2	-0.462122	11.4621	0
A298	F	11	298	144	38	1620	18.1809	1620	8.1	24.924	24.917	1402.2	-1.01958	12.0196	1
A299	F	11	299	147	38.8	1620	17.9555	1620	8.1	24.924	24.917	1469.7	-0.880219	11.8802	1
A300	F	11	300	138	38	1620	19.9538	1620	8.1	24.924	24.917	1267.2	-1.29832	12.2983	1
A301	F	11	301	140.5	31	1620	15.704	1620	8.1	24.924	24.917	1323.45	-1.18218	12.1822	1
A302	F	11	302	146	44.4	1620	20.8294	1620	8.1	24.924	24.917	1447.2	-0.926674	11.9267	1
A303	F	11	303	149	43	1620	19.3685	1620	8.1	24.924	24.917	1514.7	-0.787308	11.7873	1
A304	F	11	304	156	49.4	1620	20.2991	1620	8.1	24.924	24.917	1672.2	-0.462122	11.4621	0
A305	F	11	305	156	48	1620	19.7239	1620	8.1	24.924	24.917	1672.2	-0.462122	11.4621	0
A306	F	11	306	149	38	1620	17.1163	1620	8.1	24.924	24.917	1514.7	-0.787308	11.7873	1
A307	F	11	307	148	41	1620	18.718	1620	8.1	24.924	24.917	1492.2	-0.833763	11.8338	1
A308	F	11	308	155	46	1620	19.1467	1620	8.1	24.924	24.917	1649.7	-0.508577	11.5086	1
A309	F	11	309	146	61	1620	28.617	1620	8.1	24.924	24.917	1447.2	-0.926674	11.9267	1
A310	F	11	310	138	38	1620	19.9538	1620	8.1	24.924	24.917	1267.2	-1.29832	12.2983	1
A311	F	11	311	150	43.9	1620	19.5111	1620	8.1	24.924	24.917	1537.2	-0.740853	11.7409	1
A312	F	11	312	156	49.4	1620	20.2991	1620	8.1	24.924	24.917	1672.2	-0.462122	11.4621	0
A313	F	11	313	146	44.4	1620	20.8294	1620	8.1	24.924	24.917	1447.2	-0.926674	11.9267	1
A314	F	11	314	140.5	31	1620	15.704	1620	8.1	24.924	24.917	1323.45	-1.18218	12.1822	1
A315	F	11	315	147	38.8	1620	17.9555	1620	8.1	24.924	24.917	1469.7	-0.880219	11.8802	1
A316	F	11	316	148	37	1624.06	16.8919	1624.06	8.1203	25.0148	25.0077	1492.2	-0.833763	11.8338	1
A317	F	11	317	150	46.9	1629	20.8444	1629	8.145	25.1252	25.1181	1537.2	-0.740853	11.7409	1
A318	F	11	318	158	36	1629	14.4208	1629	8.145	25.1252	25.1181	1717.2	-0.369211	11.3692	0
A319	F	11	319	150	46.9	1629	20.8444	1629	8.145	25.1252	25.1181	1537.2	-0.740853	11.7409	1
A320	F	11	320	150	46.9	1629	20.8444	1629	8.145	25.1252	25.1181	1537.2	-0.740853	11.7409	1
A321	F	11	321	156.5	43.4	1630	17.7199	1630	8.15	25.1475	25.1405	1683.45	-0.438894	11.4389	0
A322	F	11	322	156.5	43.4	1630	17.7199	1630	8.15	25.1475	25.1405	1683.45	-0.438894	11.4389	0
A323	F	11	323	156.5	43.4	1630	17.7199	1630	8.15	25.1475	25.1405	1683.45	-0.438894	11.4389	0
A324	F	11	324	149	38	1632	17.1163	1632	8.16	25.1922	25.1852	1514.7	-0.787308	11.7873	1
A325	F	11	325	149	38	1632	17.1163	1632	8.16	25.1922	25.1852	1514.7	-0.787308	11.7873	1
A326	F	11	326	153	47.2	1634	20.1632	1634	8.17	25.2369	25.2299	1604.7	-0.601487	11.6015	1
A327	F	11	327	153	47.2	1634	20.1632	1634	8.17	25.2369	25.2299	1604.7	-0.601487	11.6015	1
A328	F	11	328	153	47.2	1634	20.1632	1634	8.17	25.2369	25.2299	1604.7	-0.601487	11.6015	1
A329	F	11	329	154	53.5	1635	22.5586	1635	8.175	25.2593	25.2523	1627.2	-0.555032	11.555	1
A330	F	11	330	154	53.5	1635	22.5586	1635	8.175	25.2593	25.2523	1627.2	-0.555032	11.555	1
A331	F	11	331	154	53.5	1635	22.5586	1635	8.175	25.2593	25.2523	1627.2	-0.555032	11.555	1
A332	F	11	332	143	53.2	1635	26.0159	1635	8.175	25.2593	25.2523	1379.7	-1.06604	12.066	1
A333	F	11	333	146	45	1636.36	21.1109	1636.36	8.18182	25.2898	25.2827	1447.2	-0.926674	11.9267	1
A334	F	11	334	157	55.2	1637	22.3944	1637	8.185	25.304	25.297	1694.7	-0.415667	11.4157	0
A335	F	11	335	145	36	1640	17.1225	1640	8.2	25.371	25.364	1424.7	-0.973129	11.9731	1
A336	F	11	336	150	47	1640	20.8889	1640	8.2	25.371	25.364	1537.2	-0.740853	11.7409	1
A337	F	11	337	150.5	32.8	1640	14.4811	1640	8.2	25.371	25.364	1548.45	-0.717625	11.7176	1
A338	F	11	338	145	36	1640	17.1225	1640	8.2	25.371	25.364	1424.7	-0.973129	11.9731	1
A339	F	11	339	150	47	1640	20.8889	1640	8.2	25.371	25.364	1537.2	-0.740853	11.7409	1
A340	F	11	340	150	47	1640	20.8889	1640	8.2	25.371	25.364	1537.2	-0.740853	11.7409	1
A341	F	11	341	150.5	32.8	1640	14.4811	1640	8.2	25.371	25.364	1548.45	-0.717625	11.7176	1
A342	F	11	342	145	36	1640	17.1225	1640	8.2	25.371	25.364	1424.7	-0.973129	11.9731	1
A343	F	11	343	145	31	1640.51	14.7444	1640.51	8.20253	25.3823	25.3753	1424.7	-0.973129	11.9731	1
A344	F	11	344	133	32	1640.51	18.0903	1640.51	8.20253	25.3823	25.3753	1154.7	-1.53059	12.5306	2
A345	F	11	345	148	40	1645	18.2615	1645	8.225	25.4828	25.4758	1492.2	-0.833763	11.8338	1
A346	F	11	346	148	40	1645	18.2615	1645	8.225	25.4828	25.4758	1492.2	-0.833763	11.8338	1
A347	F	11	347	148	40	1645	18.2615	1645	8.225	25.4828	25.4758	1492.2	-0.833763	11.8338	1
A348	F	11	348	138	39	1650	20.4789	1650	8.25	25.5945	25.5875	1267.2	-1.29832	12.2983	1
A349	F	11	349	138	39	1650	20.4789	1650	8.25	25.5945	25.5875	1267.2	-1.29832	12.2983	1
A350	F	11	350	154	52	1650	21.9261	1650	8.25	25.5945	25.5875	1627.2	-0.555032	11.555	1
A351	F	11	351	154	50.9	1650	21.4623	1650	8.25	25.5945	25.5875	1627.2	-0.555032	11.555	1
A352	F	11	352	137	35.8	1652	19.074	1652	8.26	25.6392	25.6322	1244.7	-1.34477	12.3448	1
A353	F	11	353	169	59.1	1652	20.6926	1652	8.26	25.6392	25.6322	1964.7	0.141796	10.8582	0
A354	F	11	354	137	35.8	1652	19.074	1652	8.26	25.6392	25.6322	1244.7	-1.34477	12.3448	1
A355	F	11	355	169	59.1	1652	20.6926	1652	8.26	25.6392	25.6322	1964.7	0.141796	10.8582	0
A356	F	11	356	137	35.8	1652	19.074	1652	8.26	25.6392	25.6322	1244.7	-1.34477	12.3448	1
A357	F	11	357	169	59.1	1652	20.6926	1652	8.26	25.6392	25.6322	1964.7	0.141796	10.8582	0
A358	F	11	358	157	55	1660	22.4756	1660	8.3	25.8181	25.811	1694.7	-0.415667	11.4157	0
A359	F	11	359	141	39	1660	19.6167	1660	8.3	25.8181	25.811	1334.7	-1.15895	12.1589	1
A360	F	11	360	156	40	1660	16.4366	1660	8.3	25.8181	25.811	1672.2	-0.462122	11.4621	0
A361	F	11	361	157	55	1660	22.4756	1660	8.3	25.8181	25.811	1694.7	-0.415667	11.4157	0
A362	F	11	362	141	39	1660	19.6167	1660	8.3	25.8181	25.811	1334.7	-1.15895	12.1589	1
A363	F	11	363	156	40	1660	16.4366	1660	8.3	25.8181	25.811	1672.2	-0.462122	11.4621	0
A364	F	11	364	154	55	1660	23.1911	1660	8.3	25.8181	25.811	1627.2	-0.555032	11.555	1
A365	F	11	365	156	40	1660	16.4366	1660	8.3	25.8181	25.811	1672.2	-0.462122	11.4621	0
A366	F	11	366	141	39	1660	19.6167	1660	8.3	25.8181	25.811	1334.7	-1.15895	12.1589	1
A367	F	11	367	150	46	1661.54	20.4444	1661.54	8.30769	25.8524	25.8454	1537.2	-0.740853	11.7409	1
A368	F	11	368	155	52	1661.54	21.6441	1661.54	8.30769	25.8524	25.8454	1649.7	-0.508577	11.5086	1
A369	F	11	369	155	42	1668	17.4818	1668	8.34	25.9969	25.9898	1649.7	-0.508577	11.5086	1
A370	F	11	370	155	42	1668	17.4818	1668	8.34	25.9969	25.9898	1649.7	-0.508577	11.5086	1
A371	F	11	371	143	48.3	1674	23.6197	1674	8.37	26.131	26.1239	1379.7	-1.06604	12.066	1
A372	F	11	372	136	32	1674	17.301	1674	8.37	26.131	26.1239	1222.2	-1.39123	12.3912	1
A373	F	11	373	155	37	1674	15.4006	1674	8.37	26.131	26.1239	1649.7	-0.508577	11.5086	1
A374	F	11	374	164	54	1674	20.0773	1674	8.37	26.131	26.1239	1852.2	-0.0904802	11.0905	0
A375	F	11	375	143	48.3	1674	23.6197	1674	8.37	26.131	26.1239	1379.7	-1.06604	12.066	1
A376	F	11	376	136	32	1674	17.301	1674	8.37	26.131	26.1239	1222.2	-1.39123	12.3912	1
A377	F	11	377	155	37	1674	15.4006	1674	8.37	26.131	26.1239	1649.7	-0.508577	11.5086	1
A378	F	11	378	164	54	1674	20.0773	1674	8.37	26.131	26.1239	1852.2	-0.0904802	11.0905	0
A379	F	11	379	164	54	1674	20.0773	1674	8.37	26.131	26.1239	1852.2	-0.0904802	11.0905	0
A380	F	11	380	155	37	1674	15.4006	1674	8.37	26.131	26.1239	1649.7	-0.508577	11.5086	1
A381	F	11	381	139.5	45.7	1674	23.4838	1674	8.37	26.131	26.1239	1300.95	-1.22863	12.2286	1
A382	F	11	382	143	48.3	1674	23.6197	1674	8.37	26.131	26.1239	1379.7	-1.06604	12.066	1
A383	F	11	383	130	28	1674.42	16.568	1674.42	8.37209	26.1403	26.1333	1087.2	-1.66996	12.67	2
A384	F	11	384	160	49	1676	19.1406	1676	8.38	26.1757	26.1686	1762.2	-0.276301	11.2763	0
A385	F	11	385	160	49	1676	19.1406	1676	8.38	26.1757	26.1686	1762.2	-0.276301	11.2763	0
A386	F	11	386	160	49	1676	19.1406	1676	8.38	26.1757	26.1686	1762.2	-0.276301	11.2763	0
A387	F	11	387	149	40	1683	17.9271	1683	8.415	26.3321	26.3251	1514.7	-0.787308	11.7873	1
A388	F	11	388	149	40	1683	17.9271	1683	8.415	26.3321	26.3251	1514.7	-0.787308	11.7873	1
A389	F	11	389	144.5	38	1683	18.199	1683	8.415	26.3321	26.3251	1413.45	-0.996357	11.9964	1
A390	F	11	390	140	33.5	1690	17.0918	1690	8.45	26.4886	26.4815	1312.2	-1.2054	12.2054	1
A391	F	11	391	141	31	1690	15.5928	1690	8.45	26.4886	26.4815	1334.7	-1.15895	12.1589	1
A392	F	11	392	148	35.5	1690	16.2071	1690	8.45	26.4886	26.4815	1492.2	-0.833763	11.8338	1
A393	F	11	393	140	33.5	1690	17.0918	1690	8.45	26.4886	26.4815	1312.2	-1.2054	12.2054	1
A394	F	11	394	141	31	1690	15.5928	1690	8.45	26.4886	26.4815	1334.7	-1.15895	12.1589	1
A395	F	11	395	148	35.5	1690	16.2071	1690	8.45	26.4886	26.4815	1492.2	-0.833763	11.8338	1
A396	F	11	396	148	35.5	1690	16.2071	1690	8.45	26.4886	26.4815	1492.2	-0.833763	11.8338	1
A397	F	11	397	141	31	1690	15.5928	1690	8.45	26.4886	26.4815	1334.7	-1.15895	12.1589	1
A398	F	11	398	140	33.5	1690	17.0918	1690	8.45	26.4886	26.4815	1312.2	-1.2054	12.2054	1
A399	F	11	399	135	32	1692	17.5583	1692	8.46	26.5333	26.5262	1199.7	-1.43768	12.4377	1
A400	F	11		135	32	1692	17.5583	1692	8.46	26.5333	26.5262	1199.7	-1.43768	12.4377	1
A401	F	11		153	40.2	1698	17.1729	1698	8.49	26.6674	26.6603	1604.7	-0.601487	11.6015	1
A402	F	11		153	40.2	1698	17.1729	1698	8.49	26.6674	26.6603	1604.7	-0.601487	11.6015	1
A403	F	11		153	40.2	1698	17.1729	1698	8.49	26.6674	26.6603	1604.7	-0.601487	11.6015	1
A404	F	11		154	50	1700	21.0828	1700	8.5	26.7121	26.705	1627.2	-0.555032	11.555	1
A405	F	11		143	29.4	1700	14.3772	1700	8.5	26.7121	26.705	1379.7	-1.06604	12.066	1
A406	F	11		154	50	1700	21.0828	1700	8.5	26.7121	26.705	1627.2	-0.555032	11.555	1
A407	F	11		154	50	1700	21.0828	1700	8.5	26.7121	26.705	1627.2	-0.555032	11.555	1
A408	F	11		143	29.4	1700	14.3772	1700	8.5	26.7121	26.705	1379.7	-1.06604	12.066	1
A409	F	11		161	53	1700	20.4467	1700	8.5	26.7121	26.705	1784.7	-0.229846	11.2298	0
A410	F	11		145	42	1701	19.786	1701	8.505	26.7345	26.7274	1424.7	-0.973129	11.9731	1
A411	F	11		145	42	1701	19.786	1701	8.505	26.7345	26.7274	1424.7	-0.973129	11.9731	1
A412	F	11		142	30	1704	14.878	1704	8.52	26.8015	26.7944	1357.2	-1.11249	12.1125	1
A413	F	11		140	30	1705.26	15.3061	1705.26	8.52632	26.8298	26.8226	1312.2	-1.2054	12.2054	1
A414	F	11		142	31	1705.26	15.3739	1705.26	8.52632	26.8298	26.8226	1357.2	-1.11249	12.1125	1
A415	F	11		150	35	1705.26	15.5556	1705.26	8.52632	26.8298	26.8226	1537.2	-0.740853	11.7409	1
A416	F	11		160	50	1707	19.5312	1707	8.535	26.8686	26.8615	1762.2	-0.276301	11.2763	0
A417	F	11		160	50	1707	19.5312	1707	8.535	26.8686	26.8615	1762.2	-0.276301	11.2763	0
A418	F	11		160	50	1707	19.5312	1707	8.535	26.8686	26.8615	1762.2	-0.276301	11.2763	0
A419	F	11		157	38.5	1708	15.6193	1708	8.54	26.8909	26.8838	1694.7	-0.415667	11.4157	0
A420	F	11		157	38.5	1708	15.6193	1708	8.54	26.8909	26.8838	1694.7	-0.415667	11.4157	0
A421	F	11		145	40.7	1708	19.3579	1708	8.54	26.8909	26.8838	1424.7	-0.973129	11.9731	1
A422	F	11		157	38.5	1708	15.6193	1708	8.54	26.8909	26.8838	1694.7	-0.415667	11.4157	0
A423	F	11		142	34	1710	17.0105	1710	8.55	26.9356	26.9285	1357.2	-1.11249	12.1125	1
A424	F	11		143	35.6	1710	17.4092	1710	8.55	26.9356	26.9285	1379.7	-1.06604	12.066	1
A425	F	11		153	38.5	1710	16.4467	1710	8.55	26.9356	26.9285	1604.7	-0.601487	11.6015	1
A426	F	11		142	34	1710	17.0105	1710	8.55	26.9356	26.9285	1357.2	-1.11249	12.1125	1
A427	F	11		143	35.6	1710	17.4092	1710	8.55	26.9356	26.9285	1379.7	-1.06604	12.066	1
A428	F	11		153	38.5	1710	16.4467	1710	8.55	26.9356	26.9285	1604.7	-0.601487	11.6015	1
A429	F	11		143	35.6	1710	17.4092	1710	8.55	26.9356	26.9285	1379.7	-1.06604	12.066	1
A430	F	11		153	38.5	1710	16.4467	1710	8.55	26.9356	26.9285	1604.7	-0.601487	11.6015	1
A431	F	11		155	43	1714.29	17.898	1714.29	8.57143	27.0314	27.0243	1649.7	-0.508577	11.5086	1
A432	F	11		150	40	1720	17.7778	1720	8.6	27.1591	27.152	1537.2	-0.740853	11.7409	1
A433	F	11		158	67.4	1720	26.9989	1720	8.6	27.1591	27.152	1717.2	-0.369211	11.3692	0
A434	F	11		150	40	1720	17.7778	1720	8.6	27.1591	27.152	1537.2	-0.740853	11.7409	1
A435	F	11		158	67.4	1720	26.9989	1720	8.6	27.1591	27.152	1717.2	-0.369211	11.3692	0
A436	F	11		150	40	1720	17.7778	1720	8.6	27.1591	27.152	1537.2	-0.740853	11.7409	1
A437	F	11		165	42	1720	15.427	1720	8.6	27.1591	27.152	1874.7	-0.044025	11.044	0
A438	F	11		156	51	1725	20.9566	1725	8.625	27.2709	27.2638	1672.2	-0.462122	11.4621	0
A439	F	11		156	51	1725	20.9566	1725	8.625	27.2709	27.2638	1672.2	-0.462122	11.4621	0
A440	F	11		156	51	1725	20.9566	1725	8.625	27.2709	27.2638	1672.2	-0.462122	11.4621	0
A441	F	11		146	34.6	1728	16.2319	1728	8.64	27.338	27.3308	1447.2	-0.926674	11.9267	1
A442	F	11		155	42.1	1728	17.5234	1728	8.64	27.338	27.3308	1649.7	-0.508577	11.5086	1
A443	F	11		133	27	1728	15.2637	1728	8.64	27.338	27.3308	1154.7	-1.53059	12.5306	2
A444	F	11		150	42	1728	18.6667	1728	8.64	27.338	27.3308	1537.2	-0.740853	11.7409	1
A445	F	11		160	50.6	1728	19.7656	1728	8.64	27.338	27.3308	1762.2	-0.276301	11.2763	0
A446	F	11		146	34.6	1728	16.2319	1728	8.64	27.338	27.3308	1447.2	-0.926674	11.9267	1
A447	F	11		155	42.1	1728	17.5234	1728	8.64	27.338	27.3308	1649.7	-0.508577	11.5086	1
A448	F	11		133	27	1728	15.2637	1728	8.64	27.338	27.3308	1154.7	-1.53059	12.5306	2
A449	F	11		150	42	1728	18.6667	1728	8.64	27.338	27.3308	1537.2	-0.740853	11.7409	1
A450	F	11		160	50.6	1728	19.7656	1728	8.64	27.338	27.3308	1762.2	-0.276301	11.2763	0
A451	F	11		147	32	1728	14.8086	1728	8.64	27.338	27.3308	1469.7	-0.880219	11.8802	1
A452	F	11		144	31	1728	14.9498	1728	8.64	27.338	27.3308	1402.2	-1.01958	12.0196	1
A453	F	11		138	36	1728	18.9036	1728	8.64	27.338	27.3308	1267.2	-1.29832	12.2983	1
A454	F	11		160	50.6	1728	19.7656	1728	8.64	27.338	27.3308	1762.2	-0.276301	11.2763	0
A455	F	11		140	45.6	1728	23.2653	1728	8.64	27.338	27.3308	1312.2	-1.2054	12.2054	1
A456	F	11		145	49.3	1728	23.4483	1728	8.64	27.338	27.3308	1424.7	-0.973129	11.9731	1
A457	F	11		155	42.1	1728	17.5234	1728	8.64	27.338	27.3308	1649.7	-0.508577	11.5086	1
A458	F	11		146	34.6	1728	16.2319	1728	8.64	27.338	27.3308	1447.2	-0.926674	11.9267	1
A459	F	11		158	41.7	1730	16.7041	1730	8.65	27.3827	27.3755	1717.2	-0.369211	11.3692	0
A460	F	11		146	36	1730	16.8887	1730	8.65	27.3827	27.3755	1447.2	-0.926674	11.9267	1
A461	F	11		158	41.7	1730	16.7041	1730	8.65	27.3827	27.3755	1717.2	-0.369211	11.3692	0
A462	F	11		146	36	1730	16.8887	1730	8.65	27.3827	27.3755	1447.2	-0.926674	11.9267	1
A463	F	11		158	41.7	1730	16.7041	1730	8.65	27.3827	27.3755	1717.2	-0.369211	11.3692	0
A464	F	11		146	36	1730	16.8887	1730	8.65	27.3827	27.3755	1447.2	-0.926674	11.9267	1
A465	F	11		150	40	1731	17.7778	1731	8.655	27.405	27.3979	1537.2	-0.740853	11.7409	1
A466	F	11		156	48	1731	19.7239	1731	8.655	27.405	27.3979	1672.2	-0.462122	11.4621	0
A467	F	11		150	40	1731	17.7778	1731	8.655	27.405	27.3979	1537.2	-0.740853	11.7409	1
A468	F	11		156	48	1731	19.7239	1731	8.655	27.405	27.3979	1672.2	-0.462122	11.4621	0
A469	F	11		152	49	1733	21.2084	1733	8.665	27.4497	27.4426	1582.2	-0.647943	11.6479	1
A470	F	11		154	51.3	1733	21.631	1733	8.665	27.4497	27.4426	1627.2	-0.555032	11.555	1
A471	F	11		159	51	1733	20.1733	1733	8.665	27.4497	27.4426	1739.7	-0.322756	11.3228	0
A472	F	11		152	49	1733	21.2084	1733	8.665	27.4497	27.4426	1582.2	-0.647943	11.6479	1
A473	F	11		154	51.3	1733	21.631	1733	8.665	27.4497	27.4426	1627.2	-0.555032	11.555	1
A474	F	11		159	51	1733	20.1733	1733	8.665	27.4497	27.4426	1739.7	-0.322756	11.3228	0
A475	F	11		152	49	1733	21.2084	1733	8.665	27.4497	27.4426	1582.2	-0.647943	11.6479	1
A476	F	11		154	51.3	1733	21.631	1733	8.665	27.4497	27.4426	1627.2	-0.555032	11.555	1
A477	F	11		159	51	1733	20.1733	1733	8.665	27.4497	27.4426	1739.7	-0.322756	11.3228	0
A478	F	11		164	41	1740	15.2439	1740	8.7	27.6062	27.599	1852.2	-0.0904802	11.0905	0
A479	F	11		164	41	1740	15.2439	1740	8.7	27.6062	27.599	1852.2	-0.0904802	11.0905	0
A480	F	11		154	42.1	1740	17.7517	1740	8.7	27.6062	27.599	1627.2	-0.555032	11.555	1
A481	F	11		164	41	1740	15.2439	1740	8.7	27.6062	27.599	1852.2	-0.0904802	11.0905	0
A482	F	11		136	29	1742	15.6791	1742	8.71	27.6509	27.6437	1222.2	-1.39123	12.3912	1
A483	F	11		136	29	1742	15.6791	1742	8.71	27.6509	27.6437	1222.2	-1.39123	12.3912	1
A484	F	11		136	29	1742	15.6791	1742	8.71	27.6509	27.6437	1222.2	-1.39123	12.3912	1
A485	F	11		134	31	1743	17.2644	1743	8.715	27.6732	27.6661	1177.2	-1.48414	12.4841	1
A486	F	11		134	31	1743	17.2644	1743	8.715	27.6732	27.6661	1177.2	-1.48414	12.4841	1
A487	F	11		154	39	1748	16.4024	1748	8.74	27.785	27.7778	1627.2	-0.555032	11.555	1
A488	F	11		162	53	1748	20.1951	1748	8.74	27.785	27.7778	1807.2	-0.183391	11.1834	0
A489	F	11		154	39	1748	16.4024	1748	8.74	27.785	27.7778	1627.2	-0.555032	11.555	1
A490	F	11		162	53	1748	20.1951	1748	8.74	27.785	27.7778	1807.2	-0.183391	11.1834	0
A491	F	11		162	53	1748	20.1951	1748	8.74	27.785	27.7778	1807.2	-0.183391	11.1834	0
A492	F	11		167	77.4	1749	27.7529	1749	8.745	27.8073	27.8002	1919.7	0.0488854	10.9511	0
A493	F	11		167	77.4	1749	27.7529	1749	8.745	27.8073	27.8002	1919.7	0.0488854	10.9511	0
A494	F	11		138	29	1750	15.2279	1750	8.75	27.8297	27.8225	1267.2	-1.29832	12.2983	1
A495	F	11		153	38	1750	16.2331	1750	8.75	27.8297	27.8225	1604.7	-0.601487	11.6015	1
A496	F	11		138	29	1750	15.2279	1750	8.75	27.8297	27.8225	1267.2	-1.29832	12.2983	1
A497	F	11		153	38	1750	16.2331	1750	8.75	27.8297	27.8225	1604.7	-0.601487	11.6015	1
A498	F	11		153	38	1750	16.2331	1750	8.75	27.8297	27.8225	1604.7	-0.601487	11.6015	1
A499	F	11		138	29	1750	15.2279	1750	8.75	27.8297	27.8225	1267.2	-1.29832	12.2983	1
A500	F	11		142	36	1751.35	17.8536	1751.35	8.75676	27.8599	27.8527	1357.2	-1.11249	12.1125	1
A501	F	11		144	40	1752	19.2901	1752	8.76	27.8744	27.8672	1402.2	-1.01958	12.0196	1
A502	F	11		144	40	1752	19.2901	1752	8.76	27.8744	27.8672	1402.2	-1.01958	12.0196	1
A503	F	11		157	40	1755	16.2278	1755	8.775	27.9414	27.9342	1694.7	-0.415667	11.4157	0
A504	F	11		157	40	1755	16.2278	1755	8.775	27.9414	27.9342	1694.7	-0.415667	11.4157	0
A505	F	11		157	40	1755	16.2278	1755	8.775	27.9414	27.9342	1694.7	-0.415667	11.4157	0
A506	F	11		154	34.1	1760	14.3785	1760	8.8	28.0532	28.046	1627.2	-0.555032	11.555	1
A507	F	11		143	38	1760	18.5828	1760	8.8	28.0532	28.046	1379.7	-1.06604	12.066	1
A508	F	11		154	34.1	1760	14.3785	1760	8.8	28.0532	28.046	1627.2	-0.555032	11.555	1
A509	F	11		151	38	1760.87	16.6659	1760.87	8.80435	28.0726	28.0654	1559.7	-0.694398	11.6944	1
A510	F	11		148	40	1760.87	18.2615	1760.87	8.80435	28.0726	28.0654	1492.2	-0.833763	11.8338	1
A511	F	11		159	48.8	1761	19.303	1761	8.805	28.0755	28.0684	1739.7	-0.322756	11.3228	0
A512	F	11		159	48.8	1761	19.303	1761	8.805	28.0755	28.0684	1739.7	-0.322756	11.3228	0
A513	F	11		159	48.8	1761	19.303	1761	8.805	28.0755	28.0684	1739.7	-0.322756	11.3228	0
A514	F	11		166	43	1764	15.6046	1764	8.82	28.1426	28.1354	1897.2	0.0024302	10.9976	0
A515	F	11		166	43	1764	15.6046	1764	8.82	28.1426	28.1354	1897.2	0.0024302	10.9976	0
A516	F	11		165	65	1764	23.8751	1764	8.82	28.1426	28.1354	1874.7	-0.044025	11.044	0
A517	F	11		166	43	1764	15.6046	1764	8.82	28.1426	28.1354	1897.2	0.0024302	10.9976	0
A518	F	11		164	52	1765	19.3337	1765	8.825	28.165	28.1578	1852.2	-0.0904802	11.0905	0
A519	F	11		164	52	1765	19.3337	1765	8.825	28.165	28.1578	1852.2	-0.0904802	11.0905	0
A520	F	11		164	52	1765	19.3337	1765	8.825	28.165	28.1578	1852.2	-0.0904802	11.0905	0
A521	F	11		152	51.3	1767	22.2039	1767	8.835	28.2097	28.2024	1582.2	-0.647943	11.6479	1
A522	F	11		152	40	1767	17.313	1767	8.835	28.2097	28.2024	1582.2	-0.647943	11.6479	1
A523	F	11		152	51.3	1767	22.2039	1767	8.835	28.2097	28.2024	1582.2	-0.647943	11.6479	1
A524	F	11		152	40	1767	17.313	1767	8.835	28.2097	28.2024	1582.2	-0.647943	11.6479	1
A525	F	11		152	51.3	1767	22.2039	1767	8.835	28.2097	28.2024	1582.2	-0.647943	11.6479	1
A526	F	11		152	40	1767	17.313	1767	8.835	28.2097	28.2024	1582.2	-0.647943	11.6479	1
A527	F	11		145	36.5	1768	17.3603	1768	8.84	28.232	28.2248	1424.7	-0.973129	11.9731	1
A528	F	11		145	36.5	1768	17.3603	1768	8.84	28.232	28.2248	1424.7	-0.973129	11.9731	1
A529	F	11		145	36.5	1768	17.3603	1768	8.84	28.232	28.2248	1424.7	-0.973129	11.9731	1
A530	F	11		147	51	1769	23.6013	1769	8.845	28.2544	28.2471	1469.7	-0.880219	11.8802	1
A531	F	11		160	50.6	1769	19.7656	1769	8.845	28.2544	28.2471	1762.2	-0.276301	11.2763	0
A532	F	11		159	35	1769	13.8444	1769	8.845	28.2544	28.2471	1739.7	-0.322756	11.3228	0
A533	F	11		147	51	1769	23.6013	1769	8.845	28.2544	28.2471	1469.7	-0.880219	11.8802	1
A534	F	11		160	50.6	1769	19.7656	1769	8.845	28.2544	28.2471	1762.2	-0.276301	11.2763	0
A535	F	11		160	50.6	1769	19.7656	1769	8.845	28.2544	28.2471	1762.2	-0.276301	11.2763	0
A536	F	11		159	35	1769	13.8444	1769	8.845	28.2544	28.2471	1739.7	-0.322756	11.3228	0
A537	F	11		147	51	1769	23.6013	1769	8.845	28.2544	28.2471	1469.7	-0.880219	11.8802	1
A538	F	11		138	39	1770	20.4789	1770	8.85	28.2767	28.2695	1267.2	-1.29832	12.2983	1
A539	F	11		153	35.2	1775	15.037	1775	8.875	28.3885	28.3813	1604.7	-0.601487	11.6015	1
A540	F	11		153	35.2	1775	15.037	1775	8.875	28.3885	28.3813	1604.7	-0.601487	11.6015	1
A541	F	11		153	35.2	1775	15.037	1775	8.875	28.3885	28.3813	1604.7	-0.601487	11.6015	1
A542	F	11		144	33	1775.34	15.9144	1775.34	8.87671	28.3961	28.3889	1402.2	-1.01958	12.0196	1
A543	F	11		154	63	1782	26.3957	1782	8.91	28.5449	28.5377	1627.2	-0.555032	11.555	1
A544	F	11		138	28.8	1782	15.1229	1782	8.91	28.5449	28.5377	1267.2	-1.29832	12.2983	1
A545	F	11		139	40	1782	20.7029	1782	8.91	28.5449	28.5377	1289.7	-1.25186	12.2519	1
A546	F	11		154	63	1782	26.3957	1782	8.91	28.5449	28.5377	1627.2	-0.555032	11.555	1
A547	F	11		138	28.8	1782	15.1229	1782	8.91	28.5449	28.5377	1267.2	-1.29832	12.2983	1
A548	F	11		139	40	1782	20.7029	1782	8.91	28.5449	28.5377	1289.7	-1.25186	12.2519	1
A549	F	11		150	50	1782	22.2222	1782	8.91	28.5449	28.5377	1537.2	-0.740853	11.7409	1
A550	F	11		152	41	1782	17.7458	1782	8.91	28.5449	28.5377	1582.2	-0.647943	11.6479	1
A551	F	11		138	28.8	1782	15.1229	1782	8.91	28.5449	28.5377	1267.2	-1.29832	12.2983	1
A552	F	11		147	41	1785.12	18.9736	1785.12	8.92562	28.6148	28.6075	1469.7	-0.880219	11.8802	1
A553	F	11		139	45	1790	23.0319	1790	8.95	28.7237	28.7165	1289.7	-1.25186	12.2519	1
A554	F	11		154	48	1790	20.2395	1790	8.95	28.7237	28.7165	1627.2	-0.555032	11.555	1
A555	F	11		139	45	1790	23.0319	1790	8.95	28.7237	28.7165	1289.7	-1.25186	12.2519	1
A556	F	11		154	48	1790	20.2395	1790	8.95	28.7237	28.7165	1627.2	-0.555032	11.555	1
A557	F	11		154	48	1790	20.2395	1790	8.95	28.7237	28.7165	1627.2	-0.555032	11.555	1
A558	F	11		142	38	1790	18.8455	1790	8.95	28.7237	28.7165	1357.2	-1.11249	12.1125	1
A559	F	11		161	41	1795.01	15.8173	1795.01	8.97507	28.8358	28.8286	1784.7	-0.229846	11.2298	0
A560	F	11		150	43	1800	19.2444	1800	9	28.9473	28.94	1537.2	-0.740853	11.7409	1
A561	F	11		162	53	1800	20.1951	1800	9	28.9473	28.94	1807.2	-0.183391	11.1834	0
A562	F	11		146	33	1800	15.4813	1800	9	28.9473	28.94	1447.2	-0.926674	11.9267	1
A563	F	11		155	47	1800	19.563	1800	9	28.9473	28.94	1649.7	-0.508577	11.5086	1
A564	F	11		150	43	1800	19.2444	1800	9	28.9473	28.94	1537.2	-0.740853	11.7409	1
A565	F	11		162	53	1800	20.1951	1800	9	28.9473	28.94	1807.2	-0.183391	11.1834	0
A566	F	11		146	33	1800	15.4813	1800	9	28.9473	28.94	1447.2	-0.926674	11.9267	1
A567	F	11		155	47	1800	19.563	1800	9	28.9473	28.94	1649.7	-0.508577	11.5086	1
A568	F	11		146	33	1800	15.4813	1800	9	28.9473	28.94	1447.2	-0.926674	11.9267	1
A569	F	11		143	33.2	1800	16.2355	1800	9	28.9473	28.94	1379.7	-1.06604	12.066	1
A570	F	11		141	32.5	1800	16.3473	1800	9	28.9473	28.94	1334.7	-1.15895	12.1589	1
A571	F	11		158	45	1800	18.026	1800	9	28.9473	28.94	1717.2	-0.369211	11.3692	0
A572	F	11		155	47	1800	19.563	1800	9	28.9473	28.94	1649.7	-0.508577	11.5086	1
A573	F	11		151	43	1802	18.815	1802	9.01	28.992	28.9847	1559.7	-0.694398	11.6944	1
A574	F	11		151	43	1802	18.815	1802	9.01	28.992	28.9847	1559.7	-0.694398	11.6944	1
A575	F	11		143	33	1803	16.1377	1803	9.015	29.0143	29.007	1379.7	-1.06604	12.066	1
A576	F	11		143	33	1803	16.1377	1803	9.015	29.0143	29.007	1379.7	-1.06604	12.066	1
A577	F	11		138	33	1810	17.3283	1810	9.05	29.1708	29.1635	1267.2	-1.29832	12.2983	1
A578	F	11		147	42.2	1810	19.5289	1810	9.05	29.1708	29.1635	1469.7	-0.880219	11.8802	1
A579	F	11		138	33	1810	17.3283	1810	9.05	29.1708	29.1635	1267.2	-1.29832	12.2983	1
A580	F	11		147	42.2	1810	19.5289	1810	9.05	29.1708	29.1635	1469.7	-0.880219	11.8802	1
A581	F	11		151	46	1810	20.1746	1810	9.05	29.1708	29.1635	1559.7	-0.694398	11.6944	1
A582	F	11		138	33	1810	17.3283	1810	9.05	29.1708	29.1635	1267.2	-1.29832	12.2983	1
A583	F	11		147	42.2	1810	19.5289	1810	9.05	29.1708	29.1635	1469.7	-0.880219	11.8802	1
A584	F	11		155	39	1810.06	16.2331	1810.06	9.05028	29.172	29.1647	1649.7	-0.508577	11.5086	1
A585	F	11		138	43	1810.06	22.5793	1810.06	9.05028	29.172	29.1647	1267.2	-1.29832	12.2983	1
A586	F	11		140	30	1815.13	15.3061	1815.13	9.07563	29.2853	29.2781	1312.2	-1.2054	12.2054	1
A587	F	11		150	55	1815.13	24.4444	1815.13	9.07563	29.2853	29.2781	1537.2	-0.740853	11.7409	1
A588	F	11		154	39	1816	16.4446	1816	9.08	29.3049	29.2976	1627.2	-0.555032	11.555	1
A589	F	11		154	39	1816	16.4446	1816	9.08	29.3049	29.2976	1627.2	-0.555032	11.555	1
A590	F	11		164	55	1819	20.4491	1819	9.095	29.3719	29.3647	1852.2	-0.0904802	11.0905	0
A591	F	11		164	55	1819	20.4491	1819	9.095	29.3719	29.3647	1852.2	-0.0904802	11.0905	0
A592	F	11		164	55	1819	20.4491	1819	9.095	29.3719	29.3647	1852.2	-0.0904802	11.0905	0
A593	F	11		152	59.8	1820	25.883	1820	9.1	29.3943	29.387	1582.2	-0.647943	11.6479	1
A594	F	11		152	59.8	1820	25.883	1820	9.1	29.3943	29.387	1582.2	-0.647943	11.6479	1
A595	F	11		137	26	1825	13.8526	1825	9.125	29.506	29.4988	1244.7	-1.34477	12.3448	1
A596	F	11		155	40	1825.35	16.6493	1825.35	9.12676	29.5139	29.5066	1649.7	-0.508577	11.5086	1
A597	F	11		148	42	1825.35	19.1746	1825.35	9.12676	29.5139	29.5066	1492.2	-0.833763	11.8338	1
A598	F	11		154	36	1826	15.1796	1826	9.13	29.5284	29.5211	1627.2	-0.555032	11.555	1
A599	F	11		154	36	1826	15.1796	1826	9.13	29.5284	29.5211	1627.2	-0.555032	11.555	1
A600	F	11		154	36	1826	15.1796	1826	9.13	29.5284	29.5211	1627.2	-0.555032	11.555	1
A601	F	11		150	32	1827	14	1827	9.135	29.5507	29.5434	1537.2	-0.740853	11.7409	1
A602	F	11		150	32	1827	14	1827	9.135	29.5507	29.5434	1537.2	-0.740853	11.7409	1
A603	F	11		151	40	1830	17.5431	1830	9.15	29.6178	29.6105	1559.7	-0.694398	11.6944	1
A604	F	11		155	52	1830	21.6441	1830	9.15	29.6178	29.6105	1649.7	-0.508577	11.5086	1
A605	F	11		164	46.2	1830	17.1773	1830	9.15	29.6178	29.6105	1852.2	-0.0904802	11.0905	0
A606	F	11		151	40	1830	17.5431	1830	9.15	29.6178	29.6105	1559.7	-0.694398	11.6944	1
A607	F	11		155	52	1830	21.6441	1830	9.15	29.6178	29.6105	1649.7	-0.508577	11.5086	1
A608	F	11		164	46.2	1830	17.1773	1830	9.15	29.6178	29.6105	1852.2	-0.0904802	11.0905	0
A609	F	11		151	40	1830	17.5431	1830	9.15	29.6178	29.6105	1559.7	-0.694398	11.6944	1
A610	F	11		164	46.2	1830	17.1773	1830	9.15	29.6178	29.6105	1852.2	-0.0904802	11.0905	0
A611	F	11		164	46.2	1830	17.1773	1830	9.15	29.6178	29.6105	1852.2	-0.0904802	11.0905	0
A612	F	11		155	52	1830	21.6441	1830	9.15	29.6178	29.6105	1649.7	-0.508577	11.5086	1
A613	F	11		149	43	1830.51	19.3685	1830.51	9.15254	29.6292	29.6219	1514.7	-0.787308	11.7873	1
A614	F	11		151	45	1831	19.736	1831	9.155	29.6401	29.6329	1559.7	-0.694398	11.6944	1
A615	F	11		151	45	1831	19.736	1831	9.155	29.6401	29.6329	1559.7	-0.694398	11.6944	1
A616	F	11		151	45	1831	19.736	1831	9.155	29.6401	29.6329	1559.7	-0.694398	11.6944	1
A617	F	11		138	31	1835	16.2781	1835	9.175	29.7295	29.7223	1267.2	-1.29832	12.2983	1
A618	F	11		138	31	1835	16.2781	1835	9.175	29.7295	29.7223	1267.2	-1.29832	12.2983	1
A619	F	11		138	31	1835	16.2781	1835	9.175	29.7295	29.7223	1267.2	-1.29832	12.2983	1
A620	F	11		166	47	1835.69	17.0562	1835.69	9.17847	29.7451	29.7378	1897.2	0.0024302	10.9976	0
A621	F	11		151	47.5	1836	20.8324	1836	9.18	29.7519	29.7446	1559.7	-0.694398	11.6944	1
A622	F	11		154	48.1	1836	20.2817	1836	9.18	29.7519	29.7446	1627.2	-0.555032	11.555	1
A623	F	11		161	46.7	1836	18.0163	1836	9.18	29.7519	29.7446	1784.7	-0.229846	11.2298	0
A624	F	11		146	38	1836	17.827	1836	9.18	29.7519	29.7446	1447.2	-0.926674	11.9267	1
A625	F	11		148	43	1836	19.6311	1836	9.18	29.7519	29.7446	1492.2	-0.833763	11.8338	1
A626	F	11		155	49	1836	20.3954	1836	9.18	29.7519	29.7446	1649.7	-0.508577	11.5086	1
A627	F	11		151	47.5	1836	20.8324	1836	9.18	29.7519	29.7446	1559.7	-0.694398	11.6944	1
A628	F	11		154	48.1	1836	20.2817	1836	9.18	29.7519	29.7446	1627.2	-0.555032	11.555	1
A629	F	11		161	46.7	1836	18.0163	1836	9.18	29.7519	29.7446	1784.7	-0.229846	11.2298	0
A630	F	11		146	38	1836	17.827	1836	9.18	29.7519	29.7446	1447.2	-0.926674	11.9267	1
A631	F	11		148	43	1836	19.6311	1836	9.18	29.7519	29.7446	1492.2	-0.833763	11.8338	1
A632	F	11		155	49	1836	20.3954	1836	9.18	29.7519	29.7446	1649.7	-0.508577	11.5086	1
A633	F	11		162	54	1836	20.5761	1836	9.18	29.7519	29.7446	1807.2	-0.183391	11.1834	0
A634	F	11		145	40	1836	19.025	1836	9.18	29.7519	29.7446	1424.7	-0.973129	11.9731	1
A635	F	11		148	43	1836	19.6311	1836	9.18	29.7519	29.7446	1492.2	-0.833763	11.8338	1
A636	F	11		155	49	1836	20.3954	1836	9.18	29.7519	29.7446	1649.7	-0.508577	11.5086	1
A637	F	11		161	46.7	1836	18.0163	1836	9.18	29.7519	29.7446	1784.7	-0.229846	11.2298	0
A638	F	11		151	47.5	1836	20.8324	1836	9.18	29.7519	29.7446	1559.7	-0.694398	11.6944	1
A639	F	11		154	48.1	1836	20.2817	1836	9.18	29.7519	29.7446	1627.2	-0.555032	11.555	1
A640	F	11		156	43	1840	17.6693	1840	9.2	29.8413	29.834	1672.2	-0.462122	11.4621	0
A641	F	11		156	43	1840	17.6693	1840	9.2	29.8413	29.834	1672.2	-0.462122	11.4621	0
A642	F	11		156	43	1840	17.6693	1840	9.2	29.8413	29.834	1672.2	-0.462122	11.4621	0
A643	F	11		141	29	1840.91	14.5868	1840.91	9.20455	29.8616	29.8543	1334.7	-1.15895	12.1589	1
A644	F	11		154	43	1845	18.1312	1845	9.225	29.9531	29.9458	1627.2	-0.555032	11.555	1
A645	F	11		154	43	1845	18.1312	1845	9.225	29.9531	29.9458	1627.2	-0.555032	11.555	1
A646	F	11		154	43	1845	18.1312	1845	9.225	29.9531	29.9458	1627.2	-0.555032	11.555	1
A647	F	11		150	40	1846	17.7778	1846	9.23	29.9754	29.9681	1537.2	-0.740853	11.7409	1
A648	F	11		150	40	1846	17.7778	1846	9.23	29.9754	29.9681	1537.2	-0.740853	11.7409	1
A649	F	11		150	40	1846	17.7778	1846	9.23	29.9754	29.9681	1537.2	-0.740853	11.7409	1
A650	F	11		152	40	1848	17.313	1848	9.24	30.0201	30.0128	1582.2	-0.647943	11.6479	1
A651	F	11		162	45	1848	17.1468	1848	9.24	30.0201	30.0128	1807.2	-0.183391	11.1834	0
A652	F	11		152	40	1848	17.313	1848	9.24	30.0201	30.0128	1582.2	-0.647943	11.6479	1
A653	F	11		162	45	1848	17.1468	1848	9.24	30.0201	30.0128	1807.2	-0.183391	11.1834	0
A654	F	11		147	43	1850	19.8991	1850	9.25	30.0648	30.0575	1469.7	-0.880219	11.8802	1
A655	F	11		154	45	1850	18.9745	1850	9.25	30.0648	30.0575	1627.2	-0.555032	11.555	1
A656	F	11		147	43	1850	19.8991	1850	9.25	30.0648	30.0575	1469.7	-0.880219	11.8802	1
A657	F	11		154	45	1850	18.9745	1850	9.25	30.0648	30.0575	1627.2	-0.555032	11.555	1
A658	F	11		154	45	1850	18.9745	1850	9.25	30.0648	30.0575	1627.2	-0.555032	11.555	1
A659	F	11		144	33.9	1851	16.3484	1851	9.255	30.0872	30.0799	1402.2	-1.01958	12.0196	1
A660	F	11		140	31	1851	15.8163	1851	9.255	30.0872	30.0799	1312.2	-1.2054	12.2054	1
A661	F	11		144	33.9	1851	16.3484	1851	9.255	30.0872	30.0799	1402.2	-1.01958	12.0196	1
A662	F	11		140	31	1851	15.8163	1851	9.255	30.0872	30.0799	1312.2	-1.2054	12.2054	1
A663	F	11		144	33.9	1851	16.3484	1851	9.255	30.0872	30.0799	1402.2	-1.01958	12.0196	1
A664	F	11		140	31	1851	15.8163	1851	9.255	30.0872	30.0799	1312.2	-1.2054	12.2054	1
A665	F	11		149.5	41.5	1852	18.568	1852	9.26	30.1095	30.1022	1525.95	-0.764081	11.7641	1
A666	F	11		149.5	41.5	1852	18.568	1852	9.26	30.1095	30.1022	1525.95	-0.764081	11.7641	1
A667	F	11		149.5	41.5	1852	18.568	1852	9.26	30.1095	30.1022	1525.95	-0.764081	11.7641	1
A668	F	11		150	34	1855	15.1111	1855	9.275	30.1766	30.1693	1537.2	-0.740853	11.7409	1
A669	F	11		153	41	1855	17.5146	1855	9.275	30.1766	30.1693	1604.7	-0.601487	11.6015	1
A670	F	11		150	34	1855	15.1111	1855	9.275	30.1766	30.1693	1537.2	-0.740853	11.7409	1
A671	F	11		153	41	1855	17.5146	1855	9.275	30.1766	30.1693	1604.7	-0.601487	11.6015	1
A672	F	11		153	41	1855	17.5146	1855	9.275	30.1766	30.1693	1604.7	-0.601487	11.6015	1
A673	F	11		150	34	1855	15.1111	1855	9.275	30.1766	30.1693	1537.2	-0.740853	11.7409	1
A674	F	11		152.5	52.5	1856	22.5746	1856	9.28	30.1989	30.1916	1593.45	-0.624715	11.6247	1
A675	F	11		152.5	52.5	1856	22.5746	1856	9.28	30.1989	30.1916	1593.45	-0.624715	11.6247	1
A676	F	11		152.5	52.5	1856	22.5746	1856	9.28	30.1989	30.1916	1593.45	-0.624715	11.6247	1
A677	F	11		143	45	1856.73	22.006	1856.73	9.28367	30.2153	30.208	1379.7	-1.06604	12.066	1
A678	F	11		144	33	1860	15.9144	1860	9.3	30.2883	30.281	1402.2	-1.01958	12.0196	1
A679	F	11		144	33	1860	15.9144	1860	9.3	30.2883	30.281	1402.2	-1.01958	12.0196	1
A680	F	11		154	50	1860	21.0828	1860	9.3	30.2883	30.281	1627.2	-0.555032	11.555	1
A681	F	11		153	45.8	1860	19.5651	1860	9.3	30.2883	30.281	1604.7	-0.601487	11.6015	1
A682	F	11		144	33	1860	15.9144	1860	9.3	30.2883	30.281	1402.2	-1.01958	12.0196	1
A683	F	11		154	41.6	1864	17.5409	1864	9.32	30.3777	30.3704	1627.2	-0.555032	11.555	1
A684	F	11		154	41.6	1864	17.5409	1864	9.32	30.3777	30.3704	1627.2	-0.555032	11.555	1
A685	F	11		154	41.6	1864	17.5409	1864	9.32	30.3777	30.3704	1627.2	-0.555032	11.555	1
A686	F	11		150	40	1865	17.9556	1865	9.325	30.4001	30.3928	1537.2	-0.740853	11.7409	1
A687	F	11		150	40	1865	17.9556	1865	9.325	30.4001	30.3928	1537.2	-0.740853	11.7409	1
A688	F	11		155	35	1867.44	14.5682	1867.44	9.33718	30.4545	30.4472	1649.7	-0.508577	11.5086	1
A689	F	11		147	41.2	1870	19.0661	1870	9.35	30.5118	30.5045	1469.7	-0.880219	11.8802	1
A690	F	11		153	38	1870	16.2331	1870	9.35	30.5118	30.5045	1604.7	-0.601487	11.6015	1
A691	F	11		147	41.2	1870	19.0661	1870	9.35	30.5118	30.5045	1469.7	-0.880219	11.8802	1
A692	F	11		153	38	1870	16.2331	1870	9.35	30.5118	30.5045	1604.7	-0.601487	11.6015	1
A693	F	11		153	38	1870	16.2331	1870	9.35	30.5118	30.5045	1604.7	-0.601487	11.6015	1
A694	F	11		147	41.2	1870	19.0661	1870	9.35	30.5118	30.5045	1469.7	-0.880219	11.8802	1
A695	F	11		147.5	29	1871	13.3295	1871	9.355	30.5342	30.5269	1480.95	-0.856991	11.857	1
A696	F	11		147.5	29	1871	13.3295	1871	9.355	30.5342	30.5269	1480.95	-0.856991	11.857	1
A697	F	11		138	43	1874	22.5793	1874	9.37	30.6013	30.5939	1267.2	-1.29832	12.2983	1
A698	F	11		138	43	1874	22.5793	1874	9.37	30.6013	30.5939	1267.2	-1.29832	12.2983	1
A699	F	11		138	43	1874	22.5793	1874	9.37	30.6013	30.5939	1267.2	-1.29832	12.2983	1
A700	F	11		144	42	1878.26	20.2546	1878.26	9.3913	30.6965	30.6891	1402.2	-1.01958	12.0196	1
A701	F	11		152	60	1881	26.1427	1881	9.405	30.7577	30.7504	1582.2	-0.647943	11.6479	1
A702	F	11		152	60	1881	26.1427	1881	9.405	30.7577	30.7504	1582.2	-0.647943	11.6479	1
A703	F	11		143	39	1885	19.0718	1885	9.425	30.8471	30.8398	1379.7	-1.06604	12.066	1
A704	F	11		143	39	1885	19.0718	1885	9.425	30.8471	30.8398	1379.7	-1.06604	12.066	1
A705	F	11		143	39	1885	19.0718	1885	9.425	30.8471	30.8398	1379.7	-1.06604	12.066	1
A706	F	11		162	41	1887	15.6226	1887	9.435	30.8918	30.8845	1807.2	-0.183391	11.1834	0
A707	F	11		162	41	1887	15.6226	1887	9.435	30.8918	30.8845	1807.2	-0.183391	11.1834	0
A708	F	11		162	41	1887	15.6226	1887	9.435	30.8918	30.8845	1807.2	-0.183391	11.1834	0
A709	F	11		156	49	1888	20.1348	1888	9.44	30.9142	30.9068	1672.2	-0.462122	11.4621	0
A710	F	11		156	49	1888	20.1348	1888	9.44	30.9142	30.9068	1672.2	-0.462122	11.4621	0
A711	F	11		156	49	1888	20.1348	1888	9.44	30.9142	30.9068	1672.2	-0.462122	11.4621	0
A712	F	11		142	42	1890	20.8292	1890	9.45	30.9589	30.9515	1357.2	-1.11249	12.1125	1
A713	F	11		145	37.3	1890	17.7408	1890	9.45	30.9589	30.9515	1424.7	-0.973129	11.9731	1
A714	F	11		146	41	1890	19.2344	1890	9.45	30.9589	30.9515	1447.2	-0.926674	11.9267	1
A715	F	11		146	45	1890	21.1109	1890	9.45	30.9589	30.9515	1447.2	-0.926674	11.9267	1
A716	F	11		149	45	1890	20.2694	1890	9.45	30.9589	30.9515	1514.7	-0.787308	11.7873	1
A717	F	11		150	37	1890	16.4444	1890	9.45	30.9589	30.9515	1537.2	-0.740853	11.7409	1
A718	F	11		162	55	1890	20.9572	1890	9.45	30.9589	30.9515	1807.2	-0.183391	11.1834	0
A719	F	11		167	52	1890	18.6453	1890	9.45	30.9589	30.9515	1919.7	0.0488854	10.9511	0
A720	F	11		142	42	1890	20.8292	1890	9.45	30.9589	30.9515	1357.2	-1.11249	12.1125	1
A721	F	11		145	37.3	1890	17.7408	1890	9.45	30.9589	30.9515	1424.7	-0.973129	11.9731	1
A722	F	11		146	41	1890	19.2344	1890	9.45	30.9589	30.9515	1447.2	-0.926674	11.9267	1
A723	F	11		146	45	1890	21.1109	1890	9.45	30.9589	30.9515	1447.2	-0.926674	11.9267	1
A724	F	11		149	45	1890	20.2694	1890	9.45	30.9589	30.9515	1514.7	-0.787308	11.7873	1
A725	F	11		150	37	1890	16.4444	1890	9.45	30.9589	30.9515	1537.2	-0.740853	11.7409	1
A726	F	11		162	55	1890	20.9572	1890	9.45	30.9589	30.9515	1807.2	-0.183391	11.1834	0
A727	F	11		167	52	1890	18.6453	1890	9.45	30.9589	30.9515	1919.7	0.0488854	10.9511	0
A728	F	11		162	55	1890	20.9572	1890	9.45	30.9589	30.9515	1807.2	-0.183391	11.1834	0
A729	F	11		167	52	1890	18.6453	1890	9.45	30.9589	30.9515	1919.7	0.0488854	10.9511	0
A730	F	11		146	41	1890	19.2344	1890	9.45	30.9589	30.9515	1447.2	-0.926674	11.9267	1
A731	F	11		142	42	1890	20.8292	1890	9.45	30.9589	30.9515	1357.2	-1.11249	12.1125	1
A732	F	11		150	37	1890	16.4444	1890	9.45	30.9589	30.9515	1537.2	-0.740853	11.7409	1
A733	F	11		149	45	1890	20.2694	1890	9.45	30.9589	30.9515	1514.7	-0.787308	11.7873	1
A734	F	11		145	37.3	1890	17.7408	1890	9.45	30.9589	30.9515	1424.7	-0.973129	11.9731	1
A735	F	11		138	33	1890	17.3283	1890	9.45	30.9589	30.9515	1267.2	-1.29832	12.2983	1
A736	F	11		155	42	1890	17.4818	1890	9.45	30.9589	30.9515	1649.7	-0.508577	11.5086	1
A737	F	11		133	27.9	1891	15.7725	1891	9.455	30.9812	30.9739	1154.7	-1.53059	12.5306	2
A738	F	11		133	27.9	1891	15.7725	1891	9.455	30.9812	30.9739	1154.7	-1.53059	12.5306	2
A739	F	11		149	35	1894.74	15.7651	1894.74	9.47368	31.0647	31.0574	1514.7	-0.787308	11.7873	1
A740	F	11		158	42.1	1896	16.8643	1896	9.48	31.093	31.0856	1717.2	-0.369211	11.3692	0
A741	F	11		158	42.1	1896	16.8643	1896	9.48	31.093	31.0856	1717.2	-0.369211	11.3692	0
A742	F	11		158	42.1	1896	16.8643	1896	9.48	31.093	31.0856	1717.2	-0.369211	11.3692	0
A743	F	11		139	35	1898	18.115	1898	9.49	31.1377	31.1303	1289.7	-1.25186	12.2519	1
A744	F	11		139	35	1898	18.115	1898	9.49	31.1377	31.1303	1289.7	-1.25186	12.2519	1
A745	F	11		139	35	1898	18.115	1898	9.49	31.1377	31.1303	1289.7	-1.25186	12.2519	1
A746	F	11		153	36	1899	15.3787	1899	9.495	31.16	31.1527	1604.7	-0.601487	11.6015	1
A747	F	11		153	36	1899	15.3787	1899	9.495	31.16	31.1527	1604.7	-0.601487	11.6015	1
A748	F	11		153	36	1899	15.3787	1899	9.495	31.16	31.1527	1604.7	-0.601487	11.6015	1
A749	F	11		143	35	1900	17.0179	1900	9.5	31.1824	31.175	1379.7	-1.06604	12.066	1
A750	F	11		147	40	1900	18.3257	1900	9.5	31.1824	31.175	1469.7	-0.880219	11.8802	1
A751	F	11		160	63	1900	24.6094	1900	9.5	31.1824	31.175	1762.2	-0.276301	11.2763	0
A752	F	11		143	35	1900	17.0179	1900	9.5	31.1824	31.175	1379.7	-1.06604	12.066	1
A753	F	11		147	40	1900	18.3257	1900	9.5	31.1824	31.175	1469.7	-0.880219	11.8802	1
A754	F	11		160	63	1900	24.6094	1900	9.5	31.1824	31.175	1762.2	-0.276301	11.2763	0
A755	F	11		149	48	1900.29	21.6206	1900.29	9.50147	31.1889	31.1816	1514.7	-0.787308	11.7873	1
A756	F	11		151	44	1911.5	19.2974	1911.5	9.55752	31.4395	31.4321	1559.7	-0.694398	11.6944	1
A757	F	11		142	39	1911.5	19.3414	1911.5	9.55752	31.4395	31.4321	1357.2	-1.11249	12.1125	1
A758	F	11		157	36.2	1917	14.6862	1917	9.585	31.5624	31.555	1694.7	-0.415667	11.4157	0
A759	F	11		157	36.2	1917	14.6862	1917	9.585	31.5624	31.555	1694.7	-0.415667	11.4157	0
A760	F	11		143	36	1917.16	17.6048	1917.16	9.5858	31.5659	31.5585	1379.7	-1.06604	12.066	1
A761	F	11		144	36	1918	17.2164	1918	9.59	31.5847	31.5773	1402.2	-1.01958	12.0196	1
A762	F	11		144	36	1918	17.2164	1918	9.59	31.5847	31.5773	1402.2	-1.01958	12.0196	1
A763	F	11		140	36.9	1920	18.8265	1920	9.6	31.6294	31.622	1312.2	-1.2054	12.2054	1
A764	F	11		140	31	1920	15.8163	1920	9.6	31.6294	31.622	1312.2	-1.2054	12.2054	1
A765	F	11		144	32	1920	15.4321	1920	9.6	31.6294	31.622	1402.2	-1.01958	12.0196	1
A766	F	11		148	39	1920	17.805	1920	9.6	31.6294	31.622	1492.2	-0.833763	11.8338	1
A767	F	11		150	40	1920	17.7778	1920	9.6	31.6294	31.622	1537.2	-0.740853	11.7409	1
A768	F	11		155	34	1920	14.1519	1920	9.6	31.6294	31.622	1649.7	-0.508577	11.5086	1
A769	F	11		140	36.9	1920	18.8265	1920	9.6	31.6294	31.622	1312.2	-1.2054	12.2054	1
A770	F	11		140	31	1920	15.8163	1920	9.6	31.6294	31.622	1312.2	-1.2054	12.2054	1
A771	F	11		144	32	1920	15.4321	1920	9.6	31.6294	31.622	1402.2	-1.01958	12.0196	1
A772	F	11		148	39	1920	17.805	1920	9.6	31.6294	31.622	1492.2	-0.833763	11.8338	1
A773	F	11		150	40	1920	17.7778	1920	9.6	31.6294	31.622	1537.2	-0.740853	11.7409	1
A774	F	11		133.5	28	1920	15.7107	1920	9.6	31.6294	31.622	1165.95	-1.50736	12.5074	2
A775	F	11		152	44	1920	19.0443	1920	9.6	31.6294	31.622	1582.2	-0.647943	11.6479	1
A776	F	11		150	40	1920	17.7778	1920	9.6	31.6294	31.622	1537.2	-0.740853	11.7409	1
A777	F	11		140	36.9	1920	18.8265	1920	9.6	31.6294	31.622	1312.2	-1.2054	12.2054	1
A778	F	11		155	34	1920	14.1519	1920	9.6	31.6294	31.622	1649.7	-0.508577	11.5086	1
A779	F	11		146	36	1920	16.8887	1920	9.6	31.6294	31.622	1447.2	-0.926674	11.9267	1
A780	F	11		140	31	1920	15.8163	1920	9.6	31.6294	31.622	1312.2	-1.2054	12.2054	1
A781	F	11		148	39	1920	17.805	1920	9.6	31.6294	31.622	1492.2	-0.833763	11.8338	1
A782	F	11		144	32	1920	15.4321	1920	9.6	31.6294	31.622	1402.2	-1.01958	12.0196	1
A783	F	11		132	25.75	1930	14.7785	1930	9.65	31.8529	31.8455	1132.2	-1.57705	12.577	2
A784	F	11		153	46	1930	19.6506	1930	9.65	31.8529	31.8455	1604.7	-0.601487	11.6015	1
A785	F	11		143	45	1934	22.006	1934	9.67	31.9423	31.9349	1379.7	-1.06604	12.066	1
A786	F	11		143	45	1934	22.006	1934	9.67	31.9423	31.9349	1379.7	-1.06604	12.066	1
A787	F	11		143	45	1934	22.006	1934	9.67	31.9423	31.9349	1379.7	-1.06604	12.066	1
A788	F	11		151	38	1934.33	16.6659	1934.33	9.67164	31.9497	31.9422	1559.7	-0.694398	11.6944	1
A789	F	11		143	33.5	1944	16.3822	1944	9.72	32.1658	32.1584	1379.7	-1.06604	12.066	1
A790	F	11		140	37	1944	18.8776	1944	9.72	32.1658	32.1584	1312.2	-1.2054	12.2054	1
A791	F	11		141	37	1944	18.6107	1944	9.72	32.1658	32.1584	1334.7	-1.15895	12.1589	1
A792	F	11		142	42	1944	20.8292	1944	9.72	32.1658	32.1584	1357.2	-1.11249	12.1125	1
A793	F	11		149	39	1944	17.5668	1944	9.72	32.1658	32.1584	1514.7	-0.787308	11.7873	1
A794	F	11		152	42.3	1944	18.3085	1944	9.72	32.1658	32.1584	1582.2	-0.647943	11.6479	1
A795	F	11		156	52	1944	21.3675	1944	9.72	32.1658	32.1584	1672.2	-0.462122	11.4621	0
A796	F	11		143	33.5	1944	16.3822	1944	9.72	32.1658	32.1584	1379.7	-1.06604	12.066	1
A797	F	11		140	37	1944	18.8776	1944	9.72	32.1658	32.1584	1312.2	-1.2054	12.2054	1
A798	F	11		141	37	1944	18.6107	1944	9.72	32.1658	32.1584	1334.7	-1.15895	12.1589	1
A799	F	11		142	42	1944	20.8292	1944	9.72	32.1658	32.1584	1357.2	-1.11249	12.1125	1
A800	F	11		149	39	1944	17.5668	1944	9.72	32.1658	32.1584	1514.7	-0.787308	11.7873	1
A801	F	11		152	42.3	1944	18.3085	1944	9.72	32.1658	32.1584	1582.2	-0.647943	11.6479	1
A802	F	11		156	52	1944	21.3675	1944	9.72	32.1658	32.1584	1672.2	-0.462122	11.4621	0
A803	F	11		156	52	1944	21.3675	1944	9.72	32.1658	32.1584	1672.2	-0.462122	11.4621	0
A804	F	11		141	37	1944	18.6107	1944	9.72	32.1658	32.1584	1334.7	-1.15895	12.1589	1
A805	F	11		142	42	1944	20.8292	1944	9.72	32.1658	32.1584	1357.2	-1.11249	12.1125	1
A806	F	11		140	37	1944	18.8776	1944	9.72	32.1658	32.1584	1312.2	-1.2054	12.2054	1
A807	F	11		152	42.3	1944	18.3085	1944	9.72	32.1658	32.1584	1582.2	-0.647943	11.6479	1
A808	F	11		143	33.5	1944	16.3822	1944	9.72	32.1658	32.1584	1379.7	-1.06604	12.066	1
A809	F	11		147	32	1945	14.8086	1945	9.725	32.1882	32.1808	1469.7	-0.880219	11.8802	1
A810	F	11		147	32	1945	14.8086	1945	9.725	32.1882	32.1808	1469.7	-0.880219	11.8802	1
A811	F	11		155	56	1949	23.1842	1949	9.745	32.2776	32.2702	1649.7	-0.508577	11.5086	1
A812	F	11		150	33	1949	14.6667	1949	9.745	32.2776	32.2702	1537.2	-0.740853	11.7409	1
A813	F	11		155	56	1949	23.1842	1949	9.745	32.2776	32.2702	1649.7	-0.508577	11.5086	1
A814	F	11		150	33	1949	14.6667	1949	9.745	32.2776	32.2702	1537.2	-0.740853	11.7409	1
A815	F	11		137	38.1	1950	20.2994	1950	9.75	32.3	32.2925	1244.7	-1.34477	12.3448	1
A816	F	11		147	43	1950	19.8991	1950	9.75	32.3	32.2925	1469.7	-0.880219	11.8802	1
A817	F	11		147	38.6	1950	17.8629	1950	9.75	32.3	32.2925	1469.7	-0.880219	11.8802	1
A818	F	11		150	47.8	1950	21.2444	1950	9.75	32.3	32.2925	1537.2	-0.740853	11.7409	1
A819	F	11		152	40	1950	17.313	1950	9.75	32.3	32.2925	1582.2	-0.647943	11.6479	1
A820	F	11		155	57.4	1950	23.8918	1950	9.75	32.3	32.2925	1649.7	-0.508577	11.5086	1
A821	F	11		154	63.7	1950	26.8595	1950	9.75	32.3	32.2925	1627.2	-0.555032	11.555	1
A822	F	11		137	38.1	1950	20.2994	1950	9.75	32.3	32.2925	1244.7	-1.34477	12.3448	1
A823	F	11		147	43	1950	19.8991	1950	9.75	32.3	32.2925	1469.7	-0.880219	11.8802	1
A824	F	11		147	38.6	1950	17.8629	1950	9.75	32.3	32.2925	1469.7	-0.880219	11.8802	1
A825	F	11		150	47.8	1950	21.2444	1950	9.75	32.3	32.2925	1537.2	-0.740853	11.7409	1
A826	F	11		152	40	1950	17.313	1950	9.75	32.3	32.2925	1582.2	-0.647943	11.6479	1
A827	F	11		155	57.4	1950	23.8918	1950	9.75	32.3	32.2925	1649.7	-0.508577	11.5086	1
A828	F	11		147	44	1950	20.3619	1950	9.75	32.3	32.2925	1469.7	-0.880219	11.8802	1
A829	F	11		152	40	1950	17.313	1950	9.75	32.3	32.2925	1582.2	-0.647943	11.6479	1
A830	F	11		154	63.7	1950	26.8595	1950	9.75	32.3	32.2925	1627.2	-0.555032	11.555	1
A831	F	11		147	38.6	1950	17.8629	1950	9.75	32.3	32.2925	1469.7	-0.880219	11.8802	1
A832	F	11		155	57.4	1950	23.8918	1950	9.75	32.3	32.2925	1649.7	-0.508577	11.5086	1
A833	F	11		150	47.8	1950	21.2444	1950	9.75	32.3	32.2925	1537.2	-0.740853	11.7409	1
A834	F	11		147	43	1950	19.8991	1950	9.75	32.3	32.2925	1469.7	-0.880219	11.8802	1
A835	F	11		137	38.1	1950	20.2994	1950	9.75	32.3	32.2925	1244.7	-1.34477	12.3448	1
A836	F	11		138	28	1951.81	14.7028	1951.81	9.75904	32.3403	32.3329	1267.2	-1.29832	12.2983	1
A837	F	11		149	41	1951.81	18.4676	1951.81	9.75904	32.3403	32.3329	1514.7	-0.787308	11.7873	1
A838	F	11		146	35	1955	16.3258	1955	9.775	32.4117	32.4043	1447.2	-0.926674	11.9267	1
A839	F	11		146	35	1955	16.3258	1955	9.775	32.4117	32.4043	1447.2	-0.926674	11.9267	1
A840	F	11		140	34	1957.7	17.3469	1957.7	9.78852	32.4721	32.4647	1312.2	-1.2054	12.2054	1
A841	F	11		145	40	1959	18.9774	1959	9.795	32.5011	32.4937	1424.7	-0.973129	11.9731	1
A842	F	11		145	40	1959	18.9774	1959	9.795	32.5011	32.4937	1424.7	-0.973129	11.9731	1
A843	F	11		146	43.3	1960	20.3134	1960	9.8	32.5235	32.516	1447.2	-0.926674	11.9267	1
A844	F	11		146	33	1960	15.4813	1960	9.8	32.5235	32.516	1447.2	-0.926674	11.9267	1
A845	F	11		147	38	1960	17.5853	1960	9.8	32.5235	32.516	1469.7	-0.880219	11.8802	1
A846	F	11		152	42	1960	18.1787	1960	9.8	32.5235	32.516	1582.2	-0.647943	11.6479	1
A847	F	11		146	43.3	1960	20.3134	1960	9.8	32.5235	32.516	1447.2	-0.926674	11.9267	1
A848	F	11		146	33	1960	15.4813	1960	9.8	32.5235	32.516	1447.2	-0.926674	11.9267	1
A849	F	11		147	38	1960	17.5853	1960	9.8	32.5235	32.516	1469.7	-0.880219	11.8802	1
A850	F	11		152	42	1960	18.1787	1960	9.8	32.5235	32.516	1582.2	-0.647943	11.6479	1
A851	F	11		146	43.3	1960	20.3134	1960	9.8	32.5235	32.516	1447.2	-0.926674	11.9267	1
A852	F	11		152	42	1960	18.1787	1960	9.8	32.5235	32.516	1582.2	-0.647943	11.6479	1
A853	F	11		147	38	1960	17.5853	1960	9.8	32.5235	32.516	1469.7	-0.880219	11.8802	1
A854	F	11		146	33	1960	15.4813	1960	9.8	32.5235	32.516	1447.2	-0.926674	11.9267	1
A855	F	11		150	37	1960	16.4444	1960	9.8	32.5235	32.516	1537.2	-0.740853	11.7409	1
A856	F	11		156	50	1960	20.5457	1960	9.8	32.5235	32.516	1672.2	-0.462122	11.4621	0
A857	F	11		143	31	1963.64	15.1597	1963.64	9.81818	32.6047	32.5973	1379.7	-1.06604	12.066	1
A858	F	11		151	36	1963.64	15.7888	1963.64	9.81818	32.6047	32.5973	1559.7	-0.694398	11.6944	1
A859	F	11		139	35	1963.64	18.115	1963.64	9.81818	32.6047	32.5973	1289.7	-1.25186	12.2519	1
A860	F	11		145	39	1965	18.5493	1965	9.825	32.6352	32.6278	1424.7	-0.973129	11.9731	1
A861	F	11		159	47	1965	18.591	1965	9.825	32.6352	32.6278	1739.7	-0.322756	11.3228	0
A862	F	11		145	39	1965	18.5493	1965	9.825	32.6352	32.6278	1424.7	-0.973129	11.9731	1
A863	F	11		159	47	1965	18.591	1965	9.825	32.6352	32.6278	1739.7	-0.322756	11.3228	0
A864	F	11		145	39	1965	18.5493	1965	9.825	32.6352	32.6278	1424.7	-0.973129	11.9731	1
A865	F	11		159	47	1965	18.591	1965	9.825	32.6352	32.6278	1739.7	-0.322756	11.3228	0
A866	F	11		152	39	1968	16.8802	1968	9.84	32.7023	32.6948	1582.2	-0.647943	11.6479	1
A867	F	11		152	39	1968	16.8802	1968	9.84	32.7023	32.6948	1582.2	-0.647943	11.6479	1
A868	F	11		152	39	1968	16.8802	1968	9.84	32.7023	32.6948	1582.2	-0.647943	11.6479	1
A869	F	11		133	30	1970	16.9597	1970	9.85	32.747	32.7395	1154.7	-1.53059	12.5306	2
A870	F	11		133	30	1970	16.9597	1970	9.85	32.747	32.7395	1154.7	-1.53059	12.5306	2
A871	F	11		133	30	1970	16.9597	1970	9.85	32.747	32.7395	1154.7	-1.53059	12.5306	2
A872	F	11		141	33.2	1971	16.6994	1971	9.855	32.7693	32.7619	1334.7	-1.15895	12.1589	1
A873	F	11		148	37.2	1971	16.9832	1971	9.855	32.7693	32.7619	1492.2	-0.833763	11.8338	1
A874	F	11		154	47	1971	19.8178	1971	9.855	32.7693	32.7619	1627.2	-0.555032	11.555	1
A875	F	11		162	39.5	1971	15.0511	1971	9.855	32.7693	32.7619	1807.2	-0.183391	11.1834	0
A876	F	11		141	33.2	1971	16.6994	1971	9.855	32.7693	32.7619	1334.7	-1.15895	12.1589	1
A877	F	11		148	37.2	1971	16.9832	1971	9.855	32.7693	32.7619	1492.2	-0.833763	11.8338	1
A878	F	11		154	47	1971	19.8178	1971	9.855	32.7693	32.7619	1627.2	-0.555032	11.555	1
A879	F	11		162	39.5	1971	15.0511	1971	9.855	32.7693	32.7619	1807.2	-0.183391	11.1834	0
A880	F	11		162	39.5	1971	15.0511	1971	9.855	32.7693	32.7619	1807.2	-0.183391	11.1834	0
A881	F	11		154	47	1971	19.8178	1971	9.855	32.7693	32.7619	1627.2	-0.555032	11.555	1
A882	F	11		148	37.2	1971	16.9832	1971	9.855	32.7693	32.7619	1492.2	-0.833763	11.8338	1
A883	F	11		141	33.2	1971	16.6994	1971	9.855	32.7693	32.7619	1334.7	-1.15895	12.1589	1
A884	F	11		147	33	1975.61	15.2714	1975.61	9.87805	32.8724	32.8649	1469.7	-0.880219	11.8802	1
A885	F	11		148	36	1976	16.4354	1976	9.88	32.8811	32.8736	1492.2	-0.833763	11.8338	1
A886	F	11		148	36	1976	16.4354	1976	9.88	32.8811	32.8736	1492.2	-0.833763	11.8338	1
A887	F	11		148	36	1976	16.4354	1976	9.88	32.8811	32.8736	1492.2	-0.833763	11.8338	1
A888	F	11		141	36.8	1980	18.5101	1980	9.9	32.9705	32.963	1334.7	-1.15895	12.1589	1
A889	F	11		141	36.8	1980	18.5101	1980	9.9	32.9705	32.963	1334.7	-1.15895	12.1589	1
A890	F	11		142.5	34.5	1980	16.9898	1980	9.9	32.9705	32.963	1368.45	-1.08927	12.0893	1
A891	F	11		141	36.8	1980	18.5101	1980	9.9	32.9705	32.963	1334.7	-1.15895	12.1589	1
A892	F	11		158	45	1981	18.026	1981	9.905	32.9928	32.9854	1717.2	-0.369211	11.3692	0
A893	F	11		158	45	1981	18.026	1981	9.905	32.9928	32.9854	1717.2	-0.369211	11.3692	0
A894	F	11		158	45	1981	18.026	1981	9.905	32.9928	32.9854	1717.2	-0.369211	11.3692	0
A895	F	11		146	38	1984	17.827	1984	9.92	33.0599	33.0524	1447.2	-0.926674	11.9267	1
A896	F	11		146	38	1984	17.827	1984	9.92	33.0599	33.0524	1447.2	-0.926674	11.9267	1
A897	F	11		146	38	1984	17.827	1984	9.92	33.0599	33.0524	1447.2	-0.926674	11.9267	1
A898	F	11		139	32	1990	16.7176	1990	9.95	33.194	33.1865	1289.7	-1.25186	12.2519	1
A899	F	11		139	32	1990	16.7176	1990	9.95	33.194	33.1865	1289.7	-1.25186	12.2519	1
A900	F	11		147	36	1992	16.6597	1992	9.96	33.2387	33.2312	1469.7	-0.880219	11.8802	1
A901	F	11		147	36	1992	16.6597	1992	9.96	33.2387	33.2312	1469.7	-0.880219	11.8802	1
A902	F	11		147	36	1992	16.6597	1992	9.96	33.2387	33.2312	1469.7	-0.880219	11.8802	1
A903	F	11		165	45	1993.85	16.5289	1993.85	9.96923	33.28	33.2725	1874.7	-0.044025	11.044	0
A904	F	11		147	37	1993.85	17.1225	1993.85	9.96923	33.28	33.2725	1469.7	-0.880219	11.8802	1
A905	F	11		149	47.8	1998	21.5306	1998	9.99	33.3728	33.3653	1514.7	-0.787308	11.7873	1
A906	F	11		155	47	1998	19.563	1998	9.99	33.3728	33.3653	1649.7	-0.508577	11.5086	1
A907	F	11		157	39.2	1998	15.9033	1998	9.99	33.3728	33.3653	1694.7	-0.415667	11.4157	0
A908	F	11		149	47.8	1998	21.5306	1998	9.99	33.3728	33.3653	1514.7	-0.787308	11.7873	1
A909	F	11		155	47	1998	19.563	1998	9.99	33.3728	33.3653	1649.7	-0.508577	11.5086	1
A910	F	11		157	39.2	1998	15.9033	1998	9.99	33.3728	33.3653	1694.7	-0.415667	11.4157	0
A911	F	11		155	47	1998	19.563	1998	9.99	33.3728	33.3653	1649.7	-0.508577	11.5086	1
A912	F	11		157	39.2	1998	15.9033	1998	9.99	33.3728	33.3653	1694.7	-0.415667	11.4157	0
A913	F	11		149	47.8	1998	21.5306	1998	9.99	33.3728	33.3653	1514.7	-0.787308	11.7873	1
A914	F	11		144	34	2000	16.3966	2000	10	33.4175	33.41	1402.2	-1.01958	12.0196	1
A915	F	11		153	40	2000	17.0874	2000	10	33.4175	33.41	1604.7	-0.601487	11.6015	1
A916	F	11		155	54	2000	22.4766	2000	10	33.4175	33.41	1649.7	-0.508577	11.5086	1
A917	F	11		163	65	2000	24.4646	2000	10	33.4175	33.41	1829.7	-0.136935	11.1369	0
A918	F	11		150	34.5	2000	15.3333	2000	10	33.4175	33.41	1537.2	-0.740853	11.7409	1
A919	F	11		144	34	2000	16.3966	2000	10	33.4175	33.41	1402.2	-1.01958	12.0196	1
A920	F	11		153	40	2000	17.0874	2000	10	33.4175	33.41	1604.7	-0.601487	11.6015	1
A921	F	11		155	54	2000	22.4766	2000	10	33.4175	33.41	1649.7	-0.508577	11.5086	1
A922	F	11		163	65	2000	24.4646	2000	10	33.4175	33.41	1829.7	-0.136935	11.1369	0
A923	F	11		150	34.5	2000	15.3333	2000	10	33.4175	33.41	1537.2	-0.740853	11.7409	1
A924	F	11		150	35	2000	15.5556	2000	10	33.4175	33.41	1537.2	-0.740853	11.7409	1
A925	F	11		146	38	2000	17.827	2000	10	33.4175	33.41	1447.2	-0.926674	11.9267	1
A926	F	11		150	34.5	2000	15.3333	2000	10	33.4175	33.41	1537.2	-0.740853	11.7409	1
A927	F	11		152	45	2000	19.4771	2000	10	33.4175	33.41	1582.2	-0.647943	11.6479	1
A928	F	11		156	45.3	2007	18.6144	2007	10.035	33.574	33.5665	1672.2	-0.462122	11.4621	0
A929	F	11		156	45.3	2007	18.6144	2007	10.035	33.574	33.5665	1672.2	-0.462122	11.4621	0
A930	F	11		156	45.3	2007	18.6144	2007	10.035	33.574	33.5665	1672.2	-0.462122	11.4621	0
A931	F	11		136	40	2010	21.6263	2010	10.05	33.641	33.6335	1222.2	-1.39123	12.3912	1
A932	F	11		155	38	2010	15.8169	2010	10.05	33.641	33.6335	1649.7	-0.508577	11.5086	1
A933	F	11		136	40	2010	21.6263	2010	10.05	33.641	33.6335	1222.2	-1.39123	12.3912	1
A934	F	11		155	38	2010	15.8169	2010	10.05	33.641	33.6335	1649.7	-0.508577	11.5086	1
A935	F	11		155	38	2010	15.8169	2010	10.05	33.641	33.6335	1649.7	-0.508577	11.5086	1
A936	F	11		136	40	2010	21.6263	2010	10.05	33.641	33.6335	1222.2	-1.39123	12.3912	1
A937	F	11		156	44.5	2013	18.2857	2013	10.065	33.7081	33.7005	1672.2	-0.462122	11.4621	0
A938	F	11		156	44.5	2013	18.2857	2013	10.065	33.7081	33.7005	1672.2	-0.462122	11.4621	0
A939	F	11		156	44.5	2013	18.2857	2013	10.065	33.7081	33.7005	1672.2	-0.462122	11.4621	0
A940	F	11		159.5	55.4	2014	21.7765	2014	10.07	33.7304	33.7229	1750.95	-0.299529	11.2995	0
A941	F	11		159.5	55.4	2014	21.7765	2014	10.07	33.7304	33.7229	1750.95	-0.299529	11.2995	0
A942	F	11		159.5	55.4	2014	21.7765	2014	10.07	33.7304	33.7229	1750.95	-0.299529	11.2995	0
A943	F	11		143	36	2020	17.507	2020	10.1	33.8646	33.857	1379.7	-1.06604	12.066	1
A944	F	11		143	32.8	2020	16.0399	2020	10.1	33.8646	33.857	1379.7	-1.06604	12.066	1
A945	F	11		143	36	2020	17.507	2020	10.1	33.8646	33.857	1379.7	-1.06604	12.066	1
A946	F	11		143	32.8	2020	16.0399	2020	10.1	33.8646	33.857	1379.7	-1.06604	12.066	1
A947	F	11		143	32.8	2020	16.0399	2020	10.1	33.8646	33.857	1379.7	-1.06604	12.066	1
A948	F	11		149	33.5	2025	15.0894	2025	10.125	33.9763	33.9688	1514.7	-0.787308	11.7873	1
A949	F	11		149	33.5	2025	15.0894	2025	10.125	33.9763	33.9688	1514.7	-0.787308	11.7873	1
A950	F	11		153	41	2025	17.5146	2025	10.125	33.9763	33.9688	1604.7	-0.601487	11.6015	1
A951	F	11		149	33.5	2025	15.0894	2025	10.125	33.9763	33.9688	1514.7	-0.787308	11.7873	1
A952	F	11		156	41	2030	16.8475	2030	10.15	34.0881	34.0805	1672.2	-0.462122	11.4621	0
A953	F	11		145	31.5	2037.74	14.9822	2037.74	10.1887	34.261	34.2534	1424.7	-0.973129	11.9731	1
A954	F	11		153	41.5	2039	17.7282	2039	10.195	34.2892	34.2817	1604.7	-0.601487	11.6015	1
A955	F	11		153	41.5	2039	17.7282	2039	10.195	34.2892	34.2817	1604.7	-0.601487	11.6015	1
A956	F	11		153	41.5	2039	17.7282	2039	10.195	34.2892	34.2817	1604.7	-0.601487	11.6015	1
A957	F	11		157	42	2040	16.9175	2040	10.2	34.3116	34.304	1694.7	-0.415667	11.4157	0
A958	F	11		157	42	2040	16.9175	2040	10.2	34.3116	34.304	1694.7	-0.415667	11.4157	0
A959	F	11		152.5	42	2040	18.0597	2040	10.2	34.3116	34.304	1593.45	-0.624715	11.6247	1
A960	F	11		155	40	2050	16.6493	2050	10.25	34.5351	34.5275	1649.7	-0.508577	11.5086	1
A961	F	11		141.5	38.55	2050	19.2536	2050	10.25	34.5351	34.5275	1345.95	-1.13572	12.1357	1
A962	F	11		157	57	2050	23.1247	2050	10.25	34.5351	34.5275	1694.7	-0.415667	11.4157	0
A963	F	11		155	40	2050	16.6493	2050	10.25	34.5351	34.5275	1649.7	-0.508577	11.5086	1
A964	F	11		141.5	38.55	2050	19.2536	2050	10.25	34.5351	34.5275	1345.95	-1.13572	12.1357	1
A965	F	11		157	57	2050	23.1247	2050	10.25	34.5351	34.5275	1694.7	-0.415667	11.4157	0
A966	F	11		141.5	38.55	2050	19.2536	2050	10.25	34.5351	34.5275	1345.95	-1.13572	12.1357	1
A967	F	11		157	57	2050	23.1247	2050	10.25	34.5351	34.5275	1694.7	-0.415667	11.4157	0
A968	F	11		147	38	2050.63	17.5853	2050.63	10.2532	34.5492	34.5416	1469.7	-0.880219	11.8802	1
A969	F	11		145	36.9	2052	17.5505	2052	10.26	34.5798	34.5722	1424.7	-0.973129	11.9731	1
A970	F	11		148	36.8	2052	16.8006	2052	10.26	34.5798	34.5722	1492.2	-0.833763	11.8338	1
A971	F	11		145	36.9	2052	17.5505	2052	10.26	34.5798	34.5722	1424.7	-0.973129	11.9731	1
A972	F	11		148	36.8	2052	16.8006	2052	10.26	34.5798	34.5722	1492.2	-0.833763	11.8338	1
A973	F	11		151	39	2052	17.1045	2052	10.26	34.5798	34.5722	1559.7	-0.694398	11.6944	1
A974	F	11		148	36.8	2052	16.8006	2052	10.26	34.5798	34.5722	1492.2	-0.833763	11.8338	1
A975	F	11		145	36.9	2052	17.5505	2052	10.26	34.5798	34.5722	1424.7	-0.973129	11.9731	1
A976	F	11		154	48.7	2057	20.5347	2057	10.285	34.6916	34.684	1627.2	-0.555032	11.555	1
A977	F	11		154	48.7	2057	20.5347	2057	10.285	34.6916	34.684	1627.2	-0.555032	11.555	1
A978	F	11		154	48.7	2057	20.5347	2057	10.285	34.6916	34.684	1627.2	-0.555032	11.555	1
A979	F	11		154	38	2057.14	16.0229	2057.14	10.2857	34.6947	34.6871	1627.2	-0.555032	11.555	1
A980	F	11		151	40	2058	17.6308	2058	10.29	34.7139	34.7063	1559.7	-0.694398	11.6944	1
A981	F	11		151	40	2058	17.6308	2058	10.29	34.7139	34.7063	1559.7	-0.694398	11.6944	1
A982	F	11		149	40	2064	18.0172	2064	10.32	34.848	34.8404	1514.7	-0.787308	11.7873	1
A983	F	11		149	40	2064	18.0172	2064	10.32	34.848	34.8404	1514.7	-0.787308	11.7873	1
A984	F	11		149	40	2064	18.0172	2064	10.32	34.848	34.8404	1514.7	-0.787308	11.7873	1
A985	F	11		165	40	2065	14.6924	2065	10.325	34.8704	34.8628	1874.7	-0.044025	11.044	0
A986	F	11		165	40	2065	14.6924	2065	10.325	34.8704	34.8628	1874.7	-0.044025	11.044	0
A987	F	11		146	43	2068	20.1726	2068	10.34	34.9374	34.9298	1447.2	-0.926674	11.9267	1
A988	F	11		146	43	2068	20.1726	2068	10.34	34.9374	34.9298	1447.2	-0.926674	11.9267	1
A989	F	11		146	43	2068	20.1726	2068	10.34	34.9374	34.9298	1447.2	-0.926674	11.9267	1
A990	F	11		150	38	2070.29	16.8889	2070.29	10.3514	34.9885	34.9809	1537.2	-0.740853	11.7409	1
A991	F	11		146	46	2076	21.58	2076	10.38	35.1162	35.1086	1447.2	-0.926674	11.9267	1
A992	F	11		166	46	2076.92	16.6933	2076.92	10.3846	35.1369	35.1292	1897.2	0.0024302	10.9976	0
A993	F	11		149	39	2076.92	17.5668	2076.92	10.3846	35.1369	35.1292	1514.7	-0.787308	11.7873	1
A994	F	11		144	34.2	2077	16.4931	2077	10.385	35.1386	35.131	1402.2	-1.01958	12.0196	1
A995	F	11		144	34.2	2077	16.4931	2077	10.385	35.1386	35.131	1402.2	-1.01958	12.0196	1
A996	F	11		144	34.2	2077	16.4931	2077	10.385	35.1386	35.131	1402.2	-1.01958	12.0196	1
A997	F	11		152	40	2080	17.313	2080	10.4	35.2056	35.198	1582.2	-0.647943	11.6479	1
A998	F	11		141	30.5	2083.6	15.3413	2083.6	10.418	35.2861	35.2785	1334.7	-1.15895	12.1589	1
A999	F	11		148	41.5	2090.32	18.9463	2090.32	10.4516	35.4364	35.4287	1492.2	-0.833763	11.8338	1
A1000	F	11		157	40	2099	16.2278	2099	10.495	35.6303	35.6227	1694.7	-0.415667	11.4157	0
A1001	F	11		157	40	2099	16.2278	2099	10.495	35.6303	35.6227	1694.7	-0.415667	11.4157	0
A1002	F	11		157	40	2099	16.2278	2099	10.495	35.6303	35.6227	1694.7	-0.415667	11.4157	0
A1003	F	11		140	38	2100	19.3878	2100	10.5	35.6527	35.645	1312.2	-1.2054	12.2054	1
A1004	F	11		159	47	2100	18.591	2100	10.5	35.6527	35.645	1739.7	-0.322756	11.3228	0
A1005	F	11		140	38	2100	19.3878	2100	10.5	35.6527	35.645	1312.2	-1.2054	12.2054	1
A1006	F	11		159	47	2100	18.591	2100	10.5	35.6527	35.645	1739.7	-0.322756	11.3228	0
A1007	F	11		159	47	2100	18.591	2100	10.5	35.6527	35.645	1739.7	-0.322756	11.3228	0
A1008	F	11		140	38	2100	19.3878	2100	10.5	35.6527	35.645	1312.2	-1.2054	12.2054	1
A1009	F	11		143	32	2105	15.6487	2105	10.525	35.7644	35.7568	1379.7	-1.06604	12.066	1
A1010	F	11		143	32	2105	15.6487	2105	10.525	35.7644	35.7568	1379.7	-1.06604	12.066	1
A1011	F	11		143	32	2105	15.6487	2105	10.525	35.7644	35.7568	1379.7	-1.06604	12.066	1
A1012	F	11		142	30	2106	14.878	2106	10.53	35.7868	35.7791	1357.2	-1.11249	12.1125	1
A1013	F	11		142	30	2106	14.878	2106	10.53	35.7868	35.7791	1357.2	-1.11249	12.1125	1
A1014	F	11		135	30	2108	16.4609	2108	10.54	35.8315	35.8238	1199.7	-1.43768	12.4377	1
A1015	F	11		135	30	2108	16.4609	2108	10.54	35.8315	35.8238	1199.7	-1.43768	12.4377	1
A1016	F	11		135	30	2108	16.4609	2108	10.54	35.8315	35.8238	1199.7	-1.43768	12.4377	1
A1017	F	11		147.5	34.5	2110	15.8575	2110	10.55	35.8762	35.8685	1480.95	-0.856991	11.857	1
A1018	F	11		147.5	34.5	2110	15.8575	2110	10.55	35.8762	35.8685	1480.95	-0.856991	11.857	1
A1019	F	11		147.5	34.5	2110	15.8575	2110	10.55	35.8762	35.8685	1480.95	-0.856991	11.857	1
A1020	F	11		144	44	2110.75	21.2191	2110.75	10.5537	35.8929	35.8852	1402.2	-1.01958	12.0196	1
A1021	F	11		140	35	2117	17.8571	2117	10.585	36.0326	36.025	1312.2	-1.2054	12.2054	1
A1022	F	11		161	43	2117.65	16.5889	2117.65	10.5882	36.0471	36.0394	1784.7	-0.229846	11.2298	0
A1023	F	11		159	48	2117.65	18.9866	2117.65	10.5882	36.0471	36.0394	1739.7	-0.322756	11.3228	0
A1024	F	11		142	29	2120	14.3821	2120	10.6	36.0997	36.092	1357.2	-1.11249	12.1125	1
A1025	F	11		142	29	2120	14.3821	2120	10.6	36.0997	36.092	1357.2	-1.11249	12.1125	1
A1026	F	11		145	29	2122	13.7931	2122	10.61	36.1444	36.1367	1424.7	-0.973129	11.9731	1
A1027	F	11		145	29	2122	13.7931	2122	10.61	36.1444	36.1367	1424.7	-0.973129	11.9731	1
A1028	F	11		146	38	2124.59	17.827	2124.59	10.623	36.2023	36.1946	1447.2	-0.926674	11.9267	1
A1029	F	11		150.5	39.4	2128	17.395	2128	10.64	36.2785	36.2708	1548.45	-0.717625	11.7176	1
A1030	F	11		154	39	2150	16.4446	2150	10.75	36.7702	36.7625	1627.2	-0.555032	11.555	1
A1031	F	11		152	45.7	2150	19.7801	2150	10.75	36.7702	36.7625	1582.2	-0.647943	11.6479	1
A1032	F	11		154	39	2150	16.4446	2150	10.75	36.7702	36.7625	1627.2	-0.555032	11.555	1
A1033	F	11		152	45.7	2150	19.7801	2150	10.75	36.7702	36.7625	1582.2	-0.647943	11.6479	1
A1034	F	11		152	45.7	2150	19.7801	2150	10.75	36.7702	36.7625	1582.2	-0.647943	11.6479	1
A1035	F	11		143	36	2160	17.6048	2160	10.8	36.9937	36.986	1379.7	-1.06604	12.066	1
A1036	F	11		143	36	2160	17.6048	2160	10.8	36.9937	36.986	1379.7	-1.06604	12.066	1
A1037	F	11		153	50	2160	21.3593	2160	10.8	36.9937	36.986	1604.7	-0.601487	11.6015	1
A1038	F	11		143	36	2160	17.6048	2160	10.8	36.9937	36.986	1379.7	-1.06604	12.066	1
A1039	F	11		154	47	2160	19.8178	2160	10.8	36.9937	36.986	1627.2	-0.555032	11.555	1
A1040	F	11		147	31	2170	14.3459	2170	10.85	37.2173	37.2095	1469.7	-0.880219	11.8802	1
A1041	F	11		154	38	2180	16.0229	2180	10.9	37.4408	37.433	1627.2	-0.555032	11.555	1
A1042	F	11		154	38	2180	16.0229	2180	10.9	37.4408	37.433	1627.2	-0.555032	11.555	1
A1043	F	11		154	38	2180	16.0229	2180	10.9	37.4408	37.433	1627.2	-0.555032	11.555	1
A1044	F	11		149	40	2181.82	18.0172	2181.82	10.9091	37.4814	37.4736	1514.7	-0.787308	11.7873	1
A1045	F	11		155	34	2189.19	14.1519	2189.19	10.9459	37.6462	37.6384	1649.7	-0.508577	11.5086	1
A1046	F	11		150	35	2189.19	15.5556	2189.19	10.9459	37.6462	37.6384	1537.2	-0.740853	11.7409	1
A1047	F	11		161	40.45	2190	15.6051	2190	10.95	37.6643	37.6565	1784.7	-0.229846	11.2298	0
A1048	F	11		161	40.45	2190	15.6051	2190	10.95	37.6643	37.6565	1784.7	-0.229846	11.2298	0
A1049	F	11		161	40.45	2190	15.6051	2190	10.95	37.6643	37.6565	1784.7	-0.229846	11.2298	0
A1050	F	11		144	35	2196.61	16.8789	2196.61	10.9831	37.812	37.8042	1402.2	-1.01958	12.0196	1
A1051	F	11		145	39	2204.08	18.5493	2204.08	11.0204	37.979	37.9712	1424.7	-0.973129	11.9731	1
A1052	F	11		160	45	2210	17.5781	2210	11.05	38.1113	38.1035	1762.2	-0.276301	11.2763	0
A1053	F	11		142	27	2210	13.3902	2210	11.05	38.1113	38.1035	1357.2	-1.11249	12.1125	1
A1054	F	11		160	45	2210	17.5781	2210	11.05	38.1113	38.1035	1762.2	-0.276301	11.2763	0
A1055	F	11		160	45	2210	17.5781	2210	11.05	38.1113	38.1035	1762.2	-0.276301	11.2763	0
A1056	F	11		144	35	2213	16.8789	2213	11.065	38.1784	38.1706	1402.2	-1.01958	12.0196	1
A1057	F	11		145	37	2214	17.5981	2214	11.07	38.2007	38.1929	1424.7	-0.973129	11.9731	1
A1058	F	11		153	46	2214	19.6506	2214	11.07	38.2007	38.1929	1604.7	-0.601487	11.6015	1
A1059	F	11		145	37	2214	17.5981	2214	11.07	38.2007	38.1929	1424.7	-0.973129	11.9731	1
A1060	F	11		153	46	2214	19.6506	2214	11.07	38.2007	38.1929	1604.7	-0.601487	11.6015	1
A1061	F	11		145	37	2214	17.5981	2214	11.07	38.2007	38.1929	1424.7	-0.973129	11.9731	1
A1062	F	11		153	46	2214	19.6506	2214	11.07	38.2007	38.1929	1604.7	-0.601487	11.6015	1
A1063	F	11		144.5	30.1	2215	14.4155	2215	11.075	38.2231	38.2152	1413.45	-0.996357	11.9964	1
A1064	F	11		144.5	30.1	2215	14.4155	2215	11.075	38.2231	38.2152	1413.45	-0.996357	11.9964	1
A1065	F	11		153	40	2220	17.0874	2220	11.1	38.3348	38.327	1604.7	-0.601487	11.6015	1
A1066	F	11		153	40	2220	17.0874	2220	11.1	38.3348	38.327	1604.7	-0.601487	11.6015	1
A1067	F	11		153	40	2220	17.0874	2220	11.1	38.3348	38.327	1604.7	-0.601487	11.6015	1
A1068	F	11		151	40.2	2224	17.6308	2224	11.12	38.4242	38.4164	1559.7	-0.694398	11.6944	1
A1069	F	11		151	40.2	2224	17.6308	2224	11.12	38.4242	38.4164	1559.7	-0.694398	11.6944	1
A1070	F	11		151	40.2	2224	17.6308	2224	11.12	38.4242	38.4164	1559.7	-0.694398	11.6944	1
A1071	F	11		159	41	2226.8	16.2177	2226.8	11.134	38.4869	38.4791	1739.7	-0.322756	11.3228	0
A1072	F	11		154	44.7	2231	18.848	2231	11.155	38.5807	38.5729	1627.2	-0.555032	11.555	1
A1073	F	11		154	44.7	2231	18.848	2231	11.155	38.5807	38.5729	1627.2	-0.555032	11.555	1
A1074	F	11		154	44.7	2231	18.848	2231	11.155	38.5807	38.5729	1627.2	-0.555032	11.555	1
A1075	F	11		153	42	2240	17.9418	2240	11.2	38.7819	38.774	1604.7	-0.601487	11.6015	1
A1076	F	11		159	51	2242.21	20.1733	2242.21	11.2111	38.8313	38.8235	1739.7	-0.322756	11.3228	0
A1077	F	11		145	33	2268	15.6956	2268	11.34	39.4077	39.3998	1424.7	-0.973129	11.9731	1
A1078	F	11		153	39	2268	16.6603	2268	11.34	39.4077	39.3998	1604.7	-0.601487	11.6015	1
A1079	F	11		145	33	2268	15.6956	2268	11.34	39.4077	39.3998	1424.7	-0.973129	11.9731	1
A1080	F	11		153	39	2268	16.6603	2268	11.34	39.4077	39.3998	1604.7	-0.601487	11.6015	1
A1081	F	11		145	33	2268	15.6956	2268	11.34	39.4077	39.3998	1424.7	-0.973129	11.9731	1
A1082	F	11		153	39	2268	16.6603	2268	11.34	39.4077	39.3998	1604.7	-0.601487	11.6015	1
A1083	F	11		163	43	2273.68	16.1843	2273.68	11.3684	39.5347	39.5268	1829.7	-0.136935	11.1369	0
A1084	F	11		159	44	2273.68	17.4044	2273.68	11.3684	39.5347	39.5268	1739.7	-0.322756	11.3228	0
A1085	F	11		143.5	39.51	2280	19.1868	2280	11.4	39.6759	39.668	1390.95	-1.04281	12.0428	1
A1086	F	11		154	41.2	2295	17.3722	2295	11.475	40.0112	40.0033	1627.2	-0.555032	11.555	1
A1087	F	11		154	41.2	2295	17.3722	2295	11.475	40.0112	40.0033	1627.2	-0.555032	11.555	1
A1088	F	11		154	41.2	2295	17.3722	2295	11.475	40.0112	40.0033	1627.2	-0.555032	11.555	1
A1089	F	11		150	46	2306.05	20.4444	2306.05	11.5302	40.2582	40.2502	1537.2	-0.740853	11.7409	1
A1090	F	11		142	42	2322	20.8292	2322	11.61	40.6147	40.6067	1357.2	-1.11249	12.1125	1
A1091	F	11		145	36	2322	17.1225	2322	11.61	40.6147	40.6067	1424.7	-0.973129	11.9731	1
A1092	F	11		142	42	2322	20.8292	2322	11.61	40.6147	40.6067	1357.2	-1.11249	12.1125	1
A1093	F	11		145	36	2322	17.1225	2322	11.61	40.6147	40.6067	1424.7	-0.973129	11.9731	1
A1094	F	11		145	36	2322	17.1225	2322	11.61	40.6147	40.6067	1424.7	-0.973129	11.9731	1
A1095	F	11		142	42	2322	20.8292	2322	11.61	40.6147	40.6067	1357.2	-1.11249	12.1125	1
A1096	F	11		160	49	2360	19.1406	2360	11.8	41.464	41.456	1762.2	-0.276301	11.2763	0
A1097	F	11		160	49	2360	19.1406	2360	11.8	41.464	41.456	1762.2	-0.276301	11.2763	0
A1098	F	11		160	49	2360	19.1406	2360	11.8	41.464	41.456	1762.2	-0.276301	11.2763	0
A1099	F	11		157	41	2370	16.6335	2370	11.85	41.6875	41.6795	1694.7	-0.415667	11.4157	0
A1100	F	11		157	41	2370	16.6335	2370	11.85	41.6875	41.6795	1694.7	-0.415667	11.4157	0
A1101	F	11		159	44	2390	17.4044	2390	11.95	42.1346	42.1265	1739.7	-0.322756	11.3228	0
A1102	F	11		159	44	2390	17.4044	2390	11.95	42.1346	42.1265	1739.7	-0.322756	11.3228	0
A1103	F	11		159	44	2390	17.4044	2390	11.95	42.1346	42.1265	1739.7	-0.322756	11.3228	0
A1104	F	11		156	38	2393	15.6147	2393	11.965	42.2016	42.1936	1672.2	-0.462122	11.4621	0
A1105	F	11		156	38	2393	15.6147	2393	11.965	42.2016	42.1936	1672.2	-0.462122	11.4621	0
A1106	F	11		156	38	2393	15.6147	2393	11.965	42.2016	42.1936	1672.2	-0.462122	11.4621	0
A1107	F	11		145	35	2400	16.6468	2400	12	42.3581	42.35	1424.7	-0.973129	11.9731	1
A1108	F	11		146	39	2400	18.2961	2400	12	42.3581	42.35	1447.2	-0.926674	11.9267	1
A1109	F	11		162	51	2400	19.433	2400	12	42.3581	42.35	1807.2	-0.183391	11.1834	0
A1110	F	11		145	35	2400	16.6468	2400	12	42.3581	42.35	1424.7	-0.973129	11.9731	1
A1111	F	11		146	39	2400	18.2961	2400	12	42.3581	42.35	1447.2	-0.926674	11.9267	1
A1112	F	11		162	51	2400	19.433	2400	12	42.3581	42.35	1807.2	-0.183391	11.1834	0
A1113	F	11		147	36	2400	16.6597	2400	12	42.3581	42.35	1469.7	-0.880219	11.8802	1
A1114	F	11		164	42	2400	15.6157	2400	12	42.3581	42.35	1852.2	-0.0904802	11.0905	0
A1115	F	11		159	44	2400	17.4044	2400	12	42.3581	42.35	1739.7	-0.322756	11.3228	0
A1116	F	11		141	30	2400	15.0898	2400	12	42.3581	42.35	1334.7	-1.15895	12.1589	1
A1117	F	11		156	38	2400	15.6147	2400	12	42.3581	42.35	1672.2	-0.462122	11.4621	0
A1118	F	11		156	46	2417.91	18.902	2417.91	12.0896	42.7584	42.7503	1672.2	-0.462122	11.4621	0
A1119	F	11		153	40	2461	17.0874	2461	12.305	43.7215	43.7133	1604.7	-0.601487	11.6015	1
A1120	F	11		153	40	2461	17.0874	2461	12.305	43.7215	43.7133	1604.7	-0.601487	11.6015	1
A1121	F	11		153	40	2461	17.0874	2461	12.305	43.7215	43.7133	1604.7	-0.601487	11.6015	1
A1122	F	11		149	35	2560	15.7651	2560	12.8	45.9343	45.926	1514.7	-0.787308	11.7873	1
A1123	F	11		155	36.6	2565	15.2341	2565	12.825	46.046	46.0378	1649.7	-0.508577	11.5086	1
A1124	F	11		155	36.6	2565	15.2341	2565	12.825	46.046	46.0378	1649.7	-0.508577	11.5086	1
A1125	F	11		155	36.6	2565	15.2341	2565	12.825	46.046	46.0378	1649.7	-0.508577	11.5086	1
A1126	F	11		157	42.5	2571.43	17.2421	2571.43	12.8571	46.1897	46.1814	1694.7	-0.415667	11.4157	0
A1127	F	11		154	34	2854.63	14.3363	2854.63	14.2731	52.5196	52.5109	1627.2	-0.555032	11.555	1
A2316	F	12		160	45	1008	17.5781	1008	5.04	11.245	11.2388	1762.2	0.399411	11.6006	0
A2317	F	12		147	31.5	1008	14.5773	1008	5.04	11.245	11.2388	1469.7	-0.259408	12.2594	0
A2318	F	12		160	45	1008	17.5781	1008	5.04	11.245	11.2388	1762.2	0.399411	11.6006	0
A2319	F	12		147	31.5	1008	14.5773	1008	5.04	11.245	11.2388	1469.7	-0.259408	12.2594	0
A2320	F	12		160	45	1008	17.5781	1008	5.04	11.245	11.2388	1762.2	0.399411	11.6006	0
A2321	F	12		157	42.5	1032	17.2421	1032	5.16	11.7814	11.7752	1694.7	0.247376	11.7526	0
A2322	F	12		157	42.5	1032	17.2421	1032	5.16	11.7814	11.7752	1694.7	0.247376	11.7526	0
A2323	F	12		157	42.5	1032	17.2421	1032	5.16	11.7814	11.7752	1694.7	0.247376	11.7526	0
A2324	F	12		157	46	1032	18.662	1032	5.16	11.7814	11.7752	1694.7	0.247376	11.7526	0
A2325	F	12		169	52	1032	18.2066	1032	5.16	11.7814	11.7752	1964.7	0.855517	11.1445	-1
A2326	F	12		161	46	1056	17.7462	1056	5.28	12.3178	12.3116	1784.7	0.450089	11.5499	0
A2327	F	12		164	50	1056	18.5901	1056	5.28	12.3178	12.3116	1852.2	0.602125	11.3979	-1
A2328	F	12		161	46	1056	17.7462	1056	5.28	12.3178	12.3116	1784.7	0.450089	11.5499	0
A2329	F	12		164	50	1056	18.5901	1056	5.28	12.3178	12.3116	1852.2	0.602125	11.3979	-1
A2330	F	12		164	50	1056	18.5901	1056	5.28	12.3178	12.3116	1852.2	0.602125	11.3979	-1
A2331	F	12		161	46	1056	17.7462	1056	5.28	12.3178	12.3116	1784.7	0.450089	11.5499	0
A2332	F	12		152	44	1056	19.0443	1056	5.28	12.3178	12.3116	1582.2	-0.0060162	12.006	0
A2333	F	12		152	41	1089	17.7458	1089	5.445	13.0554	13.0492	1582.2	-0.0060162	12.006	0
A2334	F	12		152	41	1089	17.7458	1089	5.445	13.0554	13.0492	1582.2	-0.0060162	12.006	0
A2335	F	12		152	41	1089	17.7458	1089	5.445	13.0554	13.0492	1582.2	-0.0060162	12.006	0
A2336	F	12		164	50.5	1100	18.776	1100	5.5	13.3013	13.295	1852.2	0.602125	11.3979	-1
A2337	F	12		164	50.5	1100	18.776	1100	5.5	13.3013	13.295	1852.2	0.602125	11.3979	-1
A2338	F	12		164	50.5	1100	18.776	1100	5.5	13.3013	13.295	1852.2	0.602125	11.3979	-1
A2339	F	12		146	31	1104	14.5431	1104	5.52	13.3907	13.3844	1447.2	-0.310087	12.3101	0
A2340	F	12		149	32	1104	14.4138	1104	5.52	13.3907	13.3844	1514.7	-0.158051	12.1581	0
A2341	F	12		146	31	1104	14.5431	1104	5.52	13.3907	13.3844	1447.2	-0.310087	12.3101	0
A2342	F	12		160	47	1104	18.3594	1104	5.52	13.3907	13.3844	1762.2	0.399411	11.6006	0
A2343	F	12		160	52	1104	20.3125	1104	5.52	13.3907	13.3844	1762.2	0.399411	11.6006	0
A2344	F	12		146	64.2	1111	30.1182	1111	5.555	13.5472	13.5409	1447.2	-0.310087	12.3101	0
A2345	F	12		172	82	1125	27.7177	1125	5.625	13.8601	13.8538	2032.2	1.00755	10.9924	-1
A2346	F	12		156	30	1128	12.3274	1128	5.64	13.9271	13.9208	1672.2	0.196697	11.8033	0
A2347	F	12		156	30	1128	12.3274	1128	5.64	13.9271	13.9208	1672.2	0.196697	11.8033	0
A2348	F	12		157	37	1134	14.8079	1134	5.67	14.0612	14.0549	1694.7	0.247376	11.7526	0
A2349	F	12		157	37	1134	14.8079	1134	5.67	14.0612	14.0549	1694.7	0.247376	11.7526	0
A2350	F	12		157	35	1144	14.1994	1144	5.72	14.2848	14.2784	1694.7	0.247376	11.7526	0
A2351	F	12		157	35	1144	14.1994	1144	5.72	14.2848	14.2784	1694.7	0.247376	11.7526	0
A2352	F	12		162	47.5	1152	18.0994	1152	5.76	14.4636	14.4572	1807.2	0.500768	11.4992	-1
A2353	F	12		156	35	1176	14.382	1176	5.88	15	14.9936	1672.2	0.196697	11.8033	0
A2354	F	12		156	35	1176	14.382	1176	5.88	15	14.9936	1672.2	0.196697	11.8033	0
A2355	F	12		158	63.9	1188	25.5969	1188	5.94	15.2682	15.2618	1717.2	0.298054	11.7019	0
A2356	F	12		158	63.9	1188	25.5969	1188	5.94	15.2682	15.2618	1717.2	0.298054	11.7019	0
A2357	F	12		158	63.9	1188	25.5969	1188	5.94	15.2682	15.2618	1717.2	0.298054	11.7019	0
A2358	F	12		156	49.5	1190	20.3402	1190	5.95	15.3129	15.3065	1672.2	0.196697	11.8033	0
A2359	F	12		156	49.5	1190	20.3402	1190	5.95	15.3129	15.3065	1672.2	0.196697	11.8033	0
A2360	F	12		156	49.5	1190	20.3402	1190	5.95	15.3129	15.3065	1672.2	0.196697	11.8033	0
A2361	F	12		162	55	1200	20.9572	1200	6	15.5364	15.53	1807.2	0.500768	11.4992	-1
A2362	F	12		148	47	1200	21.4573	1200	6	15.5364	15.53	1492.2	-0.20873	12.2087	0
A2363	F	12		157	42	1200	17.0392	1200	6	15.5364	15.53	1694.7	0.247376	11.7526	0
A2364	F	12		162	49	1200	18.6709	1200	6	15.5364	15.53	1807.2	0.500768	11.4992	-1
A2365	F	12		163	46	1200	17.3134	1200	6	15.5364	15.53	1829.7	0.551446	11.4486	-1
A2366	F	12		164	53	1200	19.7055	1200	6	15.5364	15.53	1852.2	0.602125	11.3979	-1
A2367	F	12		153	35	1200	14.9515	1200	6	15.5364	15.53	1604.7	0.0446622	11.9553	0
A2368	F	12		162	55	1200	20.9572	1200	6	15.5364	15.53	1807.2	0.500768	11.4992	-1
A2369	F	12		148	47	1200	21.4573	1200	6	15.5364	15.53	1492.2	-0.20873	12.2087	0
A2370	F	12		157	42	1200	17.0392	1200	6	15.5364	15.53	1694.7	0.247376	11.7526	0
A2371	F	12		162	49	1200	18.6709	1200	6	15.5364	15.53	1807.2	0.500768	11.4992	-1
A2372	F	12		163	46	1200	17.3134	1200	6	15.5364	15.53	1829.7	0.551446	11.4486	-1
A2373	F	12		164	53	1200	19.7055	1200	6	15.5364	15.53	1852.2	0.602125	11.3979	-1
A2374	F	12		153	35	1200	14.9515	1200	6	15.5364	15.53	1604.7	0.0446622	11.9553	0
A2375	F	12		166	46.9	1200	17.0199	1200	6	15.5364	15.53	1897.2	0.703481	11.2965	-1
A2376	F	12		157	42	1200	17.0392	1200	6	15.5364	15.53	1694.7	0.247376	11.7526	0
A2377	F	12		148	47	1200	21.4573	1200	6	15.5364	15.53	1492.2	-0.20873	12.2087	0
A2378	F	12		164	53	1200	19.7055	1200	6	15.5364	15.53	1852.2	0.602125	11.3979	-1
A2379	F	12		162	49	1200	18.6709	1200	6	15.5364	15.53	1807.2	0.500768	11.4992	-1
A2380	F	12		160	53	1200	20.7031	1200	6	15.5364	15.53	1762.2	0.399411	11.6006	0
A2381	F	12		163	46	1200	17.3134	1200	6	15.5364	15.53	1829.7	0.551446	11.4486	-1
A2382	F	12		161	60	1200	23.1473	1200	6	15.5364	15.53	1784.7	0.450089	11.5499	0
A2383	F	12		157	63	1200	25.5588	1200	6	15.5364	15.53	1694.7	0.247376	11.7526	0
A2384	F	12		156	74	1211	30.4076	1211	6.055	15.7823	15.7759	1672.2	0.196697	11.8033	0
A2385	F	12		156	39.5	1224	16.2311	1224	6.12	16.0729	16.0664	1672.2	0.196697	11.8033	0
A2386	F	12		156	39.5	1224	16.2311	1224	6.12	16.0729	16.0664	1672.2	0.196697	11.8033	0
A2387	F	12		156	39.5	1224	16.2311	1224	6.12	16.0729	16.0664	1672.2	0.196697	11.8033	0
A2388	F	12		157	57.6	1242	23.3681	1242	6.21	16.4752	16.4687	1694.7	0.247376	11.7526	0
A2389	F	12		157	57.6	1242	23.3681	1242	6.21	16.4752	16.4687	1694.7	0.247376	11.7526	0
A2390	F	12		157	57.6	1242	23.3681	1242	6.21	16.4752	16.4687	1694.7	0.247376	11.7526	0
A2391	F	12		156	57	1249	23.4221	1249	6.245	16.6316	16.6252	1672.2	0.196697	11.8033	0
A2392	F	12		150	37.5	1272	16.6667	1272	6.36	17.1457	17.1392	1537.2	-0.107373	12.1074	0
A2393	F	12		151	43.7	1282	19.1658	1282	6.41	17.3692	17.3627	1559.7	-0.0566946	12.0567	0
A2394	F	12		153	47.2	1300	20.1632	1300	6.5	17.7716	17.765	1604.7	0.0446622	11.9553	0
A2395	F	12		162	42	1300	16.0037	1300	6.5	17.7716	17.765	1807.2	0.500768	11.4992	-1
A2396	F	12		153	47.2	1300	20.1632	1300	6.5	17.7716	17.765	1604.7	0.0446622	11.9553	0
A2397	F	12		162	42	1300	16.0037	1300	6.5	17.7716	17.765	1807.2	0.500768	11.4992	-1
A2398	F	12		162	42	1300	16.0037	1300	6.5	17.7716	17.765	1807.2	0.500768	11.4992	-1
A2399	F	12		149	43.8	1300	19.7288	1300	6.5	17.7716	17.765	1514.7	-0.158051	12.1581	0
A2400	F	12		153	47.2	1300	20.1632	1300	6.5	17.7716	17.765	1604.7	0.0446622	11.9553	0
A2401	F	12		156	44	1330	17.9569	1330	6.65	18.4421	18.4355	1672.2	0.196697	11.8033	0
A2402	F	12		156	44	1330	17.9569	1330	6.65	18.4421	18.4355	1672.2	0.196697	11.8033	0
A2403	F	12		160	56	1346	21.875	1346	6.73	18.7997	18.7931	1762.2	0.399411	11.6006	0
A2404	F	12		160	56	1346	21.875	1346	6.73	18.7997	18.7931	1762.2	0.399411	11.6006	0
A2405	F	12		157	55	1350	22.3133	1350	6.75	18.8891	18.8825	1694.7	0.247376	11.7526	0
A2406	F	12		168	61	1350	21.6128	1350	6.75	18.8891	18.8825	1942.2	0.804838	11.1952	-1
A2407	F	12		145	30	1350	14.2687	1350	6.75	18.8891	18.8825	1424.7	-0.360765	12.3608	0
A2408	F	12		157	55	1350	22.3133	1350	6.75	18.8891	18.8825	1694.7	0.247376	11.7526	0
A2409	F	12		168	61	1350	21.6128	1350	6.75	18.8891	18.8825	1942.2	0.804838	11.1952	-1
A2410	F	12		145	30	1350	14.2687	1350	6.75	18.8891	18.8825	1424.7	-0.360765	12.3608	0
A2411	F	12		168	61	1350	21.6128	1350	6.75	18.8891	18.8825	1942.2	0.804838	11.1952	-1
A2412	F	12		146	38.3	1381	17.9677	1381	6.905	19.582	19.5754	1447.2	-0.310087	12.3101	0
A2413	F	12		146	38.3	1381	17.9677	1381	6.905	19.582	19.5754	1447.2	-0.310087	12.3101	0
A2414	F	12		146	38.3	1381	17.9677	1381	6.905	19.582	19.5754	1447.2	-0.310087	12.3101	0
A2415	F	12		160	48	1390	18.75	1390	6.95	19.7832	19.7765	1762.2	0.399411	11.6006	0
A2416	F	12		160	48	1390	18.75	1390	6.95	19.7832	19.7765	1762.2	0.399411	11.6006	0
A2417	F	12		160	48	1390	18.75	1390	6.95	19.7832	19.7765	1762.2	0.399411	11.6006	0
A2418	F	12		147	36	1393.55	16.6597	1393.55	6.96774	19.8625	19.8558	1469.7	-0.259408	12.2594	0
A2419	F	12		154	50	1400	21.0828	1400	7	20.0067	20	1627.2	0.0953406	11.9047	0
A2420	F	12		157	52	1400	21.0962	1400	7	20.0067	20	1694.7	0.247376	11.7526	0
A2421	F	12		161	66	1400	25.462	1400	7	20.0067	20	1784.7	0.450089	11.5499	0
A2422	F	12		154	50	1400	21.0828	1400	7	20.0067	20	1627.2	0.0953406	11.9047	0
A2423	F	12		157	52	1400	21.0962	1400	7	20.0067	20	1694.7	0.247376	11.7526	0
A2424	F	12		161	66	1400	25.462	1400	7	20.0067	20	1784.7	0.450089	11.5499	0
A2425	F	12		157	52	1400	21.0962	1400	7	20.0067	20	1694.7	0.247376	11.7526	0
A2426	F	12		161	66	1400	25.462	1400	7	20.0067	20	1784.7	0.450089	11.5499	0
A2427	F	12		148	45	1400	20.5442	1400	7	20.0067	20	1492.2	-0.20873	12.2087	0
A2428	F	12		154	51.6	1404	21.7575	1404	7.02	20.0961	20.0894	1627.2	0.0953406	11.9047	0
A2429	F	12		154	51.6	1404	21.7575	1404	7.02	20.0961	20.0894	1627.2	0.0953406	11.9047	0
A2430	F	12		155	74	1404	30.8012	1404	7.02	20.0961	20.0894	1649.7	0.146019	11.854	0
A2431	F	12		154	51.6	1404	21.7575	1404	7.02	20.0961	20.0894	1627.2	0.0953406	11.9047	0
A2432	F	12		154	52	1414	21.9261	1414	7.07	20.3196	20.3129	1627.2	0.0953406	11.9047	0
A2433	F	12		154	52	1414	21.9261	1414	7.07	20.3196	20.3129	1627.2	0.0953406	11.9047	0
A2434	F	12		159	73	1429	28.8754	1429	7.145	20.6549	20.6482	1739.7	0.348733	11.6513	0
A2435	F	12		158	74.8	1430	29.9631	1430	7.15	20.6772	20.6705	1717.2	0.298054	11.7019	0
A2436	F	12		144	42.4	1431	20.4475	1431	7.155	20.6996	20.6929	1402.2	-0.411443	12.4114	0
A2437	F	12		144	42.4	1431	20.4475	1431	7.155	20.6996	20.6929	1402.2	-0.411443	12.4114	0
A2438	F	12		144	42.4	1431	20.4475	1431	7.155	20.6996	20.6929	1402.2	-0.411443	12.4114	0
A2439	F	12		140	32	1440	16.3265	1440	7.2	20.9008	20.894	1312.2	-0.614157	12.6142	1
A2440	F	12		154	65	1442	27.4077	1442	7.21	20.9455	20.9387	1627.2	0.0953406	11.9047	0
A2441	F	12		154	65	1442	27.4077	1442	7.21	20.9455	20.9387	1627.2	0.0953406	11.9047	0
A2442	F	12		150	42	1449	18.6667	1449	7.245	21.1019	21.0952	1537.2	-0.107373	12.1074	0
A2443	F	12		150	42	1449	18.6667	1449	7.245	21.1019	21.0952	1537.2	-0.107373	12.1074	0
A2444	F	12		153	36.2	1449	15.4641	1449	7.245	21.1019	21.0952	1604.7	0.0446622	11.9553	0
A2445	F	12		156	37	1450	15.0394	1450	7.25	21.1243	21.1175	1672.2	0.196697	11.8033	0
A2446	F	12		169	61	1450	21.3578	1450	7.25	21.1243	21.1175	1964.7	0.855517	11.1445	-1
A2447	F	12		156	37	1450	15.0394	1450	7.25	21.1243	21.1175	1672.2	0.196697	11.8033	0
A2448	F	12		169	61	1450	21.3578	1450	7.25	21.1243	21.1175	1964.7	0.855517	11.1445	-1
A2449	F	12		169	61	1450	21.3578	1450	7.25	21.1243	21.1175	1964.7	0.855517	11.1445	-1
A2450	F	12		156	49	1453	20.1348	1453	7.265	21.1913	21.1846	1672.2	0.196697	11.8033	0
A2451	F	12		156	49	1453	20.1348	1453	7.265	21.1913	21.1846	1672.2	0.196697	11.8033	0
A2452	F	12		156	49	1453	20.1348	1453	7.265	21.1913	21.1846	1672.2	0.196697	11.8033	0
A2453	F	12		155	48	1456.18	19.9792	1456.18	7.2809	21.2624	21.2556	1649.7	0.146019	11.854	0
A2454	F	12		156	51	1456.18	20.9566	1456.18	7.2809	21.2624	21.2556	1672.2	0.196697	11.8033	0
A2455	F	12		154	44.7	1458	18.848	1458	7.29	21.3031	21.2963	1627.2	0.0953406	11.9047	0
A2456	F	12		161	50	1459	19.2894	1459	7.295	21.3254	21.3187	1784.7	0.450089	11.5499	0
A2457	F	12		161	50	1459	19.2894	1459	7.295	21.3254	21.3187	1784.7	0.450089	11.5499	0
A2458	F	12		161	50	1459	19.2894	1459	7.295	21.3254	21.3187	1784.7	0.450089	11.5499	0
A2459	F	12		154	54.1	1460	22.8116	1460	7.3	21.3478	21.341	1627.2	0.0953406	11.9047	0
A2460	F	12		154	54.1	1460	22.8116	1460	7.3	21.3478	21.341	1627.2	0.0953406	11.9047	0
A2461	F	12		154	54.1	1460	22.8116	1460	7.3	21.3478	21.341	1627.2	0.0953406	11.9047	0
A2462	F	12		166	55.3	1462	20.0682	1462	7.31	21.3925	21.3857	1897.2	0.703481	11.2965	-1
A2463	F	12		166	55.3	1462	20.0682	1462	7.31	21.3925	21.3857	1897.2	0.703481	11.2965	-1
A2464	F	12		166	55.3	1462	20.0682	1462	7.31	21.3925	21.3857	1897.2	0.703481	11.2965	-1
A2465	F	12		155	44	1470	18.3143	1470	7.35	21.5713	21.5645	1649.7	0.146019	11.854	0
A2466	F	12		155	44	1470	18.3143	1470	7.35	21.5713	21.5645	1649.7	0.146019	11.854	0
A2467	F	12		155	44	1470	18.3143	1470	7.35	21.5713	21.5645	1649.7	0.146019	11.854	0
A2468	F	12		151	52	1479.45	22.806	1479.45	7.39726	21.7826	21.7758	1559.7	-0.0566946	12.0567	0
A2469	F	12		151	54	1480	23.6393	1480	7.4	21.7948	21.788	1559.7	-0.0566946	12.0567	0
A2470	F	12		164	65.1	1480	24.2043	1480	7.4	21.7948	21.788	1852.2	0.602125	11.3979	-1
A2471	F	12		151	54	1480	23.6393	1480	7.4	21.7948	21.788	1559.7	-0.0566946	12.0567	0
A2472	F	12		164	65.1	1480	24.2043	1480	7.4	21.7948	21.788	1852.2	0.602125	11.3979	-1
A2473	F	12		164	65.1	1480	24.2043	1480	7.4	21.7948	21.788	1852.2	0.602125	11.3979	-1
A2474	F	12		143	35	1500	17.0179	1500	7.5	22.2418	22.235	1379.7	-0.462122	12.4621	0
A2475	F	12		152	64	1500	27.7008	1500	7.5	22.2418	22.235	1582.2	-0.0060162	12.006	0
A2476	F	12		152	64	1500	27.7008	1500	7.5	22.2418	22.235	1582.2	-0.0060162	12.006	0
A2477	F	12		152	64	1500	27.7008	1500	7.5	22.2418	22.235	1582.2	-0.0060162	12.006	0
A2478	F	12		152	64	1500	27.7008	1500	7.5	22.2418	22.235	1582.2	-0.0060162	12.006	0
A2479	F	12		143	35	1500	17.0179	1500	7.5	22.2418	22.235	1379.7	-0.462122	12.4621	0
A2480	F	12		156	64	1500	26.2985	1500	7.5	22.2418	22.235	1672.2	0.196697	11.8033	0
A2481	F	12		152	64	1500	27.7008	1500	7.5	22.2418	22.235	1582.2	-0.0060162	12.006	0
A2482	F	12		152	64	1500	27.7008	1500	7.5	22.2418	22.235	1582.2	-0.0060162	12.006	0
A2483	F	12		152	64	1500	27.7008	1500	7.5	22.2418	22.235	1582.2	-0.0060162	12.006	0
A2484	F	12		152	64	1500	27.7008	1500	7.5	22.2418	22.235	1582.2	-0.0060162	12.006	0
A2485	F	12		164	86	1500	31.975	1500	7.5	22.2418	22.235	1852.2	0.602125	11.3979	-1
A2486	F	12		156.5	54	1506	22.0478	1506	7.53	22.3759	22.3691	1683.45	0.222037	11.778	0
A2487	F	12		156.5	54	1506	22.0478	1506	7.53	22.3759	22.3691	1683.45	0.222037	11.778	0
A2488	F	12		156.5	54	1506	22.0478	1506	7.53	22.3759	22.3691	1683.45	0.222037	11.778	0
A2489	F	12		148	57	1515	26.0226	1515	7.575	22.5771	22.5703	1492.2	-0.20873	12.2087	0
A2490	F	12		148	57	1515	26.0226	1515	7.575	22.5771	22.5703	1492.2	-0.20873	12.2087	0
A2491	F	12		162	64	1520	24.3865	1520	7.6	22.6889	22.682	1807.2	0.500768	11.4992	-1
A2492	F	12		159	52	1526	20.5688	1526	7.63	22.823	22.8161	1739.7	0.348733	11.6513	0
A2493	F	12		159	52	1526	20.5688	1526	7.63	22.823	22.8161	1739.7	0.348733	11.6513	0
A2494	F	12		159	52	1526	20.5688	1526	7.63	22.823	22.8161	1739.7	0.348733	11.6513	0
A2495	F	12		166	67.4	1526	24.4593	1526	7.63	22.823	22.8161	1897.2	0.703481	11.2965	-1
A2496	F	12		156	56.5	1530	23.2166	1530	7.65	22.9124	22.9055	1672.2	0.196697	11.8033	0
A2497	F	12		156	56.5	1530	23.2166	1530	7.65	22.9124	22.9055	1672.2	0.196697	11.8033	0
A2498	F	12		156	56.5	1530	23.2166	1530	7.65	22.9124	22.9055	1672.2	0.196697	11.8033	0
A2499	F	12		163	55	1533	20.7008	1533	7.665	22.9794	22.9725	1829.7	0.551446	11.4486	-1
A2500	F	12		163	55	1533	20.7008	1533	7.665	22.9794	22.9725	1829.7	0.551446	11.4486	-1
A2501	F	12		153	51	1536	21.7865	1536	7.68	23.0465	23.0396	1604.7	0.0446622	11.9553	0
A2502	F	12		153	51	1536	21.7865	1536	7.68	23.0465	23.0396	1604.7	0.0446622	11.9553	0
A2503	F	12		161	42	1539	16.2031	1539	7.695	23.1135	23.1067	1784.7	0.450089	11.5499	0
A2504	F	12		161	42	1539	16.2031	1539	7.695	23.1135	23.1067	1784.7	0.450089	11.5499	0
A2505	F	12		161	42	1539	16.2031	1539	7.695	23.1135	23.1067	1784.7	0.450089	11.5499	0
A2506	F	12		146	34	1540	15.9505	1540	7.7	23.1359	23.129	1447.2	-0.310087	12.3101	0
A2507	F	12		146	34	1540	15.9505	1540	7.7	23.1359	23.129	1447.2	-0.310087	12.3101	0
A2508	F	12		165	68.45	1540	25.1423	1540	7.7	23.1359	23.129	1874.7	0.652803	11.3472	-1
A2509	F	12		146	34	1540	15.9505	1540	7.7	23.1359	23.129	1447.2	-0.310087	12.3101	0
A2510	F	12		143	42	1540	20.5389	1540	7.7	23.1359	23.129	1379.7	-0.462122	12.4621	0
A2511	F	12		152	32	1545	13.8504	1545	7.725	23.2477	23.2407	1582.2	-0.0060162	12.006	0
A2512	F	12		152	32	1545	13.8504	1545	7.725	23.2477	23.2407	1582.2	-0.0060162	12.006	0
A2513	F	12		164	52	1550	19.4453	1550	7.75	23.3594	23.3525	1852.2	0.602125	11.3979	-1
A2514	F	12		151	40.5	1550	17.7624	1550	7.75	23.3594	23.3525	1559.7	-0.0566946	12.0567	0
A2515	F	12		164	52	1550	19.4453	1550	7.75	23.3594	23.3525	1852.2	0.602125	11.3979	-1
A2516	F	12		151	40.5	1550	17.7624	1550	7.75	23.3594	23.3525	1559.7	-0.0566946	12.0567	0
A2517	F	12		151	40.5	1550	17.7624	1550	7.75	23.3594	23.3525	1559.7	-0.0566946	12.0567	0
A2518	F	12		158	44.3	1552	17.7456	1552	7.76	23.4041	23.3972	1717.2	0.298054	11.7019	0
A2519	F	12		158	44.3	1552	17.7456	1552	7.76	23.4041	23.3972	1717.2	0.298054	11.7019	0
A2520	F	12		158	44.3	1552	17.7456	1552	7.76	23.4041	23.3972	1717.2	0.298054	11.7019	0
A2521	F	12		148	39	1553	17.805	1553	7.765	23.4265	23.4196	1492.2	-0.20873	12.2087	0
A2522	F	12		148	39	1553	17.805	1553	7.765	23.4265	23.4196	1492.2	-0.20873	12.2087	0
A2523	F	12		148	39	1553	17.805	1553	7.765	23.4265	23.4196	1492.2	-0.20873	12.2087	0
A2524	F	12		146	42	1560	19.7035	1560	7.8	23.5829	23.576	1447.2	-0.310087	12.3101	0
A2525	F	12		146	42	1560	19.7035	1560	7.8	23.5829	23.576	1447.2	-0.310087	12.3101	0
A2526	F	12		160	58	1560	22.6562	1560	7.8	23.5829	23.576	1762.2	0.399411	11.6006	0
A2527	F	12		160	58	1560	22.6562	1560	7.8	23.5829	23.576	1762.2	0.399411	11.6006	0
A2528	F	12		146	42	1560	19.7035	1560	7.8	23.5829	23.576	1447.2	-0.310087	12.3101	0
A2529	F	12		146	42	1560	19.7035	1560	7.8	23.5829	23.576	1447.2	-0.310087	12.3101	0
A2530	F	12		160	58	1560	22.6562	1560	7.8	23.5829	23.576	1762.2	0.399411	11.6006	0
A2531	F	12		160	58	1560	22.6562	1560	7.8	23.5829	23.576	1762.2	0.399411	11.6006	0
A2532	F	12		156	46	1560	18.902	1560	7.8	23.5829	23.576	1672.2	0.196697	11.8033	0
A2533	F	12		148	33	1560	15.0657	1560	7.8	23.5829	23.576	1492.2	-0.20873	12.2087	0
A2534	F	12		158	58	1560	23.2335	1560	7.8	23.5829	23.576	1717.2	0.298054	11.7019	0
A2535	F	12		154	74	1570	31.2026	1570	7.85	23.8064	23.7995	1627.2	0.0953406	11.9047	0
A2536	F	12		164	54.5	1580	20.2632	1580	7.9	24.03	24.023	1852.2	0.602125	11.3979	-1
A2537	F	12		164	54.5	1580	20.2632	1580	7.9	24.03	24.023	1852.2	0.602125	11.3979	-1
A2538	F	12		164	54.5	1580	20.2632	1580	7.9	24.03	24.023	1852.2	0.602125	11.3979	-1
A2539	F	12		155	57	1580.49	23.7253	1580.49	7.90244	24.0409	24.0339	1649.7	0.146019	11.854	0
A2540	F	12		149	52.3	1583	23.5575	1583	7.915	24.097	24.0901	1514.7	-0.158051	12.1581	0
A2541	F	12		149	52.3	1583	23.5575	1583	7.915	24.097	24.0901	1514.7	-0.158051	12.1581	0
A2542	F	12		149	52.3	1583	23.5575	1583	7.915	24.097	24.0901	1514.7	-0.158051	12.1581	0
A2543	F	12		171	61	1584	20.8611	1584	7.92	24.1194	24.1124	2009.7	0.956873	11.0431	-1
A2544	F	12		152	54.1	1587	23.4159	1587	7.935	24.1864	24.1795	1582.2	-0.0060162	12.006	0
A2545	F	12		152	54.1	1587	23.4159	1587	7.935	24.1864	24.1795	1582.2	-0.0060162	12.006	0
A2546	F	12		152	54.1	1587	23.4159	1587	7.935	24.1864	24.1795	1582.2	-0.0060162	12.006	0
A2547	F	12		160	56	1588.24	21.875	1588.24	7.94118	24.214	24.2071	1762.2	0.399411	11.6006	0
A2548	F	12		164	71.5	1589	26.5839	1589	7.945	24.2311	24.2242	1852.2	0.602125	11.3979	-1
A2549	F	12		155	48.25	1590	20.0832	1590	7.95	24.2535	24.2465	1649.7	0.146019	11.854	0
A2550	F	12		155	48.25	1590	20.0832	1590	7.95	24.2535	24.2465	1649.7	0.146019	11.854	0
A2551	F	12		155	48.25	1590	20.0832	1590	7.95	24.2535	24.2465	1649.7	0.146019	11.854	0
A2552	F	12		165	60	1596	22.0386	1596	7.98	24.3876	24.3806	1874.7	0.652803	11.3472	-1
A2553	F	12		165	60	1596	22.0386	1596	7.98	24.3876	24.3806	1874.7	0.652803	11.3472	-1
A2554	F	12		154	47	1596	19.8178	1596	7.98	24.3876	24.3806	1627.2	0.0953406	11.9047	0
A2555	F	12		153	36	1599	15.3787	1599	7.995	24.4546	24.4477	1604.7	0.0446622	11.9553	0
A2556	F	12		153	36	1599	15.3787	1599	7.995	24.4546	24.4477	1604.7	0.0446622	11.9553	0
A2557	F	12		140	35	1600	17.8571	1600	8	24.477	24.47	1312.2	-0.614157	12.6142	1
A2558	F	12		160	58	1600	22.6562	1600	8	24.477	24.47	1762.2	0.399411	11.6006	0
A2559	F	12		160	72	1600	28.125	1600	8	24.477	24.47	1762.2	0.399411	11.6006	0
A2560	F	12		161	51	1600	19.6752	1600	8	24.477	24.47	1784.7	0.450089	11.5499	0
A2561	F	12		146	45	1600	21.1109	1600	8	24.477	24.47	1447.2	-0.310087	12.3101	0
A2562	F	12		154	43	1600	18.1312	1600	8	24.477	24.47	1627.2	0.0953406	11.9047	0
A2563	F	12		154	43	1600	18.1312	1600	8	24.477	24.47	1627.2	0.0953406	11.9047	0
A2564	F	12		154	43	1600	18.1312	1600	8	24.477	24.47	1627.2	0.0953406	11.9047	0
A2565	F	12		154	43	1600	18.1312	1600	8	24.477	24.47	1627.2	0.0953406	11.9047	0
A2566	F	12		156	56	1600	23.0112	1600	8	24.477	24.47	1672.2	0.196697	11.8033	0
A2567	F	12		157	42	1600	17.0392	1600	8	24.477	24.47	1694.7	0.247376	11.7526	0
A2568	F	12		161	66	1600	25.462	1600	8	24.477	24.47	1784.7	0.450089	11.5499	0
A2569	F	12		161	51	1600	19.6752	1600	8	24.477	24.47	1784.7	0.450089	11.5499	0
A2570	F	12		146	45	1600	21.1109	1600	8	24.477	24.47	1447.2	-0.310087	12.3101	0
A2571	F	12		154	43	1600	18.1312	1600	8	24.477	24.47	1627.2	0.0953406	11.9047	0
A2572	F	12		154	43	1600	18.1312	1600	8	24.477	24.47	1627.2	0.0953406	11.9047	0
A2573	F	12		154	43	1600	18.1312	1600	8	24.477	24.47	1627.2	0.0953406	11.9047	0
A2574	F	12		154	43	1600	18.1312	1600	8	24.477	24.47	1627.2	0.0953406	11.9047	0
A2575	F	12		156	56	1600	23.0112	1600	8	24.477	24.47	1672.2	0.196697	11.8033	0
A2576	F	12		157	42	1600	17.0392	1600	8	24.477	24.47	1694.7	0.247376	11.7526	0
A2577	F	12		161	66	1600	25.462	1600	8	24.477	24.47	1784.7	0.450089	11.5499	0
A2578	F	12		154	43	1600	18.1312	1600	8	24.477	24.47	1627.2	0.0953406	11.9047	0
A2579	F	12		154	43	1600	18.1312	1600	8	24.477	24.47	1627.2	0.0953406	11.9047	0
A2580	F	12		154	43	1600	18.1312	1600	8	24.477	24.47	1627.2	0.0953406	11.9047	0
A2581	F	12		154	43	1600	18.1312	1600	8	24.477	24.47	1627.2	0.0953406	11.9047	0
A2582	F	12		157	42	1600	17.0392	1600	8	24.477	24.47	1694.7	0.247376	11.7526	0
A2583	F	12		160	48	1600	18.75	1600	8	24.477	24.47	1762.2	0.399411	11.6006	0
A2584	F	12		146	45	1600	21.1109	1600	8	24.477	24.47	1447.2	-0.310087	12.3101	0
A2585	F	12		146	55	1600	25.8022	1600	8	24.477	24.47	1447.2	-0.310087	12.3101	0
A2586	F	12		156	56	1600	23.0112	1600	8	24.477	24.47	1672.2	0.196697	11.8033	0
A2587	F	12		161	66	1600	25.462	1600	8	24.477	24.47	1784.7	0.450089	11.5499	0
A2588	F	12		167	59.2	1605	21.227	1605	8.025	24.5887	24.5817	1919.7	0.75416	11.2458	-1
A2589	F	12		167	59.2	1605	21.227	1605	8.025	24.5887	24.5817	1919.7	0.75416	11.2458	-1
A2590	F	12		167	59.2	1605	21.227	1605	8.025	24.5887	24.5817	1919.7	0.75416	11.2458	-1
A2591	F	12		163	51	1608	19.1953	1608	8.04	24.6558	24.6488	1829.7	0.551446	11.4486	-1
A2592	F	12		163	51	1608	19.1953	1608	8.04	24.6558	24.6488	1829.7	0.551446	11.4486	-1
A2593	F	12		163	51	1608	19.1953	1608	8.04	24.6558	24.6488	1829.7	0.551446	11.4486	-1
A2594	F	12		167	51	1610	18.2868	1610	8.05	24.7005	24.6935	1919.7	0.75416	11.2458	-1
A2595	F	12		167	51	1610	18.2868	1610	8.05	24.7005	24.6935	1919.7	0.75416	11.2458	-1
A2596	F	12		142	39.4	1610	19.5398	1610	8.05	24.7005	24.6935	1357.2	-0.5128	12.5128	1
A2597	F	12		168	53	1610	18.7783	1610	8.05	24.7005	24.6935	1942.2	0.804838	11.1952	-1
A2598	F	12		155	68	1610	28.3039	1610	8.05	24.7005	24.6935	1649.7	0.146019	11.854	0
A2599	F	12		167	51	1610	18.2868	1610	8.05	24.7005	24.6935	1919.7	0.75416	11.2458	-1
A2600	F	12		167	51	1610	18.2868	1610	8.05	24.7005	24.6935	1919.7	0.75416	11.2458	-1
A2601	F	12		142	39.4	1610	19.5398	1610	8.05	24.7005	24.6935	1357.2	-0.5128	12.5128	1
A2602	F	12		168	53	1610	18.7783	1610	8.05	24.7005	24.6935	1942.2	0.804838	11.1952	-1
A2603	F	12		168	53	1610	18.7783	1610	8.05	24.7005	24.6935	1942.2	0.804838	11.1952	-1
A2604	F	12		167	51	1610	18.2868	1610	8.05	24.7005	24.6935	1919.7	0.75416	11.2458	-1
A2605	F	12		167	51	1610	18.2868	1610	8.05	24.7005	24.6935	1919.7	0.75416	11.2458	-1
A2606	F	12		142	39.4	1610	19.5398	1610	8.05	24.7005	24.6935	1357.2	-0.5128	12.5128	1
A2607	F	12		155	68	1610	28.3039	1610	8.05	24.7005	24.6935	1649.7	0.146019	11.854	0
A2608	F	12		158	50	1611.94	20.0288	1611.94	8.0597	24.7439	24.7369	1717.2	0.298054	11.7019	0
A2609	F	12		152	51	1611.94	22.0741	1611.94	8.0597	24.7439	24.7369	1582.2	-0.0060162	12.006	0
A2610	F	12		157	52	1612	21.0962	1612	8.06	24.7452	24.7382	1694.7	0.247376	11.7526	0
A2611	F	12		156	62.5	1614	25.6821	1614	8.07	24.7899	24.7829	1672.2	0.196697	11.8033	0
A2612	F	12		156	62.5	1614	25.6821	1614	8.07	24.7899	24.7829	1672.2	0.196697	11.8033	0
A2613	F	12		154	51	1615.96	21.5045	1615.96	8.0798	24.8337	24.8267	1627.2	0.0953406	11.9047	0
A2614	F	12		146	45	1620	20.9702	1620	8.1	24.924	24.917	1447.2	-0.310087	12.3101	0
A2615	F	12		144	48.1	1620	23.1964	1620	8.1	24.924	24.917	1402.2	-0.411443	12.4114	0
A2616	F	12		147	33	1620	15.2714	1620	8.1	24.924	24.917	1469.7	-0.259408	12.2594	0
A2617	F	12		146	45	1620	20.9702	1620	8.1	24.924	24.917	1447.2	-0.310087	12.3101	0
A2618	F	12		144	48.1	1620	23.1964	1620	8.1	24.924	24.917	1402.2	-0.411443	12.4114	0
A2619	F	12		150	45	1620	20	1620	8.1	24.924	24.917	1537.2	-0.107373	12.1074	0
A2620	F	12		144	48.1	1620	23.1964	1620	8.1	24.924	24.917	1402.2	-0.411443	12.4114	0
A2621	F	12		147	33	1620	15.2714	1620	8.1	24.924	24.917	1469.7	-0.259408	12.2594	0
A2622	F	12		146	40	1622	18.7652	1622	8.11	24.9687	24.9617	1447.2	-0.310087	12.3101	0
A2623	F	12		165	64.5	1623	23.6915	1623	8.115	24.9911	24.9841	1874.7	0.652803	11.3472	-1
A2624	F	12		146	44	1624	20.6418	1624	8.12	25.0134	25.0064	1447.2	-0.310087	12.3101	0
A2625	F	12		152	44.2	1624	19.1309	1624	8.12	25.0134	25.0064	1582.2	-0.0060162	12.006	0
A2626	F	12		169	71	1624	24.8591	1624	8.12	25.0134	25.0064	1964.7	0.855517	11.1445	-1
A2627	F	12		146	44	1624	20.6418	1624	8.12	25.0134	25.0064	1447.2	-0.310087	12.3101	0
A2628	F	12		152	44.2	1624	19.1309	1624	8.12	25.0134	25.0064	1582.2	-0.0060162	12.006	0
A2629	F	12		169	71	1624	24.8591	1624	8.12	25.0134	25.0064	1964.7	0.855517	11.1445	-1
A2630	F	12		152	44.2	1624	19.1309	1624	8.12	25.0134	25.0064	1582.2	-0.0060162	12.006	0
A2631	F	12		169	71	1624	24.8591	1624	8.12	25.0134	25.0064	1964.7	0.855517	11.1445	-1
A2632	F	12		146	44	1624	20.6418	1624	8.12	25.0134	25.0064	1447.2	-0.310087	12.3101	0
A2633	F	12		163	70.1	1626	26.3841	1626	8.13	25.0581	25.0511	1829.7	0.551446	11.4486	-1
A2634	F	12		163	70.1	1626	26.3841	1626	8.13	25.0581	25.0511	1829.7	0.551446	11.4486	-1
A2635	F	12		157	40	1627	16.2278	1627	8.135	25.0805	25.0735	1694.7	0.247376	11.7526	0
A2636	F	12		157	40	1627	16.2278	1627	8.135	25.0805	25.0735	1694.7	0.247376	11.7526	0
A2637	F	12		157	40	1627	16.2278	1627	8.135	25.0805	25.0735	1694.7	0.247376	11.7526	0
A2638	F	12		159	56	1628.14	22.151	1628.14	8.1407	25.106	25.0989	1739.7	0.348733	11.6513	0
A2639	F	12		163	53	1630	19.9481	1630	8.15	25.1475	25.1405	1829.7	0.551446	11.4486	-1
A2640	F	12		163	53	1630	19.9481	1630	8.15	25.1475	25.1405	1829.7	0.551446	11.4486	-1
A2641	F	12		163	53	1630	19.9481	1630	8.15	25.1475	25.1405	1829.7	0.551446	11.4486	-1
A2642	F	12		163	53	1630	19.9481	1630	8.15	25.1475	25.1405	1829.7	0.551446	11.4486	-1
A2643	F	12		163	53	1630	19.9481	1630	8.15	25.1475	25.1405	1829.7	0.551446	11.4486	-1
A2644	F	12		163	53	1630	19.9481	1630	8.15	25.1475	25.1405	1829.7	0.551446	11.4486	-1
A2645	F	12		163	53	1630	19.9481	1630	8.15	25.1475	25.1405	1829.7	0.551446	11.4486	-1
A2646	F	12		163	53	1630	19.9481	1630	8.15	25.1475	25.1405	1829.7	0.551446	11.4486	-1
A2647	F	12		163	53	1630	19.9481	1630	8.15	25.1475	25.1405	1829.7	0.551446	11.4486	-1
A2648	F	12		163	53	1630	19.9481	1630	8.15	25.1475	25.1405	1829.7	0.551446	11.4486	-1
A2649	F	12		163	53	1630	19.9481	1630	8.15	25.1475	25.1405	1829.7	0.551446	11.4486	-1
A2650	F	12		163	53	1630	19.9481	1630	8.15	25.1475	25.1405	1829.7	0.551446	11.4486	-1
A2651	F	12		162	63	1632	24.0055	1632	8.16	25.1922	25.1852	1807.2	0.500768	11.4992	-1
A2652	F	12		156	46	1635	18.902	1635	8.175	25.2593	25.2523	1672.2	0.196697	11.8033	0
A2653	F	12		156	46	1635	18.902	1635	8.175	25.2593	25.2523	1672.2	0.196697	11.8033	0
A2654	F	12		156	46	1635	18.902	1635	8.175	25.2593	25.2523	1672.2	0.196697	11.8033	0
A2655	F	12		151	53	1638	23.3323	1638	8.19	25.3263	25.3193	1559.7	-0.0566946	12.0567	0
A2656	F	12		151	53	1638	23.3323	1638	8.19	25.3263	25.3193	1559.7	-0.0566946	12.0567	0
A2657	F	12		150	41	1640.51	18.2222	1640.51	8.20253	25.3823	25.3753	1537.2	-0.107373	12.1074	0
A2658	F	12		160	53	1640.51	20.7031	1640.51	8.20253	25.3823	25.3753	1762.2	0.399411	11.6006	0
A2659	F	12		159	43	1645	17.0088	1645	8.225	25.4828	25.4758	1739.7	0.348733	11.6513	0
A2660	F	12		159	43	1645	17.0088	1645	8.225	25.4828	25.4758	1739.7	0.348733	11.6513	0
A2661	F	12		159	43	1645	17.0088	1645	8.225	25.4828	25.4758	1739.7	0.348733	11.6513	0
A2662	F	12		161	46.2	1647	17.8234	1647	8.235	25.5275	25.5205	1784.7	0.450089	11.5499	0
A2663	F	12		158	60.8	1647	24.3551	1647	8.235	25.5275	25.5205	1717.2	0.298054	11.7019	0
A2664	F	12		161	46.2	1647	17.8234	1647	8.235	25.5275	25.5205	1784.7	0.450089	11.5499	0
A2665	F	12		158	60.8	1647	24.3551	1647	8.235	25.5275	25.5205	1717.2	0.298054	11.7019	0
A2666	F	12		158	60.8	1647	24.3551	1647	8.235	25.5275	25.5205	1717.2	0.298054	11.7019	0
A2667	F	12		161	46.2	1647	17.8234	1647	8.235	25.5275	25.5205	1784.7	0.450089	11.5499	0
A2668	F	12		151	43	1650	18.6395	1650	8.25	25.5945	25.5875	1559.7	-0.0566946	12.0567	0
A2669	F	12		160	65	1650	25.4321	1650	8.25	25.5945	25.5875	1762.2	0.399411	11.6006	0
A2670	F	12		151	43	1650	18.6395	1650	8.25	25.5945	25.5875	1559.7	-0.0566946	12.0567	0
A2671	F	12		160	65	1650	25.4321	1650	8.25	25.5945	25.5875	1762.2	0.399411	11.6006	0
A2672	F	12		171	45	1651	15.3894	1651	8.255	25.6169	25.6099	2009.7	0.956873	11.0431	-1
A2673	F	12		154	38	1660	16.1916	1660	8.3	25.8181	25.811	1627.2	0.0953406	11.9047	0
A2674	F	12		148	51	1660	23.2834	1660	8.3	25.8181	25.811	1492.2	-0.20873	12.2087	0
A2675	F	12		163	58	1660	21.83	1660	8.3	25.8181	25.811	1829.7	0.551446	11.4486	-1
A2676	F	12		154	38	1660	16.1916	1660	8.3	25.8181	25.811	1627.2	0.0953406	11.9047	0
A2677	F	12		148	51	1660	23.2834	1660	8.3	25.8181	25.811	1492.2	-0.20873	12.2087	0
A2678	F	12		163	58	1660	21.83	1660	8.3	25.8181	25.811	1829.7	0.551446	11.4486	-1
A2679	F	12		148	51	1660	23.2834	1660	8.3	25.8181	25.811	1492.2	-0.20873	12.2087	0
A2680	F	12		163	58	1660	21.83	1660	8.3	25.8181	25.811	1829.7	0.551446	11.4486	-1
A2681	F	12		149	39.9	1661	17.9722	1661	8.305	25.8404	25.8334	1514.7	-0.158051	12.1581	0
A2682	F	12		163	42.9	1661	16.1466	1661	8.305	25.8404	25.8334	1829.7	0.551446	11.4486	-1
A2683	F	12		149	39.9	1661	17.9722	1661	8.305	25.8404	25.8334	1514.7	-0.158051	12.1581	0
A2684	F	12		163	42.9	1661	16.1466	1661	8.305	25.8404	25.8334	1829.7	0.551446	11.4486	-1
A2685	F	12		163	42.9	1661	16.1466	1661	8.305	25.8404	25.8334	1829.7	0.551446	11.4486	-1
A2686	F	12		149	39.9	1661	17.9722	1661	8.305	25.8404	25.8334	1514.7	-0.158051	12.1581	0
A2687	F	12		154	53.6	1665	22.6008	1665	8.325	25.9298	25.9228	1627.2	0.0953406	11.9047	0
A2688	F	12		154	53.6	1665	22.6008	1665	8.325	25.9298	25.9228	1627.2	0.0953406	11.9047	0
A2689	F	12		154	53.6	1665	22.6008	1665	8.325	25.9298	25.9228	1627.2	0.0953406	11.9047	0
A2690	F	12		160	62	1670	24.1797	1670	8.35	26.0416	26.0345	1762.2	0.399411	11.6006	0
A2691	F	12		168	70	1670	24.837	1670	8.35	26.0416	26.0345	1942.2	0.804838	11.1952	-1
A2692	F	12		150	33.1	1670	14.7111	1670	8.35	26.0416	26.0345	1537.2	-0.107373	12.1074	0
A2693	F	12		150	33.1	1670	14.7111	1670	8.35	26.0416	26.0345	1537.2	-0.107373	12.1074	0
A2694	F	12		160	62	1670	24.1797	1670	8.35	26.0416	26.0345	1762.2	0.399411	11.6006	0
A2695	F	12		168	70	1670	24.837	1670	8.35	26.0416	26.0345	1942.2	0.804838	11.1952	-1
A2696	F	12		150	33.1	1670	14.7111	1670	8.35	26.0416	26.0345	1537.2	-0.107373	12.1074	0
A2697	F	12		150	33.1	1670	14.7111	1670	8.35	26.0416	26.0345	1537.2	-0.107373	12.1074	0
A2698	F	12		160	53.8	1674	21.0156	1674	8.37	26.131	26.1239	1762.2	0.399411	11.6006	0
A2699	F	12		155	45	1674	18.7305	1674	8.37	26.131	26.1239	1649.7	0.146019	11.854	0
A2700	F	12		160	53.8	1674	21.0156	1674	8.37	26.131	26.1239	1762.2	0.399411	11.6006	0
A2701	F	12		155	45	1674	18.7305	1674	8.37	26.131	26.1239	1649.7	0.146019	11.854	0
A2702	F	12		148	51	1674	23.2834	1674	8.37	26.131	26.1239	1492.2	-0.20873	12.2087	0
A2703	F	12		155	45	1674	18.7305	1674	8.37	26.131	26.1239	1649.7	0.146019	11.854	0
A2704	F	12		160	53.8	1674	21.0156	1674	8.37	26.131	26.1239	1762.2	0.399411	11.6006	0
A2705	F	12		153	40	1677	17.0874	1677	8.385	26.198	26.191	1604.7	0.0446622	11.9553	0
A2706	F	12		153	40	1677	17.0874	1677	8.385	26.198	26.191	1604.7	0.0446622	11.9553	0
A2707	F	12		153	40	1677	17.0874	1677	8.385	26.198	26.191	1604.7	0.0446622	11.9553	0
A2708	F	12		156	53	1680	21.6552	1680	8.4	26.2651	26.258	1672.2	0.196697	11.8033	0
A2709	F	12		154	42	1680	17.7096	1680	8.4	26.2651	26.258	1627.2	0.0953406	11.9047	0
A2710	F	12		156	39	1680	16.0256	1680	8.4	26.2651	26.258	1672.2	0.196697	11.8033	0
A2711	F	12		155	37	1680	15.4006	1680	8.4	26.2651	26.258	1649.7	0.146019	11.854	0
A2712	F	12		156	53	1680	21.6552	1680	8.4	26.2651	26.258	1672.2	0.196697	11.8033	0
A2713	F	12		154	42	1680	17.7096	1680	8.4	26.2651	26.258	1627.2	0.0953406	11.9047	0
A2714	F	12		156	39	1680	16.0256	1680	8.4	26.2651	26.258	1672.2	0.196697	11.8033	0
A2715	F	12		156	39	1680	16.0256	1680	8.4	26.2651	26.258	1672.2	0.196697	11.8033	0
A2716	F	12		155	37	1680	15.4006	1680	8.4	26.2651	26.258	1649.7	0.146019	11.854	0
A2717	F	12		154	42	1680	17.7096	1680	8.4	26.2651	26.258	1627.2	0.0953406	11.9047	0
A2718	F	12		154	43	1681	17.9204	1681	8.405	26.2874	26.2804	1627.2	0.0953406	11.9047	0
A2719	F	12		160	49	1681	19.1406	1681	8.405	26.2874	26.2804	1762.2	0.399411	11.6006	0
A2720	F	12		160	49	1681	19.1406	1681	8.405	26.2874	26.2804	1762.2	0.399411	11.6006	0
A2721	F	12		154	43	1681	17.9204	1681	8.405	26.2874	26.2804	1627.2	0.0953406	11.9047	0
A2722	F	12		160	49	1681	19.1406	1681	8.405	26.2874	26.2804	1762.2	0.399411	11.6006	0
A2723	F	12		160	49	1681	19.1406	1681	8.405	26.2874	26.2804	1762.2	0.399411	11.6006	0
A2724	F	12		157	46	1683	18.662	1683	8.415	26.3321	26.3251	1694.7	0.247376	11.7526	0
A2725	F	12		168	46	1683.12	16.2982	1683.12	8.41558	26.3348	26.3277	1942.2	0.804838	11.1952	-1
A2726	F	12		165	58	1683.12	21.3039	1683.12	8.41558	26.3348	26.3277	1874.7	0.652803	11.3472	-1
A2727	F	12		167	76	1683.12	27.2509	1683.12	8.41558	26.3348	26.3277	1919.7	0.75416	11.2458	-1
A2728	F	12		151	39	1684	17.1045	1684	8.42	26.3545	26.3474	1559.7	-0.0566946	12.0567	0
A2729	F	12		151	39	1684	17.1045	1684	8.42	26.3545	26.3474	1559.7	-0.0566946	12.0567	0
A2730	F	12		151	39	1684	17.1045	1684	8.42	26.3545	26.3474	1559.7	-0.0566946	12.0567	0
A2731	F	12		151	39	1684	17.1045	1684	8.42	26.3545	26.3474	1559.7	-0.0566946	12.0567	0
A2732	F	12		160	49	1686	19.1406	1686	8.43	26.3992	26.3921	1762.2	0.399411	11.6006	0
A2733	F	12		160	49	1686	19.1406	1686	8.43	26.3992	26.3921	1762.2	0.399411	11.6006	0
A2734	F	12		155	45.2	1688	18.8137	1688	8.44	26.4439	26.4368	1649.7	0.146019	11.854	0
A2735	F	12		166	45.9	1688	16.657	1688	8.44	26.4439	26.4368	1897.2	0.703481	11.2965	-1
A2736	F	12		155	45.2	1688	18.8137	1688	8.44	26.4439	26.4368	1649.7	0.146019	11.854	0
A2737	F	12		166	45.9	1688	16.657	1688	8.44	26.4439	26.4368	1897.2	0.703481	11.2965	-1
A2738	F	12		166	45.9	1688	16.657	1688	8.44	26.4439	26.4368	1897.2	0.703481	11.2965	-1
A2739	F	12		155	45.2	1688	18.8137	1688	8.44	26.4439	26.4368	1649.7	0.146019	11.854	0
A2740	F	12		163	62	1690	23.3355	1690	8.45	26.4886	26.4815	1829.7	0.551446	11.4486	-1
A2741	F	12		160	42	1692	16.4062	1692	8.46	26.5333	26.5262	1762.2	0.399411	11.6006	0
A2742	F	12		160	42	1692	16.4062	1692	8.46	26.5333	26.5262	1762.2	0.399411	11.6006	0
A2743	F	12		160	42	1692	16.4062	1692	8.46	26.5333	26.5262	1762.2	0.399411	11.6006	0
A2744	F	12		165	56	1696	20.4224	1696	8.48	26.6227	26.6156	1874.7	0.652803	11.3472	-1
A2745	F	12		165	56	1696	20.4224	1696	8.48	26.6227	26.6156	1874.7	0.652803	11.3472	-1
A2746	F	12		147	37	1697	17.1225	1697	8.485	26.6451	26.638	1469.7	-0.259408	12.2594	0
A2747	F	12		149	60	1698	27.0258	1698	8.49	26.6674	26.6603	1514.7	-0.158051	12.1581	0
A2748	F	12		153	52	1700	22.0001	1700	8.5	26.7121	26.705	1604.7	0.0446622	11.9553	0
A2749	F	12		155	46	1700	19.1467	1700	8.5	26.7121	26.705	1649.7	0.146019	11.854	0
A2750	F	12		163	49	1700	18.4425	1700	8.5	26.7121	26.705	1829.7	0.551446	11.4486	-1
A2751	F	12		157	36	1700	14.6051	1700	8.5	26.7121	26.705	1694.7	0.247376	11.7526	0
A2752	F	12		153	52	1700	22.0001	1700	8.5	26.7121	26.705	1604.7	0.0446622	11.9553	0
A2753	F	12		155	46	1700	19.1467	1700	8.5	26.7121	26.705	1649.7	0.146019	11.854	0
A2754	F	12		163	49	1700	18.4425	1700	8.5	26.7121	26.705	1829.7	0.551446	11.4486	-1
A2755	F	12		157	36	1700	14.6051	1700	8.5	26.7121	26.705	1694.7	0.247376	11.7526	0
A2756	F	12		161	56.6	1701	21.8356	1701	8.505	26.7345	26.7274	1784.7	0.450089	11.5499	0
A2757	F	12		145	50.5	1701	24.019	1701	8.505	26.7345	26.7274	1424.7	-0.360765	12.3608	0
A2758	F	12		166	50.4	1701	18.29	1701	8.505	26.7345	26.7274	1897.2	0.703481	11.2965	-1
A2759	F	12		161	56.6	1701	21.8356	1701	8.505	26.7345	26.7274	1784.7	0.450089	11.5499	0
A2760	F	12		145	50.5	1701	24.019	1701	8.505	26.7345	26.7274	1424.7	-0.360765	12.3608	0
A2761	F	12		166	50.4	1701	18.29	1701	8.505	26.7345	26.7274	1897.2	0.703481	11.2965	-1
A2762	F	12		166	50.4	1701	18.29	1701	8.505	26.7345	26.7274	1897.2	0.703481	11.2965	-1
A2763	F	12		145	50.5	1701	24.019	1701	8.505	26.7345	26.7274	1424.7	-0.360765	12.3608	0
A2764	F	12		161	56.6	1701	21.8356	1701	8.505	26.7345	26.7274	1784.7	0.450089	11.5499	0
A2765	F	12		161	51	1703	19.6752	1703	8.515	26.7792	26.7721	1784.7	0.450089	11.5499	0
A2766	F	12		161	51	1703	19.6752	1703	8.515	26.7792	26.7721	1784.7	0.450089	11.5499	0
A2767	F	12		161	51	1703	19.6752	1703	8.515	26.7792	26.7721	1784.7	0.450089	11.5499	0
A2768	F	12		154	39	1708	16.4446	1708	8.54	26.8909	26.8838	1627.2	0.0953406	11.9047	0
A2769	F	12		154	39	1708	16.4446	1708	8.54	26.8909	26.8838	1627.2	0.0953406	11.9047	0
A2770	F	12		154	39	1708	16.4446	1708	8.54	26.8909	26.8838	1627.2	0.0953406	11.9047	0
A2771	F	12		158	42	1710	16.8242	1710	8.55	26.9356	26.9285	1717.2	0.298054	11.7019	0
A2772	F	12		158	42	1710	16.8242	1710	8.55	26.9356	26.9285	1717.2	0.298054	11.7019	0
A2773	F	12		158	46	1715	18.4265	1715	8.575	27.0474	27.0403	1717.2	0.298054	11.7019	0
A2774	F	12		163	51.2	1715	19.2706	1715	8.575	27.0474	27.0403	1829.7	0.551446	11.4486	-1
A2775	F	12		170	55.4	1715	19.1696	1715	8.575	27.0474	27.0403	1987.2	0.906195	11.0938	-1
A2776	F	12		171	47.5	1715	16.2443	1715	8.575	27.0474	27.0403	2009.7	0.956873	11.0431	-1
A2777	F	12		158	46	1715	18.4265	1715	8.575	27.0474	27.0403	1717.2	0.298054	11.7019	0
A2778	F	12		163	51.2	1715	19.2706	1715	8.575	27.0474	27.0403	1829.7	0.551446	11.4486	-1
A2779	F	12		170	55.4	1715	19.1696	1715	8.575	27.0474	27.0403	1987.2	0.906195	11.0938	-1
A2780	F	12		171	47.5	1715	16.2443	1715	8.575	27.0474	27.0403	2009.7	0.956873	11.0431	-1
A2781	F	12		163	51.2	1715	19.2706	1715	8.575	27.0474	27.0403	1829.7	0.551446	11.4486	-1
A2782	F	12		158	46	1715	18.4265	1715	8.575	27.0474	27.0403	1717.2	0.298054	11.7019	0
A2783	F	12		171	47.5	1715	16.2443	1715	8.575	27.0474	27.0403	2009.7	0.956873	11.0431	-1
A2784	F	12		170	55.4	1715	19.1696	1715	8.575	27.0474	27.0403	1987.2	0.906195	11.0938	-1
A2785	F	12		155	51.7	1718	21.5193	1718	8.59	27.1144	27.1073	1649.7	0.146019	11.854	0
A2786	F	12		155	51.7	1718	21.5193	1718	8.59	27.1144	27.1073	1649.7	0.146019	11.854	0
A2787	F	12		161	46.7	1718	18.0163	1718	8.59	27.1144	27.1073	1784.7	0.450089	11.5499	0
A2788	F	12		155	51.7	1718	21.5193	1718	8.59	27.1144	27.1073	1649.7	0.146019	11.854	0
A2789	F	12		152	40	1718.83	17.313	1718.83	8.59416	27.1331	27.1259	1582.2	-0.0060162	12.006	0
A2790	F	12		150	49	1720	21.7778	1720	8.6	27.1591	27.152	1537.2	-0.107373	12.1074	0
A2791	F	12		150	49	1720	21.7778	1720	8.6	27.1591	27.152	1537.2	-0.107373	12.1074	0
A2792	F	12		150	49	1720	21.7778	1720	8.6	27.1591	27.152	1537.2	-0.107373	12.1074	0
A2793	F	12		166.5	75	1722	27.0541	1722	8.61	27.2038	27.1967	1908.45	0.728821	11.2712	-1
A2794	F	12		163	58	1728	21.83	1728	8.64	27.338	27.3308	1829.7	0.551446	11.4486	-1
A2795	F	12		144	45	1728	21.7014	1728	8.64	27.338	27.3308	1402.2	-0.411443	12.4114	0
A2796	F	12		152	39	1732	16.8802	1732	8.66	27.4274	27.4202	1582.2	-0.0060162	12.006	0
A2797	F	12		152	39	1732	16.8802	1732	8.66	27.4274	27.4202	1582.2	-0.0060162	12.006	0
A2798	F	12		152	39	1732	16.8802	1732	8.66	27.4274	27.4202	1582.2	-0.0060162	12.006	0
A2799	F	12		150	40	1732.62	17.7778	1732.62	8.6631	27.4412	27.4341	1537.2	-0.107373	12.1074	0
A2800	F	12		151	38.6	1733	16.9291	1733	8.665	27.4497	27.4426	1559.7	-0.0566946	12.0567	0
A2801	F	12		149	33	1733	14.8642	1733	8.665	27.4497	27.4426	1514.7	-0.158051	12.1581	0
A2802	F	12		151	38.6	1733	16.9291	1733	8.665	27.4497	27.4426	1559.7	-0.0566946	12.0567	0
A2803	F	12		151	38.6	1733	16.9291	1733	8.665	27.4497	27.4426	1559.7	-0.0566946	12.0567	0
A2804	F	12		163	54	1733	20.3244	1733	8.665	27.4497	27.4426	1829.7	0.551446	11.4486	-1
A2805	F	12		149	33	1733	14.8642	1733	8.665	27.4497	27.4426	1514.7	-0.158051	12.1581	0
A2806	F	12		160	56	1740	21.7969	1740	8.7	27.6062	27.599	1762.2	0.399411	11.6006	0
A2807	F	12		149	42	1740	18.9181	1740	8.7	27.6062	27.599	1514.7	-0.158051	12.1581	0
A2808	F	12		160	56	1740	21.7969	1740	8.7	27.6062	27.599	1762.2	0.399411	11.6006	0
A2809	F	12		149	42	1740	18.9181	1740	8.7	27.6062	27.599	1514.7	-0.158051	12.1581	0
A2810	F	12		149	42	1740	18.9181	1740	8.7	27.6062	27.599	1514.7	-0.158051	12.1581	0
A2811	F	12		157	48	1741.94	19.4734	1741.94	8.70968	27.6494	27.6423	1694.7	0.247376	11.7526	0
A2812	F	12		140	30	1742	15.3061	1742	8.71	27.6509	27.6437	1312.2	-0.614157	12.6142	1
A2813	F	12		140	30	1742	15.3061	1742	8.71	27.6509	27.6437	1312.2	-0.614157	12.6142	1
A2814	F	12		156	41.7	1743	17.1351	1743	8.715	27.6732	27.6661	1672.2	0.196697	11.8033	0
A2815	F	12		156	41.7	1743	17.1351	1743	8.715	27.6732	27.6661	1672.2	0.196697	11.8033	0
A2816	F	12		143	58.9	1743	28.8034	1743	8.715	27.6732	27.6661	1379.7	-0.462122	12.4621	0
A2817	F	12		156	41.7	1743	17.1351	1743	8.715	27.6732	27.6661	1672.2	0.196697	11.8033	0
A2818	F	12		150	40	1745	17.7778	1745	8.725	27.7179	27.7108	1537.2	-0.107373	12.1074	0
A2819	F	12		158	63	1745	25.2363	1745	8.725	27.7179	27.7108	1717.2	0.298054	11.7019	0
A2820	F	12		150	40	1745	17.7778	1745	8.725	27.7179	27.7108	1537.2	-0.107373	12.1074	0
A2821	F	12		158	63	1745	25.2363	1745	8.725	27.7179	27.7108	1717.2	0.298054	11.7019	0
A2822	F	12		150	40	1745	17.7778	1745	8.725	27.7179	27.7108	1537.2	-0.107373	12.1074	0
A2823	F	12		158	63	1745	25.2363	1745	8.725	27.7179	27.7108	1717.2	0.298054	11.7019	0
A2824	F	12		156	42	1746	17.094	1746	8.73	27.7403	27.7331	1672.2	0.196697	11.8033	0
A2825	F	12		156	42	1746	17.094	1746	8.73	27.7403	27.7331	1672.2	0.196697	11.8033	0
A2826	F	12		146	41	1750	19.0467	1750	8.75	27.8297	27.8225	1447.2	-0.310087	12.3101	0
A2827	F	12		153	46	1750	19.5224	1750	8.75	27.8297	27.8225	1604.7	0.0446622	11.9553	0
A2828	F	12		154	43	1750	18.1312	1750	8.75	27.8297	27.8225	1627.2	0.0953406	11.9047	0
A2829	F	12		154	43	1750	18.1312	1750	8.75	27.8297	27.8225	1627.2	0.0953406	11.9047	0
A2830	F	12		154	43	1750	18.1312	1750	8.75	27.8297	27.8225	1627.2	0.0953406	11.9047	0
A2831	F	12		154	43	1750	18.1312	1750	8.75	27.8297	27.8225	1627.2	0.0953406	11.9047	0
A2832	F	12		155	51.5	1750	21.436	1750	8.75	27.8297	27.8225	1649.7	0.146019	11.854	0
A2833	F	12		158	41	1750	16.4237	1750	8.75	27.8297	27.8225	1717.2	0.298054	11.7019	0
A2834	F	12		165	43	1750	15.7943	1750	8.75	27.8297	27.8225	1874.7	0.652803	11.3472	-1
A2835	F	12		165	43	1750	15.7943	1750	8.75	27.8297	27.8225	1874.7	0.652803	11.3472	-1
A2836	F	12		165	43	1750	15.7943	1750	8.75	27.8297	27.8225	1874.7	0.652803	11.3472	-1
A2837	F	12		165	43	1750	15.7943	1750	8.75	27.8297	27.8225	1874.7	0.652803	11.3472	-1
A2838	F	12		165	43	1750	15.7943	1750	8.75	27.8297	27.8225	1874.7	0.652803	11.3472	-1
A2839	F	12		165	43	1750	15.7943	1750	8.75	27.8297	27.8225	1874.7	0.652803	11.3472	-1
A2840	F	12		165	43	1750	15.7943	1750	8.75	27.8297	27.8225	1874.7	0.652803	11.3472	-1
A2841	F	12		146	41	1750	19.0467	1750	8.75	27.8297	27.8225	1447.2	-0.310087	12.3101	0
A2842	F	12		153	46	1750	19.5224	1750	8.75	27.8297	27.8225	1604.7	0.0446622	11.9553	0
A2843	F	12		154	43	1750	18.1312	1750	8.75	27.8297	27.8225	1627.2	0.0953406	11.9047	0
A2844	F	12		154	43	1750	18.1312	1750	8.75	27.8297	27.8225	1627.2	0.0953406	11.9047	0
A2845	F	12		154	43	1750	18.1312	1750	8.75	27.8297	27.8225	1627.2	0.0953406	11.9047	0
A2846	F	12		154	43	1750	18.1312	1750	8.75	27.8297	27.8225	1627.2	0.0953406	11.9047	0
A2847	F	12		155	51.5	1750	21.436	1750	8.75	27.8297	27.8225	1649.7	0.146019	11.854	0
A2848	F	12		158	41	1750	16.4237	1750	8.75	27.8297	27.8225	1717.2	0.298054	11.7019	0
A2849	F	12		165	43	1750	15.7943	1750	8.75	27.8297	27.8225	1874.7	0.652803	11.3472	-1
A2850	F	12		165	43	1750	15.7943	1750	8.75	27.8297	27.8225	1874.7	0.652803	11.3472	-1
A2851	F	12		165	43	1750	15.7943	1750	8.75	27.8297	27.8225	1874.7	0.652803	11.3472	-1
A2852	F	12		165	43	1750	15.7943	1750	8.75	27.8297	27.8225	1874.7	0.652803	11.3472	-1
A2853	F	12		165	43	1750	15.7943	1750	8.75	27.8297	27.8225	1874.7	0.652803	11.3472	-1
A2854	F	12		165	43	1750	15.7943	1750	8.75	27.8297	27.8225	1874.7	0.652803	11.3472	-1
A2855	F	12		165	43	1750	15.7943	1750	8.75	27.8297	27.8225	1874.7	0.652803	11.3472	-1
A2856	F	12		165	43	1750	15.7943	1750	8.75	27.8297	27.8225	1874.7	0.652803	11.3472	-1
A2857	F	12		165	43	1750	15.7943	1750	8.75	27.8297	27.8225	1874.7	0.652803	11.3472	-1
A2858	F	12		165	43	1750	15.7943	1750	8.75	27.8297	27.8225	1874.7	0.652803	11.3472	-1
A2859	F	12		165	43	1750	15.7943	1750	8.75	27.8297	27.8225	1874.7	0.652803	11.3472	-1
A2860	F	12		154	43	1750	18.1312	1750	8.75	27.8297	27.8225	1627.2	0.0953406	11.9047	0
A2861	F	12		165	43	1750	15.7943	1750	8.75	27.8297	27.8225	1874.7	0.652803	11.3472	-1
A2862	F	12		154	43	1750	18.1312	1750	8.75	27.8297	27.8225	1627.2	0.0953406	11.9047	0
A2863	F	12		158	41	1750	16.4237	1750	8.75	27.8297	27.8225	1717.2	0.298054	11.7019	0
A2864	F	12		165	43	1750	15.7943	1750	8.75	27.8297	27.8225	1874.7	0.652803	11.3472	-1
A2865	F	12		154	43	1750	18.1312	1750	8.75	27.8297	27.8225	1627.2	0.0953406	11.9047	0
A2866	F	12		165	43	1750	15.7943	1750	8.75	27.8297	27.8225	1874.7	0.652803	11.3472	-1
A2867	F	12		154	43	1750	18.1312	1750	8.75	27.8297	27.8225	1627.2	0.0953406	11.9047	0
A2868	F	12		155	51.5	1750	21.436	1750	8.75	27.8297	27.8225	1649.7	0.146019	11.854	0
A2869	F	12		161	49	1751	18.9036	1751	8.755	27.852	27.8449	1784.7	0.450089	11.5499	0
A2870	F	12		161	49	1751	18.9036	1751	8.755	27.852	27.8449	1784.7	0.450089	11.5499	0
A2871	F	12		161	49	1751	18.9036	1751	8.755	27.852	27.8449	1784.7	0.450089	11.5499	0
A2872	F	12		155	38	1752	15.6087	1752	8.76	27.8744	27.8672	1649.7	0.146019	11.854	0
A2873	F	12		155	38	1752	15.6087	1752	8.76	27.8744	27.8672	1649.7	0.146019	11.854	0
A2874	F	12		152	43.8	1755	18.9578	1755	8.775	27.9414	27.9342	1582.2	-0.0060162	12.006	0
A2875	F	12		152	43.8	1755	18.9578	1755	8.775	27.9414	27.9342	1582.2	-0.0060162	12.006	0
A2876	F	12		152	43.8	1755	18.9578	1755	8.775	27.9414	27.9342	1582.2	-0.0060162	12.006	0
A2877	F	12		153	40.7	1763	17.3865	1763	8.815	28.1203	28.1131	1604.7	0.0446622	11.9553	0
A2878	F	12		153	40.7	1763	17.3865	1763	8.815	28.1203	28.1131	1604.7	0.0446622	11.9553	0
A2879	F	12		153	40.7	1763	17.3865	1763	8.815	28.1203	28.1131	1604.7	0.0446622	11.9553	0
A2880	F	12		156	48.7	1769	20.0115	1769	8.845	28.2544	28.2471	1672.2	0.196697	11.8033	0
A2881	F	12		156	48.7	1769	20.0115	1769	8.845	28.2544	28.2471	1672.2	0.196697	11.8033	0
A2882	F	12		156	48.7	1769	20.0115	1769	8.845	28.2544	28.2471	1672.2	0.196697	11.8033	0
A2883	F	12		148	40	1770	18.2615	1770	8.85	28.2767	28.2695	1492.2	-0.20873	12.2087	0
A2884	F	12		166	59.6	1770	21.6287	1770	8.85	28.2767	28.2695	1897.2	0.703481	11.2965	-1
A2885	F	12		148	40	1770	18.2615	1770	8.85	28.2767	28.2695	1492.2	-0.20873	12.2087	0
A2886	F	12		166	59.6	1770	21.6287	1770	8.85	28.2767	28.2695	1897.2	0.703481	11.2965	-1
A2887	F	12		148	40	1770	18.2615	1770	8.85	28.2767	28.2695	1492.2	-0.20873	12.2087	0
A2888	F	12		166	59.6	1770	21.6287	1770	8.85	28.2767	28.2695	1897.2	0.703481	11.2965	-1
A2889	F	12		148	39	1772	17.805	1772	8.86	28.3214	28.3142	1492.2	-0.20873	12.2087	0
A2890	F	12		154	46	1772	19.3962	1772	8.86	28.3214	28.3142	1627.2	0.0953406	11.9047	0
A2891	F	12		148	39	1772	17.805	1772	8.86	28.3214	28.3142	1492.2	-0.20873	12.2087	0
A2892	F	12		154	46	1772	19.3962	1772	8.86	28.3214	28.3142	1627.2	0.0953406	11.9047	0
A2893	F	12		154	46	1772	19.3962	1772	8.86	28.3214	28.3142	1627.2	0.0953406	11.9047	0
A2894	F	12		148	39	1772	17.805	1772	8.86	28.3214	28.3142	1492.2	-0.20873	12.2087	0
A2895	F	12		155	47	1773	19.563	1773	8.865	28.3438	28.3366	1649.7	0.146019	11.854	0
A2896	F	12		155	47	1773	19.563	1773	8.865	28.3438	28.3366	1649.7	0.146019	11.854	0
A2897	F	12		155	47	1773	19.563	1773	8.865	28.3438	28.3366	1649.7	0.146019	11.854	0
A2898	F	12		155	47	1773	19.563	1773	8.865	28.3438	28.3366	1649.7	0.146019	11.854	0
A2899	F	12		148	35	1779	15.9788	1779	8.895	28.4779	28.4706	1492.2	-0.20873	12.2087	0
A2900	F	12		148	35	1779	15.9788	1779	8.895	28.4779	28.4706	1492.2	-0.20873	12.2087	0
A2901	F	12		148	35	1779	15.9788	1779	8.895	28.4779	28.4706	1492.2	-0.20873	12.2087	0
A2902	F	12		148	33	1780	14.8375	1780	8.9	28.5002	28.493	1492.2	-0.20873	12.2087	0
A2903	F	12		153	46	1780	19.4797	1780	8.9	28.5002	28.493	1604.7	0.0446622	11.9553	0
A2904	F	12		150	41	1780	18.2222	1780	8.9	28.5002	28.493	1537.2	-0.107373	12.1074	0
A2905	F	12		150	41	1780	18.2222	1780	8.9	28.5002	28.493	1537.2	-0.107373	12.1074	0
A2906	F	12		150	41	1780	18.2222	1780	8.9	28.5002	28.493	1537.2	-0.107373	12.1074	0
A2907	F	12		150	41	1780	18.2222	1780	8.9	28.5002	28.493	1537.2	-0.107373	12.1074	0
A2908	F	12		162	69	1780	26.2917	1780	8.9	28.5002	28.493	1807.2	0.500768	11.4992	-1
A2909	F	12		148	33	1780	14.8375	1780	8.9	28.5002	28.493	1492.2	-0.20873	12.2087	0
A2910	F	12		153	46	1780	19.4797	1780	8.9	28.5002	28.493	1604.7	0.0446622	11.9553	0
A2911	F	12		150	41	1780	18.2222	1780	8.9	28.5002	28.493	1537.2	-0.107373	12.1074	0
A2912	F	12		150	41	1780	18.2222	1780	8.9	28.5002	28.493	1537.2	-0.107373	12.1074	0
A2913	F	12		150	41	1780	18.2222	1780	8.9	28.5002	28.493	1537.2	-0.107373	12.1074	0
A2914	F	12		150	41	1780	18.2222	1780	8.9	28.5002	28.493	1537.2	-0.107373	12.1074	0
A2915	F	12		150	41	1780	18.2222	1780	8.9	28.5002	28.493	1537.2	-0.107373	12.1074	0
A2916	F	12		150	41	1780	18.2222	1780	8.9	28.5002	28.493	1537.2	-0.107373	12.1074	0
A2917	F	12		150	41	1780	18.2222	1780	8.9	28.5002	28.493	1537.2	-0.107373	12.1074	0
A2918	F	12		150	41	1780	18.2222	1780	8.9	28.5002	28.493	1537.2	-0.107373	12.1074	0
A2919	F	12		150	40	1780	17.7778	1780	8.9	28.5002	28.493	1537.2	-0.107373	12.1074	0
A2920	F	12		158	43	1780.22	17.2248	1780.22	8.9011	28.5051	28.4979	1717.2	0.298054	11.7019	0
A2921	F	12		152	47.6	1782	20.6025	1782	8.91	28.5449	28.5377	1582.2	-0.0060162	12.006	0
A2922	F	12		155	52.5	1783	21.8522	1783	8.915	28.5673	28.5601	1649.7	0.146019	11.854	0
A2923	F	12		160	61	1784	23.9453	1784	8.92	28.5896	28.5824	1762.2	0.399411	11.6006	0
A2924	F	12		160	61	1784	23.9453	1784	8.92	28.5896	28.5824	1762.2	0.399411	11.6006	0
A2925	F	12		156	49	1785	19.9293	1785	8.925	28.612	28.6048	1672.2	0.196697	11.8033	0
A2926	F	12		156	49	1785	19.9293	1785	8.925	28.612	28.6048	1672.2	0.196697	11.8033	0
A2927	F	12		162	66	1785.12	25.1486	1785.12	8.92562	28.6148	28.6075	1807.2	0.500768	11.4992	-1
A2928	F	12		147	42.5	1787	19.6677	1787	8.935	28.6567	28.6495	1469.7	-0.259408	12.2594	0
A2929	F	12		147	42.5	1787	19.6677	1787	8.935	28.6567	28.6495	1469.7	-0.259408	12.2594	0
A2930	F	12		147	42.5	1787	19.6677	1787	8.935	28.6567	28.6495	1469.7	-0.259408	12.2594	0
A2931	F	12		155	53	1788	22.0604	1788	8.94	28.679	28.6718	1649.7	0.146019	11.854	0
A2932	F	12		162	55	1788	20.9572	1788	8.94	28.679	28.6718	1807.2	0.500768	11.4992	-1
A2933	F	12		162	55	1788	20.9572	1788	8.94	28.679	28.6718	1807.2	0.500768	11.4992	-1
A2934	F	12		155	53	1788	22.0604	1788	8.94	28.679	28.6718	1649.7	0.146019	11.854	0
A2935	F	12		162	55	1788	20.9572	1788	8.94	28.679	28.6718	1807.2	0.500768	11.4992	-1
A2936	F	12		162	55	1788	20.9572	1788	8.94	28.679	28.6718	1807.2	0.500768	11.4992	-1
A2937	F	12		141	32.7	1789	16.4479	1789	8.945	28.7014	28.6942	1334.7	-0.563479	12.5635	1
A2938	F	12		162	53	1789	20.1951	1789	8.945	28.7014	28.6942	1807.2	0.500768	11.4992	-1
A2939	F	12		141	32.7	1789	16.4479	1789	8.945	28.7014	28.6942	1334.7	-0.563479	12.5635	1
A2940	F	12		162	53	1789	20.1951	1789	8.945	28.7014	28.6942	1807.2	0.500768	11.4992	-1
A2941	F	12		162	53	1789	20.1951	1789	8.945	28.7014	28.6942	1807.2	0.500768	11.4992	-1
A2942	F	12		141	32.7	1789	16.4479	1789	8.945	28.7014	28.6942	1334.7	-0.563479	12.5635	1
A2943	F	12		153	41	1790	17.5146	1790	8.95	28.7237	28.7165	1604.7	0.0446622	11.9553	0
A2944	F	12		153	41	1790	17.5146	1790	8.95	28.7237	28.7165	1604.7	0.0446622	11.9553	0
A2945	F	12		153	41	1790	17.5146	1790	8.95	28.7237	28.7165	1604.7	0.0446622	11.9553	0
A2946	F	12		157	45.9	1790	18.6214	1790	8.95	28.7237	28.7165	1694.7	0.247376	11.7526	0
A2947	F	12		150	36	1790.06	16	1790.06	8.95028	28.725	28.7177	1537.2	-0.107373	12.1074	0
A2948	F	12		153	52	1790.06	22.2137	1790.06	8.95028	28.725	28.7177	1604.7	0.0446622	11.9553	0
A2949	F	12		161	44	1791	16.9747	1791	8.955	28.7461	28.7388	1784.7	0.450089	11.5499	0
A2950	F	12		161	44	1791	16.9747	1791	8.955	28.7461	28.7388	1784.7	0.450089	11.5499	0
A2951	F	12		161	44	1791	16.9747	1791	8.955	28.7461	28.7388	1784.7	0.450089	11.5499	0
A2952	F	12		152	39.2	1792	16.9668	1792	8.96	28.7684	28.7612	1582.2	-0.0060162	12.006	0
A2953	F	12		152	39.2	1792	16.9668	1792	8.96	28.7684	28.7612	1582.2	-0.0060162	12.006	0
A2954	F	12		152	39.2	1792	16.9668	1792	8.96	28.7684	28.7612	1582.2	-0.0060162	12.006	0
A2955	F	12		162	45.7	1796	17.4135	1796	8.98	28.8578	28.8506	1807.2	0.500768	11.4992	-1
A2956	F	12		162	45.7	1796	17.4135	1796	8.98	28.8578	28.8506	1807.2	0.500768	11.4992	-1
A2957	F	12		162	45.7	1796	17.4135	1796	8.98	28.8578	28.8506	1807.2	0.500768	11.4992	-1
A2958	F	12		156	57.1	1797	23.4632	1797	8.985	28.8802	28.873	1672.2	0.196697	11.8033	0
A2959	F	12		156	57.1	1797	23.4632	1797	8.985	28.8802	28.873	1672.2	0.196697	11.8033	0
A2960	F	12		156	57.1	1797	23.4632	1797	8.985	28.8802	28.873	1672.2	0.196697	11.8033	0
A2961	F	12		168	63	1798	22.3214	1798	8.99	28.9025	28.8953	1942.2	0.804838	11.1952	-1
A2962	F	12		168	63	1798	22.3214	1798	8.99	28.9025	28.8953	1942.2	0.804838	11.1952	-1
A2963	F	12		168	63	1798	22.3214	1798	8.99	28.9025	28.8953	1942.2	0.804838	11.1952	-1
A2964	F	12		142	32	1800	15.6219	1800	9	28.9473	28.94	1357.2	-0.5128	12.5128	1
A2965	F	12		150	35	1800	15.4667	1800	9	28.9473	28.94	1537.2	-0.107373	12.1074	0
A2966	F	12		162	48	1800	18.4042	1800	9	28.9473	28.94	1807.2	0.500768	11.4992	-1
A2967	F	12		164	50	1800	18.5901	1800	9	28.9473	28.94	1852.2	0.602125	11.3979	-1
A2968	F	12		158	50	1800	20.0288	1800	9	28.9473	28.94	1717.2	0.298054	11.7019	0
A2969	F	12		164	57.6	1800	21.4158	1800	9	28.9473	28.94	1852.2	0.602125	11.3979	-1
A2970	F	12		160	39	1800	15.2344	1800	9	28.9473	28.94	1762.2	0.399411	11.6006	0
A2971	F	12		142	32	1800	15.6219	1800	9	28.9473	28.94	1357.2	-0.5128	12.5128	1
A2972	F	12		150	35	1800	15.4667	1800	9	28.9473	28.94	1537.2	-0.107373	12.1074	0
A2973	F	12		162	48	1800	18.4042	1800	9	28.9473	28.94	1807.2	0.500768	11.4992	-1
A2974	F	12		164	50	1800	18.5901	1800	9	28.9473	28.94	1852.2	0.602125	11.3979	-1
A2975	F	12		158	50	1800	20.0288	1800	9	28.9473	28.94	1717.2	0.298054	11.7019	0
A2976	F	12		164	57.6	1800	21.4158	1800	9	28.9473	28.94	1852.2	0.602125	11.3979	-1
A2977	F	12		162	48	1800	18.2899	1800	9	28.9473	28.94	1807.2	0.500768	11.4992	-1
A2978	F	12		160	39	1800	15.2344	1800	9	28.9473	28.94	1762.2	0.399411	11.6006	0
A2979	F	12		158	50	1800	20.0288	1800	9	28.9473	28.94	1717.2	0.298054	11.7019	0
A2980	F	12		164	57.6	1800	21.4158	1800	9	28.9473	28.94	1852.2	0.602125	11.3979	-1
A2981	F	12		155	37	1803	15.4006	1803	9.015	29.0143	29.007	1649.7	0.146019	11.854	0
A2982	F	12		155	37	1803	15.4006	1803	9.015	29.0143	29.007	1649.7	0.146019	11.854	0
A2983	F	12		159	52.5	1809	20.7666	1809	9.045	29.1484	29.1412	1739.7	0.348733	11.6513	0
A2984	F	12		159	52.5	1809	20.7666	1809	9.045	29.1484	29.1412	1739.7	0.348733	11.6513	0
A2985	F	12		159	52.5	1809	20.7666	1809	9.045	29.1484	29.1412	1739.7	0.348733	11.6513	0
A2986	F	12		149	45.5	1810	20.4946	1810	9.05	29.1708	29.1635	1514.7	-0.158051	12.1581	0
A2987	F	12		149	45.5	1810	20.4946	1810	9.05	29.1708	29.1635	1514.7	-0.158051	12.1581	0
A2988	F	12		149	45.5	1810	20.4946	1810	9.05	29.1708	29.1635	1514.7	-0.158051	12.1581	0
A2989	F	12		155	42	1810.06	17.4818	1810.06	9.05028	29.172	29.1647	1649.7	0.146019	11.854	0
A2990	F	12		155	55	1811	22.8928	1811	9.055	29.1931	29.1859	1649.7	0.146019	11.854	0
A2991	F	12		162	50.8	1813	19.3568	1813	9.065	29.2378	29.2306	1807.2	0.500768	11.4992	-1
A2992	F	12		162	50.8	1813	19.3568	1813	9.065	29.2378	29.2306	1807.2	0.500768	11.4992	-1
A2993	F	12		162	50.8	1813	19.3568	1813	9.065	29.2378	29.2306	1807.2	0.500768	11.4992	-1
A2994	F	12		151	39	1814	16.9729	1814	9.07	29.2602	29.2529	1559.7	-0.0566946	12.0567	0
A2995	F	12		151	39	1814	16.9729	1814	9.07	29.2602	29.2529	1559.7	-0.0566946	12.0567	0
A2996	F	12		142	30	1815	14.878	1815	9.075	29.2825	29.2752	1357.2	-0.5128	12.5128	1
A2997	F	12		157	48	1820	19.4734	1820	9.1	29.3943	29.387	1694.7	0.247376	11.7526	0
A2998	F	12		157	48	1820	19.4734	1820	9.1	29.3943	29.387	1694.7	0.247376	11.7526	0
A2999	F	12		157	48	1820	19.4734	1820	9.1	29.3943	29.387	1694.7	0.247376	11.7526	0
A3000	F	12		157	48	1820	19.4734	1820	9.1	29.3943	29.387	1694.7	0.247376	11.7526	0
A3001	F	12		157	48	1820	19.4734	1820	9.1	29.3943	29.387	1694.7	0.247376	11.7526	0
A3002	F	12		157	48	1820	19.4734	1820	9.1	29.3943	29.387	1694.7	0.247376	11.7526	0
A3003	F	12		157	48	1820	19.4734	1820	9.1	29.3943	29.387	1694.7	0.247376	11.7526	0
A3004	F	12		157	48	1820	19.4734	1820	9.1	29.3943	29.387	1694.7	0.247376	11.7526	0
A3005	F	12		157	48	1820	19.4734	1820	9.1	29.3943	29.387	1694.7	0.247376	11.7526	0
A3006	F	12		157	48	1820	19.4734	1820	9.1	29.3943	29.387	1694.7	0.247376	11.7526	0
A3007	F	12		157	48	1820	19.4734	1820	9.1	29.3943	29.387	1694.7	0.247376	11.7526	0
A3008	F	12		157	48	1820	19.4734	1820	9.1	29.3943	29.387	1694.7	0.247376	11.7526	0
A3009	F	12		152	45.9	1822	19.8667	1822	9.11	29.439	29.4317	1582.2	-0.0060162	12.006	0
A3010	F	12		152	45.9	1822	19.8667	1822	9.11	29.439	29.4317	1582.2	-0.0060162	12.006	0
A3011	F	12		152	45.9	1822	19.8667	1822	9.11	29.439	29.4317	1582.2	-0.0060162	12.006	0
A3012	F	12		161	43	1825	16.5889	1825	9.125	29.506	29.4988	1784.7	0.450089	11.5499	0
A3013	F	12		151	45	1825.35	19.736	1825.35	9.12676	29.5139	29.5066	1559.7	-0.0566946	12.0567	0
A3014	F	12		158	57	1825.35	22.8329	1825.35	9.12676	29.5139	29.5066	1717.2	0.298054	11.7019	0
A3015	F	12		155	48	1827	19.9792	1827	9.135	29.5507	29.5434	1649.7	0.146019	11.854	0
A3016	F	12		156	52	1827	21.2442	1827	9.135	29.5507	29.5434	1672.2	0.196697	11.8033	0
A3017	F	12		159	50	1827	19.7777	1827	9.135	29.5507	29.5434	1739.7	0.348733	11.6513	0
A3018	F	12		155	48	1827	19.9792	1827	9.135	29.5507	29.5434	1649.7	0.146019	11.854	0
A3019	F	12		156	52	1827	21.2442	1827	9.135	29.5507	29.5434	1672.2	0.196697	11.8033	0
A3020	F	12		159	50	1827	19.7777	1827	9.135	29.5507	29.5434	1739.7	0.348733	11.6513	0
A3021	F	12		159	50	1827	19.7777	1827	9.135	29.5507	29.5434	1739.7	0.348733	11.6513	0
A3022	F	12		159	46.8	1832	18.5119	1832	9.16	29.6625	29.6552	1739.7	0.348733	11.6513	0
A3023	F	12		159	46.8	1832	18.5119	1832	9.16	29.6625	29.6552	1739.7	0.348733	11.6513	0
A3024	F	12		159	46.8	1832	18.5119	1832	9.16	29.6625	29.6552	1739.7	0.348733	11.6513	0
A3025	F	12		180	49	1835.69	15.1235	1835.69	9.17847	29.7451	29.7378	2212.2	1.41298	10.587	-1
A3026	F	12		153	51	1835.69	21.7865	1835.69	9.17847	29.7451	29.7378	1604.7	0.0446622	11.9553	0
A3027	F	12		150	46.3	1836	20.5778	1836	9.18	29.7519	29.7446	1537.2	-0.107373	12.1074	0
A3028	F	12		151	40.2	1836	17.6308	1836	9.18	29.7519	29.7446	1559.7	-0.0566946	12.0567	0
A3029	F	12		150	46.3	1836	20.5778	1836	9.18	29.7519	29.7446	1537.2	-0.107373	12.1074	0
A3030	F	12		151	40.2	1836	17.6308	1836	9.18	29.7519	29.7446	1559.7	-0.0566946	12.0567	0
A3031	F	12		151	40.2	1836	17.6308	1836	9.18	29.7519	29.7446	1559.7	-0.0566946	12.0567	0
A3032	F	12		158	48.5	1836	19.428	1836	9.18	29.7519	29.7446	1717.2	0.298054	11.7019	0
A3033	F	12		150	46.3	1836	20.5778	1836	9.18	29.7519	29.7446	1537.2	-0.107373	12.1074	0
A3034	F	12		148	53	1840	24.0595	1840	9.2	29.8413	29.834	1492.2	-0.20873	12.2087	0
A3035	F	12		159	37	1840	14.6355	1840	9.2	29.8413	29.834	1739.7	0.348733	11.6513	0
A3036	F	12		148	53	1840	24.0595	1840	9.2	29.8413	29.834	1492.2	-0.20873	12.2087	0
A3037	F	12		159	37	1840	14.6355	1840	9.2	29.8413	29.834	1739.7	0.348733	11.6513	0
A3038	F	12		160	47	1840	18.3594	1840	9.2	29.8413	29.834	1762.2	0.399411	11.6006	0
A3039	F	12		151	45	1840.91	19.736	1840.91	9.20455	29.8616	29.8543	1559.7	-0.0566946	12.0567	0
A3040	F	12		162	51	1843	19.433	1843	9.215	29.9084	29.9011	1807.2	0.500768	11.4992	-1
A3041	F	12		162	51	1843	19.433	1843	9.215	29.9084	29.9011	1807.2	0.500768	11.4992	-1
A3042	F	12		162	51	1843	19.433	1843	9.215	29.9084	29.9011	1807.2	0.500768	11.4992	-1
A3043	F	12		159	48	1848	18.9866	1848	9.24	30.0201	30.0128	1739.7	0.348733	11.6513	0
A3044	F	12		149	44	1848	19.8189	1848	9.24	30.0201	30.0128	1514.7	-0.158051	12.1581	0
A3045	F	12		159	48	1848	18.9866	1848	9.24	30.0201	30.0128	1739.7	0.348733	11.6513	0
A3046	F	12		149	44	1848	19.8189	1848	9.24	30.0201	30.0128	1514.7	-0.158051	12.1581	0
A3047	F	12		149	44	1848	19.8189	1848	9.24	30.0201	30.0128	1514.7	-0.158051	12.1581	0
A3048	F	12		156	48	1850	19.7239	1850	9.25	30.0648	30.0575	1672.2	0.196697	11.8033	0
A3049	F	12		155	44	1850	18.3143	1850	9.25	30.0648	30.0575	1649.7	0.146019	11.854	0
A3050	F	12		155	49	1850	20.3954	1850	9.25	30.0648	30.0575	1649.7	0.146019	11.854	0
A3051	F	12		155	49	1850	20.3954	1850	9.25	30.0648	30.0575	1649.7	0.146019	11.854	0
A3052	F	12		155	49	1850	20.3954	1850	9.25	30.0648	30.0575	1649.7	0.146019	11.854	0
A3053	F	12		155	49	1850	20.3954	1850	9.25	30.0648	30.0575	1649.7	0.146019	11.854	0
A3054	F	12		164	49	1850	18.2183	1850	9.25	30.0648	30.0575	1852.2	0.602125	11.3979	-1
A3055	F	12		143	30	1850	14.6706	1850	9.25	30.0648	30.0575	1379.7	-0.462122	12.4621	0
A3056	F	12		156	48	1850	19.7239	1850	9.25	30.0648	30.0575	1672.2	0.196697	11.8033	0
A3057	F	12		155	44	1850	18.3143	1850	9.25	30.0648	30.0575	1649.7	0.146019	11.854	0
A3058	F	12		155	49	1850	20.3954	1850	9.25	30.0648	30.0575	1649.7	0.146019	11.854	0
A3059	F	12		155	49	1850	20.3954	1850	9.25	30.0648	30.0575	1649.7	0.146019	11.854	0
A3060	F	12		155	49	1850	20.3954	1850	9.25	30.0648	30.0575	1649.7	0.146019	11.854	0
A3061	F	12		155	49	1850	20.3954	1850	9.25	30.0648	30.0575	1649.7	0.146019	11.854	0
A3062	F	12		164	49	1850	18.2183	1850	9.25	30.0648	30.0575	1852.2	0.602125	11.3979	-1
A3063	F	12		164	49	1850	18.2183	1850	9.25	30.0648	30.0575	1852.2	0.602125	11.3979	-1
A3064	F	12		155	49	1850	20.3954	1850	9.25	30.0648	30.0575	1649.7	0.146019	11.854	0
A3065	F	12		155	49	1850	20.3954	1850	9.25	30.0648	30.0575	1649.7	0.146019	11.854	0
A3066	F	12		155	49	1850	20.3954	1850	9.25	30.0648	30.0575	1649.7	0.146019	11.854	0
A3067	F	12		155	44	1850	18.3143	1850	9.25	30.0648	30.0575	1649.7	0.146019	11.854	0
A3068	F	12		155	49	1850	20.3954	1850	9.25	30.0648	30.0575	1649.7	0.146019	11.854	0
A3069	F	12		143	30	1850	14.6706	1850	9.25	30.0648	30.0575	1379.7	-0.462122	12.4621	0
A3070	F	12		158	55	1851	22.0317	1851	9.255	30.0872	30.0799	1717.2	0.298054	11.7019	0
A3071	F	12		147	45	1851.43	20.8247	1851.43	9.25714	30.0967	30.0894	1469.7	-0.259408	12.2594	0
A3072	F	12		162	55	1851.43	20.9572	1851.43	9.25714	30.0967	30.0894	1807.2	0.500768	11.4992	-1
A3073	F	12		162	65	1851.43	24.7676	1851.43	9.25714	30.0967	30.0894	1807.2	0.500768	11.4992	-1
A3074	F	12		162	42	1853	16.0037	1853	9.265	30.1319	30.1246	1807.2	0.500768	11.4992	-1
A3075	F	12		162	42	1853	16.0037	1853	9.265	30.1319	30.1246	1807.2	0.500768	11.4992	-1
A3076	F	12		162	42	1853	16.0037	1853	9.265	30.1319	30.1246	1807.2	0.500768	11.4992	-1
A3077	F	12		156	60	1853	24.6548	1853	9.265	30.1319	30.1246	1672.2	0.196697	11.8033	0
A3078	F	12		165	56	1858	20.5693	1858	9.29	30.2436	30.2363	1874.7	0.652803	11.3472	-1
A3079	F	12		165	56	1858	20.5693	1858	9.29	30.2436	30.2363	1874.7	0.652803	11.3472	-1
A3080	F	12		165	56	1858	20.5693	1858	9.29	30.2436	30.2363	1874.7	0.652803	11.3472	-1
A3081	F	12		153	51.6	1859	22.0428	1859	9.295	30.266	30.2587	1604.7	0.0446622	11.9553	0
A3082	F	12		153	51.6	1859	22.0428	1859	9.295	30.266	30.2587	1604.7	0.0446622	11.9553	0
A3083	F	12		153	51.6	1859	22.0428	1859	9.295	30.266	30.2587	1604.7	0.0446622	11.9553	0
A3084	F	12		146	41	1860	19.2344	1860	9.3	30.2883	30.281	1447.2	-0.310087	12.3101	0
A3085	F	12		153	44.8	1860	19.1379	1860	9.3	30.2883	30.281	1604.7	0.0446622	11.9553	0
A3086	F	12		156	47	1860	19.313	1860	9.3	30.2883	30.281	1672.2	0.196697	11.8033	0
A3087	F	12		167	57	1860	20.4382	1860	9.3	30.2883	30.281	1919.7	0.75416	11.2458	-1
A3088	F	12		141	30	1860	15.0898	1860	9.3	30.2883	30.281	1334.7	-0.563479	12.5635	1
A3089	F	12		146	41	1860	19.2344	1860	9.3	30.2883	30.281	1447.2	-0.310087	12.3101	0
A3090	F	12		153	44.8	1860	19.1379	1860	9.3	30.2883	30.281	1604.7	0.0446622	11.9553	0
A3091	F	12		156	47	1860	19.313	1860	9.3	30.2883	30.281	1672.2	0.196697	11.8033	0
A3092	F	12		167	57	1860	20.4382	1860	9.3	30.2883	30.281	1919.7	0.75416	11.2458	-1
A3093	F	12		161	49	1860	18.9036	1860	9.3	30.2883	30.281	1784.7	0.450089	11.5499	0
A3094	F	12		167	57	1860	20.4382	1860	9.3	30.2883	30.281	1919.7	0.75416	11.2458	-1
A3095	F	12		153	44.8	1860	19.1379	1860	9.3	30.2883	30.281	1604.7	0.0446622	11.9553	0
A3096	F	12		156	47	1860	19.313	1860	9.3	30.2883	30.281	1672.2	0.196697	11.8033	0
A3097	F	12		140	45	1862.07	22.9592	1862.07	9.31034	30.3346	30.3272	1312.2	-0.614157	12.6142	1
A3098	F	12		153	41	1863	17.5146	1863	9.315	30.3554	30.3481	1604.7	0.0446622	11.9553	0
A3099	F	12		158	42	1863	16.8242	1863	9.315	30.3554	30.3481	1717.2	0.298054	11.7019	0
A3100	F	12		153	41	1863	17.5146	1863	9.315	30.3554	30.3481	1604.7	0.0446622	11.9553	0
A3101	F	12		158	42	1863	16.8242	1863	9.315	30.3554	30.3481	1717.2	0.298054	11.7019	0
A3102	F	12		152	80	1863	34.626	1863	9.315	30.3554	30.3481	1582.2	-0.0060162	12.006	0
A3103	F	12		153	41	1863	17.5146	1863	9.315	30.3554	30.3481	1604.7	0.0446622	11.9553	0
A3104	F	12		158	42	1863	16.8242	1863	9.315	30.3554	30.3481	1717.2	0.298054	11.7019	0
A3105	F	12		143	30	1867.44	14.6706	1867.44	9.33718	30.4545	30.4472	1379.7	-0.462122	12.4621	0
A3106	F	12		155	56	1870	23.3923	1870	9.35	30.5118	30.5045	1649.7	0.146019	11.854	0
A3107	F	12		145	32.5	1870	15.4578	1870	9.35	30.5118	30.5045	1424.7	-0.360765	12.3608	0
A3108	F	12		158	37	1870	14.8213	1870	9.35	30.5118	30.5045	1717.2	0.298054	11.7019	0
A3109	F	12		155	56	1870	23.3923	1870	9.35	30.5118	30.5045	1649.7	0.146019	11.854	0
A3110	F	12		158	37	1870	14.8213	1870	9.35	30.5118	30.5045	1717.2	0.298054	11.7019	0
A3111	F	12		145	32.5	1870	15.4578	1870	9.35	30.5118	30.5045	1424.7	-0.360765	12.3608	0
A3112	F	12		163	44	1870	16.5607	1870	9.35	30.5118	30.5045	1829.7	0.551446	11.4486	-1
A3113	F	12		152	39	1872	16.8802	1872	9.36	30.5565	30.5492	1582.2	-0.0060162	12.006	0
A3114	F	12		152	39	1872	16.8802	1872	9.36	30.5565	30.5492	1582.2	-0.0060162	12.006	0
A3115	F	12		152	39	1872	16.8802	1872	9.36	30.5565	30.5492	1582.2	-0.0060162	12.006	0
A3116	F	12		152	39	1872	16.8802	1872	9.36	30.5565	30.5492	1582.2	-0.0060162	12.006	0
A3117	F	12		162	58	1875	22.1003	1875	9.375	30.6236	30.6163	1807.2	0.500768	11.4992	-1
A3118	F	12		162	58	1875	22.1003	1875	9.375	30.6236	30.6163	1807.2	0.500768	11.4992	-1
A3119	F	12		162	58	1875	22.1003	1875	9.375	30.6236	30.6163	1807.2	0.500768	11.4992	-1
A3120	F	12		159	51	1878	20.1733	1878	9.39	30.6907	30.6833	1739.7	0.348733	11.6513	0
A3121	F	12		159	51	1878	20.1733	1878	9.39	30.6907	30.6833	1739.7	0.348733	11.6513	0
A3122	F	12		159	51	1878	20.1733	1878	9.39	30.6907	30.6833	1739.7	0.348733	11.6513	0
A3123	F	12		165	39	1878.26	14.3251	1878.26	9.3913	30.6965	30.6891	1874.7	0.652803	11.3472	-1
A3124	F	12		164	50	1878.26	18.5901	1878.26	9.3913	30.6965	30.6891	1852.2	0.602125	11.3979	-1
A3125	F	12		158	52	1880	20.83	1880	9.4	30.7354	30.728	1717.2	0.298054	11.7019	0
A3126	F	12		165	56	1880	20.5693	1880	9.4	30.7354	30.728	1874.7	0.652803	11.3472	-1
A3127	F	12		158	52	1880	20.83	1880	9.4	30.7354	30.728	1717.2	0.298054	11.7019	0
A3128	F	12		165	56	1880	20.5693	1880	9.4	30.7354	30.728	1874.7	0.652803	11.3472	-1
A3129	F	12		165	56	1880	20.5693	1880	9.4	30.7354	30.728	1874.7	0.652803	11.3472	-1
A3130	F	12		150	44	1883.72	19.5556	1883.72	9.4186	30.8185	30.8112	1537.2	-0.107373	12.1074	0
A3131	F	12		154	48	1890	20.2395	1890	9.45	30.9589	30.9515	1627.2	0.0953406	11.9047	0
A3132	F	12		152	41.2	1890	17.8324	1890	9.45	30.9589	30.9515	1582.2	-0.0060162	12.006	0
A3133	F	12		152	36.45	1890	15.7765	1890	9.45	30.9589	30.9515	1582.2	-0.0060162	12.006	0
A3134	F	12		154	37.95	1890	16.0019	1890	9.45	30.9589	30.9515	1627.2	0.0953406	11.9047	0
A3135	F	12		154	37.95	1890	16.0019	1890	9.45	30.9589	30.9515	1627.2	0.0953406	11.9047	0
A3136	F	12		156	58	1890	23.833	1890	9.45	30.9589	30.9515	1672.2	0.196697	11.8033	0
A3137	F	12		148.5	36	1890	16.3249	1890	9.45	30.9589	30.9515	1503.45	-0.183391	12.1834	0
A3138	F	12		150	39	1890	17.3333	1890	9.45	30.9589	30.9515	1537.2	-0.107373	12.1074	0
A3139	F	12		156	42	1890	17.2584	1890	9.45	30.9589	30.9515	1672.2	0.196697	11.8033	0
A3140	F	12		154	48	1890	20.2395	1890	9.45	30.9589	30.9515	1627.2	0.0953406	11.9047	0
A3141	F	12		152	41.2	1890	17.8324	1890	9.45	30.9589	30.9515	1582.2	-0.0060162	12.006	0
A3142	F	12		152	36.45	1890	15.7765	1890	9.45	30.9589	30.9515	1582.2	-0.0060162	12.006	0
A3143	F	12		154	37.95	1890	16.0019	1890	9.45	30.9589	30.9515	1627.2	0.0953406	11.9047	0
A3144	F	12		154	37.95	1890	16.0019	1890	9.45	30.9589	30.9515	1627.2	0.0953406	11.9047	0
A3145	F	12		156	58	1890	23.833	1890	9.45	30.9589	30.9515	1672.2	0.196697	11.8033	0
A3146	F	12		148.5	36	1890	16.3249	1890	9.45	30.9589	30.9515	1503.45	-0.183391	12.1834	0
A3147	F	12		150	39	1890	17.3333	1890	9.45	30.9589	30.9515	1537.2	-0.107373	12.1074	0
A3148	F	12		156	42	1890	17.2584	1890	9.45	30.9589	30.9515	1672.2	0.196697	11.8033	0
A3149	F	12		140	32	1890	16.3265	1890	9.45	30.9589	30.9515	1312.2	-0.614157	12.6142	1
A3150	F	12		152	36.45	1890	15.7765	1890	9.45	30.9589	30.9515	1582.2	-0.0060162	12.006	0
A3151	F	12		154	37.95	1890	16.0019	1890	9.45	30.9589	30.9515	1627.2	0.0953406	11.9047	0
A3152	F	12		154	37.95	1890	16.0019	1890	9.45	30.9589	30.9515	1627.2	0.0953406	11.9047	0
A3153	F	12		156	42	1890	17.2584	1890	9.45	30.9589	30.9515	1672.2	0.196697	11.8033	0
A3154	F	12		148.5	36	1890	16.3249	1890	9.45	30.9589	30.9515	1503.45	-0.183391	12.1834	0
A3155	F	12		152	41.2	1890	17.8324	1890	9.45	30.9589	30.9515	1582.2	-0.0060162	12.006	0
A3156	F	12		156	58	1890	23.833	1890	9.45	30.9589	30.9515	1672.2	0.196697	11.8033	0
A3157	F	12		154	52	1890	21.9261	1890	9.45	30.9589	30.9515	1627.2	0.0953406	11.9047	0
A3158	F	12		147	30	1891	13.8831	1891	9.455	30.9812	30.9739	1469.7	-0.259408	12.2594	0
A3159	F	12		147	30	1891	13.8831	1891	9.455	30.9812	30.9739	1469.7	-0.259408	12.2594	0
A3160	F	12		151	49	1900	21.4464	1900	9.5	31.1824	31.175	1559.7	-0.0566946	12.0567	0
A3161	F	12		156	54.4	1900	22.3537	1900	9.5	31.1824	31.175	1672.2	0.196697	11.8033	0
A3162	F	12		150	45	1900	20	1900	9.5	31.1824	31.175	1537.2	-0.107373	12.1074	0
A3163	F	12		154	32.2	1900	13.5773	1900	9.5	31.1824	31.175	1627.2	0.0953406	11.9047	0
A3164	F	12		151	49	1900	21.4464	1900	9.5	31.1824	31.175	1559.7	-0.0566946	12.0567	0
A3165	F	12		156	54.4	1900	22.3537	1900	9.5	31.1824	31.175	1672.2	0.196697	11.8033	0
A3166	F	12		150	45	1900	20	1900	9.5	31.1824	31.175	1537.2	-0.107373	12.1074	0
A3167	F	12		156	54.4	1900	22.3537	1900	9.5	31.1824	31.175	1672.2	0.196697	11.8033	0
A3168	F	12		154	32.2	1900	13.5773	1900	9.5	31.1824	31.175	1627.2	0.0953406	11.9047	0
A3169	F	12		150	45	1900	20	1900	9.5	31.1824	31.175	1537.2	-0.107373	12.1074	0
A3170	F	12		153	37.5	1900.29	16.0195	1900.29	9.50147	31.1889	31.1816	1604.7	0.0446622	11.9553	0
A3171	F	12		157	54	1905.88	21.9076	1905.88	9.52941	31.3139	31.3065	1694.7	0.247376	11.7526	0
A3172	F	12		167	47	1907	16.8525	1907	9.535	31.3388	31.3315	1919.7	0.75416	11.2458	-1
A3173	F	12		167	47	1907	16.8525	1907	9.535	31.3388	31.3315	1919.7	0.75416	11.2458	-1
A3174	F	12		167	47	1907	16.8525	1907	9.535	31.3388	31.3315	1919.7	0.75416	11.2458	-1
A3175	F	12		166	50.9	1910	18.4715	1910	9.55	31.4059	31.3985	1897.2	0.703481	11.2965	-1
A3176	F	12		139	33	1910	17.0799	1910	9.55	31.4059	31.3985	1289.7	-0.664835	12.6648	1
A3177	F	12		166	50.9	1910	18.4715	1910	9.55	31.4059	31.3985	1897.2	0.703481	11.2965	-1
A3178	F	12		139	33	1910	17.0799	1910	9.55	31.4059	31.3985	1289.7	-0.664835	12.6648	1
A3179	F	12		166	50.9	1910	18.4715	1910	9.55	31.4059	31.3985	1897.2	0.703481	11.2965	-1
A3180	F	12		150	42	1912	18.6667	1912	9.56	31.4506	31.4432	1537.2	-0.107373	12.1074	0
A3181	F	12		150	42	1912	18.6667	1912	9.56	31.4506	31.4432	1537.2	-0.107373	12.1074	0
A3182	F	12		150	42	1912	18.6667	1912	9.56	31.4506	31.4432	1537.2	-0.107373	12.1074	0
A3183	F	12		155	62	1914	25.8481	1914	9.57	31.4953	31.4879	1649.7	0.146019	11.854	0
A3184	F	12		158	57	1914	22.8329	1914	9.57	31.4953	31.4879	1717.2	0.298054	11.7019	0
A3185	F	12		155	62	1914	25.8481	1914	9.57	31.4953	31.4879	1649.7	0.146019	11.854	0
A3186	F	12		158	57	1914	22.8329	1914	9.57	31.4953	31.4879	1717.2	0.298054	11.7019	0
A3187	F	12		161	62.7	1917	24.1889	1917	9.585	31.5624	31.555	1784.7	0.450089	11.5499	0
[truncated: 7,478 more rows]

## Sheet: m11
ID	Sex	Age (years)	H (cm)	M (kg)	H (cm)	12minRT (m)	bmi
1	M	11	160	45	160	1100	17.5781
2	M	11	146	47	146	1008	22.0492
3	M	11	146	47	146	1008	22.0492
4	M	11	146	47	146	1008	22.0492
5	M	11	150	50	150	1032	22.2222
6	M	11	150	50	150	1032	22.2222
7	M	11	150	55	150	1032	24.4444
8	M	11	150	50	150	1032	22.2222
9	M	11	137	57.7	137	1040	30.7422
10	M	11	151	78	151	1050	34.209
11	M	11	146	43	146	1056	20.1726
12	M	11	144	51	144	1060	24.5949
13	M	11	150	40.5	150	1080	18
14	M	11	150	34	150	1080	15.1111
15	M	11	150	40.5	150	1080	18
16	M	11	150	40.5	150	1080	18
17	M	11	150	34	150	1080	15.1111
18	M	11	143	54.7	143	1091	26.7495
19	M	11	138	37	138	1104	19.4287
20	M	11	140	30	140	1104	15.3061
21	M	11	138	37	138	1104	19.4287
22	M	11	140	30	140	1104	15.3061
23	M	11	138	37	138	1104	19.4287
24	M	11	140	30	140	1104	15.3061
25	M	11	147	31.5	147	1176	14.5773
26	M	11	149	38.5	149	1188	17.3416
27	M	11	149	38.5	149	1188	17.3416
28	M	11	149	38.5	149	1188	17.3416
29	M	11	135	43	135	1189	23.594
30	M	11	148	38	148	1200	17.3484
31	M	11	148	38	148	1200	17.3484
32	M	11	163.5	79.5	163.5	1200	29.7394
33	M	11	155	50	155	1200	20.8117
34	M	11	148	38	148	1200	17.3484
35	M	11	158	51	158	1210	20.4294
36	M	11	136	53	136	1230	28.6548
37	M	11	166.5	73	166.5	1249	26.3326
38	M	11	137	41.8	137	1250	22.2708
39	M	11	151	48	151	1251	21.0956
40	M	11	151	48	151	1251	21.0956
41	M	11	148	44	148	1277	20.0877
42	M	11	137	34.5	137	1296	18.3814
43	M	11	137	34.5	137	1296	18.3814
44	M	11	137	34.5	137	1296	18.3814
45	M	11	151	60	151	1300	26.1831
46	M	11	151	60	151	1300	26.1831
47	M	11	143	49	143	1329	23.9621
48	M	11	167	67	167	1350	24.0238
49	M	11	141	50	141	1400	25.1496
50	M	11	144	37	144	1400	17.8434
51	M	11	149	49	149	1404	21.8459
52	M	11	149	49	149	1404	21.8459
53	M	11	165	59	165	1420	21.6713
54	M	11	160	53	160	1421	20.7031
55	M	11	160	53	160	1421	20.7031
56	M	11	160	53	160	1421	20.7031
57	M	11	158	52.6	158	1440	21.0703
58	M	11	147	43	147	1450	19.8991
59	M	11	150	60	150	1458	26.6667
60	M	11	150	60	150	1458	26.6667
61	M	11	153	54	153	1470	23.0681
62	M	11	153	52	153	1500	22.2137
63	M	11	153	52	153	1500	22.2137
64	M	11	153	52	153	1500	22.2137
65	M	11	146	41.6	146	1500	19.5159
66	M	11	155	59	155	1500	24.5578
67	M	11	146	48.9	146	1512	22.9405
68	M	11	146	48.9	146	1512	22.9405
69	M	11	159	63	159	1512	24.9199
70	M	11	146	48.9	146	1512	22.9405
71	M	11	151	54	151	1522	23.8147
72	M	11	151	54	151	1522	23.8147
73	M	11	162	59	162	1527	22.4813
74	M	11	162	59	162	1527	22.4813
75	M	11	162	59	162	1527	22.4813
76	M	11	148.5	53.8	148.5	1530	24.3966
77	M	11	148.5	53.8	148.5	1530	24.3966
78	M	11	148.5	53.8	148.5	1530	24.3966
79	M	11	156	60	156	1532	24.7781
80	M	11	156	60	156	1532	24.7781
81	M	11	147	55	147	1532	25.4524
82	M	11	135	30.5	135	1534	16.7353
83	M	11	135	30.5	135	1534	16.7353
84	M	11	135	30.5	135	1534	16.7353
85	M	11	155	54	155	1540	22.4766
86	M	11	144	30.15	144	1540	14.5399
87	M	11	155	54	155	1540	22.4766
88	M	11	144	30.15	144	1540	14.5399
89	M	11	155	54	155	1540	22.4766
90	M	11	157	67	157	1540	27.1816
91	M	11	147	52.5	147	1545	24.2954
92	M	11	145	51	145	1545	24.2568
93	M	11	152	58	152	1550	25.1039
94	M	11	163	59	163	1555	22.2063
95	M	11	163	59	163	1555	22.2063
96	M	11	163	59	163	1555	22.2063
97	M	11	139	36	139	1560	18.6326
98	M	11	147	44	147	1561.45	20.3619
99	M	11	141	45	141	1562	22.6347
100	M	11	141	45	141	1562	22.6347
101	M	11	141	45	141	1562	22.6347
102	M	11	136	40	136	1565	21.6263
103	M	11	136	40	136	1565	21.6263
104	M	11	136	40	136	1565	21.6263
105	M	11	148	41.7	148	1566	19.0376
106	M	11	159	63	159	1566	24.9199
107	M	11	148	41.7	148	1566	19.0376
108	M	11	159	63	159	1566	24.9199
109	M	11	159	63	159	1566	24.9199
110	M	11	148	41.7	148	1566	19.0376
111	M	11	145	45	145	1567	21.4031
112	M	11	145	45	145	1567	21.4031
113	M	11	145	45	145	1567	21.4031
114	M	11	156	66	156	1570	27.1203
115	M	11	151	42	151	1580	18.4202
116	M	11	139	44.4	139	1593	22.9802
117	M	11	151	49.5	151	1593	21.7096
118	M	11	139	44.4	139	1593	22.9802
119	M	11	151	49.5	151	1593	21.7096
120	M	11	139	44.4	139	1593	22.9802
121	M	11	151	49.5	151	1593	21.7096
122	M	11	150	47.75	150	1600	21.2222
123	M	11	152.5	59.2	152.5	1600	25.4555
124	M	11	153	52	153	1601	22.2137
125	M	11	153	43	153	1603.96	18.369
126	M	11	153	52.5	153	1615	22.4273
127	M	11	153	52.5	153	1615	22.4273
128	M	11	153	52.5	153	1615	22.4273
129	M	11	158	55	158	1616	22.0317
130	M	11	137	36	137	1620	19.1806
131	M	11	142	44.5	142	1620	22.069
132	M	11	148	41.2	148	1620	18.8093
133	M	11	170	72.8	170	1620	25.1903
134	M	11	137	36	137	1620	19.1806
135	M	11	142	44.5	142	1620	22.069
136	M	11	148	41.2	148	1620	18.8093
137	M	11	151.5	40	151.5	1620	17.4275
138	M	11	137	36	137	1620	19.1806
139	M	11	148	41.2	148	1620	18.8093
140	M	11	142	44.5	142	1620	22.069
141	M	11	170	72.8	170	1620	25.1903
142	M	11	151	61	151	1624	26.5778
143	M	11	148	35	148	1624	15.9788
144	M	11	151	61	151	1624	26.5778
145	M	11	148	35	148	1624	15.9788
146	M	11	156	51.6	156	1627	21.2032
147	M	11	156	51.6	156	1627	21.2032
148	M	11	156	51.6	156	1627	21.2032
149	M	11	165	59	165	1632.24	21.6713
150	M	11	146	40	146	1634	18.7652
151	M	11	146	40	146	1634	18.7652
152	M	11	146	40	146	1634	18.7652
153	M	11	158	63.5	158	1637	25.4366
154	M	11	150	60.7	150	1640	26.9778
155	M	11	156	69	156	1641	28.3531
156	M	11	154	55	154	1646	23.1911
157	M	11	155	50.5	155	1647	21.0198
158	M	11	155	50.5	155	1647	21.0198
159	M	11	155	50.5	155	1647	21.0198
160	M	11	137	38	137	1650	20.2462
161	M	11	137	38	137	1650	20.2462
162	M	11	137	38	137	1650	20.2462
163	M	11	171	66	171	1650	22.571
164	M	11	147	54	147	1650	24.9896
165	M	11	155	60	155	1657.29	24.974
166	M	11	139	45	139	1665	23.1354
167	M	11	150	60	150	1665	26.5333
168	M	11	139	45	139	1665	23.1354
169	M	11	150	60	150	1665	26.5333
170	M	11	143	41	143	1668	20.0499
171	M	11	143	41	143	1668	20.0499
172	M	11	143	41	143	1668	20.0499
173	M	11	144	33	144	1670.1	15.9144
174	M	11	150	50	150	1670.1	22.2222
175	M	11	161	66	161	1674	25.462
176	M	11	161	66	161	1674	25.462
177	M	11	157	54.5	157	1677	22.1104
178	M	11	154	34.5	154	1677	14.5471
179	M	11	157	54.5	157	1677	22.1104
180	M	11	157	54.5	157	1677	22.1104
181	M	11	154	34.5	154	1677	14.5471
182	M	11	140	42.3	140	1680	21.5816
183	M	11	137	35	137	1680	18.6478
184	M	11	150	47	150	1680	20.8889
185	M	11	136	31.5	136	1680	17.0307
186	M	11	141	40	141	1680	20.1197
187	M	11	138	33	138	1680	17.3283
188	M	11	152	33	152	1682	14.2832
189	M	11	146	44	146	1683	20.6418
190	M	11	146	44	146	1683	20.6418
191	M	11	146	44	146	1683	20.6418
192	M	11	148	38	148	1684	17.4397
193	M	11	148	38	148	1684	17.4397
194	M	11	146	33	146	1690	15.4813
195	M	11	146	33	146	1690	15.4813
196	M	11	146	33	146	1690	15.4813
197	M	11	140	32.6	140	1701	16.6327
198	M	11	164	52.5	164	1701	19.5196
199	M	11	140	32.6	140	1701	16.6327
200	M	11	164	52.5	164	1701	19.5196
201	M	11	140	32.6	140	1701	16.6327
202	M	11	164	52.5	164	1701	19.5196
203	M	11	145	42	145	1710	19.9287
204	M	11	142	30	142	1710	14.878
205	M	11	145	42	145	1710	19.9287
206	M	11	142	30	142	1710	14.878
207	M	11	138	40.8	138	1715	21.4241
208	M	11	138	40.8	138	1715	21.4241
209	M	11	138	40.8	138	1715	21.4241
210	M	11	140	34	140	1723.4	17.3469
211	M	11	163	48	163	1728	18.0662
212	M	11	137	41.7	137	1728	22.2175
213	M	11	148	37.5	148	1728	17.1202
214	M	11	142	37.9	142	1728	18.7959
215	M	11	157	40	157	1728	16.2278
216	M	11	152	62	152	1728	26.8352
217	M	11	163	48	163	1728	18.0662
218	M	11	137	41.7	137	1728	22.2175
219	M	11	148	37.5	148	1728	17.1202
220	M	11	142	37.9	142	1728	18.7959
221	M	11	157	40	157	1728	16.2278
222	M	11	152	62	152	1728	26.8352
223	M	11	142	37.9	142	1728	18.7959
224	M	11	157	40	157	1728	16.2278
225	M	11	148	37.5	148	1728	17.1202
226	M	11	137	41.7	137	1728	22.2175
227	M	11	152	57	152	1729	24.5412
228	M	11	152	57	152	1729	24.5412
229	M	11	169	64	169	1737	22.4082
230	M	11	147	38	147	1738	17.5853
231	M	11	147	38	147	1738	17.5853
232	M	11	147	38	147	1738	17.5853
233	M	11	144	32	144	1740	15.5768
234	M	11	144	32	144	1740	15.5768
235	M	11	155	51	155	1740	21.2279
236	M	11	145	32	145	1741.94	15.22
237	M	11	158	53	158	1741.94	21.2306
238	M	11	140	33.2	140	1742	16.9388
239	M	11	140	33.2	140	1742	16.9388
240	M	11	140	33.2	140	1742	16.9388
241	M	11	144	50	144	1746	24.1127
242	M	11	157	50	157	1750	20.2848
243	M	11	157	50	157	1750	20.2848
244	M	11	157	50	157	1750	20.2848
245	M	11	159	53	159	1751.35	20.9644
246	M	11	153	59	153	1751.35	25.204
247	M	11	144	34.5	144	1755	16.6377
248	M	11	160	59	160	1755	23.0469
249	M	11	144	34.5	144	1755	16.6377
250	M	11	160	59	160	1755	23.0469
251	M	11	160	59	160	1755	23.0469
252	M	11	144	34.5	144	1755	16.6377
253	M	11	142	31	142	1768	15.3739
254	M	11	145	34.5	145	1770	16.409
255	M	11	150	51.8	150	1770	23.0222
256	M	11	158	53	158	1770	21.2306
257	M	11	145	34.5	145	1770	16.409
258	M	11	150	51.8	150	1770	23.0222
259	M	11	158	53	158	1770	21.2306
260	M	11	150	51.8	150	1770	23.0222
261	M	11	158	53	158	1770	21.2306
262	M	11	145	34.5	145	1770	16.409
263	M	11	143	44	143	1770	21.5169
264	M	11	155	40.5	155	1770.49	16.8574
265	M	11	136	33	136	1775	17.8417
266	M	11	136	33	136	1775	17.8417
267	M	11	136	33	136	1775	17.8417
268	M	11	144	52	144	1775	25.0772
269	M	11	155	44	155	1780	18.3143
270	M	11	160	52.2	160	1780	20.3906
271	M	11	155	44	155	1780	18.3143
272	M	11	160	52.2	160	1780	20.3906
273	M	11	160	52.2	160	1780	20.3906
274	M	11	155	44	155	1780	18.3143
275	M	11	140	50	140	1780.22	25.5102
276	M	11	148	40	148	1782	18.2159
277	M	11	158	42	158	1782	16.8242
278	M	11	148	40	148	1782	18.2159
279	M	11	158	42	158	1782	16.8242
280	M	11	158	42	158	1782	16.8242
281	M	11	140	44	140	1790	22.449
282	M	11	152	45	152	1791	19.4771
283	M	11	152	45	152	1791	19.4771
284	M	11	152	45	152	1791	19.4771
285	M	11	154	54	154	1796	22.7694
286	M	11	160	61	160	1800	23.9453
287	M	11	160	50	160	1800	19.5312
288	M	11	160	78	160	1800	30.4688
289	M	11	140	28	140	1800	14.2857
290	M	11	160	61	160	1800	23.9453
291	M	11	160	50	160	1800	19.5312
292	M	11	152.5	62	152.5	1800	26.6595
293	M	11	140	28	140	1800	14.2857
294	M	11	160	78	160	1800	30.4688
295	M	11	149	41.5	149	1802	18.6929
296	M	11	149	41.5	149	1802	18.6929
297	M	11	149	41.5	149	1802	18.6929
298	M	11	146	39	146	1806	18.2961
299	M	11	146	39	146	1806	18.2961
300	M	11	146	39	146	1806	18.2961
301	M	11	140	37	140	1812	18.8776
302	M	11	149	42.7	149	1812	19.2334
303	M	11	140	37	140	1812	18.8776
304	M	11	149	42.7	149	1812	19.2334
305	M	11	140	37	140	1812	18.8776
306	M	11	149	42.7	149	1812	19.2334
307	M	11	146	38	146	1820	17.827
308	M	11	151	51.2	151	1820	22.4552
309	M	11	146	38	146	1820	17.827
310	M	11	151	51.2	151	1820	22.4552
311	M	11	146	38	146	1820	17.827
312	M	11	151	51.2	151	1820	22.4552
313	M	11	148	43	148	1820	19.6311
314	M	11	145.5	43	145.5	1823	20.3115
315	M	11	145.5	43	145.5	1823	20.3115
316	M	11	145.5	43	145.5	1823	20.3115
317	M	11	142	42	142	1825	20.8292
318	M	11	142	42	142	1825	20.8292
319	M	11	142	42	142	1825	20.8292
320	M	11	138	32	138	1825.35	16.8032
321	M	11	152	40	152	1825.35	17.313
322	M	11	147	38	147	1825.35	17.5853
323	M	11	153	49.5	153	1825.35	21.1457
324	M	11	153	51	153	1830	21.7865
325	M	11	153	55.95	153	1830	23.9011
326	M	11	153	51	153	1830	21.7865
327	M	11	153	55.95	153	1830	23.9011
328	M	11	153	55.95	153	1830	23.9011
329	M	11	145	51.6	145	1830	24.5422
330	M	11	153	53.5	153	1831	22.8545
331	M	11	153	53.5	153	1831	22.8545
332	M	11	153	53.5	153	1831	22.8545
333	M	11	156	54	156	1833	22.1893
334	M	11	156	54	156	1833	22.1893
335	M	11	156	54	156	1833	22.1893
336	M	11	147	43	147	1836	19.8991
337	M	11	150	54	150	1836	24
338	M	11	155	45	155	1836	18.7305
339	M	11	147	29	147	1836	13.4203
340	M	11	147	43	147	1836	19.8991
341	M	11	150	54	150	1836	24
342	M	11	155	45	155	1836	18.7305
343	M	11	150	54	150	1836	24
344	M	11	155	45	155	1836	18.7305
345	M	11	147	43	147	1836	19.8991
346	M	11	147	29	147	1836	13.4203
347	M	11	156	44	156	1841	18.0802
348	M	11	165	55	165	1844	20.202
349	M	11	165	55	165	1844	20.202
350	M	11	142	40.9	142	1849.5	20.2837
351	M	11	142	40.9	142	1849.5	20.2837
352	M	11	142	40.9	142	1849.5	20.2837
353	M	11	150	49.2	150	1850	21.8667
354	M	11	166	54	166	1860	19.5965
355	M	11	166	54	166	1860	19.5965
356	M	11	166	54	166	1860	19.5965
357	M	11	150	56	150	1860	24.8889
358	M	11	155	40	155	1862.07	16.6493
359	M	11	147	43	147	1862.07	19.8991
360	M	11	149.5	44.6	149.5	1863	19.955
361	M	11	157	57.4	157	1863	23.2869
362	M	11	149.5	44.6	149.5	1863	19.955
363	M	11	157	57.4	157	1863	23.2869
364	M	11	149.5	44.6	149.5	1863	19.955
365	M	11	157	57.4	157	1863	23.2869
366	M	11	156	52	156	1869	21.3675
367	M	11	156	52	156	1869	21.3675
368	M	11	156	52	156	1869	21.3675
369	M	11	151	32.5	151	1870	14.2538
370	M	11	151	32.5	151	1870	14.2538
371	M	11	137	32	137	1872.83	17.0494
372	M	11	143	36.7	143	1874	17.9471
373	M	11	143	36.7	143	1874	17.9471
374	M	11	143	36.7	143	1874	17.9471
375	M	11	138	34	138	1875	17.8534
376	M	11	138	34	138	1875	17.8534
377	M	11	138	34	138	1875	17.8534
378	M	11	156	46.1	156	1878	18.9431
379	M	11	156	46.1	156	1878	18.9431
380	M	11	156	46.1	156	1878	18.9431
381	M	11	149	37	149	1878.26	16.6659
382	M	11	135	38	135	1878.26	20.8505
383	M	11	142	48	142	1880	23.8048
384	M	11	143	47	143	1880	22.984
385	M	11	134	54	134	1880	30.0735
386	M	11	142	48	142	1880	23.8048
387	M	11	143	47	143	1880	22.984
388	M	11	142	48	142	1880	23.8048
389	M	11	134	54	134	1880	30.0735
390	M	11	143	47	143	1880	22.984
391	M	11	152	44	152	1881	19.0443
392	M	11	152	44	152	1881	19.0443
393	M	11	152	44	152	1881	19.0443
394	M	11	158	44	158	1882	17.6254
395	M	11	158	44	158	1882	17.6254
396	M	11	158	44	158	1882	17.6254
397	M	11	140	35	140	1890	17.8571
398	M	11	142	31	142	1890	15.3739
399	M	11	147	45	147	1890	20.8247
400	M	11	154	40	154	1890	16.8663
401	M	11	140	35	140	1890	17.8571
402	M	11	142	31	142	1890	15.3739
403	M	11	147	45	147	1890	20.8247
404	M	11	154	40	154	1890	16.8663
405	M	11	147	45	147	1890	20.8247
406	M	11	142	31	142	1890	15.3739
407	M	11	140	35	140	1890	17.8571
408	M	11	154	40	154	1890	16.8663
409	M	11	142	42	142	1890	20.8292
410	M	11	148	49	148	1890	22.3703
411	M	11	145	31	145	1893	14.7444
412	M	11	145	31	145	1893	14.7444
413	M	11	152	50	152	1894	21.6413
414	M	11	152	50	152	1894	21.6413
415	M	11	152	50	152	1894	21.6413
416	M	11	145	41.6	145	1895	19.786
417	M	11	145	41.6	145	1895	19.786
418	M	11	145	41.6	145	1895	19.786
419	M	11	150	41	150	1896	18.2222
420	M	11	152	37	152	1896	16.0145
421	M	11	150	41	150	1896	18.2222
422	M	11	152	37	152	1896	16.0145
423	M	11	152	37	152	1896	16.0145
424	M	11	150	41	150	1896	18.2222
425	M	11	151	45	151	1900	19.736
426	M	11	155	44.5	155	1900	18.5224
427	M	11	151	45	151	1900	19.736
428	M	11	155	44.5	155	1900	18.5224
429	M	11	155	44.5	155	1900	18.5224
430	M	11	148.5	41.7	148.5	1904	18.9096
431	M	11	154	45.3	154	1904	19.101
432	M	11	148.5	41.7	148.5	1904	18.9096
433	M	11	154	45.3	154	1904	19.101
434	M	11	154	45.3	154	1904	19.101
435	M	11	148.5	41.7	148.5	1904	18.9096
436	M	11	144	38	144	1905	18.3256
437	M	11	144	38	144	1905	18.3256
438	M	11	144	38	144	1905	18.3256
439	M	11	153	38	153	1905.88	16.2331
440	M	11	147	40.6	147	1910	18.7885
441	M	11	142	34	142	1910	16.8617
442	M	11	147	40.6	147	1910	18.7885
443	M	11	142	34	142	1910	16.8617
444	M	11	147	40.6	147	1910	18.7885
445	M	11	142	34	142	1910	16.8617
446	M	11	147	35	147	1911.5	16.197
447	M	11	153	47	153	1912	20.0777
448	M	11	153	47	153	1912	20.0777
449	M	11	147	51	147	1915	23.6013
450	M	11	155	50	155	1916	20.8117
451	M	11	155	50	155	1916	20.8117
452	M	11	144	38	144	1917.16	18.3256
453	M	11	147	33	147	1920	15.2714
454	M	11	157	48.2	157	1920	19.5545
455	M	11	147	33	147	1920	15.2714
456	M	11	157	48.2	157	1920	19.5545
457	M	11	157	48.2	157	1920	19.5545
458	M	11	147	33	147	1920	15.2714
459	M	11	135	27	135	1925	14.8148
460	M	11	151	51.5	151	1925	22.5867
461	M	11	158	38	158	1928.57	15.2219
462	M	11	138	35	138	1928.57	18.3785
463	M	11	138	33	138	1930	17.3283
464	M	11	158	52	158	1930	20.83
465	M	11	138	33	138	1930	17.3283
466	M	11	158	52	158	1930	20.83
467	M	11	158	52	158	1930	20.83
468	M	11	138	33	138	1930	17.3283
469	M	11	151	54	151	1933	23.6832
470	M	11	160	49.5	160	1940	19.3359
471	M	11	160	49.5	160	1940	19.3359
472	M	11	160	49.5	160	1940	19.3359
473	M	11	147	41.2	147	1944	19.0661
474	M	11	148	45	148	1944	20.5442
475	M	11	148	38	148	1944	17.3484
476	M	11	149	50	149	1944	22.5215
477	M	11	149	51	149	1944	22.9719
478	M	11	151	44.8	151	1944	19.6483
479	M	11	147	41.2	147	1944	19.0661
480	M	11	148	45	148	1944	20.5442
481	M	11	148	38	148	1944	17.3484
482	M	11	149	50	149	1944	22.5215
483	M	11	149	51	149	1944	22.9719
484	M	11	151	44.8	151	1944	19.6483
485	M	11	148	38	148	1944	17.3484
486	M	11	148	45	148	1944	20.5442
487	M	11	149	50	149	1944	22.5215
488	M	11	149	51	149	1944	22.9719
489	M	11	151	44.8	151	1944	19.6483
490	M	11	147	41.2	147	1944	19.0661
491	M	11	152	41.1	152	1945	17.7891
492	M	11	152	41.1	152	1945	17.7891
493	M	11	152	41.1	152	1945	17.7891
494	M	11	147	42	147	1950	19.4363
495	M	11	147	42	147	1950	19.4363
496	M	11	147	42	147	1950	19.4363
497	M	11	145	36	145	1955	17.1225
498	M	11	145	36	145	1955	17.1225
499	M	11	145	36	145	1955	17.1225
500	M	11	143	35.6	143	1958	17.4092
501	M	11	143	35.6	143	1958	17.4092
502	M	11	143	35.6	143	1958	17.4092
503	M	11	147	38	147	1960	17.5853
504	M	11	149	49.8	149	1960	22.4314
505	M	11	154	50	154	1960	21.0828
506	M	11	155	52.1	155	1960	21.6857
507	M	11	156	45	156	1960	18.4911
508	M	11	147	38	147	1960	17.5853
509	M	11	149	49.8	149	1960	22.4314
510	M	11	154	50	154	1960	21.0828
511	M	11	155	52.1	155	1960	21.6857
512	M	11	156	45	156	1960	18.4911
513	M	11	149	39	149	1960	17.5668
514	M	11	155	52.1	155	1960	21.6857
515	M	11	149	49.8	149	1960	22.4314
516	M	11	154	50	154	1960	21.0828
517	M	11	147	38	147	1960	17.5853
518	M	11	156	45	156	1960	18.4911
519	M	11	157	42	157	1960	17.0392
520	M	11	141	35	141	1963.64	17.6047
521	M	11	144	37	144	1963.64	17.8434
522	M	11	147	41	147	1963.64	18.9736
523	M	11	170	56	170	1963.64	19.3772
524	M	11	150	49.4	150	1965	21.9556
525	M	11	154	42.75	154	1970	18.0258
526	M	11	146	33.3	146	1971	15.6221
527	M	11	146	33.3	146	1971	15.6221
528	M	11	146	33.3	146	1971	15.6221
529	M	11	154	48	154	1978	20.2395
530	M	11	154	48	154	1978	20.2395
531	M	11	154	48	154	1978	20.2395
532	M	11	151	49.5	151	1980	21.7096
533	M	11	146	46	146	1980	21.58
534	M	11	151	49.5	151	1980	21.7096
535	M	11	146	46	146	1980	21.58
536	M	11	160	48.5	160	1980	18.9453
537	M	11	151	49.5	151	1980	21.7096
538	M	11	146	46	146	1980	21.58
539	M	11	143	32	143	1981.65	15.6487
540	M	11	153	42.5	153	1984	18.1554
541	M	11	153	42.5	153	1984	18.1554
542	M	11	153	42.5	153	1984	18.1554
543	M	11	154	44	154	1989	18.5529
544	M	11	154	44	154	1989	18.5529
545	M	11	154	44	154	1989	18.5529
546	M	11	140	42	140	1990	21.4286
547	M	11	156	65.5	156	1993.85	26.9149
548	M	11	140	32	140	1995	16.3265
549	M	11	140	32	140	1995	16.3265
550	M	11	140	32	140	1995	16.3265
551	M	11	141	35	141	1998	17.6047
552	M	11	140	29	140	1998	14.7959
553	M	11	141	35	141	1998	17.6047
554	M	11	141	35	141	1998	17.6047
555	M	11	140	29	140	1998	14.7959
556	M	11	140	33	140	1999	16.8367
557	M	11	150	37.95	150	2000	16.8667
558	M	11	132	35.5	132	2000	20.3742
559	M	11	142	37	142	2000	18.3495
560	M	11	162.5	37	162.5	2000	14.0118
561	M	11	150	37.95	150	2000	16.8667
562	M	11	132	35.5	132	2000	20.3742
563	M	11	142	37	142	2000	18.3495
564	M	11	146	35	146	2000	16.4196
565	M	11	150	39	150	2000	17.3333
566	M	11	150	37.95	150	2000	16.8667
567	M	11	132	35.5	132	2000	20.3742
568	M	11	162.5	37	162.5	2000	14.0118
569	M	11	142	37	142	2000	18.3495
570	M	11	139	31.7	139	2007	16.407
571	M	11	139	31.7	139	2007	16.407
572	M	11	139	31.7	139	2007	16.407
573	M	11	145.5	35.3	145.5	2010	16.6743
574	M	11	145.5	35.3	145.5	2010	16.6743
575	M	11	145.5	35.3	145.5	2010	16.6743
576	M	11	141	31	141	2011	15.5928
577	M	11	141	31	141	2011	15.5928
578	M	11	141	31	141	2011	15.5928
579	M	11	153	46.9	153	2012	20.035
580	M	11	153	46.9	153	2012	20.035
581	M	11	153	46.9	153	2012	20.035
582	M	11	150	32	150	2012.42	14.2222
583	M	11	146	35.4	146	2014	16.6072
584	M	11	146	35.4	146	2014	16.6072
585	M	11	146	35.4	146	2014	16.6072
586	M	11	152	40	152	2016	17.313
587	M	11	160	48	160	2016	18.75
588	M	11	161	61	161	2016	23.533
589	M	11	152	40	152	2016	17.313
590	M	11	160	48	160	2016	18.75
591	M	11	161	61	161	2016	23.533
592	M	11	161	61	161	2016	23.533
593	M	11	152	40	152	2016	17.313
594	M	11	160	48	160	2016	18.75
595	M	11	149	37	149	2019	16.6659
596	M	11	149	37	149	2019	16.6659
597	M	11	158	48	158	2022	19.2277
598	M	11	158	48	158	2022	19.2277
599	M	11	158	48	158	2022	19.2277
600	M	11	149	39	149	2025	17.5668
601	M	11	149	39	149	2025	17.5668
602	M	11	160	52	160	2025	20.3125
603	M	11	149	39	149	2025	17.5668
604	M	11	136	33.8	136	2030	18.2742
605	M	11	139	29	139	2030	15.0096
606	M	11	136	33.8	136	2030	18.2742
607	M	11	139	29	139	2030	15.0096
608	M	11	136	33.8	136	2030	18.2742
609	M	11	158	45	158	2030	18.026
610	M	11	147	45	147	2030	20.8247
611	M	11	143	38	143	2031.35	18.5828
612	M	11	154	45	154	2031.35	18.9745
613	M	11	153	50	153	2031.35	21.3593
614	M	11	139	32	139	2033	16.3035
615	M	11	139	32	139	2033	16.3035
616	M	11	147	34	147	2035	15.7342
617	M	11	147	34	147	2035	15.7342
618	M	11	147	34	147	2035	15.7342
619	M	11	163	47	163	2036	17.6898
620	M	11	163	60	163	2038	22.5827
621	M	11	163	60	163	2038	22.5827
622	M	11	163	60	163	2038	22.5827
623	M	11	136.5	41.5	136.5	2040	22.2732
624	M	11	150	39	150	2040	17.3333
625	M	11	138	31.8	138	2042	16.6982
626	M	11	143	30	143	2042	14.6706
627	M	11	138	31.8	138	2042	16.6982
628	M	11	138	31.8	138	2042	16.6982
629	M	11	143	30	143	2042	14.6706
630	M	11	151.5	51.8	151.5	2044	22.5686
631	M	11	151.5	51.8	151.5	2044	22.5686
632	M	11	151.5	51.8	151.5	2044	22.5686
633	M	11	149	48	149	2044.16	21.6206
634	M	11	140	35	140	2050	17.8571
635	M	11	140	35	140	2050	17.8571
636	M	11	140	35	140	2050	17.8571
637	M	11	149	38	149	2050.63	17.1163
638	M	11	142	40	142	2050.63	19.8373
639	M	11	145	41.1	145	2052	19.5482
640	M	11	150	43.2	150	2052	19.2
641	M	11	155	56.7	155	2052	23.6004
642	M	11	155	50.6	155	2052	21.0614
643	M	11	138	41	138	2052	21.5291
644	M	11	147	42.1	147	2052	19.4826
645	M	11	149	35	149	2052	15.7651
646	M	11	150	59	150	2052	26.2222
647	M	11	145	41.1	145	2052	19.5482
648	M	11	150	43.2	150	2052	19.2
649	M	11	155	56.7	155	2052	23.6004
650	M	11	155	50.6	155	2052	21.0614
651	M	11	138	41	138	2052	21.5291
652	M	11	147	42.1	147	2052	19.4826
653	M	11	149	35	149	2052	15.7651
654	M	11	150	59	150	2052	26.2222
655	M	11	138	41	138	2052	21.5291
656	M	11	147	42.1	147	2052	19.4826
657	M	11	149	35	149	2052	15.7651
658	M	11	145	41.1	145	2052	19.5482
659	M	11	155	56.7	155	2052	23.6004
660	M	11	155	50.6	155	2052	21.0614
661	M	11	150	43.2	150	2052	19.2
662	M	11	140	33.7	140	2052	17.1939
663	M	11	150	52	150	2053	23.2444
664	M	11	150	52	150	2053	23.2444
665	M	11	149	47	149	2057.14	21.1702
666	M	11	146	38	146	2058	17.827
667	M	11	146	38	146	2058	17.827
668	M	11	146	38	146	2058	17.827
669	M	11	136	30	136	2060	16.2197
670	M	11	157	40	157	2060	16.2278
671	M	11	145	40	145	2063	19.025
672	M	11	145	40	145	2063	19.025
673	M	11	145	40	145	2063	19.025
674	M	11	143	32	143	2065	15.6487
675	M	11	161	52	161	2065	20.061
676	M	11	143	32	143	2065	15.6487
677	M	11	161	52	161	2065	20.061
678	M	11	143	32	143	2065	15.6487
679	M	11	161	52	161	2065	20.061
680	M	11	148	40	148	2070	18.1245
681	M	11	148	40	148	2070	18.1245
682	M	11	146	40	146	2070	18.7652
683	M	11	150	35	150	2076.92	15.5556
684	M	11	140	32.5	140	2076.92	16.5816
685	M	11	138	32	138	2076.92	16.8032
686	M	11	166	65	166	2077	23.5883
687	M	11	166	65	166	2077	23.5883
688	M	11	166	65	166	2077	23.5883
689	M	11	149	35	149	2079	15.7651
690	M	11	149	35	149	2079	15.7651
691	M	11	149	35	149	2079	15.7651
692	M	11	152	48.3	152	2080	20.9055
693	M	11	152	48.3	152	2080	20.9055
694	M	11	153	47	153	2080	20.0777
695	M	11	144	40	144	2080	19.2901
696	M	11	152	48.3	152	2080	20.9055
697	M	11	155	40	155	2083.6	16.6493
698	M	11	149	38	149	2083.6	17.1163
699	M	11	133	28	133	2090.32	15.829
700	M	11	147	39	147	2095	18.048
701	M	11	147	39	147	2095	18.048
702	M	11	147	39	147	2095	18.048
703	M	11	155	44	155	2097.09	18.3143
704	M	11	143	34.1	143	2100	16.6756
705	M	11	146	39	146	2100	18.2961
706	M	11	143	34.1	143	2100	16.6756
707	M	11	146	39	146	2100	18.2961
708	M	11	143	34.1	143	2100	16.6756
709	M	11	146	39	146	2100	18.2961
710	M	11	148	31	148	2100	14.1527
711	M	11	172	49.5	172	2103.9	16.732
712	M	11	159	58	159	2103.9	22.9421
713	M	11	140	36	140	2106	18.3673
714	M	11	145	44	145	2106	20.9275
715	M	11	148	35	148	2106	15.9788
716	M	11	158	48	158	2106	19.2277
717	M	11	155	36.4	155	2106	15.1509
718	M	11	140	36	140	2106	18.3673
719	M	11	145	44	145	2106	20.9275
720	M	11	148	35	148	2106	15.9788
721	M	11	158	48	158	2106	19.2277
722	M	11	140	36	140	2106	18.3673
723	M	11	158	48	158	2106	19.2277
724	M	11	145	44	145	2106	20.9275
725	M	11	148	35	148	2106	15.9788
726	M	11	149	36.1	149	2106	16.2605
727	M	11	155	36.4	155	2106	15.1509
728	M	11	158	40	158	2107	16.0231
729	M	11	158	40	158	2107	16.0231
730	M	11	158	40	158	2107	16.0231
731	M	11	142	35	142	2110.75	17.3577
732	M	11	144	33.5	144	2115	16.1555
733	M	11	144	33.5	144	2115	16.1555
734	M	11	144	33.5	144	2115	16.1555
735	M	11	147	37	147	2116	16.9374
736	M	11	147	37	147	2116	16.9374
737	M	11	146	46	146	2117.65	21.58
738	M	11	149	39	149	2120	17.5668
739	M	11	156	40.6	156	2120	16.6831
740	M	11	149	39	149	2120	17.5668
741	M	11	156	40.6	156	2120	16.6831
742	M	11	149	39	149	2120	17.5668
743	M	11	156	40.6	156	2120	16.6831
744	M	11	160	51.2	160	2122	20
745	M	11	160	51.2	160	2122	20
746	M	11	160	51.2	160	2122	20
747	M	11	150	48	150	2124.59	21.3333
748	M	11	150	40	150	2131	17.7778
749	M	11	150	40	150	2131	17.7778
750	M	11	150	40	150	2131	17.7778
751	M	11	157	53	157	2132	21.5019
752	M	11	157	53	157	2132	21.5019
753	M	11	157	53	157	2132	21.5019
754	M	11	148	31	148	2138	14.1527
755	M	11	144	35.8	144	2139	17.2647
756	M	11	144	35.8	144	2139	17.2647
757	M	11	144	35.8	144	2139	17.2647
758	M	11	150	37.1	150	2140	16.4889
759	M	11	150	37.1	150	2140	16.4889
760	M	11	150	37.1	150	2140	16.4889
761	M	11	146	45	146	2145.7	21.1109
762	M	11	146	42	146	2146	19.6566
763	M	11	146	42	146	2146	19.6566
764	M	11	149	39	149	2147	17.5668
765	M	11	149	39	149	2147	17.5668
766	M	11	149	39	149	2147	17.5668
767	M	11	145	39.75	145	2150	18.9061
768	M	11	145	39.75	145	2150	18.9061
769	M	11	145	39.75	145	2150	18.9061
770	M	11	137	33	137	2152.82	17.5822
771	M	11	147	40	147	2152.82	18.5108
772	M	11	160	52	160	2152.82	20.3125
773	M	11	152	49	152	2155	21.2084
774	M	11	152	49	152	2155	21.2084
775	M	11	152	49	152	2155	21.2084
776	M	11	139	37.9	139	2160	19.616
777	M	11	147	35	147	2160	16.197
778	M	11	153	55	153	2160	23.4952
779	M	11	139	37.9	139	2160	19.616
780	M	11	147	35	147	2160	16.197
781	M	11	153	55	153	2160	23.4952
782	M	11	153	55	153	2160	23.4952
783	M	11	147	35	147	2160	16.197
784	M	11	140	28	140	2160	14.2857
785	M	11	151.5	37.5	151.5	2160	16.3383
786	M	11	139.5	31	139.5	2160	15.9299
787	M	11	139	37.9	139	2160	19.616
788	M	11	155.5	45	155.5	2162	18.6102
789	M	11	155.5	45	155.5	2162	18.6102
790	M	11	155.5	45	155.5	2162	18.6102
791	M	11	144	35.3	144	2164	17.0235
792	M	11	144	35.3	144	2164	17.0235
793	M	11	144	35.3	144	2164	17.0235
794	M	11	157	39	157	2165	15.8221
795	M	11	157	39	157	2165	15.8221
796	M	11	157	39	157	2165	15.8221
797	M	11	148	36	148	2174	16.4354
798	M	11	148	36	148	2174	16.4354
799	M	11	148	36	148	2174	16.4354
800	M	11	159	53.5	159	2175	21.1621
801	M	11	148	32	148	2175	14.6092
802	M	11	159	53.5	159	2175	21.1621
803	M	11	159	53.5	159	2175	21.1621
804	M	11	148	32	148	2175	14.6092
805	M	11	152	36.5	152	2187	15.7981
806	M	11	152	36.5	152	2187	15.7981
807	M	11	152	36.5	152	2187	15.7981
808	M	11	150	41	150	2189.19	18.2222
809	M	11	162	52.4	162	2190	19.9665
810	M	11	162	52.4	162	2190	19.9665
811	M	11	162	52.4	162	2190	19.9665
812	M	11	154	44	154	2192	18.5529
813	M	11	154	44	154	2192	18.5529
814	M	11	154	44	154	2192	18.5529
815	M	11	149	39	149	2194	17.5668
816	M	11	149	39	149	2194	17.5668
817	M	11	149	39	149	2194	17.5668
818	M	11	166	51	166	2196.61	18.5078
819	M	11	142	38	142	2200	18.6967
820	M	11	150	32	150	2200	14.2222
821	M	11	154	40	154	2200	16.8663
822	M	11	147	41	147	2200	18.9736
823	M	11	142	38	142	2200	18.6967
824	M	11	150	32	150	2200	14.2222
825	M	11	154	40	154	2200	16.8663
826	M	11	147	41	147	2200	18.9736
827	M	11	147	41	147	2200	18.9736
828	M	11	156	37	156	2202	15.3431
829	M	11	156	37	156	2202	15.3431
830	M	11	152	34	152	2205	14.6728
831	M	11	152	34	152	2205	14.6728
832	M	11	156	51.7	156	2210	21.2442
833	M	11	147	43.5	147	2210	20.1305
834	M	11	156	51.7	156	2210	21.2442
835	M	11	147	43.5	147	2210	20.1305
836	M	11	156	51.7	156	2210	21.2442
837	M	11	147	43.5	147	2210	20.1305
838	M	11	149	36	149	2211.6	16.2155
839	M	11	134	30	134	2214	16.7075
840	M	11	139	41	139	2214	21.2204
841	M	11	147	35	147	2214	16.197
842	M	11	134	30	134	2214	16.7075
843	M	11	139	41	139	2214	21.2204
844	M	11	147	35	147	2214	16.197
845	M	11	139	41	139	2214	21.2204
846	M	11	153	52	153	2214	22.2137
847	M	11	162	57	162	2214	21.7193
848	M	11	147	35	147	2214	16.197
849	M	11	134	30	134	2214	16.7075
850	M	11	138	30	138	2219.18	15.753
851	M	11	151	44	151	2219.18	19.2974
852	M	11	160	54	160	2219.18	21.0938
853	M	11	155	39.5	155	2220	16.4412
854	M	11	155	39.5	155	2220	16.4412
855	M	11	155	39.5	155	2220	16.4412
856	M	11	150	53	150	2221	23.5556
857	M	11	145	44	145	2224	20.9275
858	M	11	145	44	145	2224	20.9275
859	M	11	145	44	145	2224	20.9275
860	M	11	159	48	159	2231	18.9866
861	M	11	159	48	159	2231	18.9866
862	M	11	159	48	159	2231	18.9866
863	M	11	128	25	128	2234.48	15.2588
864	M	11	151	34	151	2235	14.9116
865	M	11	151	34	151	2235	14.9116
866	M	11	148	35	148	2239	16.0701
867	M	11	148	35	148	2239	16.0701
868	M	11	155	41.2	155	2240	17.1488
869	M	11	155	41.2	155	2240	17.1488
870	M	11	155	41.2	155	2240	17.1488
871	M	11	145	38.8	145	2241	18.4542
872	M	11	145	38.8	145	2241	18.4542
873	M	11	145	38.8	145	2241	18.4542
874	M	11	155	54	155	2242.21	22.4766
875	M	11	145	30	145	2247	14.2687
876	M	11	145	30	145	2247	14.2687
877	M	11	155	49	155	2250	20.3954
878	M	11	162	46.3	162	2250	17.6421
879	M	11	155	49	155	2250	20.3954
880	M	11	162	46.3	162	2250	17.6421
881	M	11	175	44	175	2250	14.3673
882	M	11	162	46.3	162	2250	17.6421
883	M	11	155	49	155	2250	20.3954
884	M	11	148	41	148	2257.84	18.718
885	M	11	150	47	150	2258	20.8889
886	M	11	150	47	150	2258	20.8889
887	M	11	150	47	150	2258	20.8889
888	M	11	144	36	144	2260	17.3611
889	M	11	144	36	144	2260	17.3611
890	M	11	145	38	145	2260	18.0737
891	M	11	147	33	147	2264	15.2714
892	M	11	147	37	147	2264	17.1225
893	M	11	147	33	147	2264	15.2714
894	M	11	147	37	147	2264	17.1225
895	M	11	147	33	147	2264	15.2714
896	M	11	147	37	147	2264	17.1225
897	M	11	129	34	129	2265.73	20.4315
898	M	11	133	33	133	2268	18.6557
899	M	11	142	33	142	2268	16.3658
900	M	11	148	35	148	2268	15.9788
901	M	11	148	41	148	2268	18.718
902	M	11	149	50	149	2268	22.5215
903	M	11	150	40	150	2268	17.7778
904	M	11	150	43	150	2268	19.1111
905	M	11	151	46.9	151	2268	20.5693
906	M	11	151	44.9	151	2268	19.6921
907	M	11	155	41.5	155	2268	17.2737
908	M	11	148	32	148	2268	14.6092
909	M	11	133	33	133	2268	18.6557
910	M	11	142	33	142	2268	16.3658
911	M	11	148	35	148	2268	15.9788
912	M	11	148	41	148	2268	18.718
913	M	11	149	50	149	2268	22.5215
914	M	11	150	40	150	2268	17.7778
915	M	11	150	43	150	2268	19.1111
916	M	11	151	46.9	151	2268	20.5693
917	M	11	151	44.9	151	2268	19.6921
918	M	11	155	41.5	155	2268	17.2737
919	M	11	148	32	148	2268	14.6092
920	M	11	149	50	149	2268	22.5215
921	M	11	148	41	148	2268	18.718
922	M	11	150	43	150	2268	19.1111
923	M	11	148	35	148	2268	15.9788
924	M	11	133	33	133	2268	18.6557
925	M	11	150	40	150	2268	17.7778
926	M	11	142	33	142	2268	16.3658
927	M	11	151	44.9	151	2268	19.6921
928	M	11	151	46.9	151	2268	20.5693
929	M	11	155	41.5	155	2268	17.2737
930	M	11	146	34	146	2271	15.9505
931	M	11	171	56	171	2275	19.1512
932	M	11	171	56	171	2275	19.1512
933	M	11	171	56	171	2275	19.1512
934	M	11	147	30	147	2277	13.8831
935	M	11	147	30	147	2277	13.8831
936	M	11	140	34	140	2280	17.3469
937	M	11	144	34	144	2280	16.3966
938	M	11	152	42.1	152	2280	18.222
939	M	11	152.5	43	152.5	2280	18.4897
940	M	11	153	46	153	2280	19.6506
941	M	11	154	44.5	154	2280	18.7637
942	M	11	140	34	140	2280	17.3469
943	M	11	144	34	144	2280	16.3966
944	M	11	152	42.1	152	2280	18.222
945	M	11	152.5	43	152.5	2280	18.4897
946	M	11	153	46	153	2280	19.6506
947	M	11	154	44.5	154	2280	18.7637
948	M	11	152.5	43	152.5	2280	18.4897
949	M	11	154	44.5	154	2280	18.7637
950	M	11	152	42.1	152	2280	18.222
951	M	11	152	42.1	152	2280	18.222
952	M	11	153	46	153	2280	19.6506
953	M	11	140	34	140	2280	17.3469
954	M	11	144	34	144	2280	16.3966
955	M	11	147	42	147	2289.75	19.4363
956	M	11	158	44	158	2293	17.6254
957	M	11	158	44	158	2293	17.6254
958	M	11	158	44	158	2293	17.6254
959	M	11	150	41.5	150	2297.87	18.4444
960	M	11	150	40	150	2300	17.7778
961	M	11	160	39	160	2300	15.2344
962	M	11	150	40	150	2300	17.7778
963	M	11	160	39	160	2300	15.2344
964	M	11	160	39	160	2300	15.2344
965	M	11	150	40	150	2300	17.7778
966	M	11	150	42	150	2300	18.6667
967	M	11	152	34	152	2305	14.7161
968	M	11	151	37	151	2306.05	16.2274
969	M	11	155	40	155	2306.05	16.6493
970	M	11	145	32	145	2310	15.22
971	M	11	146	35	146	2310	16.4196
972	M	11	159	46	159	2310	18.1955
973	M	11	145	32	145	2310	15.22
974	M	11	146	35	146	2310	16.4196
975	M	11	159	46	159	2310	18.1955
976	M	11	145	32	145	2310	15.22
977	M	11	146	35	146	2310	16.4196
978	M	11	145	32	145	2310	15.22
979	M	11	159	46	159	2310	18.1955
980	M	11	146	38	146	2310	17.827
981	M	11	145	44	145	2310	20.9275
982	M	11	137	32	137	2310	17.0494
983	M	11	139	31	139	2314	16.0447
984	M	11	145	37.6	145	2322	17.8835
985	M	11	145	37.6	145	2322	17.8835
986	M	11	145	37.6	145	2322	17.8835
987	M	11	150	42	150	2330.94	18.6667
988	M	11	132	31.5	132	2340	18.0785
989	M	11	132	31.5	132	2340	18.0785
990	M	11	150	42	150	2340	18.6667
991	M	11	147.5	50.2	147.5	2340	23.0738
992	M	11	152	42.8	152	2340	18.5249
993	M	11	163	53	163	2340	19.9481
994	M	11	153	47.5	153	2340	20.2913
995	M	11	140.5	33	140.5	2340	16.7171
996	M	11	148	41	148	2340	18.718
997	M	11	148	35	148	2340	15.9788
998	M	11	132	31.5	132	2340	18.0785
999	M	11	147	46	147	2350	21.2874
1000	M	11	147	46	147	2350	21.2874
1001	M	11	142	31.6	142	2352	15.6715
1002	M	11	142	31.6	142	2352	15.6715
1003	M	11	142	31.6	142	2352	15.6715
1004	M	11	147	36	147	2361	16.6597
1005	M	11	147	36	147	2361	16.6597
1006	M	11	147	36	147	2361	16.6597
1007	M	11	138	30	138	2362	15.753
1008	M	11	138	30	138	2362	15.753
1009	M	11	138	30	138	2362	15.753
1010	M	11	152	35	152	2364.96	15.1489
1011	M	11	148	32.5	148	2367	14.8375
1012	M	11	148	32.5	148	2367	14.8375
1013	M	11	145	34	145	2370	16.1712
1014	M	11	145	34	145	2370	16.1712
1015	M	11	145	34	145	2370	16.1712
1016	M	11	150	38	150	2373.63	16.8889
1017	M	11	152	41	152	2373.63	17.7458
1018	M	11	153	44.5	153	2375	19.0098
1019	M	11	153	44.5	153	2375	19.0098
1020	M	11	153	44.5	153	2375	19.0098
1021	M	11	148.5	35.1	148.5	2376	15.9167
1022	M	11	150	50	150	2376	22.2222
1023	M	11	148.5	35.1	148.5	2376	15.9167
1024	M	11	150	50	150	2376	22.2222
1025	M	11	150	50	150	2376	22.2222
1026	M	11	148.5	35.1	148.5	2376	15.9167
1027	M	11	146	35	146	2380	16.4196
1028	M	11	146	35	146	2380	16.4196
1029	M	11	146	35	146	2380	16.4196
1030	M	11	151	36	151	2382.35	15.7888
1031	M	11	154.5	46.7	154.5	2385	19.5641
1032	M	11	154.5	46.7	154.5	2385	19.5641
1033	M	11	154.5	46.7	154.5	2385	19.5641
1034	M	11	134	29	134	2390	16.1506
1035	M	11	134	29	134	2390	16.1506
1036	M	11	134	29	134	2390	16.1506
1037	M	11	143	38.5	143	2399	18.8273
1038	M	11	143	38.5	143	2399	18.8273
1039	M	11	143	38.5	143	2399	18.8273
1040	M	11	144	33	144	2400	15.9144
1041	M	11	156	46	156	2400	18.902
1042	M	11	156	54	156	2400	22.1893
1043	M	11	144	33	144	2400	15.9144
1044	M	11	156	46	156	2400	18.902
1045	M	11	156	54	156	2400	22.1893
1046	M	11	139	25	139	2400	12.9393
1047	M	11	156	41	156	2400	16.8475
1048	M	11	142	40	142	2400	19.8373
1049	M	11	155	40	155	2400	16.6493
1050	M	11	150	41	150	2400	18.2222
1051	M	11	152	50	152	2400	21.6413
1052	M	11	156	54	156	2400	22.1893
1053	M	11	156	46	156	2400	18.902
1054	M	11	136	37	136	2415	20.0043
1055	M	11	136	37	136	2415	20.0043
1056	M	11	136	37	136	2415	20.0043
1057	M	11	130	27	130	2430	15.7396
1058	M	11	150	38.7	150	2430	17.2
1059	M	11	152	51	152	2430	22.0741
1060	M	11	136	26	136	2430	14.0571
1061	M	11	130	27	130	2430	15.7396
1062	M	11	150	38.7	150	2430	17.2
1063	M	11	152	51	152	2430	22.0741
1064	M	11	152	51	152	2430	22.0741
1065	M	11	150	38.7	150	2430	17.2
1066	M	11	142	35	142	2434	17.3577
1067	M	11	142	35	142	2434	17.3577
1068	M	11	142	35	142	2434	17.3577
1069	M	11	132	26	132	2436.09	14.9219
1070	M	11	139	32	139	2436.09	16.5623
1071	M	11	155	43	155	2442	17.9813
1072	M	11	155	43	155	2442	17.9813
1073	M	11	142	33	142	2445.28	16.3658
1074	M	11	146	42	146	2450	19.7035
1075	M	11	140	30	140	2451	15.3061
1076	M	11	140	30	140	2451	15.3061
1077	M	11	140	30	140	2451	15.3061
1078	M	11	151	35	151	2454.55	15.3502
1079	M	11	148	41.5	148	2455	18.9463
1080	M	11	148	41.5	148	2455	18.9463
1081	M	11	148	41.5	148	2455	18.9463
1082	M	11	143	38.5	143	2457	18.8273
1083	M	11	143	38.5	143	2457	18.8273
1084	M	11	143	38.5	143	2457	18.8273
1085	M	11	157	45	157	2460	18.2563
1086	M	11	157	45	157	2460	18.2563
1087	M	11	157	45	157	2460	18.2563
1088	M	11	152	37	152	2461	15.9713
1089	M	11	152	37	152	2461	15.9713
1090	M	11	150	39	150	2470	17.3333
1091	M	11	150	39	150	2470	17.3333
1092	M	11	150	39	150	2470	17.3333
1093	M	11	144	37	144	2472	17.8434
1094	M	11	144	37	144	2472	17.8434
1095	M	11	144	37	144	2472	17.8434
1096	M	11	159	60	159	2473.28	23.7332
1097	M	11	154	41	154	2475	17.2879
1098	M	11	154	41	154	2475	17.2879
1099	M	11	154	41	154	2475	17.2879
1100	M	11	149	36	149	2478	16.2155
1101	M	11	149	36	149	2478	16.2155
1102	M	11	149	36	149	2478	16.2155
1103	M	11	150	38	150	2498	16.9333
1104	M	11	150	38	150	2498	16.9333
1105	M	11	148	36	148	2505	16.4354
1106	M	11	148	36	148	2505	16.4354
1107	M	11	148	36	148	2505	16.4354
1108	M	11	146	42.8	146	2511	20.0788
1109	M	11	146	42.8	146	2511	20.0788
1110	M	11	146	42.8	146	2511	20.0788
1111	M	11	146	32	146	2511.63	15.0122
1112	M	11	145	37	145	2520	17.5981
1113	M	11	141	31.7	141	2521	15.9449
1114	M	11	141	31.7	141	2521	15.9449
1115	M	11	141	31.7	141	2521	15.9449
1116	M	11	147	33	147	2538	15.2714
1117	M	11	147	33	147	2538	15.2714
1118	M	11	147	33	147	2538	15.2714
1119	M	11	148	44	148	2545	20.0877
1120	M	11	148	44	148	2545	20.0877
1121	M	11	148	44	148	2545	20.0877
1122	M	11	154	36	154	2547	15.1796
1123	M	11	154	42	154	2547	17.7096
1124	M	11	154	36	154	2547	15.1796
1125	M	11	154	42	154	2547	17.7096
1126	M	11	154	36	154	2547	15.1796
1127	M	11	154	42	154	2547	17.7096
1128	M	11	139	30.6	139	2552	15.8377
1129	M	11	139	30.6	139	2552	15.8377
1130	M	11	139	30.6	139	2552	15.8377
1131	M	11	148	42	148	2560	19.1746
1132	M	11	153	48	153	2560	20.5049
1133	M	11	142	32.5	142	2571.43	16.1178
1134	M	11	146	46.5	146	2571.43	21.8146
1135	M	11	145	38.5	145	2580	18.3115
1136	M	11	149	40.2	149	2581	18.1073
1137	M	11	149	40.2	149	2581	18.1073
1138	M	11	149	40.2	149	2581	18.1073
1139	M	11	145	35	145	2591	16.6468
1140	M	11	145	35	145	2591	16.6468
1141	M	11	145	35	145	2591	16.6468
1142	M	11	142	34	142	2592	16.8617
1143	M	11	145	34	145	2593	16.1712
1144	M	11	145	34	145	2593	16.1712
1145	M	11	145	34	145	2593	16.1712
1146	M	11	149	35	149	2601	15.7651
1147	M	11	149	35	149	2601	15.7651
1148	M	11	149	35	149	2601	15.7651
1149	M	11	147	34	147	2615	15.6879
1150	M	11	147	34	147	2615	15.6879
1151	M	11	162	60	162	2623.48	22.8624
1152	M	11	142	40.8	142	2640	20.2341
1153	M	11	142	40.8	142	2640	20.2341
1154	M	11	142	40.8	142	2640	20.2341
1155	M	11	143	32	143	2655.74	15.6487
1156	M	11	158	40	158	2668	16.0231
1157	M	11	158	40	158	2668	16.0231
1158	M	11	158	40	158	2668	16.0231
1159	M	11	156	45	156	2700	18.4911
1160	M	11	156	45	156	2700	18.4911
1161	M	11	156	45	156	2700	18.4911
1162	M	11	153	43	153	2711.3	18.369
1163	M	11	138	34	138	2729	17.8534
1164	M	11	138	34	138	2729	17.8534
1165	M	11	138	34	138	2729	17.8534
1166	M	11	152	42	152	2742	18.2652
1167	M	11	152	42	152	2742	18.2652
1168	M	11	142	35	142	2752	17.3577
1169	M	11	142	35	142	2752	17.3577
1170	M	11	142	35	142	2752	17.3577
1171	M	11	140	39	140	2760	19.898
1172	M	11	158	40	158	2760	16.0231
1173	M	11	140	39	140	2760	19.898
1174	M	11	158	40	158	2760	16.0231
1175	M	11	140	39	140	2760	19.898
1176	M	11	158	40	158	2760	16.0231
1177	M	11	143	33	143	2820	16.1377
1178	M	11	143	33	143	2820	16.1377
1179	M	11	143	33	143	2820	16.1377
1180	M	11	155	42	155	2860	17.4818
1181	M	11	144	40	144	2880	19.2901
1182	M	11	150	40	150	2892.86	17.7778
1183	M	11	160	51	160	2892.86	19.9219
1184	M	11	143	30	143	3000	14.6706
1185	M	11	155	35	155	3000	14.5682
1186	M	11	143	30	143	3000	14.6706
1187	M	11	155	35	155	3000	14.5682
1188	M	11	140	36	140	3042.25	18.3673

## Sheet: regressione M11
SUMMARY OUTPUT
Regression Statistics
Multiple R	0.413666
R Square	0.171119
Adjusted R Square	0.169719
Standard Error	313.883
Observations	1187
ANOVA
	df	SS	MS	F	Significance F
Regression	2	2.40821e+07	1.2041e+07	122.216	5.5878e-49
Residual	1184	1.1665e+08	98522.3
Total	1186	1.40733e+08
	Coefficients	Standard Error	t Stat	P-value	Lower 95%	Upper 95%	Lower 95,0%	Upper 95,0%
Intercept	602.39	215.463	2.79579	0.00526097	179.658	1025.12	179.658	1025.12
45	-22.0379	1.4143	-15.5822	6.14393e-50	-24.8127	-19.2631	-24.8127	-19.2631
160	15.7741	1.68152	9.38087	3.22145e-20	12.475	19.0732	12.475	19.0732

## Sheet: m12
ID	Sex	Age (years)	H (cm)	M (kg)	H (cm)	12minRT (m)	bmi
1189	M	12	143	37.5	143	1008	18.3383
1190	M	12	143	37.5	143	1008	18.3383
1191	M	12	143	37.5	143	1008	18.3383
1192	M	12	147	39.5	147	1032	18.2794
1193	M	12	152	48	152	1032	20.7756
1194	M	12	150	45	150	1080	20
1195	M	12	146	62	146	1097	29.0861
1196	M	12	154	44.4	154	1100	18.7215
1197	M	12	150	36	150	1120	16
1198	M	12	150	36	150	1120	16
1199	M	12	150	36	150	1120	16
1200	M	12	150	36	150	1120	16
1201	M	12	158	60	158	1120	24.0346
1202	M	12	150	36	150	1120	16
1203	M	12	150	36	150	1120	16
1204	M	12	150	36	150	1120	16
1205	M	12	150	36	150	1120	16
1206	M	12	158	60	158	1120	24.0346
1207	M	12	150	36	150	1120	16
1208	M	12	150	36	150	1120	16
1209	M	12	150	36	150	1120	16
1210	M	12	150	36	150	1120	16
1211	M	12	157	58	157	1128	23.5304
1212	M	12	157	58	157	1128	23.5304
1213	M	12	157	58	157	1128	23.5304
1214	M	12	164	60.3	164	1170	22.4197
1215	M	12	156	40	156	1176	16.4366
1216	M	12	153	79	153	1190	33.7477
1217	M	12	157	49	157	1200	19.8791
1218	M	12	161	51	161	1200	19.6752
1219	M	12	157	49	157	1200	19.8791
1220	M	12	161	51	161	1200	19.6752
1221	M	12	161	51	161	1200	19.6752
1222	M	12	157	49	157	1200	19.8791
1223	M	12	147	39.5	147	1200	18.2794
1224	M	12	154	48	154	1200	20.2395
1225	M	12	160	51.5	160	1224	20.1172
1226	M	12	160	51.5	160	1224	20.1172
1227	M	12	160	51.5	160	1224	20.1172
1228	M	12	156	59.7	156	1242	24.5316
1229	M	12	156	59.7	156	1242	24.5316
1230	M	12	156	59.7	156	1242	24.5316
1231	M	12	150	49	150	1248	21.7778
1232	M	12	164	55	164	1272	20.4491
1233	M	12	164	55	164	1272	20.4491
1234	M	12	164	55	164	1272	20.4491
1235	M	12	151	36.5	151	1296	16.0081
1236	M	12	163	54	163	1296	20.3244
1237	M	12	163	58	163	1300	21.83
1238	M	12	179	78	179	1300	24.3438
1239	M	12	163	58	163	1300	21.83
1240	M	12	179	78	179	1300	24.3438
1241	M	12	179	78	179	1300	24.3438
1242	M	12	155	40	155	1330	16.6909
1243	M	12	155	40	155	1330	16.6909
1244	M	12	157	46	157	1337	18.662
1245	M	12	157	46	157	1337	18.662
1246	M	12	157	46	157	1337	18.662
1247	M	12	149	58	149	1350	26.1249
1248	M	12	170	57	170	1368	19.7232
1249	M	12	170	63	170	1380	21.7993
1250	M	12	152	39	152	1392	16.8802
1251	M	12	152	39	152	1392	16.8802
1252	M	12	148	37	148	1392	16.8919
1253	M	12	152	39	152	1392	16.8802
1254	M	12	172	82	172	1400	27.7177
1255	M	12	172	82	172	1400	27.7177
1256	M	12	172	82	172	1400	27.7177
1257	M	12	172	82	172	1400	27.7177
1258	M	12	160	68	160	1400	26.5625
1259	M	12	172	82	172	1400	27.7177
1260	M	12	172	82	172	1400	27.7177
1261	M	12	160	68	160	1400	26.5625
1262	M	12	172	82	172	1400	27.7177
1263	M	12	172	82	172	1400	27.7177
1264	M	12	160	45	160	1416	17.5781
1265	M	12	165	85	165	1422	31.2213
1266	M	12	165	85	165	1422	31.2213
1267	M	12	152	49	152	1425	21.2084
1268	M	12	158.9	52.3	158.9	1427	20.7135
1269	M	12	158.9	52.3	158.9	1427	20.7135
1270	M	12	158.9	52.3	158.9	1427	20.7135
1271	M	12	145	46	145	1437	21.8787
1272	M	12	145	46	145	1437	21.8787
1273	M	12	145	46	145	1437	21.8787
1274	M	12	161	70.5	161	1438	27.198
1275	M	12	161	70.5	161	1438	27.198
1276	M	12	149	41	149	1447	18.6478
1277	M	12	149	41	149	1447	18.6478
1278	M	12	160	44.3	160	1450	17.3047
1279	M	12	160	44.3	160	1450	17.3047
1280	M	12	162	70	162	1450	26.6728
1281	M	12	150	54	150	1450	24
1282	M	12	160	54.4	160	1458	21.25
1283	M	12	160	54.4	160	1458	21.25
1284	M	12	160	54.4	160	1458	21.25
1285	M	12	158	72	158	1462	28.8415
1286	M	12	151	54	151	1470	23.6832
1287	M	12	153	50	153	1470	21.3593
1288	M	12	156	58	156	1470	23.833
1289	M	12	151	54	151	1470	23.6832
1290	M	12	153	50	153	1470	21.3593
1291	M	12	156	58	156	1470	23.833
1292	M	12	153	50	153	1470	21.3593
1293	M	12	156	58	156	1470	23.833
1294	M	12	151	54	151	1470	23.6832
1295	M	12	161	87	161	1480	33.5635
1296	M	12	157	56	157	1490	22.719
1297	M	12	153	68.3	153	1500	29.1768
1298	M	12	168	48	168	1500	17.0068
1299	M	12	153	40	153	1510	17.0874
1300	M	12	153	40	153	1510	17.0874
1301	M	12	145	33	145	1512	15.6956
1302	M	12	157	69	157	1514	27.993
1303	M	12	157	69	157	1514	27.993
1304	M	12	153.5	36	153.5	1530	15.2787
1305	M	12	153.5	36	153.5	1530	15.2787
1306	M	12	144	29.6	144	1538	14.2747
1307	M	12	144	29.6	144	1538	14.2747
1308	M	12	148	39	148	1544	17.805
1309	M	12	148	39	148	1544	17.805
1310	M	12	164	47	164	1545	17.4747
1311	M	12	164	47	164	1545	17.4747
1312	M	12	162	67.3	162	1545	25.644
1313	M	12	164	47	164	1545	17.4747
1314	M	12	155	60	155	1560	24.974
1315	M	12	166	65	166	1562	23.5883
1316	M	12	166	65	166	1562	23.5883
1317	M	12	166	65	166	1562	23.5883
1318	M	12	150	49	150	1570	21.7778
1319	M	12	170.5	81	170.5	1570	27.8635
1320	M	12	150	49	150	1570	21.7778
1321	M	12	150	49	150	1570	21.7778
1322	M	12	170.5	81	170.5	1570	27.8635
1323	M	12	147	38.2	147	1575	17.6778
1324	M	12	147	38.2	147	1575	17.6778
1325	M	12	147	38.2	147	1575	17.6778
1326	M	12	166	68.7	166	1581	24.931
1327	M	12	166	68.7	166	1581	24.931
1328	M	12	166	68.7	166	1581	24.931
1329	M	12	139	31	139	1600	16.0447
1330	M	12	157	42.7	157	1600	17.3232
1331	M	12	163	66	163	1600	24.841
1332	M	12	139	31	139	1600	16.0447
1333	M	12	157	42.7	157	1600	17.3232
1334	M	12	163	66	163	1600	24.841
1335	M	12	163	66	163	1600	24.841
1336	M	12	139	31	139	1600	16.0447
1337	M	12	157	42.7	157	1600	17.3232
1338	M	12	156.5	52	156.5	1601	21.2312
1339	M	12	158	53.5	158	1602	21.4309
1340	M	12	167	74	167	1604	26.5338
1341	M	12	155	45	155	1608	18.7305
1342	M	12	155	45	155	1608	18.7305
1343	M	12	153	41	153	1616	17.5146
1344	M	12	153	41	153	1616	17.5146
1345	M	12	167	68	167	1619	24.3824
1346	M	12	167	68	167	1619	24.3824
1347	M	12	167	68	167	1619	24.3824
1348	M	12	149	50.7	149	1620	22.8368
1349	M	12	149	50.7	149	1620	22.8368
1350	M	12	149	50.7	149	1620	22.8368
1351	M	12	146	45.8	146	1635	21.4862
1352	M	12	146	45.8	146	1635	21.4862
1353	M	12	146	45.8	146	1635	21.4862
1354	M	12	140	35	140	1640	17.8571
1355	M	12	140	35	140	1640	17.8571
1356	M	12	173	70.4	173	1640	23.5223
1357	M	12	173	70.4	173	1640	23.5223
1358	M	12	140	35	140	1640	17.8571
1359	M	12	148	48	148	1645	21.9138
1360	M	12	148	48	148	1645	21.9138
1361	M	12	148	48	148	1645	21.9138
1362	M	12	154.5	50	154.5	1650	20.9466
1363	M	12	156	52	156	1650	21.3675
1364	M	12	163	49	163	1650	18.4425
1365	M	12	154.5	50	154.5	1650	20.9466
1366	M	12	156	52	156	1650	21.3675
1367	M	12	163	49	163	1650	18.4425
1368	M	12	163	49	163	1650	18.4425
1369	M	12	154.5	50	154.5	1650	20.9466
1370	M	12	164	90	164	1650	33.4622
1371	M	12	156	52	156	1650	21.3675
1372	M	12	144	35.5	144	1652	17.12
1373	M	12	144	35.5	144	1652	17.12
1374	M	12	144	35.5	144	1652	17.12
1375	M	12	141	49	141	1653	24.6466
1376	M	12	141	49	141	1653	24.6466
1377	M	12	141	49	141	1653	24.6466
1378	M	12	167	59.5	167	1655	21.3346
1379	M	12	151	46	151	1668	20.1746
1380	M	12	151	46	151	1668	20.1746
1381	M	12	151	46	151	1668	20.1746
1382	M	12	149	37	149	1675	16.6659
1383	M	12	149	37	149	1675	16.6659
1384	M	12	149	37	149	1675	16.6659
1385	M	12	166	63	166	1680	22.9351
1386	M	12	148	43	148	1680	19.6311
1387	M	12	153	59	153	1680	25.204
1388	M	12	163	56	163	1680	21.0772
1389	M	12	166	63	166	1680	22.9351
1390	M	12	148	43	148	1680	19.6311
1391	M	12	153	59	153	1680	25.204
1392	M	12	163	56	163	1680	21.0772
1393	M	12	152	54	152	1680	23.3726
1394	M	12	163	56	163	1680	21.0772
1395	M	12	153	59	153	1680	25.204
1396	M	12	154	40.3	154	1683	16.9927
1397	M	12	154	40.3	154	1683	16.9927
1398	M	12	154	40.3	154	1683	16.9927
1399	M	12	163	61	163	1683	22.9591
1400	M	12	146	38	146	1683.12	17.827
1401	M	12	149	57.8	149	1689	26.0349
1402	M	12	153	48	153	1690	20.5049
1403	M	12	154	53	154	1690	22.3478
1404	M	12	153	48	153	1690	20.5049
1405	M	12	154	53	154	1690	22.3478
1406	M	12	146	37	146	1690	17.3579
1407	M	12	154	53	154	1690	22.3478
1408	M	12	150	40	150	1694	17.7778
1409	M	12	150	40	150	1694	17.7778
1410	M	12	150	40	150	1694	17.7778
1411	M	12	168	50	168	1700	17.7154
1412	M	12	158	65	158	1700	26.0375
1413	M	12	168	50	168	1700	17.7154
1414	M	12	158	65	158	1700	26.0375
1415	M	12	154.5	47	154.5	1701	19.6898
1416	M	12	154.5	47	154.5	1701	19.6898
1417	M	12	154.5	47	154.5	1701	19.6898
1418	M	12	162.5	52	162.5	1710	19.6923
1419	M	12	153	43	153	1718	18.369
1420	M	12	153	43	153	1718	18.369
1421	M	12	153	43	153	1718	18.369
1422	M	12	159	54	159	1720	21.3599
1423	M	12	159	54	159	1720	21.3599
1424	M	12	159	54	159	1720	21.3599
1425	M	12	160	63	160	1728	24.6094
1426	M	12	160	63	160	1728	24.6094
1427	M	12	160	63	160	1728	24.6094
1428	M	12	177	84	177	1732	26.6845
1429	M	12	177	84	177	1732	26.6845
1430	M	12	151	40	151	1733	17.5431
1431	M	12	151	40	151	1733	17.5431
1432	M	12	151	40	151	1733	17.5431
1433	M	12	157	45	157	1734	18.2563
1434	M	12	157	45	157	1734	18.2563
1435	M	12	157	45	157	1734	18.2563
1436	M	12	157	39	157	1738	15.8221
1437	M	12	156	36.1	156	1739	14.834
1438	M	12	156	36.1	156	1739	14.834
1439	M	12	151	35	151	1740	15.1748
1440	M	12	151	35	151	1740	15.1748
1441	M	12	150	37	150	1740	16.4444
1442	M	12	164	56	164	1741.94	20.8209
1443	M	12	155	53	155	1745	22.0604
1444	M	12	148	39.45	148	1750	18.0104
1445	M	12	148	39.45	148	1750	18.0104
1446	M	12	146	51	146	1750	23.9257
1447	M	12	156	46	156	1750	18.902
1448	M	12	156	46	156	1750	18.902
1449	M	12	156	46	156	1750	18.902
1450	M	12	156	46	156	1750	18.902
1451	M	12	163	46	163	1750	17.3134
1452	M	12	164	51	164	1750	18.9619
1453	M	12	158	71	158	1750	28.441
1454	M	12	158	71	158	1750	28.441
1455	M	12	158	71	158	1750	28.441
1456	M	12	158	71	158	1750	28.441
1457	M	12	148	39.45	148	1750	18.0104
1458	M	12	148	39.45	148	1750	18.0104
1459	M	12	146	51	146	1750	23.9257
1460	M	12	156	46	156	1750	18.902
1461	M	12	156	46	156	1750	18.902
1462	M	12	156	46	156	1750	18.902
1463	M	12	156	46	156	1750	18.902
1464	M	12	163	46	163	1750	17.3134
1465	M	12	164	51	164	1750	18.9619
1466	M	12	146	51	146	1750	23.9257
1467	M	12	148	39.45	148	1750	18.0104
1468	M	12	148	39.45	148	1750	18.0104
1469	M	12	156	46	156	1750	18.902
1470	M	12	158	71	158	1750	28.441
1471	M	12	156	46	156	1750	18.902
1472	M	12	158	71	158	1750	28.441
1473	M	12	164	51	164	1750	18.9619
1474	M	12	156	46	156	1750	18.902
1475	M	12	158	71	158	1750	28.441
1476	M	12	163	46	163	1750	17.3134
1477	M	12	156	46	156	1750	18.902
1478	M	12	158	71	158	1750	28.441
1479	M	12	164	65	164	1750	24.1672
1480	M	12	158	40	158	1760	16.0231
1481	M	12	151	78	151	1760.87	34.209
1482	M	12	159	53	159	1770	20.9644
1483	M	12	147	30.8	147	1770	14.2533
1484	M	12	159	53	159	1770	20.9644
1485	M	12	156	62	156	1770	25.4767
1486	M	12	147	30.8	147	1770	14.2533
1487	M	12	159	53	159	1770	20.9644
1488	M	12	145	40	145	1773	19.025
1489	M	12	145	40	145	1773	19.025
1490	M	12	145	40	145	1773	19.025
1491	M	12	158	55	158	1775	22.0317
1492	M	12	158	55	158	1775	22.0317
1493	M	12	158	55	158	1775	22.0317
1494	M	12	155	72	155	1775.34	29.9688
1495	M	12	166	60	166	1777	21.7738
1496	M	12	166	60	166	1777	21.7738
1497	M	12	166	60	166	1777	21.7738
1498	M	12	149	35	149	1780	15.7651
1499	M	12	149	35	149	1780	15.7651
1500	M	12	149	35	149	1780	15.7651
1501	M	12	149	35	149	1780	15.7651
1502	M	12	153	53	153	1780	22.6409
1503	M	12	153	53	153	1780	22.6409
1504	M	12	153	53	153	1780	22.6409
1505	M	12	153	53	153	1780	22.6409
1506	M	12	149	35	149	1780	15.7651
1507	M	12	149	35	149	1780	15.7651
1508	M	12	149	35	149	1780	15.7651
1509	M	12	149	35	149	1780	15.7651
1510	M	12	153	53	153	1780	22.6409
1511	M	12	153	53	153	1780	22.6409
1512	M	12	153	53	153	1780	22.6409
1513	M	12	153	53	153	1780	22.6409
1514	M	12	153	53	153	1780	22.6409
1515	M	12	149	35	149	1780	15.7651
1516	M	12	153	53	153	1780	22.6409
1517	M	12	149	35	149	1780	15.7651
1518	M	12	153	53	153	1780	22.6409
1519	M	12	149	35	149	1780	15.7651
1520	M	12	153	53	153	1780	22.6409
1521	M	12	149	35	149	1780	15.7651
1522	M	12	150	36.8	150	1782	16.3556
1523	M	12	140	41	140	1782	20.9184
1524	M	12	166	59	166	1782	21.4109
1525	M	12	150	36.8	150	1782	16.3556
1526	M	12	140	41	140	1782	20.9184
1527	M	12	166	59	166	1782	21.4109
1528	M	12	140	41	140	1782	20.9184
1529	M	12	166	59	166	1782	21.4109
1530	M	12	150	36.8	150	1782	16.3556
1531	M	12	147	36	147	1785	16.6597
1532	M	12	147	36	147	1785	16.6597
1533	M	12	152	43	152	1788	18.6115
1534	M	12	152	43	152	1788	18.6115
1535	M	12	152	43	152	1788	18.6115
1536	M	12	161	61.3	161	1790	23.6488
1537	M	12	155	42	155	1790.06	17.4818
1538	M	12	146	65	146	1790.06	30.4935
1539	M	12	166	57.6	166	1797	20.9029
1540	M	12	166	57.6	166	1797	20.9029
1541	M	12	166	57.6	166	1797	20.9029
1542	M	12	154	40	154	1800	16.8663
1543	M	12	147	54	147	1800	24.9896
1544	M	12	157	44	157	1800	17.8506
1545	M	12	169	65	169	1800	22.7583
1546	M	12	147	34	147	1800	15.7342
1547	M	12	147	34	147	1800	15.7342
1548	M	12	147	34	147	1800	15.7342
1549	M	12	147	34	147	1800	15.7342
1550	M	12	150	42.1	150	1800	18.7111
1551	M	12	150	55	150	1800	24.4444
1552	M	12	158	60	158	1800	24.0346
1553	M	12	164	44	164	1800	16.3593
1554	M	12	154	40	154	1800	16.8663
1555	M	12	147	54	147	1800	24.9896
1556	M	12	157	44	157	1800	17.8506
1557	M	12	169	65	169	1800	22.7583
1558	M	12	147	34	147	1800	15.7342
1559	M	12	147	34	147	1800	15.7342
1560	M	12	147	34	147	1800	15.7342
1561	M	12	147	34	147	1800	15.7342
1562	M	12	150	42.1	150	1800	18.7111
1563	M	12	150	55	150	1800	24.4444
1564	M	12	158	60	158	1800	24.0346
1565	M	12	164	44	164	1800	16.3593
1566	M	12	162	45	162	1800	17.1468
1567	M	12	147	34	147	1800	15.7342
1568	M	12	147	34	147	1800	15.7342
1569	M	12	150	55	150	1800	24.4444
1570	M	12	147	34	147	1800	15.7342
1571	M	12	147	34	147	1800	15.7342
1572	M	12	150	42.1	150	1800	18.7111
1573	M	12	164	44	164	1800	16.3593
1574	M	12	158	60	158	1800	24.0346
1575	M	12	149	39.7	149	1809	17.8821
1576	M	12	149	39.7	149	1809	17.8821
1577	M	12	149	39.7	149	1809	17.8821
1578	M	12	146	46	146	1810	21.7208
1579	M	12	146	46	146	1810	21.7208
1580	M	12	155	64	155	1812	26.6389
1581	M	12	158	45	158	1815.13	18.026
1582	M	12	150	39	150	1820	17.3333
1583	M	12	156	44	156	1820	18.0802
1584	M	12	158	49	158	1820	19.6283
1585	M	12	158	49	158	1820	19.6283
1586	M	12	158	49	158	1820	19.6283
1587	M	12	158	49	158	1820	19.6283
1588	M	12	150	39	150	1820	17.3333
1589	M	12	156	44	156	1820	18.0802
1590	M	12	158	49	158	1820	19.6283
1591	M	12	158	49	158	1820	19.6283
1592	M	12	158	49	158	1820	19.6283
1593	M	12	158	49	158	1820	19.6283
1594	M	12	158	49	158	1820	19.6283
1595	M	12	158	49	158	1820	19.6283
1596	M	12	158	49	158	1820	19.6283
1597	M	12	156	44	156	1820	18.0802
1598	M	12	158	49	158	1820	19.6283
1599	M	12	165	84	165	1820	30.854
1600	M	12	148	40	148	1824	18.2615
1601	M	12	148	40	148	1824	18.2615
1602	M	12	153	55	153	1825	23.4952
1603	M	12	165	60	165	1828	22.0386
1604	M	12	165	60	165	1828	22.0386
1605	M	12	165	60	165	1828	22.0386
1606	M	12	147	45.5	147	1836	21.056
1607	M	12	147	45.5	147	1836	21.056
1608	M	12	147	45.5	147	1836	21.056
1609	M	12	153	54.3	153	1836	23.1962
1610	M	12	155	62.4	155	1837	25.9729
1611	M	12	150	50	150	1850	22.2444
1612	M	12	155	56	155	1850	23.2258
1613	M	12	165	43	165	1850	15.7943
1614	M	12	150	50	150	1850	22.2444
1615	M	12	155	56	155	1850	23.2258
1616	M	12	165	43	165	1850	15.7943
1617	M	12	165	43	165	1850	15.7943
1618	M	12	153	37	153	1850	15.8059
1619	M	12	156	59	156	1860	24.2439
1620	M	12	155	46	155	1862.07	19.1467
1621	M	12	156	48.6	156	1863	19.9704
1622	M	12	156	48.6	156	1863	19.9704
1623	M	12	158.5	59	158.5	1863	23.4852
1624	M	12	153	58.5	153	1863	24.9904
1625	M	12	156	48.6	156	1863	19.9704
1626	M	12	143	27	143	1864	13.2036
1627	M	12	160	40	160	1867.44	15.625
1628	M	12	147	56.3	147	1870	26.054
1629	M	12	162	72.65	162	1870	27.6825
1630	M	12	162	72.65	162	1870	27.6825
1631	M	12	147	56.3	147	1870	26.054
1632	M	12	156	52	156	1872.83	21.3675
1633	M	12	163	45	163	1875	16.937
1634	M	12	163	45	163	1875	16.937
1635	M	12	163	45	163	1875	16.937
1636	M	12	147	35	147	1877	16.197
1637	M	12	147	35	147	1877	16.197
1638	M	12	147	35	147	1877	16.197
1639	M	12	159	58	159	1885	22.9421
1640	M	12	159	55	159	1885	21.7555
1641	M	12	159	58	159	1885	22.9421
1642	M	12	159	55	159	1885	21.7555
1643	M	12	159	55	159	1885	21.7555
1644	M	12	159	58	159	1885	22.9421
1645	M	12	156	42.4	156	1890	17.4227
1646	M	12	140	41	140	1890	20.9184
1647	M	12	150	44	150	1890	19.5556
1648	M	12	161	52	161	1890	20.061
1649	M	12	156	42.4	156	1890	17.4227
1650	M	12	140	41	140	1890	20.9184
1651	M	12	150	44	150	1890	19.5556
1652	M	12	161	52	161	1890	20.061
1653	M	12	161	52	161	1890	20.061
1654	M	12	150	44	150	1890	19.5556
1655	M	12	156	42.4	156	1890	17.4227
1656	M	12	157	55	157	1891	22.3133
1657	M	12	157	55	157	1891	22.3133
1658	M	12	157	55	157	1891	22.3133
1659	M	12	175	66	175	1895	21.551
1660	M	12	175	66	175	1895	21.551
1661	M	12	175	66	175	1895	21.551
1662	M	12	153	64	153	1896	27.3399
1663	M	12	163	66	163	1900	24.841
1664	M	12	140	32	140	1900	16.3265
1665	M	12	140	32	140	1900	16.3265
1666	M	12	140	32	140	1900	16.3265
1667	M	12	140	32	140	1900	16.3265
1668	M	12	153	39	153	1900	16.6603
1669	M	12	156	46	156	1900	18.902
1670	M	12	163	62.5	163	1900	23.5237
1671	M	12	163	46.3	163	1900	17.4263
1672	M	12	163	66	163	1900	24.841
1673	M	12	140	32	140	1900	16.3265
1674	M	12	140	32	140	1900	16.3265
1675	M	12	140	32	140	1900	16.3265
1676	M	12	140	32	140	1900	16.3265
1677	M	12	153	39	153	1900	16.6603
1678	M	12	156	46	156	1900	18.902
1679	M	12	163	62.5	163	1900	23.5237
1680	M	12	163	46.3	163	1900	17.4263
1681	M	12	142	41	142	1900	20.3333
1682	M	12	163	62.5	163	1900	23.5237
1683	M	12	140	32	140	1900	16.3265
1684	M	12	140	32	140	1900	16.3265
1685	M	12	140	32	140	1900	16.3265
1686	M	12	140	32	140	1900	16.3265
1687	M	12	163	46.3	163	1900	17.4263
1688	M	12	153	39	153	1900	16.6603
1689	M	12	165	58	165	1906	21.3039
1690	M	12	164	55	164	1906	20.4491
1691	M	12	165	58	165	1906	21.3039
1692	M	12	164	55	164	1906	20.4491
1693	M	12	165	58	165	1906	21.3039
1694	M	12	164	55	164	1906	20.4491
1695	M	12	168	63.6	168	1910	22.534
1696	M	12	168	63.6	168	1910	22.534
1697	M	12	161	65	161	1910	25.0762
1698	M	12	168	63.6	168	1910	22.534
1699	M	12	163	74	163	1911	27.852
1700	M	12	163	74	163	1911	27.852
1701	M	12	150	51	150	1914	22.6667
1702	M	12	150	51	150	1914	22.6667
1703	M	12	163	52.8	163	1916	19.8728
1704	M	12	163	52.8	163	1916	19.8728
1705	M	12	163	52.8	163	1916	19.8728
1706	M	12	157	49	157	1920	19.7168
1707	M	12	159	50	159	1920	19.5799
1708	M	12	158	55	158	1920	22.0317
1709	M	12	178	62	178	1920	19.5051
1710	M	12	151	41	151	1920	17.9817
1711	M	12	160	37	160	1920	14.4531
1712	M	12	157	49	157	1920	19.7168
1713	M	12	159	50	159	1920	19.5799
1714	M	12	158	55	158	1920	22.0317
1715	M	12	178	62	178	1920	19.5051
1716	M	12	151	41	151	1920	17.9817
1717	M	12	163	44	163	1922.85	16.5607
1718	M	12	172	57	172	1922.85	19.2672
1719	M	12	164	63	164	1922.85	23.4236
1720	M	12	160	52	160	1925	20.3125
1721	M	12	160	52	160	1925	20.3125
1722	M	12	160	52	160	1925	20.3125
1723	M	12	155	38	155	1926	15.8169
1724	M	12	155	38	155	1926	15.8169
1725	M	12	142	44	142	1928.57	21.8211
1726	M	12	160	48	160	1929	18.75
1727	M	12	160	48	160	1929	18.75
1728	M	12	158	40	158	1933	16.0231
1729	M	12	158	40	158	1933	16.0231
1730	M	12	166	55	166	1940	19.9594
1731	M	12	166	55	166	1940	19.9594
1732	M	12	152	65	152	1942	28.1337
1733	M	12	152	65	152	1942	28.1337
1734	M	12	154	45.1	154	1944	19.0167
1735	M	12	160	52.5	160	1944	20.5078
1736	M	12	148	33.5	148	1944	15.294
1737	M	12	154	45.1	154	1944	19.0167
1738	M	12	160	52.5	160	1944	20.5078
1739	M	12	154	45.1	154	1944	19.0167
1740	M	12	148	33.5	148	1944	15.294
1741	M	12	160	52.5	160	1944	20.5078
1742	M	12	145	40	145	1946	19.025
1743	M	12	145	41	145	1949	19.5006
1744	M	12	145	41	145	1949	19.5006
1745	M	12	145	41	145	1949	19.5006
1746	M	12	158	64	158	1950	25.6369
1747	M	12	140	34	140	1950	17.3469
1748	M	12	147	44	147	1950	20.3619
1749	M	12	159	46	159	1950	18.1955
1750	M	12	141	30	141	1950	15.0898
1751	M	12	158	64	158	1950	25.6369
1752	M	12	140	34	140	1950	17.3469
1753	M	12	147	44	147	1950	20.3619
1754	M	12	159	46	159	1950	18.1955
1755	M	12	147	44	147	1950	20.3619
1756	M	12	159	46	159	1950	18.1955
1757	M	12	141	30	141	1950	15.0898
1758	M	12	154	48	154	1951.81	20.2395
1759	M	12	154	40	154	1952	16.8663
1760	M	12	154	40	154	1952	16.8663
1761	M	12	150	32.3	150	1954	14.3556
1762	M	12	150	32.3	150	1954	14.3556
1763	M	12	158	49	158	1955	19.6283
1764	M	12	160	50	160	1955	19.5312
1765	M	12	158	49	158	1955	19.6283
1766	M	12	160	50	160	1955	19.5312
1767	M	12	160	48	160	1956	18.75
1768	M	12	160	48	160	1956	18.75
1769	M	12	160	48	160	1956	18.75
1770	M	12	149	39	149	1960	17.5668
1771	M	12	147	27	147	1960	12.4948
1772	M	12	149	39	149	1960	17.5668
1773	M	12	149	39	149	1960	17.5668
1774	M	12	158	59	158	1970	23.5539
1775	M	12	158	59	158	1970	23.5539
1776	M	12	179	61	179	1975.61	19.0381
1777	M	12	148	35	148	1976	15.9788
1778	M	12	167	63	167	1978	22.5896
1779	M	12	167	63	167	1978	22.5896
1780	M	12	167	63	167	1978	22.5896
1781	M	12	145	37	145	1979	17.5981
1782	M	12	145	37	145	1979	17.5981
1783	M	12	145	37	145	1979	17.5981
1784	M	12	152	35	152	1980	15.1489
1785	M	12	152	35	152	1980	15.1489
1786	M	12	153	46	153	1981.65	19.6506
1787	M	12	170	68	170	1981.65	23.5294
1788	M	12	157	47	157	1983	19.0677
1789	M	12	157	47	157	1983	19.0677
1790	M	12	157	53	157	1986	21.299
1791	M	12	157	53	157	1986	21.299
1792	M	12	160	45	160	1987.73	17.5781
1793	M	12	140	36	140	1987.73	18.3673
1794	M	12	145.5	42.2	145.5	1989	19.9336
1795	M	12	155	52.2	155	1989	21.7274
1796	M	12	145.5	42.2	145.5	1989	19.9336
1797	M	12	155	52.2	155	1989	21.7274
1798	M	12	155	52.2	155	1989	21.7274
1799	M	12	145.5	42.2	145.5	1989	19.9336
1800	M	12	150	44.9	150	1998	19.9556
1801	M	12	152	51.1	152	1998	22.1174
1802	M	12	155	37.3	155	1998	15.5255
1803	M	12	150	44.9	150	1998	19.9556
1804	M	12	152	51.1	152	1998	22.1174
1805	M	12	150	53	150	1998	23.5556
1806	M	12	153	35.4	153	1998	15.1224
1807	M	12	155	37.3	155	1998	15.5255
1808	M	12	150	44.9	150	1998	19.9556
1809	M	12	152	51.1	152	1998	22.1174
1810	M	12	138	30	138	2000	15.858
1811	M	12	136	33	136	2000	17.8417
1812	M	12	156	55	156	2000	22.6003
1813	M	12	172	78	172	2000	26.3656
1814	M	12	150	45.7	150	2000	20.3111
1815	M	12	151	41	151	2000	17.9817
1816	M	12	153	55	153	2000	23.4952
1817	M	12	156	42	156	2000	17.2584
1818	M	12	161	51	161	2000	19.6752
1819	M	12	168	45	168	2000	15.9439
1820	M	12	138	30	138	2000	15.858
1821	M	12	136	33	136	2000	17.8417
1822	M	12	156	55	156	2000	22.6003
1823	M	12	172	78	172	2000	26.3656
1824	M	12	150	45.7	150	2000	20.3111
1825	M	12	151	41	151	2000	17.9817
1826	M	12	153	55	153	2000	23.4952
1827	M	12	156	42	156	2000	17.2584
1828	M	12	161	51	161	2000	19.6752
1829	M	12	168	45	168	2000	15.9439
1830	M	12	153	55	153	2000	23.4952
1831	M	12	150	45.7	150	2000	20.3111
1832	M	12	151	41	151	2000	17.9817
1833	M	12	161	51	161	2000	19.6752
1834	M	12	156	42	156	2000	17.2584
1835	M	12	168	45	168	2000	15.9439
1836	M	12	157	37	157	2003	15.0108
1837	M	12	157	37	157	2003	15.0108
1838	M	12	150	36	150	2004	16
1839	M	12	147	41	147	2005	18.9736
1840	M	12	147	41	147	2005	18.9736
1841	M	12	147	41	147	2005	18.9736
1842	M	12	154	56.6	154	2007	23.8657
1843	M	12	154	56.6	154	2007	23.8657
1844	M	12	154	56.6	154	2007	23.8657
1845	M	12	154	38	154	2010	16.0229
1846	M	12	165	59	165	2010	21.6713
1847	M	12	162	37	162	2010	14.0985
1848	M	12	154	38	154	2010	16.0229
1849	M	12	165	59	165	2010	21.6713
1850	M	12	165	59	165	2010	21.6713
1851	M	12	162	37	162	2010	14.0985
1852	M	12	145	31	145	2012.42	14.7444
1853	M	12	160	52	160	2015	20.3125
1854	M	12	160	52	160	2015	20.3125
1855	M	12	160	52	160	2015	20.3125
1856	M	12	149	41	149	2018.69	18.4676
1857	M	12	149	48	149	2018.69	21.6206
1858	M	12	147	37	147	2020	17.1225
1859	M	12	147	37	147	2020	17.1225
1860	M	12	156	45.7	156	2022	18.7788
1861	M	12	178	42.5	178	2022	13.4137
1862	M	12	156	45.7	156	2022	18.7788
1863	M	12	178	42.5	178	2022	13.4137
1864	M	12	156	45.7	156	2022	18.7788
1865	M	12	155	50.2	155	2025	20.8949
1866	M	12	155	50.2	155	2025	20.8949
1867	M	12	155	50.2	155	2025	20.8949
1868	M	12	154	35	154	2028	14.758
1869	M	12	154	35	154	2028	14.758
1870	M	12	154	37.9	154	2030	15.9808
1871	M	12	154	37.9	154	2030	15.9808
1872	M	12	157	39	157	2030	15.8221
1873	M	12	156	37	156	2030	15.2038
1874	M	12	161	39	161	2030	15.0457
1875	M	12	154	37.9	154	2030	15.9808
1876	M	12	154	37.9	154	2030	15.9808
1877	M	12	157	39	157	2030	15.8221
1878	M	12	154	37.9	154	2030	15.9808
1879	M	12	154	37.9	154	2030	15.9808
1880	M	12	161	39	161	2030	15.0457
1881	M	12	156	37	156	2030	15.2038
1882	M	12	144	37	144	2030	17.8434
1883	M	12	168	56	168	2034	19.8413
1884	M	12	168	56	168	2034	19.8413
1885	M	12	140	50	140	2035	25.5102
1886	M	12	140	50	140	2035	25.5102
1887	M	12	160	53	160	2036	20.7031
1888	M	12	156	49	156	2036	20.1348
1889	M	12	160	53	160	2036	20.7031
1890	M	12	156	49	156	2036	20.1348
1891	M	12	160	53	160	2036	20.7031
1892	M	12	156	49	156	2036	20.1348
1893	M	12	159	59	159	2040	23.2981
1894	M	12	163	51.7	163	2040	19.4588
1895	M	12	170	38.7	170	2040	13.391
1896	M	12	159	59	159	2040	23.2981
1897	M	12	163	51.7	163	2040	19.4588
1898	M	12	170	38.7	170	2040	13.391
1899	M	12	163	51.7	163	2040	19.4588
1900	M	12	145	35	145	2050	16.409
1901	M	12	142	35	142	2050	17.5064
1902	M	12	154	47	154	2050	19.86
1903	M	12	145	35	145	2050	16.409
1904	M	12	142	35	142	2050	17.5064
1905	M	12	154	47	154	2050	19.86
1906	M	12	146	39.4	146	2052	18.4838
1907	M	12	146	39.4	146	2052	18.4838
1908	M	12	146	39.4	146	2052	18.4838
1909	M	12	168	50	168	2057.14	17.7154
1910	M	12	151	53	151	2060	23.2446
1911	M	12	151	53	151	2060	23.2446
1912	M	12	151	53	151	2060	23.2446
1913	M	12	171	52.9	171	2062	18.091
1914	M	12	171	52.9	171	2062	18.091
1915	M	12	171	52.9	171	2062	18.091
1916	M	12	146	40	146	2070	18.7652
1917	M	12	153	44	153	2070	18.7962
1918	M	12	161	71.65	161	2070	27.6417
1919	M	12	161	71.65	161	2070	27.6417
1920	M	12	146	40	146	2070	18.7652
1921	M	12	153	44	153	2070	18.7962
1922	M	12	161	71.65	161	2070	27.6417
1923	M	12	161	71.65	161	2070	27.6417
1924	M	12	161	42	161	2070	16.2031
1925	M	12	150	41.6	150	2073	18.4889
1926	M	12	150	41.6	150	2073	18.4889
1927	M	12	150	41.6	150	2073	18.4889
1928	M	12	141	37	141	2075	18.6107
1929	M	12	147	42	147	2075	19.4363
1930	M	12	141	37	141	2075	18.6107
1931	M	12	147	42	147	2075	19.4363
1932	M	12	141	37	141	2075	18.6107
1933	M	12	147	42	147	2075	19.4363
1934	M	12	148	43	148	2076.92	19.6311
1935	M	12	157	51	157	2076.92	20.6905
1936	M	12	166	60	166	2076.92	21.7738
1937	M	12	159.5	46.8	159.5	2079	18.396
1938	M	12	159.5	46.8	159.5	2079	18.396
1939	M	12	159.5	46.8	159.5	2079	18.396
1940	M	12	154	48	154	2080	20.2395
1941	M	12	154	48	154	2080	20.2395
1942	M	12	152	44	152	2080	19.0443
1943	M	12	152	39	152	2083.6	16.8802
1944	M	12	149	47	149	2084	21.1702
1945	M	12	149	47	149	2084	21.1702
1946	M	12	149	47	149	2084	21.1702
1947	M	12	157	50	157	2086	20.2848
1948	M	12	145	34	145	2090.32	16.1712
1949	M	12	153	41	153	2097	17.5146
1950	M	12	153	41	153	2097	17.5146
1951	M	12	153	41	153	2097	17.5146
1952	M	12	170	53.5	170	2097.09	18.5121
1953	M	12	148	36.45	148	2100	16.6408
1954	M	12	148	36.45	148	2100	16.6408
1955	M	12	140	35	140	2100	17.8571
1956	M	12	142	35	142	2100	17.3577
1957	M	12	145	36	145	2100	17.1225
1958	M	12	176	79.5	176	2100	25.665
1959	M	12	148	36.45	148	2100	16.6408
1960	M	12	148	36.45	148	2100	16.6408
1961	M	12	140	35	140	2100	17.8571
1962	M	12	142	35	142	2100	17.3577
1963	M	12	145	36	145	2100	17.1225
1964	M	12	176	79.5	176	2100	25.665
1965	M	12	140	35	140	2100	17.8571
1966	M	12	148	36.45	148	2100	16.6408
1967	M	12	148	36.45	148	2100	16.6408
1968	M	12	145	36	145	2100	17.1225
1969	M	12	176	79.5	176	2100	25.665
1970	M	12	142	35	142	2100	17.3577
1971	M	12	148	42	148	2100	19.1746
1972	M	12	146	36	146	2100	16.8887
1973	M	12	154	54	154	2104	22.7694
1974	M	12	154	54	154	2104	22.7694
1975	M	12	153	47.6	153	2106	20.3341
1976	M	12	174	73	174	2106	24.1115
1977	M	12	157	72	157	2106	29.2101
1978	M	12	153	47.6	153	2106	20.3341
1979	M	12	174	73	174	2106	24.1115
1980	M	12	157	72	157	2106	29.2101
1981	M	12	174	73	174	2106	24.1115
1982	M	12	150	50	150	2106	22.2222
1983	M	12	153	47.6	153	2106	20.3341
1984	M	12	174	57	174	2107	18.8268
1985	M	12	174	57	174	2107	18.8268
1986	M	12	174	57	174	2107	18.8268
1987	M	12	159	49.9	159	2108	19.7381
1988	M	12	159	49.9	159	2108	19.7381
1989	M	12	159	49.9	159	2108	19.7381
1990	M	12	157.5	52.8	157.5	2109	21.285
1991	M	12	157.5	52.8	157.5	2109	21.285
1992	M	12	157.5	52.8	157.5	2109	21.285
1993	M	12	158	48	158	2110	19.2277
1994	M	12	158	48	158	2110	19.2277
1995	M	12	158	48	158	2110	19.2277
1996	M	12	158	40	158	2110.75	16.0231
1997	M	12	169	58	169	2114	20.3074
1998	M	12	169	58	169	2114	20.3074
1999	M	12	169	58	169	2114	20.3074
2000	M	12	157	44	157	2115	17.8506
2001	M	12	157	44	157	2115	17.8506
2002	M	12	157	44	157	2115	17.8506
2003	M	12	164	44	164	2117	16.3593
2004	M	12	164	44	164	2117	16.3593
2005	M	12	164	44	164	2117	16.3593
2006	M	12	160	42	160	2117.65	16.4062
2007	M	12	165	50.05	165	2120	18.3838
2008	M	12	142	35.2	142	2120	17.4569
2009	M	12	150	39	150	2120	17.3333
2010	M	12	161	56	161	2120	21.6041
2011	M	12	165	50.05	165	2120	18.3838
2012	M	12	142	35.2	142	2120	17.4569
2013	M	12	150	39	150	2120	17.3333
2014	M	12	161	56	161	2120	21.6041
2015	M	12	150	39	150	2120	17.3333
2016	M	12	175	55	175	2120	17.9592
2017	M	12	165	50.05	165	2120	18.3838
2018	M	12	142	35.2	142	2120	17.4569
2019	M	12	161	56	161	2120	21.6041
2020	M	12	160	45	160	2122	17.5781
2021	M	12	160	45	160	2122	17.5781
2022	M	12	172	45.5	172	2123	15.3799
2023	M	12	172	45.5	172	2123	15.3799
2024	M	12	154	39.5	154	2124	16.6554
2025	M	12	154	39.5	154	2124	16.6554
2026	M	12	154	39.5	154	2124	16.6554
2027	M	12	165	50	165	2124.59	18.3655
2028	M	12	163	57	163	2125	21.4536
2029	M	12	143	39.5	143	2127	19.3163
2030	M	12	143	39.5	143	2127	19.3163
2031	M	12	143	39.5	143	2127	19.3163
2032	M	12	161	50	161	2130	19.2894
2033	M	12	162	64.5	162	2130	24.577
2034	M	12	161	50	161	2130	19.2894
2035	M	12	162	64.5	162	2130	24.577
2036	M	12	162	64.5	162	2130	24.577
2037	M	12	154	42	154	2133	17.7939
2038	M	12	160	58	160	2133	22.6562
2039	M	12	149	28	149	2133	12.612
2040	M	12	154	42	154	2133	17.7939
2041	M	12	160	58	160	2133	22.6562
2042	M	12	149	28	149	2133	12.612
2043	M	12	160	58	160	2133	22.6562
2044	M	12	161	58	161	2138	22.3757
2045	M	12	161	58	161	2138	22.3757
2046	M	12	154	40	154	2138.61	16.8663
2047	M	12	146	40	146	2138.61	18.7652
2048	M	12	169	54	169	2138.61	18.9069
2049	M	12	165	49	165	2139	17.9982
2050	M	12	165	49	165	2139	17.9982
2051	M	12	165	49	165	2139	17.9982
2052	M	12	154	38	154	2140	15.8964
2053	M	12	154	38	154	2140	15.8964
2054	M	12	160	55	160	2142	21.4844
2055	M	12	160	55	160	2142	21.4844
2056	M	12	160	55	160	2142	21.4844
2057	M	12	166	50	166	2143	18.1449
2058	M	12	166	50	166	2143	18.1449
2059	M	12	166	50	166	2143	18.1449
2060	M	12	145	35.5	145	2149	16.8847
2061	M	12	145	35.5	145	2149	16.8847
2062	M	12	145	35.5	145	2149	16.8847
2063	M	12	140	35	140	2150	17.7041
2064	M	12	150	43	150	2150	19.1111
2065	M	12	140	35	140	2150	17.7041
2066	M	12	150	43	150	2150	19.1111
2067	M	12	150	43	150	2150	19.1111
2068	M	12	149	28	149	2157	12.612
2069	M	12	162	46	162	2157	17.5278
2070	M	12	149	28	149	2157	12.612
2071	M	12	145	34	145	2157	16.1712
2072	M	12	152	54.5	152	2160	23.589
2073	M	12	157	43	157	2160	17.4449
2074	M	12	152	34	152	2160	14.7161
2075	M	12	152	54.5	152	2160	23.589
2076	M	12	157	43	157	2160	17.4449
2077	M	12	157	48	157	2160	19.4734
2078	M	12	146	44	146	2160	20.6418
2079	M	12	171	59	171	2160	20.1771
2080	M	12	157	43	157	2160	17.4449
2081	M	12	148	39	148	2160	17.805
2082	M	12	152	54.5	152	2160	23.589
2083	M	12	152	34	152	2160	14.7161
2084	M	12	154	47	154	2167.22	19.8178
2085	M	12	164	50.8	164	2170	18.8876
2086	M	12	164	50.8	164	2170	18.8876
2087	M	12	157	54.5	157	2170	22.1104
2088	M	12	164	50.8	164	2170	18.8876
2089	M	12	158	42	158	2170	16.8242
2090	M	12	165	54	165	2174.5	19.8347
2091	M	12	157	44	157	2175	17.8506
2092	M	12	156	45	156	2175	18.4911
2093	M	12	154	38	154	2175	16.0229
2094	M	12	157	44	157	2175	17.8506
2095	M	12	156	45	156	2175	18.4911
2096	M	12	154	38	154	2175	16.0229
2097	M	12	154	38	154	2175	16.0229
2098	M	12	160	65	160	2178	25.3906
2099	M	12	160	65	160	2178	25.3906
2100	M	12	160	65	160	2178	25.3906
2101	M	12	157	43	157	2180	17.3638
2102	M	12	143	34	143	2180	16.6267
2103	M	12	155	44	155	2180	18.3143
2104	M	12	157	43	157	2180	17.3638
2105	M	12	143	34	143	2180	16.6267
2106	M	12	155	44	155	2180	18.3143
2107	M	12	143	34	143	2180	16.6267
2108	M	12	161	60	161	2181.82	23.1473
2109	M	12	156	37	156	2185	15.2038
2110	M	12	156	37	156	2185	15.2038
2111	M	12	160	41	160	2187	16.0156
2112	M	12	160	48	160	2187	18.75
2113	M	12	160	41	160	2187	16.0156
2114	M	12	160	48	160	2187	18.75
2115	M	12	160	41	160	2187	16.0156
2116	M	12	160	48	160	2187	18.75
2117	M	12	146	34.8	146	2188	16.3258
2118	M	12	146	34.8	146	2188	16.3258
2119	M	12	146	34.8	146	2188	16.3258
2120	M	12	140	27	140	2189.19	13.7755
2121	M	12	157	41.25	157	2190	16.735
2122	M	12	155	44	155	2190	18.3143
2123	M	12	157	41.25	157	2190	16.735
2124	M	12	155	44	155	2190	18.3143
2125	M	12	157	41.25	157	2190	16.735
2126	M	12	158	49	158	2195	19.6283
2127	M	12	168	45	168	2195	15.9439
2128	M	12	158	49	158	2195	19.6283
2129	M	12	168	45	168	2195	15.9439
2130	M	12	151.5	36	151.5	2196	15.6847
2131	M	12	151.5	36	151.5	2196	15.6847
2132	M	12	151.5	36	151.5	2196	15.6847
2133	M	12	169	58.2	169	2199	20.3774
2134	M	12	159	52	159	2199	20.5688
2135	M	12	169	58.2	169	2199	20.3774
2136	M	12	159	52	159	2199	20.5688
2137	M	12	169	58.2	169	2199	20.3774
2138	M	12	159	52	159	2199	20.5688
2139	M	12	155	37	155	2200	15.4006
2140	M	12	150	39.6	150	2200	17.6
2141	M	12	165	54	165	2200	19.8347
2142	M	12	155	37	155	2200	15.4006
2143	M	12	150	39.6	150	2200	17.6
2144	M	12	165	54	165	2200	19.8347
2145	M	12	150	39.6	150	2200	17.6
2146	M	12	165	54	165	2200	19.8347
2147	M	12	138	28.5	138	2203	14.9653
2148	M	12	138	28.5	138	2203	14.9653
2149	M	12	147	34	147	2205	15.7342
2150	M	12	147	34	147	2205	15.7342
2151	M	12	148	41	148	2208	18.9007
2152	M	12	148	41	148	2208	18.9007
2153	M	12	150	37	150	2210	16.4444
2154	M	12	157	43.7	157	2210	17.7289
2155	M	12	150	37	150	2210	16.4444
2156	M	12	157	43.7	157	2210	17.7289
2157	M	12	150	37	150	2210	16.4444
2158	M	12	157	43.7	157	2210	17.7289
2159	M	12	154	51	154	2211.6	21.5045
2160	M	12	132	30	132	2214	17.2176
2161	M	12	150	45	150	2214	20
2162	M	12	166	53	166	2214	19.2336
2163	M	12	132	30	132	2214	17.2176
2164	M	12	150	45	150	2214	20
2165	M	12	166	53	166	2214	19.2336
2166	M	12	166	53	166	2214	19.2336
2167	M	12	132	30	132	2214	17.2176
2168	M	12	150	45	150	2214	20
2169	M	12	161	44.2	161	2216	17.0518
2170	M	12	161	44.2	161	2216	17.0518
2171	M	12	161	44.2	161	2216	17.0518
2172	M	12	157	46.7	157	2220	18.946
2173	M	12	157	46.7	157	2220	18.946
2174	M	12	157	46.7	157	2220	18.946
2175	M	12	158	40	158	2221	16.0231
2176	M	12	158	40	158	2221	16.0231
2177	M	12	163	67	163	2223	25.2174
2178	M	12	163	67	163	2223	25.2174
2179	M	12	163	67	163	2223	25.2174
2180	M	12	152	44	152	2226.8	19.0443
2181	M	12	156	46	156	2230	18.902
2182	M	12	156	46	156	2230	18.902
2183	M	12	157	53	157	2240	21.5019
2184	M	12	163	46	163	2240	17.3134
2185	M	12	163	54	163	2240	20.3244
2186	M	12	157	53	157	2240	21.5019
2187	M	12	163	46	163	2240	17.3134
2188	M	12	163	54	163	2240	20.3244
2189	M	12	175	56	175	2240	18.2857
2190	M	12	163	46	163	2240	17.3134
2191	M	12	163	54	163	2240	20.3244
2192	M	12	155	47	155	2240	19.563
2193	M	12	150	41	150	2240	18.2222
2194	M	12	147	41	147	2240	18.9736
2195	M	12	157	41	157	2242	16.6335
2196	M	12	157	41	157	2242	16.6335
2197	M	12	157	41	157	2242	16.6335
2198	M	12	149	38	149	2242.21	17.1163
2199	M	12	176	72	176	2242.21	23.2438
2200	M	12	155	47.9	155	2250	19.9376
2201	M	12	168	60	168	2250	21.2585
2202	M	12	155	47.9	155	2250	19.9376
2203	M	12	168	60	168	2250	21.2585
2204	M	12	177	70	177	2250	22.3435
2205	M	12	168	60	168	2250	21.2585
2206	M	12	155	47.9	155	2250	19.9376
2207	M	12	148	35.5	148	2256	16.2071
2208	M	12	148	35.5	148	2256	16.2071
2209	M	12	148	35.5	148	2256	16.2071
2210	M	12	155	41	155	2257	17.0656
2211	M	12	155	41	155	2257	17.0656
2212	M	12	155	41	155	2257	17.0656
2213	M	12	145	38	145	2257.84	18.0737
2214	M	12	159	54	159	2257.84	21.3599
2215	M	12	142	38	142	2260	18.8951
2216	M	12	157	39.4	157	2260	15.9844
2217	M	12	142	38	142	2260	18.8951
2218	M	12	157	39.4	157	2260	15.9844
2219	M	12	157	39.4	157	2260	15.9844
2220	M	12	153	34	153	2260	14.5243
2221	M	12	146	34	146	2263	15.9505
2222	M	12	146	34	146	2263	15.9505
2223	M	12	146	34	146	2263	15.9505
2224	M	12	153	41.3	153	2268	17.6428
2225	M	12	158	47	158	2268	18.8271
2226	M	12	160	50	160	2268	19.5312
2227	M	12	153	41.3	153	2268	17.6428
2228	M	12	158	47	158	2268	18.8271
2229	M	12	160	50	160	2268	19.5312
2230	M	12	158	47	158	2268	18.8271
2231	M	12	160	50	160	2268	19.5312
2232	M	12	170	52	170	2268	17.9931
2233	M	12	153	41.3	153	2268	17.6428
2234	M	12	156	46.3	156	2270	19.0253
2235	M	12	156	46.3	156	2270	19.0253
2236	M	12	156	46.3	156	2270	19.0253
2237	M	12	154	41	154	2273.68	17.2879
2238	M	12	142	35	142	2277	17.3081
2239	M	12	142	35	142	2277	17.3081
2240	M	12	163	51	163	2280	19.1953
2241	M	12	163	51	163	2280	19.1953
2242	M	12	163	51	163	2280	19.1953
2243	M	12	163	51	163	2280	19.1953
2244	M	12	163	51	163	2280	19.1953
2245	M	12	163	51	163	2280	19.1953
2246	M	12	152	45	152	2281.69	19.4771
2247	M	12	151	46	151	2281.69	20.1746
2248	M	12	174	65	174	2281.69	21.4692
2249	M	12	163	53	163	2284	19.9481
2250	M	12	144	36	144	2284	17.3611
2251	M	12	163	53	163	2284	19.9481
2252	M	12	144	36	144	2284	17.3611
2253	M	12	144	36	144	2284	17.3611
2254	M	12	167	59.4	167	2289	21.2987
2255	M	12	167	59.4	167	2289	21.2987
2256	M	12	167	59.4	167	2289	21.2987
2257	M	12	152	38	152	2289.75	16.4474
2258	M	12	158	42	158	2289.75	16.8242
2259	M	12	168	52	168	2289.75	18.424
2260	M	12	147	40	147	2289.75	18.5108
2261	M	12	152	48	152	2289.75	20.7756
2262	M	12	163	54	163	2290	20.3244
2263	M	12	163	54	163	2290	20.3244
2264	M	12	163	54	163	2290	20.3244
2265	M	12	152	39	152	2292	17.01
2266	M	12	152	39	152	2292	17.01
2267	M	12	150	45	150	2295	20
2268	M	12	154	40.5	154	2295	17.0771
2269	M	12	150	45	150	2295	20
2270	M	12	154	40.5	154	2295	17.0771
2271	M	12	154	40.5	154	2295	17.0771
2272	M	12	158	37	158	2300	14.8213
2273	M	12	158	37	158	2300	14.8213
2274	M	12	155	44.7	155	2302	18.6056
2275	M	12	155	44.7	155	2302	18.6056
2276	M	12	155	44.7	155	2302	18.6056
2277	M	12	165	46	165	2306.05	16.8962
2278	M	12	170	72	170	2306.05	24.9135
2279	M	12	148	39	148	2310	17.805
2280	M	12	170	44.7	170	2310	15.4671
2281	M	12	148	39	148	2310	17.805
2282	M	12	153	37.5	153	2310	16.0195
2283	M	12	170	44.7	170	2310	15.4671
2284	M	12	148	39	148	2310	17.805
2285	M	12	149	40	149	2310	18.0172
2286	M	12	165	43	165	2318	15.7943
2287	M	12	165	43	165	2318	15.7943
2288	M	12	165	43	165	2318	15.7943
2289	M	12	152	45	152	2322	19.4771
2290	M	12	159	43	159	2322	17.0088
2291	M	12	159	48	159	2322	18.9866
2292	M	12	152	45	152	2322	19.4771
2293	M	12	159	43	159	2322	17.0088
2294	M	12	159	48	159	2322	18.9866
2295	M	12	159	43	159	2322	17.0088
2296	M	12	152	45	152	2322	19.4771
2297	M	12	159	48	159	2322	18.9866
2298	M	12	155	44.5	155	2322.58	18.5224
2299	M	12	160	40	160	2324	15.625
2300	M	12	160	40	160	2324	15.625
2301	M	12	168	54.4	168	2327	19.2744
2302	M	12	168	54.4	168	2327	19.2744
2303	M	12	168	54.4	168	2327	19.2744
2304	M	12	155	41	155	2330.94	17.0656
2305	M	12	148	42	148	2333	19.1289
2306	M	12	156	40	156	2333	16.4366
2307	M	12	148	42	148	2333	19.1289
2308	M	12	156	40	156	2333	16.4366
2309	M	12	155	41	155	2339.35	17.0656
2310	M	12	157	50	157	2339.35	20.2848
2311	M	12	164	55	164	2339.35	20.4491
2312	M	12	154	51	154	2339.35	21.5045
2313	M	12	150	45	150	2340	20
2314	M	12	138	32	138	2340	16.8032
2315	M	12	162	55.3	162	2340	21.0715
2316	M	12	150	33	150	2340	14.6667
2317	M	12	150	45	150	2340	20
2318	M	12	138	32	138	2340	16.8032
2319	M	12	162	55.3	162	2340	21.0715
2320	M	12	141	36	141	2340	18.1077
2321	M	12	160	50	160	2340	19.5312
2322	M	12	146	38	146	2340	17.827
2323	M	12	162	55.3	162	2340	21.0715
2324	M	12	138	32	138	2340	16.8032
2325	M	12	150	33	150	2340	14.6667
2326	M	12	146	35	146	2340	16.4196
2327	M	12	169	49.8	169	2342	17.4364
2328	M	12	169	49.8	169	2342	17.4364
2329	M	12	169	49.8	169	2342	17.4364
2330	M	12	151	46.5	151	2347.83	20.3938
2331	M	12	160	46.7	160	2349	18.2422
2332	M	12	160	46.7	160	2349	18.2422
2333	M	12	160	46.7	160	2349	18.2422
2334	M	12	157	41	157	2350	16.6335
2335	M	12	157	41	157	2350	16.6335
2336	M	12	157	41	157	2350	16.6335
2337	M	12	149	37.6	149	2354	16.9362
2338	M	12	149	37.6	149	2354	16.9362
2339	M	12	149	37.6	149	2354	16.9362
2340	M	12	181	63	181	2358	19.4596
2341	M	12	181	63	181	2358	19.4596
2342	M	12	168	48.5	168	2359	17.184
2343	M	12	168	48.5	168	2359	17.184
2344	M	12	168	48.5	168	2359	17.184
2345	M	12	157	62	157	2360	25.1532
2346	M	12	157	62	157	2360	25.1532
2347	M	12	157	62	157	2360	25.1532
2348	M	12	151	40	151	2362	17.5431
2349	M	12	151	40	151	2362	17.5431
2350	M	12	151	40	151	2362	17.5431
2351	M	12	163	50	163	2364.96	18.8189
2352	M	12	152	45	152	2364.96	19.4771
2353	M	12	150	47	150	2366	20.8889
2354	M	12	150	47	150	2366	20.8889
2355	M	12	150	47	150	2366	20.8889
2356	M	12	175	70	175	2367	22.8571
2357	M	12	175	70	175	2367	22.8571
2358	M	12	175	70	175	2367	22.8571
2359	M	12	146	33	146	2370	15.4813
2360	M	12	146	33	146	2370	15.4813
2361	M	12	153	40	153	2373.63	17.0874
2362	M	12	156	42	156	2373.63	17.2584
2363	M	12	147	39	147	2375	18.0018
2364	M	12	147	39	147	2375	18.0018
2365	M	12	144	40	144	2380	19.2901
2366	M	12	144	40	144	2380	19.2901
2367	M	12	144	40	144	2380	19.2901
2368	M	12	158	47	158	2380	18.8271
2369	M	12	155	39	155	2382	16.2331
2370	M	12	155	39	155	2382	16.2331
2371	M	12	155	39	155	2382	16.2331
2372	M	12	151	43	151	2382.35	18.8588
2373	M	12	148	43	148	2382.35	19.6311
2374	M	12	147	40	147	2385	18.5108
2375	M	12	149	39	149	2385	17.5668
2376	M	12	147	40	147	2385	18.5108
2377	M	12	149	39	149	2385	17.5668
2378	M	12	168	54	168	2386	19.1327
2379	M	12	168	54	168	2386	19.1327
2380	M	12	168	54	168	2386	19.1327
2381	M	12	164	53.7	164	2396	19.9658
2382	M	12	164	53.7	164	2396	19.9658
2383	M	12	164	53.7	164	2396	19.9658
2384	M	12	162	51	162	2400	19.5473
2385	M	12	147	39	147	2400	18.048
2386	M	12	154	44	154	2400	18.5529
2387	M	12	161	59	161	2400	22.7615
2388	M	12	165	51	165	2400	18.7328
2389	M	12	144	38	144	2400	18.3256
2390	M	12	155	40	155	2400	16.6493
2391	M	12	155	47	155	2400	19.563
2392	M	12	157	47	157	2400	19.0677
2393	M	12	152	35	152	2400	15.1489
2394	M	12	162	51	162	2400	19.5473
2395	M	12	147	39	147	2400	18.048
2396	M	12	154	44	154	2400	18.5529
2397	M	12	161	59	161	2400	22.7615
2398	M	12	165	51	165	2400	18.7328
2399	M	12	144	38	144	2400	18.3256
2400	M	12	155	40	155	2400	16.6493
2401	M	12	155	47	155	2400	19.563
2402	M	12	157	47	157	2400	19.0677
2403	M	12	142	34	142	2400	16.8617
2404	M	12	155	43	155	2400	17.898
2405	M	12	165	43	165	2400	15.7943
2406	M	12	155	47	155	2400	19.563
2407	M	12	153	43	153	2400	18.369
2408	M	12	152	35	152	2400	15.1489
2409	M	12	170	51	170	2400	17.6471
2410	M	12	155	40	155	2400	16.6493
2411	M	12	144	38	144	2400	18.3256
2412	M	12	157	47	157	2400	19.0677
2413	M	12	152	47	152	2410	20.3428
2414	M	12	152	47	152	2410	20.3428
2415	M	12	152	47	152	2410	20.3428
2416	M	12	151	41	151	2414	17.9817
2417	M	12	151	41	151	2414	17.9817
2418	M	12	151	41	151	2414	17.9817
2419	M	12	147	38	147	2417	17.5853
2420	M	12	147	38	147	2417	17.5853
2421	M	12	147	38	147	2417	17.5853
2422	M	12	154	40	154	2418	16.8663
2423	M	12	159	52.5	159	2418	20.7666
2424	M	12	154	40	154	2418	16.8663
2425	M	12	159	52.5	159	2418	20.7666
2426	M	12	159	52.5	159	2418	20.7666
2427	M	12	154	40	154	2418	16.8663
2428	M	12	136	31	136	2420	16.7604
2429	M	12	136	31	136	2420	16.7604
2430	M	12	155	42	155	2427	17.4818
2431	M	12	155	42	155	2427	17.4818
2432	M	12	155	42	155	2427	17.4818
2433	M	12	150	37	150	2430	16.4444
2434	M	12	150	36	150	2430	16
2435	M	12	150	37	150	2430	16.4444
2436	M	12	150	36	150	2430	16
2437	M	12	150	37	150	2430	16.4444
2438	M	12	170	58	170	2440	20.0346
2439	M	12	170	58	170	2440	20.0346
2440	M	12	149.5	34.2	149.5	2444	15.3018
2441	M	12	149.5	34.2	149.5	2444	15.3018
2442	M	12	172	54	172	2446	18.2531
2443	M	12	172	54	172	2446	18.2531
2444	M	12	172	54	172	2446	18.2531
2445	M	12	152	44.5	152	2448	19.2607
2446	M	12	152	44.5	152	2448	19.2607
2447	M	12	152	44.5	152	2448	19.2607
2448	M	12	148	35	148	2450	16.1158
2449	M	12	157	38	157	2450	15.4164
2450	M	12	148	35	148	2450	16.1158
2451	M	12	157	43	157	2450	17.4449
2452	M	12	168	46	168	2460	16.2982
2453	M	12	168	46	168	2460	16.2982
2454	M	12	152	35	152	2463.88	15.1489
2455	M	12	170	62	170	2463.88	21.4533
2456	M	12	155	47	155	2468	19.563
2457	M	12	155	47	155	2468	19.563
2458	M	12	155	47	155	2468	19.563
2459	M	12	156	40.1	156	2477	16.4776
2460	M	12	156	40.1	156	2477	16.4776
2461	M	12	156	40.1	156	2477	16.4776
2462	M	12	139	32	139	2482.76	16.5623
2463	M	12	148	40	148	2482.76	18.2615
2464	M	12	161	55	161	2482.76	21.2183
2465	M	12	157	38.7	157	2490	15.7004
2466	M	12	157	38.7	157	2490	15.7004
2467	M	12	157	38.7	157	2490	15.7004
2468	M	12	146	38	146	2490	17.827
2469	M	12	156	44	156	2492.31	18.0802
2470	M	12	158	50	158	2492.31	20.0288
2471	M	12	176	72	176	2500	23.2438
2472	M	12	176	72	176	2500	23.2438
2473	M	12	176	72	176	2500	23.2438
2474	M	12	171	58.5	171	2501.93	20.0062
2475	M	12	152	39	152	2510	16.8802
2476	M	12	169	52	169	2510	18.2066
2477	M	12	152	39	152	2510	16.8802
2478	M	12	169	52	169	2510	18.2066
2479	M	12	152	39	152	2510	16.8802
2480	M	12	169	52	169	2510	18.2066
2481	M	12	146	34	146	2511.63	15.9505
2482	M	12	153	45.2	153	2516	19.3088
2483	M	12	159	42.4	159	2516	16.7715
2484	M	12	153	45.2	153	2516	19.3088
2485	M	12	159	42.4	159	2516	16.7715
2486	M	12	153	45.2	153	2516	19.3088
2487	M	12	159	42.4	159	2516	16.7715
2488	M	12	161	50	161	2518	19.2894
2489	M	12	161	50	161	2518	19.2894
2490	M	12	161	50	161	2518	19.2894
2491	M	12	140	32	140	2520	16.3265
2492	M	12	150	37	150	2520	16.4444
2493	M	12	162	50	162	2520	19.052
2494	M	12	140	32	140	2520	16.3265
2495	M	12	150	37	150	2520	16.4444
2496	M	12	162	50	162	2520	19.052
2497	M	12	153	44	153	2520	18.7962
2498	M	12	162	50	162	2520	19.052
2499	M	12	150	37	150	2520	16.4444
2500	M	12	146	35.8	146	2530	16.7949
2501	M	12	146	35.8	146	2530	16.7949
2502	M	12	146	35.8	146	2530	16.7949
2503	M	12	160	49	160	2531.25	19.1406
2504	M	12	141	38	141	2538	19.1137
2505	M	12	141	38	141	2538	19.1137
2506	M	12	141	38	141	2538	19.1137
2507	M	12	160	36	160	2540	14.0625
2508	M	12	161	50	161	2541.18	19.2894
2509	M	12	162	54.5	162	2544	20.7667
2510	M	12	162	54.5	162	2544	20.7667
2511	M	12	162	54.5	162	2544	20.7667
2512	M	12	161	48	161	2550	18.5178
2513	M	12	161	48	161	2550	18.5178
2514	M	12	161	48	161	2550	18.5178
2515	M	12	156	44	156	2551.18	18.0802
2516	M	12	156	46	156	2556	18.902
2517	M	12	156	46	156	2556	18.902
2518	M	12	156	46	156	2556	18.902
2519	M	12	153	45.7	153	2558	19.5224
2520	M	12	153	45.7	153	2558	19.5224
2521	M	12	153	45.7	153	2558	19.5224
2522	M	12	146	42	146	2560	19.7035
2523	M	12	157	45	157	2561.26	18.2563
2524	M	12	146	38.6	146	2565	18.1085
2525	M	12	146	38.6	146	2565	18.1085
2526	M	12	146	38.6	146	2565	18.1085
2527	M	12	168	47	168	2580	16.6525
2528	M	12	155	36	155	2580	14.9844
2529	M	12	168	47	168	2580	16.6525
2530	M	12	152	37	152	2580	16.0145
2531	M	12	155	36	155	2580	14.9844
2532	M	12	168	47	168	2580	16.6525
2533	M	12	152	45	152	2592	19.4771
2534	M	12	152	45	152	2592	19.4771
2535	M	12	152	45	152	2592	19.4771
2536	M	12	165	65	165	2600	23.8751
2537	M	12	165	65	165	2600	23.8751
2538	M	12	185	70.8	185	2601	20.6866
2539	M	12	145.5	32	145.5	2601	15.1156
2540	M	12	185	70.8	185	2601	20.6866
2541	M	12	145.5	32	145.5	2601	15.1156
2542	M	12	185	70.8	185	2601	20.6866
2543	M	12	141	31.8	141	2606	15.9952
2544	M	12	141	31.8	141	2606	15.9952
2545	M	12	141	31.8	141	2606	15.9952
2546	M	12	157	42.5	157	2610	17.2421
2547	M	12	157	42.5	157	2610	17.2421
2548	M	12	157	42.5	157	2610	17.2421
2549	M	12	167	44.5	167	2611	15.9561
2550	M	12	167	44.5	167	2611	15.9561
2551	M	12	167	44.5	167	2611	15.9561
2552	M	12	159.5	44.8	159.5	2616	17.6099
2553	M	12	165.5	53	165.5	2616	19.35
2554	M	12	159.5	44.8	159.5	2616	17.6099
2555	M	12	165.5	53	165.5	2616	19.35
2556	M	12	165.5	53	165.5	2616	19.35
2557	M	12	159.5	44.8	159.5	2616	17.6099
2558	M	12	146	36	146	2623.48	16.8887
2559	M	12	167	47	167	2634.15	16.8525
2560	M	12	168	53.3	168	2639	18.8846
2561	M	12	168	53.3	168	2639	18.8846
2562	M	12	168	53.3	168	2639	18.8846
2563	M	12	140	34	140	2640	17.3469
2564	M	12	140	34	140	2640	17.3469
2565	M	12	140	34	140	2640	17.3469
2566	M	12	147	38	147	2669	17.5853
2567	M	12	147	38	147	2669	17.5853
2568	M	12	147	38	147	2669	17.5853
2569	M	12	161	48	161	2670	18.5178
2570	M	12	161	48	161	2670	18.5178
2571	M	12	156	34	156	2677.69	13.9711
2572	M	12	156	42	156	2680	17.2584
2573	M	12	142	28	142	2700	13.8861
2574	M	12	156	42	156	2700	17.2584
2575	M	12	161	50	161	2700	19.2894
2576	M	12	142	28	142	2700	13.8861
2577	M	12	156	42	156	2700	17.2584
2578	M	12	161	50	161	2700	19.2894
2579	M	12	164	48	164	2700	17.8465
2580	M	12	161	50	161	2700	19.2894
2581	M	12	156	42	156	2700	17.2584
2582	M	12	158	45	158	2711.3	18.026
2583	M	12	172	63	172	2730	21.2953
2584	M	12	172	63	172	2730	21.2953
2585	M	12	172	63	172	2730	21.2953
2586	M	12	167	46	167	2734.18	16.494
2587	M	12	170	55	170	2757.45	19.0311
2588	M	12	145.5	34	145.5	2760	16.0603
2589	M	12	145	41	145	2772	19.5006
2590	M	12	145	41	145	2772	19.5006
2591	M	12	145	41	145	2772	19.5006
2592	M	12	155	40	155	2800	16.6493
2593	M	12	156	39	156	2800	16.0256
2594	M	12	170	40	170	2800	13.8408
2595	M	12	155	40	155	2800	16.6493
2596	M	12	156	39	156	2800	16.0256
2597	M	12	170	40	170	2800	13.8408
2598	M	12	159	37	159	2805.19	14.6355
2599	M	12	152	41.5	152	2805.19	17.9623
2600	M	12	158	43.5	158	2817.39	17.4251
2601	M	12	153	40	153	2820	17.0874
2602	M	12	153	40	153	2820	17.0874
2603	M	12	150	42	150	2820	18.6667
2604	M	12	153	40	153	2820	17.0874
2605	M	12	142	33	142	2880	16.3658
2606	M	12	154	38	154	2880	16.0229
2607	M	12	142	33	142	2880	16.3658
2608	M	12	154	38	154	2880	16.0229
2609	M	12	156	44	156	2880	18.0802
2610	M	12	154	38	154	2880	16.0229
2611	M	12	145	35	145	2881	16.6468
2612	M	12	145	35	145	2881	16.6468
2613	M	12	145	35	145	2881	16.6468
2614	M	12	154	36	154	2960	15.1796
2615	M	12	154	36	154	2960	15.1796
2616	M	12	148	37	148	3200	16.8919
2617	M	12	156	36	156	3200	14.7929
2618	M	12	164	49	164	3200	18.2183
2619	M	12	164	50	164	3200	18.5901
2620	M	12	148	37	148	3200	16.8919
2621	M	12	156	36	156	3200	14.7929
2622	M	12	164	49	164	3200	18.2183
2623	M	12	164	50	164	3200	18.5901

## Sheet: regressione m12
SUMMARY OUTPUT
Regression Statistics
Multiple R	0.345072
R Square	0.119075
Adjusted R Square	0.117844
Standard Error	346.587
Observations	1435
ANOVA
	df	SS	MS	F	Significance F
Regression	2	2.32513e+07	1.16256e+07	96.7817	3.77062e-40
Residual	1432	1.72015e+08	120122
Total	1434	1.95267e+08
	Coefficients	Standard Error	t Stat	P-value	Lower 95%	Upper 95%	Lower 95,0%	Upper 95,0%
Intercept	396.514	199.787	1.98468	0.0473707	4.60669	788.421	4.60669	788.421
M (kg)	-16.5032	1.18917	-13.8779	3.51804e-41	-18.8359	-14.1705	-18.8359	-14.1705
H (cm)	15.5909	1.50611	10.3518	2.8743e-24	12.6365	18.5454	12.6365	18.5454

## Sheet: m13
ID	Sex	Age (years)	H (cm)	M (kg)	H (cm)	12minRT (m)	bmi
2624	M	13	167	57	167	1008	20.4382
2625	M	13	163	48	163	1056	18.0662
2626	M	13	163	60	163	1080	22.5827
2627	M	13	161	69	161	1097	26.6193
2628	M	13	188	69	188	1104	19.5224
2629	M	13	164	54	164	1160	20.0773
2630	M	13	164	54	164	1160	20.0773
2631	M	13	161	41	161	1176	15.8173
2632	M	13	170	60	170	1194	20.7612
2633	M	13	170	60	170	1194	20.7612
2634	M	13	162	54	162	1200	20.5761
2635	M	13	148	57	148	1200	26.0226
2636	M	13	178	65	178	1290	20.5151
2637	M	13	178	65	178	1290	20.5151
2638	M	13	178	65	178	1290	20.5151
2639	M	13	148	35	148	1294	15.9788
2640	M	13	166	45	166	1296	16.3304
2641	M	13	166	47.7	166	1314	17.3102
2642	M	13	169	56.4	169	1314	19.7472
2643	M	13	166	47.7	166	1314	17.3102
2644	M	13	169	56.4	169	1314	19.7472
2645	M	13	166	47.7	166	1314	17.3102
2646	M	13	169	56.4	169	1314	19.7472
2647	M	13	165	88	165	1330	32.3232
2648	M	13	165	88	165	1330	32.3232
2649	M	13	165	88	165	1330	32.3232
2650	M	13	165	88	165	1330	32.3232
2651	M	13	165	88	165	1330	32.3232
2652	M	13	165	88	165	1330	32.3232
2653	M	13	165	88	165	1330	32.3232
2654	M	13	165	88	165	1330	32.3232
2655	M	13	165	88	165	1330	32.3232
2656	M	13	165	88	165	1330	32.3232
2657	M	13	165	88	165	1330	32.3232
2658	M	13	165	88	165	1330	32.3232
2659	M	13	157	38	157	1344	15.4164
2660	M	13	154	77	154	1366	32.4675
2661	M	13	164.5	75	164.5	1384	27.7159
2662	M	13	160	64	160	1400	25
2663	M	13	160	64	160	1400	25
2664	M	13	160	64	160	1400	25
2665	M	13	160	64	160	1400	25
2666	M	13	160	64	160	1400	25
2667	M	13	160	64	160	1400	25
2668	M	13	160	64	160	1400	25
2669	M	13	160	64	160	1400	25
2670	M	13	161	63	161	1400	24.3046
2671	M	13	160	64	160	1400	25
2672	M	13	160	64	160	1400	25
2673	M	13	160	64	160	1400	25
2674	M	13	160	64	160	1400	25
2675	M	13	149	38	149	1400	17.1163
2676	M	13	160	45	160	1416	17.5781
2677	M	13	165	40	165	1416	14.6924
2678	M	13	156	83	156	1430	34.2702
2679	M	13	156	83	156	1430	34.2702
2680	M	13	162	52	162	1440	19.8141
2681	M	13	170	55	170	1458	19.0311
2682	M	13	170	55	170	1458	19.0311
2683	M	13	170	55	170	1458	19.0311
2684	M	13	172	80	172	1464	27.0416
2685	M	13	172	80	172	1464	27.0416
2686	M	13	169	60	169	1480	21.0077
2687	M	13	169	60	169	1480	21.0077
2688	M	13	169	60	169	1480	21.0077
2689	M	13	174	71	174	1500	23.4509
2690	M	13	174	71	174	1500	23.4509
2691	M	13	155	50	155	1512	20.8117
2692	M	13	164	60	164	1512	22.3081
2693	M	13	155	50	155	1512	20.8117
2694	M	13	164	60	164	1512	22.3081
2695	M	13	164	60	164	1512	22.3081
2696	M	13	155	50	155	1512	20.8117
2697	M	13	159	71	159	1550	28.0843
2698	M	13	159	71	159	1550	28.0843
2699	M	13	161	59	161	1562	22.7615
2700	M	13	161	59	161	1562	22.7615
2701	M	13	161	59	161	1562	22.7615
2702	M	13	166	60	166	1570	21.7738
2703	M	13	166	55	166	1580	19.9594
2704	M	13	166	55	166	1580	19.9594
2705	M	13	160	44.3	160	1600	17.3047
2706	M	13	160	44.3	160	1600	17.3047
2707	M	13	151	39	151	1600	17.1045
2708	M	13	166	62.4	166	1600	22.6448
2709	M	13	160	44.3	160	1600	17.3047
2710	M	13	172	65	172	1610	21.9713
2711	M	13	172	65	172	1610	21.9713
2712	M	13	172	65	172	1610	21.9713
2713	M	13	165	60	165	1620	22.0386
2714	M	13	161	73.2	161	1620	28.2397
2715	M	13	165	60	165	1620	22.0386
2716	M	13	168	104	168	1620	36.8481
2717	M	13	166	50	166	1620	18.1449
2718	M	13	165	60	165	1620	22.0386
2719	M	13	163	46	163	1620	17.3134
2720	M	13	161	73.2	161	1620	28.2397
2721	M	13	154	57	154	1628.14	24.0344
2722	M	13	157	56.6	157	1629	22.9624
2723	M	13	157	56.6	157	1629	22.9624
2724	M	13	157	56.6	157	1629	22.9624
2725	M	13	150	40	150	1640.51	17.7778
2726	M	13	181	91.6	181	1642	27.9601
2727	M	13	181	91.6	181	1642	27.9601
2728	M	13	159	52	159	1653	20.5688
2729	M	13	159	52	159	1653	20.5688
2730	M	13	159	52	159	1653	20.5688
2731	M	13	164	69.6	164	1661	25.8775
2732	M	13	164	69.6	164	1661	25.8775
2733	M	13	164	69.6	164	1661	25.8775
2734	M	13	161	77.5	161	1674	29.8985
2735	M	13	171	72	171	1674	24.623
2736	M	13	160	55	160	1680	21.4844
2737	M	13	163	55.6	163	1680	20.9266
2738	M	13	160	55	160	1680	21.4844
2739	M	13	163	55.6	163	1680	20.9266
2740	M	13	163	55.6	163	1680	20.9266
2741	M	13	158	38	158	1682	15.2219
2742	M	13	158	38	158	1682	15.2219
2743	M	13	155	50	155	1683.12	20.8117
2744	M	13	162	59.1	162	1688	22.5194
2745	M	13	162	59.1	162	1688	22.5194
2746	M	13	162	59.1	162	1688	22.5194
2747	M	13	153	45	153	1690	19.2234
2748	M	13	163	61	163	1690	22.9591
2749	M	13	153	45	153	1690	19.2234
2750	M	13	163	61	163	1690	22.9591
2751	M	13	153	45	153	1690	19.2234
2752	M	13	163	61	163	1690	22.9591
2753	M	13	157	41	157	1698	16.6335
2754	M	13	157	41	157	1698	16.6335
2755	M	13	157	41	157	1698	16.6335
2756	M	13	160	48	160	1700	18.75
2757	M	13	165	62.5	165	1700	22.9568
2758	M	13	164	86	164	1700	31.975
2759	M	13	160	48	160	1700	18.75
2760	M	13	165	62.5	165	1700	22.9568
2761	M	13	160	66	160	1700	25.7812
2762	M	13	160	48	160	1700	18.75
2763	M	13	164	86	164	1700	31.975
2764	M	13	165	62.5	165	1700	22.9568
2765	M	13	145	32	145	1701	15.22
2766	M	13	145	32	145	1701	15.22
2767	M	13	172	62.5	172	1703	21.1263
2768	M	13	172	62.5	172	1703	21.1263
2769	M	13	172	62.5	172	1703	21.1263
2770	M	13	188	87	188	1705.26	24.6152
2771	M	13	165	41.5	165	1708	15.2433
2772	M	13	165	59	165	1720	21.6713
2773	M	13	181	82	181	1720	25.0298
2774	M	13	165	59	165	1720	21.6713
2775	M	13	181	82	181	1720	25.0298
2776	M	13	165	59	165	1720	21.6713
2777	M	13	181	82	181	1720	25.0298
2778	M	13	160	40	160	1721	15.625
2779	M	13	160	40	160	1721	15.625
2780	M	13	167	86.5	167	1725	31.0158
2781	M	13	160	53.9	160	1728	21.0547
2782	M	13	170	63	170	1728	21.7993
2783	M	13	170	81	170	1728	28.0277
2784	M	13	160	53.9	160	1728	21.0547
2785	M	13	170	63	170	1728	21.7993
2786	M	13	170	63	170	1728	21.7993
2787	M	13	170	81	170	1728	28.0277
2788	M	13	187	80.9	187	1728	23.1348
2789	M	13	160	53.9	160	1728	21.0547
2790	M	13	154	44	154	1729	18.5529
2791	M	13	154	44	154	1729	18.5529
2792	M	13	154	44	154	1729	18.5529
2793	M	13	155	52.8	155	1730	21.9771
2794	M	13	156	45	156	1730	18.4911
2795	M	13	155	52.8	155	1730	21.9771
2796	M	13	156	45	156	1730	18.4911
2797	M	13	156	45	156	1730	18.4911
2798	M	13	155	52.8	155	1730	21.9771
2799	M	13	176	70	176	1742	22.5981
2800	M	13	176	70	176	1742	22.5981
2801	M	13	176	70	176	1742	22.5981
2802	M	13	150	58	150	1746.63	25.7778
2803	M	13	161	64	161	1748	24.6904
2804	M	13	161	64	161	1748	24.6904
2805	M	13	161	64	161	1748	24.6904
2806	M	13	166	84	166	1750	30.4834
2807	M	13	166	84	166	1750	30.4834
2808	M	13	166	45.8	166	1752	16.6207
2809	M	13	167	74	167	1755	26.5338
2810	M	13	167	74	167	1755	26.5338
2811	M	13	159	48.45	159	1760	19.1646
2812	M	13	159	48.45	159	1760	19.1646
2813	M	13	164	55	164	1760	20.4491
2814	M	13	159	48.45	159	1760	19.1646
2815	M	13	160	57.5	160	1762	22.4609
2816	M	13	163	58	163	1765	21.83
2817	M	13	163	58	163	1765	21.83
2818	M	13	163	58	163	1765	21.83
2819	M	13	174	56	174	1768	18.4965
2820	M	13	174	56	174	1768	18.4965
2821	M	13	159	49.9	159	1769	19.7381
2822	M	13	159	49.9	159	1769	19.7381
2823	M	13	159	49.9	159	1769	19.7381
2824	M	13	174	91	174	1773	30.0568
2825	M	13	174	91	174	1773	30.0568
2826	M	13	161	49	161	1779	18.9036
2827	M	13	156	42.6	156	1780	17.5049
2828	M	13	156	42.6	156	1780	17.5049
2829	M	13	156	42.6	156	1780	17.5049
2830	M	13	175	74.2	175	1782	24.2286
2831	M	13	175	74.2	175	1782	24.2286
2832	M	13	175	74.2	175	1782	24.2286
2833	M	13	170	64.8	170	1785	22.4221
2834	M	13	170	64.8	170	1785	22.4221
2835	M	13	170	64.8	170	1785	22.4221
2836	M	13	163	59	163	1787	22.2063
2837	M	13	163	59	163	1787	22.2063
2838	M	13	163	59	163	1787	22.2063
2839	M	13	151	41	151	1790	17.9817
2840	M	13	152	41.35	152	1790	17.8973
2841	M	13	153	44.15	153	1790	18.8603
2842	M	13	151	41	151	1790	17.9817
2843	M	13	152	41.35	152	1790	17.8973
2844	M	13	153	44.15	153	1790	18.8603
2845	M	13	152	41.35	152	1790	17.8973
2846	M	13	153	44.15	153	1790	18.8603
2847	M	13	165	50	165	1795.01	18.3655
2848	M	13	148	55	148	1800	25.1096
2849	M	13	163	72	163	1800	27.0993
2850	M	13	154	43	154	1800	18.1312
2851	M	13	148	55	148	1800	25.1096
2852	M	13	163	72	163	1800	27.0993
2853	M	13	154	43	154	1800	18.1312
2854	M	13	154	43	154	1800	18.1312
2855	M	13	156	52.5	156	1808	21.573
2856	M	13	156	52.5	156	1808	21.573
2857	M	13	156	52.5	156	1808	21.573
2858	M	13	173	54	173	1815.13	18.0427
2859	M	13	155	50	155	1820	20.8117
2860	M	13	158	51	158	1820	20.4294
2861	M	13	161	74.5	161	1820	28.7412
2862	M	13	155	50	155	1820	20.8117
2863	M	13	158	51	158	1820	20.4294
2864	M	13	155	50	155	1820	20.8117
2865	M	13	158	51	158	1820	20.4294
2866	M	13	161	74.5	161	1820	28.7412
2867	M	13	152	58	152	1820	25.1039
2868	M	13	153	36	153	1830	15.1651
2869	M	13	153	36	153	1830	15.1651
2870	M	13	169	52	169	1832	18.2066
2871	M	13	169	52	169	1832	18.2066
2872	M	13	169	52	169	1832	18.2066
2873	M	13	151	59.3	151	1835	26.0076
2874	M	13	151	59.3	151	1835	26.0076
2875	M	13	151	59.3	151	1835	26.0076
2876	M	13	158	50.8	158	1836	20.3493
2877	M	13	165	60	165	1836	22.0386
2878	M	13	158	50.8	158	1836	20.3493
2879	M	13	165	60	165	1836	22.0386
2880	M	13	165	60	165	1836	22.0386
2881	M	13	158	50.8	158	1836	20.3493
2882	M	13	156	38	156	1836.5	15.6147
2883	M	13	156	38	156	1836.5	15.6147
2884	M	13	165	54	165	1838	19.8347
2885	M	13	165	54	165	1838	19.8347
2886	M	13	176	65.7	176	1845	21.21
2887	M	13	176	65.7	176	1845	21.21
2888	M	13	176	65.7	176	1845	21.21
2889	M	13	177	81	177	1850	25.695
2890	M	13	161	60	161	1850	23.1473
2891	M	13	160	68	160	1850	26.5625
2892	M	13	177	81	177	1850	25.695
2893	M	13	161	60	161	1850	23.1473
2894	M	13	160	68	160	1850	26.5625
2895	M	13	163	65	163	1860	24.4646
2896	M	13	163	65	163	1860	24.4646
2897	M	13	158	41	158	1862	16.4237
2898	M	13	168	58	168	1863	20.5499
2899	M	13	168	58	168	1863	20.5499
2900	M	13	168	58	168	1863	20.5499
2901	M	13	162	65	162	1864	24.7676
2902	M	13	163	69	163	1864	25.9701
2903	M	13	157	56	157	1867.44	22.719
2904	M	13	150	39	150	1870	17.3333
2905	M	13	150	39	150	1870	17.3333
2906	M	13	168	58	168	1872.83	20.5499
2907	M	13	167	74	167	1875	26.5338
2908	M	13	170	65.6	170	1880	22.699
2909	M	13	170	65.6	170	1880	22.699
2910	M	13	170	65.6	170	1880	22.699
2911	M	13	162	63.5	162	1890	24.196
2912	M	13	142	49	142	1890	24.3007
2913	M	13	163	51	163	1890	19.1953
2914	M	13	164	69	164	1890	25.6544
2915	M	13	170	51	170	1890	17.6471
2916	M	13	167	44.4	167	1890	15.9203
2917	M	13	162	63.5	162	1890	24.196
2918	M	13	142	49	142	1890	24.3007
2919	M	13	163	51	163	1890	19.1953
2920	M	13	164	69	164	1890	25.6544
2921	M	13	170	51	170	1890	17.6471
2922	M	13	170	51	170	1890	17.6471
2923	M	13	163	51	163	1890	19.1953
2924	M	13	164	69	164	1890	25.6544
2925	M	13	167	44.4	167	1890	15.9203
2926	M	13	162	63.5	162	1890	24.196
2927	M	13	159	56	159	1890	22.151
2928	M	13	153	46	153	1894.74	19.6506
2929	M	13	178	83	178	1900	26.1962
2930	M	13	178	83	178	1900	26.1962
2931	M	13	178	83	178	1900	26.1962
2932	M	13	152	59	152	1900	25.5367
2933	M	13	168	60	168	1900.29	21.2585
2934	M	13	158	58	158	1905.88	23.2335
2935	M	13	148	43.5	148	1911.5	19.8594
2936	M	13	163	54	163	1920	20.1362
2937	M	13	162	51.65	162	1920	19.6807
2938	M	13	150	45	150	1920	20
2939	M	13	154	55	154	1920	23.1911
2940	M	13	163	54	163	1920	20.1362
2941	M	13	162	51.65	162	1920	19.6807
2942	M	13	150	45	150	1920	20
2943	M	13	154	55	154	1920	23.1911
2944	M	13	154	55	154	1920	23.1911
2945	M	13	162	51.65	162	1920	19.6807
2946	M	13	150	45	150	1920	20
2947	M	13	159.5	67	159.5	1926	26.3362
2948	M	13	159.5	67	159.5	1926	26.3362
2949	M	13	153	44	153	1930	18.5826
2950	M	13	170	57	170	1930	19.7232
2951	M	13	162	46	162	1930	17.5278
2952	M	13	153	44	153	1930	18.5826
2953	M	13	170	57	170	1930	19.7232
2954	M	13	162	46	162	1930	17.5278
2955	M	13	162	46	162	1930	17.5278
2956	M	13	159	52	159	1940	20.5688
2957	M	13	169	52	169	1944	18.2066
2958	M	13	163	71	163	1944	26.7229
2959	M	13	169	52	169	1944	18.2066
2960	M	13	169	52	169	1944	18.2066
2961	M	13	163	71	163	1944	26.7229
2962	M	13	153	40	153	1950	17.0874
2963	M	13	155	39	155	1950	16.2331
2964	M	13	159	51	159	1950	20.1733
2965	M	13	161	46	161	1950	17.7462
2966	M	13	161	58	161	1950	22.3757
2967	M	13	172	72	172	1950	24.3375
2968	M	13	173	60	173	1950	20.0474
2969	M	13	149	33.6	149	1950	15.1345
2970	M	13	153	40	153	1950	17.0874
2971	M	13	155	39	155	1950	16.2331
2972	M	13	159	51	159	1950	20.1733
2973	M	13	161	46	161	1950	17.7462
2974	M	13	161	58	161	1950	22.3757
2975	M	13	172	72	172	1950	24.3375
2976	M	13	173	60	173	1950	20.0474
2977	M	13	159	51	159	1950	20.1733
2978	M	13	161	46	161	1950	17.7462
2979	M	13	155	39	155	1950	16.2331
2980	M	13	149	33.6	149	1950	15.1345
2981	M	13	161	58	161	1950	22.3757
2982	M	13	173	60	173	1950	20.0474
2983	M	13	172	72	172	1950	24.3375
2984	M	13	163	66	163	1957.7	24.841
2985	M	13	157	58	157	1960	23.5304
2986	M	13	141	32.8	141	1960	16.4982
2987	M	13	157	58	157	1960	23.5304
2988	M	13	141	32.8	141	1960	16.4982
2989	M	13	141	32.8	141	1960	16.4982
2990	M	13	161	59	161	1963	22.7615
2991	M	13	161	59	161	1963	22.7615
2992	M	13	161	59	161	1963	22.7615
2993	M	13	170	58.5	170	1970	20.2422
2994	M	13	170	58.5	170	1970	20.2422
2995	M	13	170	58.5	170	1970	20.2422
2996	M	13	146	38	146	1975	17.827
2997	M	13	158	63	158	1978	25.2363
2998	M	13	158	63	158	1978	25.2363
2999	M	13	158	63	158	1978	25.2363
3000	M	13	146	44	146	1980	20.6418
3001	M	13	161	52	161	1980	20.061
3002	M	13	146	44	146	1980	20.6418
3003	M	13	161	52	161	1980	20.061
3004	M	13	161	52	161	1980	20.061
3005	M	13	154	39.6	154	1985	16.6976
3006	M	13	154	39.6	154	1985	16.6976
3007	M	13	154	39.6	154	1985	16.6976
3008	M	13	175	60	175	1998	19.4939
3009	M	13	175	60	175	1998	19.4939
3010	M	13	148	33	148	2000	15.0657
3011	M	13	159	42	159	2000	16.7319
3012	M	13	158	51	158	2000	20.5996
3013	M	13	162	63	162	2000	23.8531
3014	M	13	143	41	143	2000	20.0499
3015	M	13	157	53	157	2000	21.5019
3016	M	13	157.5	51.1	157.5	2000	20.5996
3017	M	13	162	41.5	162	2000	15.8131
3018	M	13	162	62.6	162	2000	23.8531
3019	M	13	164	70	164	2000	26.0262
3020	M	13	164	53.1	164	2000	19.7427
3021	M	13	159	53	159	2000	20.9644
3022	M	13	153	49	153	2000	20.9321
3023	M	13	170	69.5	170	2000	24.0484
3024	M	13	170	53	170	2000	18.3391
3025	M	13	172	60.5	172	2000	20.4502
3026	M	13	148	33	148	2000	15.0657
3027	M	13	159	42	159	2000	16.7319
3028	M	13	158	51	158	2000	20.5996
3029	M	13	162	63	162	2000	23.8531
3030	M	13	143	41	143	2000	20.0499
3031	M	13	157	53	157	2000	21.5019
3032	M	13	157.5	51.1	157.5	2000	20.5996
3033	M	13	162	41.5	162	2000	15.8131
3034	M	13	162	62.6	162	2000	23.8531
3035	M	13	164	70	164	2000	26.0262
3036	M	13	164	53.1	164	2000	19.7427
3037	M	13	159	53	159	2000	20.9644
3038	M	13	153	49	153	2000	20.9321
3039	M	13	170	69.5	170	2000	24.0484
3040	M	13	170	53	170	2000	18.3391
3041	M	13	172	60.5	172	2000	20.4502
3042	M	13	160	56	160	2000	21.875
3043	M	13	171	70	171	2000	23.939
3044	M	13	170	53	170	2000	18.3391
3045	M	13	159	53	159	2000	20.9644
3046	M	13	153	49	153	2000	20.9321
3047	M	13	172	60.5	172	2000	20.4502
3048	M	13	170	69.5	170	2000	24.0484
3049	M	13	162	57.8	162	2005	22.0241
3050	M	13	162	57.8	162	2005	22.0241
3051	M	13	162	57.8	162	2005	22.0241
3052	M	13	153	38	153	2010	16.0195
3053	M	13	170	50.2	170	2010	17.3702
3054	M	13	153	38	153	2010	16.0195
3055	M	13	170	50.2	170	2010	17.3702
3056	M	13	170	50.2	170	2010	17.3702
3057	M	13	161	42	161	2011	16.2031
3058	M	13	178	77	178	2013	24.3025
3059	M	13	178	77	178	2013	24.3025
3060	M	13	178	77	178	2013	24.3025
3061	M	13	158	76	158	2020	30.3237
3062	M	13	158	76	158	2020	30.3237
3063	M	13	155	35	155	2022	14.6098
3064	M	13	155	35	155	2022	14.6098
3065	M	13	160	43	160	2025	16.7969
3066	M	13	167	53	167	2025	19.0039
3067	M	13	158	49	158	2025	19.6283
3068	M	13	157	43	157	2030	17.2826
3069	M	13	157	44	157	2030	17.8506
3070	M	13	159	68.85	159	2030	27.2339
3071	M	13	157	43	157	2030	17.2826
3072	M	13	157	44	157	2030	17.8506
3073	M	13	159	68.85	159	2030	27.2339
3074	M	13	174	70	174	2031	23.1206
3075	M	13	174	70	174	2031	23.1206
3076	M	13	174	70	174	2031	23.1206
3077	M	13	161	44.5	161	2035	17.1675
3078	M	13	161	44.5	161	2035	17.1675
3079	M	13	161	44.5	161	2035	17.1675
3080	M	13	183	75	183	2036	22.3954
3081	M	13	183	75	183	2036	22.3954
3082	M	13	164	49	164	2037	18.2183
3083	M	13	164	49	164	2037	18.2183
3084	M	13	164	49	164	2037	18.2183
3085	M	13	155	54	155	2037.74	22.4766
3086	M	13	160	68	160	2037.74	26.5625
3087	M	13	166	55	166	2040	20.0319
3088	M	13	160	47	160	2040	18.3594
3089	M	13	175	52.25	175	2040	17.0612
3090	M	13	166	55	166	2040	20.0319
3091	M	13	160	47	160	2040	18.3594
3092	M	13	175	52.25	175	2040	17.0612
3093	M	13	175	52.25	175	2040	17.0612
3094	M	13	156	41	156	2040	16.8475
3095	M	13	171	72	171	2043	24.623
3096	M	13	171	72	171	2043	24.623
3097	M	13	171	72	171	2043	24.623
3098	M	13	175	69	175	2044.16	22.5306
3099	M	13	164	48	164	2050	17.7722
3100	M	13	165	46.5	165	2050	17.0799
3101	M	13	167	49	167	2050	17.5697
3102	M	13	164	48	164	2050	17.7722
3103	M	13	165	46.5	165	2050	17.0799
3104	M	13	167	49	167	2050	17.5697
3105	M	13	165	46.5	165	2050	17.0799
3106	M	13	167	49	167	2050	17.5697
3107	M	13	154	55.5	154	2050.63	23.4019
3108	M	13	165	55	165	2052	20.202
3109	M	13	165	55	165	2052	20.202
3110	M	13	159	48	159	2055	18.9866
3111	M	13	159	48	159	2055	18.9866
3112	M	13	159	48	159	2055	18.9866
3113	M	13	173	73	173	2058	24.3911
3114	M	13	173	73	173	2058	24.3911
3115	M	13	173	73	173	2058	24.3911
3116	M	13	153	41.2	153	2059	17.6001
3117	M	13	153	41.2	153	2059	17.6001
3118	M	13	153	41.2	153	2059	17.6001
3119	M	13	179	68	179	2067	21.2228
3120	M	13	179	68	179	2067	21.2228
3121	M	13	160	53	160	2070	20.7031
3122	M	13	160	53	160	2070	20.7031
3123	M	13	158	57.8	158	2073	23.1533
3124	M	13	158	57.8	158	2073	23.1533
3125	M	13	158	57.8	158	2073	23.1533
3126	M	13	170	67	170	2074	23.1834
3127	M	13	170	67	170	2074	23.1834
3128	M	13	170	67	170	2074	23.1834
3129	M	13	157	58	157	2079	23.5304
3130	M	13	157	58	157	2079	23.5304
3131	M	13	157	58	157	2079	23.5304
3132	M	13	168	58	168	2080	20.479
3133	M	13	153	44	153	2080	18.7962
3134	M	13	160	54.9	160	2080	21.4453
3135	M	13	168	58	168	2080	20.479
3136	M	13	153	44	153	2080	18.7962
3137	M	13	160	54.9	160	2080	21.4453
3138	M	13	160	54.9	160	2080	21.4453
3139	M	13	155	50	155	2082	20.8533
3140	M	13	155	50	155	2082	20.8533
3141	M	13	141	33	141	2084	16.5988
3142	M	13	141	33	141	2084	16.5988
3143	M	13	141	33	141	2084	16.5988
3144	M	13	162	49.8	162	2085	18.9758
3145	M	13	162	49.8	162	2085	18.9758
3146	M	13	162	49.8	162	2085	18.9758
3147	M	13	162	49	162	2090	18.6709
3148	M	13	177	59	177	2090	18.8324
3149	M	13	162	49	162	2090	18.6709
3150	M	13	177	59	177	2090	18.8324
3151	M	13	177	59	177	2090	18.8324
3152	M	13	162	49	162	2090	18.6709
3153	M	13	150	43	150	2090.32	19.1111
3154	M	13	167	54	167	2090.32	19.3625
3155	M	13	156	53	156	2090.32	21.7784
3156	M	13	177	89	177	2090.32	28.4082
3157	M	13	162	57.6	162	2093	21.9479
3158	M	13	162	57.6	162	2093	21.9479
3159	M	13	162	57.6	162	2093	21.9479
3160	M	13	172.5	59.8	172.5	2096	20.0966
3161	M	13	172.5	59.8	172.5	2096	20.0966
3162	M	13	172.5	59.8	172.5	2096	20.0966
3163	M	13	156	43	156	2100	17.6693
3164	M	13	161	43.55	161	2100	16.801
3165	M	13	171	54.8	171	2100	18.7408
3166	M	13	154	45	154	2100	18.9745
3167	M	13	155	45	155	2100	18.7305
3168	M	13	161	41	161	2100	15.8173
3169	M	13	167	44	167	2100	15.7768
3170	M	13	156	43	156	2100	17.6693
3171	M	13	161	43.55	161	2100	16.801
3172	M	13	171	54.8	171	2100	18.7408
3173	M	13	154	45	154	2100	18.9745
3174	M	13	155	45	155	2100	18.7305
3175	M	13	155	45	155	2100	18.7305
3176	M	13	161	43.55	161	2100	16.801
3177	M	13	171	54.8	171	2100	18.7408
3178	M	13	161	41	161	2100	15.8173
3179	M	13	154	45	154	2100	18.9745
3180	M	13	167	44	167	2100	15.7768
3181	M	13	158	48	158	2100	19.2277
3182	M	13	166	63	166	2100	22.8625
3183	M	13	160	55	160	2100	21.4844
3184	M	13	163	47	163	2103	17.6898
3185	M	13	163	47	163	2103	17.6898
3186	M	13	163	47	163	2103	17.6898
3187	M	13	170	47	170	2103.9	16.263
3188	M	13	175	74	175	2106	24.098
3189	M	13	159	47.7	159	2106	18.8679
3190	M	13	169	54	169	2106	18.9069
3191	M	13	170	55	170	2106	19.0311
3192	M	13	175	74	175	2106	24.098
3193	M	13	159	47.7	159	2106	18.8679
3194	M	13	169	54	169	2106	18.9069
3195	M	13	170	55	170	2106	19.0311
3196	M	13	169	54	169	2106	18.9069
3197	M	13	170	55	170	2106	19.0311
3198	M	13	159	47.7	159	2106	18.8679
3199	M	13	146	38.6	146	2106	18.1085
3200	M	13	143	35	143	2110.75	17.1158
3201	M	13	169	50	169	2112	17.5064
3202	M	13	163	49.7	163	2112	18.706
3203	M	13	169	50	169	2112	17.5064
3204	M	13	163	49.7	163	2112	18.706
3205	M	13	163	49.7	163	2112	18.706
3206	M	13	156	45	156	2116	18.4911
3207	M	13	156	45	156	2116	18.4911
3208	M	13	153	42	153	2120	18.07
3209	M	13	153	42	153	2120	18.07
3210	M	13	175	63	175	2124	20.5714
3211	M	13	175	63	175	2124	20.5714
3212	M	13	140	36	140	2124.59	18.3673
3213	M	13	162	59	162	2124.59	22.4813
3214	M	13	150	35	150	2130	15.5556
3215	M	13	157	45	157	2133	18.2563
3216	M	13	157	45	157	2133	18.2563
3217	M	13	157	45	157	2133	18.2563
3218	M	13	154	50	154	2137	21.0828
3219	M	13	154	50	154	2137	21.0828
3220	M	13	154	50	154	2137	21.0828
3221	M	13	155	57.1	155	2140	23.7669
3222	M	13	167	54	167	2144	19.3625
3223	M	13	167	54	167	2144	19.3625
3224	M	13	167	54	167	2144	19.3625
3225	M	13	160	44	160	2145.7	17.1875
3226	M	13	163	54	163	2150	20.3244
3227	M	13	175	74	175	2150	24.1633
3228	M	13	168	48.35	168	2150	17.1308
3229	M	13	146	35	146	2150	16.4196
3230	M	13	167	50	167	2150	17.9282
3231	M	13	163	54	163	2150	20.3244
3232	M	13	175	74	175	2150	24.1633
3233	M	13	168	48.35	168	2150	17.1308
3234	M	13	146	35	146	2150	16.4196
3235	M	13	167	50	167	2150	17.9282
3236	M	13	167	50	167	2150	17.9282
3237	M	13	146	35	146	2150	16.4196
3238	M	13	168	48.35	168	2150	17.1308
3239	M	13	144	34.2	144	2160	16.4931
3240	M	13	163	56.05	163	2160	21.096
3241	M	13	168	61.9	168	2160	21.9317
3242	M	13	151	36.8	151	2160	16.1396
3243	M	13	158	45	158	2160	18.026
3244	M	13	166	54	166	2160	19.5965
3245	M	13	167	60.4	167	2160	21.6573
3246	M	13	168	68	168	2160	24.093
3247	M	13	169	56	169	2160	19.6072
3248	M	13	144	34.2	144	2160	16.4931
3249	M	13	163	56.05	163	2160	21.096
3250	M	13	168	61.9	168	2160	21.9317
3251	M	13	151	36.8	151	2160	16.1396
3252	M	13	158	45	158	2160	18.026
3253	M	13	166	54	166	2160	19.5965
3254	M	13	167	60.4	167	2160	21.6573
3255	M	13	168	68	168	2160	24.093
3256	M	13	169	56	169	2160	19.6072
3257	M	13	166	54	166	2160	19.5965
3258	M	13	169	56	169	2160	19.6072
3259	M	13	168	61.9	168	2160	21.9317
3260	M	13	163	56.05	163	2160	21.096
3261	M	13	168	68	168	2160	24.093
3262	M	13	151	36.8	151	2160	16.1396
3263	M	13	167	60.4	167	2160	21.6573
3264	M	13	144	34.2	144	2160	16.4931
3265	M	13	156	53.8	156	2160	22.1072
3266	M	13	171	57	171	2162	19.4932
3267	M	13	174	57	174	2167.22	18.8268
3268	M	13	157	45	157	2170	18.1752
3269	M	13	157	47	157	2170	19.0677
3270	M	13	160	45	160	2170	17.5781
3271	M	13	160	49	160	2170	19.1406
3272	M	13	165	50	165	2170	18.3655
3273	M	13	157	45	157	2170	18.1752
3274	M	13	157	47	157	2170	19.0677
3275	M	13	160	45	160	2170	17.5781
3276	M	13	160	49	160	2170	19.1406
3277	M	13	165	50	165	2170	18.3655
3278	M	13	157	47	157	2170	19.0677
3279	M	13	160	45	160	2170	17.5781
3280	M	13	160	49	160	2170	19.1406
3281	M	13	165	50	165	2170	18.3655
3282	M	13	163	50	163	2170	18.8189
3283	M	13	172	61	172	2172	20.6193
3284	M	13	172	61	172	2172	20.6193
3285	M	13	172	61	172	2172	20.6193
3286	M	13	159	57	159	2174.5	22.5466
3287	M	13	161	52	161	2175	20.061
3288	M	13	161	52	161	2175	20.061
3289	M	13	161	52	161	2175	20.061
3290	M	13	170	74	170	2180	25.6055
3291	M	13	157	51.7	157	2180	20.9745
3292	M	13	163	62.75	163	2180	23.6178
3293	M	13	158	43	158	2180	17.2248
3294	M	13	170	74	170	2180	25.6055
3295	M	13	157	51.7	157	2180	20.9745
3296	M	13	163	62.75	163	2180	23.6178
3297	M	13	158	43	158	2180	17.2248
3298	M	13	163	62.75	163	2180	23.6178
3299	M	13	157	51.7	157	2180	20.9745
3300	M	13	158	43	158	2180	17.2248
3301	M	13	165	48	165	2182	17.7012
3302	M	13	165	48	165	2182	17.7012
3303	M	13	163	57	163	2183	21.4536
3304	M	13	163	57	163	2183	21.4536
3305	M	13	163	57	163	2183	21.4536
3306	M	13	158	41	158	2184	16.4237
3307	M	13	162	52	162	2185	19.8141
3308	M	13	174	65	174	2185	21.4692
3309	M	13	162	52	162	2185	19.8141
3310	M	13	174	65	174	2185	21.4692
3311	M	13	162	52	162	2185	19.8141
3312	M	13	174	65	174	2185	21.4692
3313	M	13	156	46.3	156	2187	19.0253
3314	M	13	156	46.3	156	2187	19.0253
3315	M	13	156	46.3	156	2187	19.0253
3316	M	13	167	59	167	2190	21.1553
3317	M	13	167	59	167	2190	21.1553
3318	M	13	159	43	159	2190	17.0088
3319	M	13	167	59	167	2190	21.1553
3320	M	13	159	55	159	2195	21.7555
3321	M	13	159	55	159	2195	21.7555
3322	M	13	159	55	159	2195	21.7555
3323	M	13	158	43.6	158	2196	17.4651
3324	M	13	158	43.6	158	2196	17.4651
3325	M	13	158	43.6	158	2196	17.4651
3326	M	13	167	53	167	2196.61	19.0039
3327	M	13	165	60	165	2196.61	22.0386
3328	M	13	158	60	158	2196.61	24.0346
3329	M	13	153	48	153	2198	20.5049
3330	M	13	153	48	153	2198	20.5049
3331	M	13	153	48	153	2198	20.5049
3332	M	13	145	38	145	2200	18.0737
3333	M	13	158	48	158	2200	19.2277
3334	M	13	145	38	145	2200	18.0737
3335	M	13	158	48	158	2200	19.2277
3336	M	13	145	38	145	2200	18.0737
3337	M	13	158	48	158	2200	19.2277
3338	M	13	157	51	157	2201	20.6905
3339	M	13	157	51	157	2201	20.6905
3340	M	13	157	51	157	2201	20.6905
3341	M	13	169	62	169	2203	21.7079
3342	M	13	169	62	169	2203	21.7079
3343	M	13	169	62	169	2203	21.7079
3344	M	13	158	38	158	2204.08	15.2219
3345	M	13	182	59	182	2204.08	17.8119
3346	M	13	153	50	153	2205	21.3593
3347	M	13	153	50	153	2205	21.3593
3348	M	13	174	51	174	2208	16.845
3349	M	13	165	39	165	2208	14.3251
3350	M	13	174	51	174	2208	16.845
3351	M	13	165	39	165	2208	14.3251
3352	M	13	174	51	174	2208	16.845
3353	M	13	159	42	159	2210	16.6133
3354	M	13	167	53	167	2210	19.0039
3355	M	13	159	42	159	2210	16.6133
3356	M	13	167	53	167	2210	19.0039
3357	M	13	150	41	150	2210	18.2222
3358	M	13	159	42	159	2210	16.6133
3359	M	13	167	53	167	2210	19.0039
3360	M	13	155	42	155	2211.6	17.4818
3361	M	13	168	58	168	2213	20.5499
3362	M	13	168	58	168	2213	20.5499
3363	M	13	168	58	168	2213	20.5499
3364	M	13	149	41	149	2214	18.4676
3365	M	13	162	53	162	2214	20.1951
3366	M	13	162	66	162	2214	25.1486
3367	M	13	162	51	162	2214	19.433
3368	M	13	165	55	165	2214	20.202
3369	M	13	167	50	167	2214	17.9282
3370	M	13	149	41	149	2214	18.4676
3371	M	13	162	53	162	2214	20.1951
3372	M	13	162	66	162	2214	25.1486
3373	M	13	162	51	162	2214	19.433
3374	M	13	165	55	165	2214	20.202
3375	M	13	167	50	167	2214	17.9282
3376	M	13	165	55	165	2214	20.202
3377	M	13	167	50	167	2214	17.9282
3378	M	13	162	51	162	2214	19.433
3379	M	13	149	41	149	2214	18.4676
3380	M	13	162	66	162	2214	25.1486
3381	M	13	162	53	162	2214	20.1951
3382	M	13	157	37.4	157	2214	15.173
3383	M	13	160	52	160	2215	20.3125
3384	M	13	160	52	160	2215	20.3125
3385	M	13	160	52	160	2215	20.3125
3386	M	13	159	48.3	159	2217	19.1053
3387	M	13	159	48.3	159	2217	19.1053
3388	M	13	159	48.3	159	2217	19.1053
3389	M	13	161	51.3	161	2218	19.7909
3390	M	13	161	51.3	161	2218	19.7909
3391	M	13	161	51.3	161	2218	19.7909
3392	M	13	158	43	158	2219.18	17.2248
3393	M	13	152	43	152	2220	18.6115
3394	M	13	158	51	158	2220	20.4294
3395	M	13	160	53	160	2220	20.7031
3396	M	13	168	64	168	2220	22.6757
3397	M	13	169	68	169	2220	23.8087
3398	M	13	152	43	152	2220	18.6115
3399	M	13	158	51	158	2220	20.4294
3400	M	13	160	53	160	2220	20.7031
3401	M	13	168	64	168	2220	22.6757
3402	M	13	169	68	169	2220	23.8087
3403	M	13	168	64	168	2220	22.6757
3404	M	13	169	68	169	2220	23.8087
3405	M	13	169	61.7	169	2223	21.6029
3406	M	13	169	61.7	169	2223	21.6029
3407	M	13	169	61.7	169	2223	21.6029
3408	M	13	186	84	186	2224	24.2803
3409	M	13	186	84	186	2224	24.2803
3410	M	13	171	51	171	2225	17.6125
3411	M	13	170.5	51.2	170.5	2225	17.6125
3412	M	13	172	56	172	2225	18.9292
3413	M	13	171	51	171	2225	17.6125
3414	M	13	170.5	51.2	170.5	2225	17.6125
3415	M	13	172	56	172	2225	18.9292
3416	M	13	172	56	172	2225	18.9292
3417	M	13	154	35	154	2230	14.758
3418	M	13	154	35	154	2230	14.758
3419	M	13	165	44	165	2232	15.978
3420	M	13	156	49.2	156	2232	20.217
3421	M	13	173	71.3	173	2232	23.823
3422	M	13	162	42	162	2232	16.0037
3423	M	13	165	44	165	2232	15.978
3424	M	13	156	49.2	156	2232	20.217
3425	M	13	173	71.3	173	2232	23.823
3426	M	13	156	49.2	156	2232	20.217
3427	M	13	173	71.3	173	2232	23.823
3428	M	13	162	42	162	2232	16.0037
3429	M	13	151	44.9	151	2240	19.6921
3430	M	13	151	44.9	151	2240	19.6921
3431	M	13	174	63	174	2240	20.8086
3432	M	13	174	44	174	2240	14.533
3433	M	13	151	44.9	151	2240	19.6921
3434	M	13	173	63	173	2240	21.0498
3435	M	13	169	56	169	2241	19.6072
3436	M	13	182	64.7	182	2241	19.5327
3437	M	13	169	56	169	2241	19.6072
3438	M	13	182	64.7	182	2241	19.5327
3439	M	13	169	56	169	2241	19.6072
3440	M	13	182	64.7	182	2241	19.5327
3441	M	13	177.5	59.6	177.5	2249	18.9169
3442	M	13	177.5	59.6	177.5	2249	18.9169
3443	M	13	177.5	59.6	177.5	2249	18.9169
3444	M	13	170	54.8	170	2250	18.9619
3445	M	13	172	59	172	2250	19.9432
3446	M	13	171	45	171	2250	15.3894
3447	M	13	170	54.8	170	2250	18.9619
3448	M	13	172	59	172	2250	19.9432
3449	M	13	170	54.8	170	2250	18.9619
3450	M	13	172	59	172	2250	19.9432
3451	M	13	164	47	164	2252	17.4747
3452	M	13	164	47	164	2252	17.4747
3453	M	13	164	47	164	2252	17.4747
3454	M	13	153	40	153	2253	17.0874
3455	M	13	166	52	166	2257.84	18.8707
3456	M	13	157	51	157	2257.84	20.6905
3457	M	13	154	50	154	2258	21.0828
3458	M	13	175	57.5	175	2260	18.7755
3459	M	13	175	57.5	175	2260	18.7755
3460	M	13	158	48	158	2260	19.2277
3461	M	13	175	57.5	175	2260	18.7755
3462	M	13	167	54	167	2261	19.3625
3463	M	13	170	62	170	2264	21.4533
3464	M	13	170	62	170	2264	21.4533
3465	M	13	170	62	170	2264	21.4533
3466	M	13	164	53	164	2265	19.7055
3467	M	13	150	40.1	150	2265	17.8222
3468	M	13	164	53	164	2265	19.7055
3469	M	13	150	40.1	150	2265	17.8222
3470	M	13	150	40.1	150	2265	17.8222
3471	M	13	169	57	169	2265.73	19.9573
3472	M	13	149	37	149	2268	16.6659
3473	M	13	166	63	166	2268	22.8625
3474	M	13	149	37	149	2268	16.6659
3475	M	13	166	63	166	2268	22.8625
3476	M	13	166	63	166	2268	22.8625
3477	M	13	164	46	164	2268	17.1029
3478	M	13	157	43	157	2268	17.4449
3479	M	13	184	60.4	184	2268	17.8403
3480	M	13	149	37	149	2268	16.6659
3481	M	13	157	44	157	2270	17.8506
3482	M	13	161	52	161	2270	20.061
3483	M	13	157	44	157	2270	17.8506
3484	M	13	161	52	161	2270	20.061
3485	M	13	161	52	161	2270	20.061
3486	M	13	157	44	157	2270	17.8506
3487	M	13	163	51	163	2272	19.1953
3488	M	13	163	51	163	2272	19.1953
3489	M	13	163	51	163	2272	19.1953
3490	M	13	160	59	160	2273.68	23.0469
3491	M	13	164	46	164	2275	17.1029
3492	M	13	164	45	164	2275	16.7311
3493	M	13	169	49	169	2275	17.1563
3494	M	13	146	34	146	2275	15.9505
3495	M	13	155	37	155	2275	15.4006
3496	M	13	164	46	164	2275	17.1029
3497	M	13	164	45	164	2275	16.7311
3498	M	13	169	49	169	2275	17.1563
3499	M	13	146	34	146	2275	15.9505
3500	M	13	155	37	155	2275	15.4006
3501	M	13	169	49	169	2275	17.1563
3502	M	13	164	46	164	2275	17.1029
3503	M	13	164	45	164	2275	16.7311
3504	M	13	150	42	150	2277	18.6667
3505	M	13	156	45	156	2277	18.4911
3506	M	13	162	50	162	2279	19.052
3507	M	13	162	50	162	2279	19.052
3508	M	13	162	50	162	2279	19.052
3509	M	13	184	81	184	2280	23.9249
3510	M	13	184	81	184	2280	23.9249
3511	M	13	184	81	184	2280	23.9249
3512	M	13	152	40	152	2280	17.313
3513	M	13	176	76.1	176	2283	24.5674
3514	M	13	176	76.1	176	2283	24.5674
3515	M	13	176	76.1	176	2283	24.5674
3516	M	13	155	49	155	2284	20.3954
3517	M	13	155	49	155	2284	20.3954
3518	M	13	155	49	155	2284	20.3954
3519	M	13	173	53	173	2289	17.7086
3520	M	13	173	53	173	2289	17.7086
3521	M	13	173	53	173	2289	17.7086
3522	M	13	170	61	170	2289.75	21.1073
3523	M	13	148	38.1	148	2290	17.3941
3524	M	13	148	38.1	148	2290	17.3941
3525	M	13	148	38.1	148	2290	17.3941
3526	M	13	178	64	178	2294	20.1995
3527	M	13	178	64	178	2294	20.1995
3528	M	13	178	64	178	2294	20.1995
3529	M	13	166	60	166	2295	21.7738
3530	M	13	167	61	167	2295	21.8724
3531	M	13	166	60	166	2295	21.7738
3532	M	13	167	61	167	2295	21.8724
3533	M	13	166	60	166	2295	21.7738
3534	M	13	167	61	167	2295	21.8724
3535	M	13	170	51	170	2297.87	17.6471
3536	M	13	157	53	157	2300	21.5019
3537	M	13	159	54	159	2300	21.3599
3538	M	13	178	72	178	2300	22.7875
3539	M	13	162	50	162	2300	19.052
3540	M	13	167	56	167	2300	20.0796
3541	M	13	157	53	157	2300	21.5019
3542	M	13	159	54	159	2300	21.3599
3543	M	13	178	72	178	2300	22.7875
3544	M	13	162	50	162	2300	19.052
3545	M	13	167	56	167	2300	20.0796
3546	M	13	150	38	150	2300	16.8889
3547	M	13	165	57	165	2300	20.9366
3548	M	13	167	56	167	2300	20.0796
3549	M	13	166	53.8	166	2302	19.5239
3550	M	13	166	53.8	166	2302	19.5239
3551	M	13	166	53.8	166	2302	19.5239
3552	M	13	154	43	154	2306.05	18.1312
3553	M	13	171	69	171	2310	23.597
3554	M	13	171	69	171	2310	23.597
3555	M	13	163	44	163	2310	16.5607
3556	M	13	169	55	169	2312	19.257
3557	M	13	169	55	169	2312	19.257
3558	M	13	169	55	169	2312	19.257
3559	M	13	163	56	163	2315	20.9643
3560	M	13	162	43	162	2315	16.3847
3561	M	13	163	56	163	2315	20.9643
3562	M	13	162	43	162	2315	16.3847
3563	M	13	162	43	162	2315	16.3847
3564	M	13	166	52	166	2320	18.8707
3565	M	13	169	58	169	2320	20.3074
3566	M	13	166	52	166	2320	18.8707
3567	M	13	169	58	169	2320	20.3074
3568	M	13	169	58	169	2320	20.3074
3569	M	13	151	41.8	151	2321	18.3325
3570	M	13	166	54.9	166	2321	19.9231
3571	M	13	151	41.8	151	2321	18.3325
3572	M	13	166	54.9	166	2321	19.9231
3573	M	13	166	54.9	166	2321	19.9231
3574	M	13	151	41.8	151	2321	18.3325
3575	M	13	178	58.1	178	2322	18.3373
3576	M	13	141	41	141	2322	20.6227
3577	M	13	163	52	163	2322	19.5717
3578	M	13	178	58.1	178	2322	18.3373
3579	M	13	141	41	141	2322	20.6227
3580	M	13	163	52	163	2322	19.5717
3581	M	13	163	52	163	2322	19.5717
3582	M	13	141	41	141	2322	20.6227
3583	M	13	178	58.1	178	2322	18.3373
3584	M	13	161	61	161	2322.58	23.533
3585	M	13	165	48	165	2325	17.6309
3586	M	13	165	48	165	2325	17.6309
3587	M	13	165	48	165	2325	17.6309
3588	M	13	149	37	149	2330	16.6659
3589	M	13	167	55	167	2330.94	19.721
3590	M	13	163	58	163	2330.94	21.83
3591	M	13	153	38.5	153	2331	16.4467
3592	M	13	177	78	177	2333	24.8971
3593	M	13	177	78	177	2333	24.8971
3594	M	13	177	78	177	2333	24.8971
3595	M	13	160	54	160	2334	21.0938
3596	M	13	160	54	160	2334	21.0938
3597	M	13	160	54	160	2334	21.0938
3598	M	13	152	39	152	2339.35	16.8802
3599	M	13	146	45	146	2340	21.1109
3600	M	13	146	45	146	2340	21.1109
3601	M	13	160	63	160	2350	24.6094
3602	M	13	162	41	162	2350	15.6226
3603	M	13	160	63	160	2350	24.6094
3604	M	13	160	63	160	2350	24.6094
3605	M	13	162	41	162	2350	15.6226
3606	M	13	155	49.2	155	2355	20.4787
3607	M	13	155	49.2	155	2355	20.4787
3608	M	13	155	49.2	155	2355	20.4787
3609	M	13	168	40	168	2356.36	14.1723
3610	M	13	163	44	163	2356.36	16.5607
3611	M	13	178	59	178	2356.36	18.6214
3612	M	13	164	57	164	2356.36	21.1927
3613	M	13	156	54	156	2364.96	22.1893
3614	M	13	170	57	170	2366	19.7232
3615	M	13	170	57	170	2366	19.7232
3616	M	13	170	57	170	2366	19.7232
3617	M	13	157	51	157	2372	20.6905
3618	M	13	159	44	159	2372	17.4044
3619	M	13	157	51	157	2372	20.6905
3620	M	13	159	44	159	2372	17.4044
3621	M	13	159	44	159	2372	17.4044
3622	M	13	157	51	157	2372	20.6905
3623	M	13	163	53	163	2373.63	19.9481
3624	M	13	161	46	161	2375	17.7462
3625	M	13	143	47	143	2375	22.984
3626	M	13	161	46	161	2375	17.7462
3627	M	13	143	47	143	2375	22.984
3628	M	13	161	46	161	2375	17.7462
3629	M	13	143	47	143	2375	22.984
3630	M	13	159	50	159	2376	19.7777
3631	M	13	176	55	176	2376	17.7557
3632	M	13	159	50	159	2376	19.7777
3633	M	13	176	55	176	2376	17.7557
3634	M	13	176	55	176	2376	17.7557
3635	M	13	159	50	159	2376	19.7777
3636	M	13	173	47	173	2378	15.7038
3637	M	13	173	47	173	2378	15.7038
3638	M	13	149	41	149	2380	18.4676
3639	M	13	149	41	149	2380	18.4676
3640	M	13	168	53	168	2380	18.7783
3641	M	13	163	58	163	2384	22.0402
3642	M	13	163	58	163	2384	22.0402
3643	M	13	172	60	172	2388	20.2812
3644	M	13	172	60	172	2388	20.2812
3645	M	13	172	60	172	2388	20.2812
3646	M	13	156	40	156	2390	16.4366
3647	M	13	156	40	156	2390	16.4366
3648	M	13	158	47.4	158	2396	18.9873
3649	M	13	158	47.4	158	2396	18.9873
3650	M	13	158	47.4	158	2396	18.9873
3651	M	13	160	43.5	160	2396	16.9922
3652	M	13	172	63.2	172	2397	21.3629
3653	M	13	172	63.2	172	2397	21.3629
3654	M	13	172	63.2	172	2397	21.3629
3655	M	13	175	55	175	2399	17.9592
3656	M	13	175	55	175	2399	17.9592
3657	M	13	175	55	175	2399	17.9592
3658	M	13	165	51	165	2400	18.7328
3659	M	13	158	52	158	2400	20.9101
3660	M	13	147	39	147	2400	18.048
3661	M	13	161	50	161	2400	19.2894
3662	M	13	162	59	162	2400	22.4813
3663	M	13	169	57.7	169	2400	20.2024
3664	M	13	148	37	148	2400	16.8919
3665	M	13	156	38.5	156	2400	15.8202
3666	M	13	165	51	165	2400	18.7328
3667	M	13	158	52	158	2400	20.9101
3668	M	13	147	39	147	2400	18.048
3669	M	13	161	50	161	2400	19.2894
3670	M	13	162	59	162	2400	22.4813
3671	M	13	169	57.7	169	2400	20.2024
3672	M	13	148	37	148	2400	16.8919
3673	M	13	163	51	163	2400	19.1953
3674	M	13	156	38.5	156	2400	15.8202
3675	M	13	148	37	148	2400	16.8919
3676	M	13	157	47	157	2400	19.0677
3677	M	13	151.5	48.3	151.5	2402	21.0437
3678	M	13	169.5	58.2	169.5	2402	20.2574
3679	M	13	151.5	48.3	151.5	2402	21.0437
3680	M	13	169.5	58.2	169.5	2402	20.2574
3681	M	13	151.5	48.3	151.5	2402	21.0437
3682	M	13	169.5	58.2	169.5	2402	20.2574
3683	M	13	155	40	155	2403	16.6493
3684	M	13	155	40	155	2403	16.6493
3685	M	13	155	40	155	2403	16.6493
3686	M	13	168	63	168	2405	22.3214
3687	M	13	170	58	170	2405	20.0692
3688	M	13	176	62	176	2405	20.0155
3689	M	13	168	63	168	2405	22.3214
3690	M	13	170	58	170	2405	20.0692
3691	M	13	176	62	176	2405	20.0155
3692	M	13	170	58	170	2405	20.0692
3693	M	13	168	50	168	2405	17.7154
3694	M	13	168	63	168	2405	22.3214
3695	M	13	176	62	176	2405	20.0155
3696	M	13	168	53	168	2406	18.7783
3697	M	13	168	53	168	2406	18.7783
3698	M	13	168	53	168	2406	18.7783
3699	M	13	161	55	161	2408	21.2183
3700	M	13	161	55	161	2408	21.2183
3701	M	13	161	55	161	2408	21.2183
3702	M	13	158	59	158	2408.92	23.634
3703	M	13	162	48.35	162	2410	18.4233
3704	M	13	149	47	149	2410	21.1702
3705	M	13	150	40	150	2410	17.7778
3706	M	13	162	48.35	162	2410	18.4233
3707	M	13	149	47	149	2410	21.1702
3708	M	13	150	40	150	2410	17.7778
3709	M	13	162	48.35	162	2410	18.4233
3710	M	13	149	47	149	2410	21.1702
3711	M	13	150	40	150	2410	17.7778
3712	M	13	166	59	166	2412	21.3021
3713	M	13	166	59	166	2412	21.3021
3714	M	13	150	40	150	2413	17.7778
3715	M	13	156	46	156	2413	18.902
3716	M	13	150	40	150	2413	17.7778
3717	M	13	156	46	156	2413	18.902
3718	M	13	150	40	150	2413	17.7778
3719	M	13	156	46	156	2413	18.902
3720	M	13	161	52	161	2415	20.061
3721	M	13	161	52	161	2415	20.061
3722	M	13	161	52	161	2415	20.061
3723	M	13	162	50	162	2417.91	19.052
3724	M	13	155	40	155	2420	16.6493
3725	M	13	155	40	155	2420	16.6493
3726	M	13	150	39	150	2430	17.5111
3727	M	13	164	52	164	2430	19.1478
3728	M	13	167	62	167	2430	22.1234
3729	M	13	170	64	170	2430	22.1453
3730	M	13	150	39	150	2430	17.5111
3731	M	13	164	52	164	2430	19.1478
3732	M	13	167	62	167	2430	22.1234
3733	M	13	170	64	170	2430	22.1453
3734	M	13	170	64	170	2430	22.1453
3735	M	13	148	36	148	2430	16.4354
3736	M	13	171	54	171	2433	18.4672
3737	M	13	171	54	171	2433	18.4672
3738	M	13	162	64.3	162	2438	24.5008
3739	M	13	162	64.3	162	2438	24.5008
3740	M	13	162	64.3	162	2438	24.5008
3741	M	13	164	45.7	164	2441	16.9914
3742	M	13	164	45.7	164	2441	16.9914
3743	M	13	164	45.7	164	2441	16.9914
3744	M	13	178	74.1	178	2448	23.3872
3745	M	13	178	74.1	178	2448	23.3872
3746	M	13	178	74.1	178	2448	23.3872
3747	M	13	167	49	167	2449	17.5697
3748	M	13	167	49	167	2449	17.5697
3749	M	13	167	49	167	2449	17.5697
3750	M	13	171	45	171	2450	15.3894
3751	M	13	168	56	168	2450	19.8413
3752	M	13	154	41	154	2453	17.2879
3753	M	13	154	41	154	2453	17.2879
3754	M	13	154	41	154	2453	17.2879
3755	M	13	160	51	160	2454.55	19.9219
3756	M	13	163	58	163	2455	21.83
3757	M	13	163	58	163	2455	21.83
3758	M	13	163	58	163	2455	21.83
3759	M	13	168	53	168	2456	18.7783
3760	M	13	168	53	168	2456	18.7783
3761	M	13	168	53	168	2456	18.7783
3762	M	13	148	45.2	148	2457	20.6355
3763	M	13	148	45.2	148	2457	20.6355
3764	M	13	148	45.2	148	2457	20.6355
3765	M	13	160	44	160	2458	17.1875
3766	M	13	150	32	150	2458	14.2222
3767	M	13	160	44	160	2458	17.1875
3768	M	13	160	44	160	2458	17.1875
3769	M	13	150	32	150	2458	14.2222
3770	M	13	163	49	163	2460	18.4425
3771	M	13	163	49	163	2460	18.4425
3772	M	13	164	47	164	2462	17.4747
3773	M	13	152	47	152	2463.88	20.3428
3774	M	13	153	38	153	2466	16.4039
3775	M	13	153	38	153	2466	16.4039
3776	M	13	157	47	157	2470	19.0677
3777	M	13	163	46.5	163	2470	17.5016
3778	M	13	157	47	157	2470	19.0677
3779	M	13	163	46.5	163	2470	17.5016
3780	M	13	163	46.5	163	2470	17.5016
3781	M	13	157	47	157	2470	19.0677
3782	M	13	168	60	168	2475	21.0813
3783	M	13	168	59.5	168	2475	21.0813
3784	M	13	148	39	148	2475	17.805
3785	M	13	154	45	154	2475	18.9745
3786	M	13	168	60	168	2475	21.0813
3787	M	13	168	59.5	168	2475	21.0813
3788	M	13	148	39	148	2475	17.805
3789	M	13	154	45	154	2475	18.9745
3790	M	13	154	45	154	2475	18.9745
3791	M	13	158	41	158	2476	16.4237
3792	M	13	158	41	158	2476	16.4237
3793	M	13	158	41	158	2476	16.4237
3794	M	13	162	60	162	2477	22.8624
3795	M	13	169	56	169	2477	19.6072
3796	M	13	162	60	162	2477	22.8624
3797	M	13	169	56	169	2477	19.6072
3798	M	13	162	60	162	2477	22.8624
3799	M	13	169	56	169	2477	19.6072
3800	M	13	173	55	173	2480	18.3768
3801	M	13	173	55	173	2480	18.3768
3802	M	13	173	55	173	2480	18.3768
3803	M	13	154	50	154	2488	21.0828
3804	M	13	154	50	154	2488	21.0828
3805	M	13	154	50	154	2488	21.0828
3806	M	13	155	34	155	2492.31	14.1519
3807	M	13	166	52.8	166	2496	19.161
3808	M	13	161	58.8	161	2496	22.6843
3809	M	13	166	52.8	166	2496	19.161
3810	M	13	161	58.8	161	2496	22.6843
3811	M	13	161	58.8	161	2496	22.6843
3812	M	13	166	52.8	166	2496	19.161
3813	M	13	169	57	169	2500	19.9573
3814	M	13	169	57	169	2500	19.9573
3815	M	13	169	57	169	2500	19.9573
3816	M	13	169	45	169	2501.93	15.7558
3817	M	13	168	53	168	2501.93	18.7783
3818	M	13	153	40	153	2505	17.0874
3819	M	13	156	42	156	2505	17.2584
3820	M	13	153	40	153	2505	17.0874
3821	M	13	156	42	156	2505	17.2584
3822	M	13	156	42	156	2505	17.2584
3823	M	13	164	54.2	164	2511	20.1517
3824	M	13	164	54.2	164	2511	20.1517
3825	M	13	164	54.2	164	2511	20.1517
3826	M	13	162	44	162	2511.63	16.7657
3827	M	13	164	57	164	2521.4	21.1927
3828	M	13	157	51.3	157	2530	20.8122
3829	M	13	157	51.3	157	2530	20.8122
3830	M	13	157	51.3	157	2530	20.8122
3831	M	13	147	40	147	2535	18.5108
3832	M	13	147	40	147	2535	18.5108
3833	M	13	147	40	147	2535	18.5108
3834	M	13	147	37.5	147	2538	17.3539
3835	M	13	170	63	170	2538	21.7993
3836	M	13	147	37.5	147	2538	17.3539
3837	M	13	170	63	170	2538	21.7993
3838	M	13	170	63	170	2538	21.7993
3839	M	13	147	37.5	147	2538	17.3539
3840	M	13	172	57	172	2539	19.2672
3841	M	13	172	57	172	2539	19.2672
3842	M	13	172	57	172	2539	19.2672
3843	M	13	163	53	163	2540	19.9481
3844	M	13	150	41	150	2541.18	18.2222
3845	M	13	163	50	163	2560	18.6307
3846	M	13	164	55	164	2560	20.2632
3847	M	13	154	46	154	2560	19.3962
3848	M	13	163	50	163	2560	18.6307
3849	M	13	164	55	164	2560	20.2632
3850	M	13	154	46	154	2560	19.3962
3851	M	13	176	63	176	2560	20.3383
3852	M	13	154	46	154	2560	19.3962
3853	M	13	166	58	166	2560	21.048
3854	M	13	166	57	166	2560	20.6852
3855	M	13	165	50	165	2562	18.3655
3856	M	13	165	50	165	2562	18.3655
3857	M	13	168	54.2	168	2564	19.2035
3858	M	13	168	54.2	168	2564	19.2035
3859	M	13	168	54.2	168	2564	19.2035
3860	M	13	158	46	158	2567	18.4265
3861	M	13	158	46	158	2567	18.4265
3862	M	13	158	46	158	2567	18.4265
3863	M	13	161	47	161	2571.43	18.132
3864	M	13	169	53	169	2572	18.5568
3865	M	13	169	53	169	2572	18.5568
3866	M	13	158	42.8	158	2574	17.1447
3867	M	13	158	42.8	158	2574	17.1447
3868	M	13	158	42.8	158	2574	17.1447
3869	M	13	173	62	173	2575	20.7157
3870	M	13	173	62	173	2575	20.7157
3871	M	13	173	62	173	2575	20.7157
3872	M	13	150	36.5	150	2581.67	16.2222
3873	M	13	168.5	45.5	168.5	2591	16.0255
3874	M	13	168.5	45.5	168.5	2591	16.0255
3875	M	13	168.5	45.5	168.5	2591	16.0255
3876	M	13	159	48	159	2592	19.1053
3877	M	13	159	48	159	2592	19.1053
3878	M	13	147	45	147	2594	20.8247
3879	M	13	147	45	147	2594	20.8247
3880	M	13	147	45	147	2594	20.8247
3881	M	13	155	44.7	155	2600	18.6056
3882	M	13	164	46	164	2600	17.1029
3883	M	13	155	44.7	155	2600	18.6056
3884	M	13	164	46	164	2600	17.1029
3885	M	13	155	44.7	155	2600	18.6056
3886	M	13	164	46	164	2600	17.1029
3887	M	13	160	48	160	2601	18.75
3888	M	13	157	42	157	2602.41	17.0392
3889	M	13	147	42	147	2610	19.4363
3890	M	13	147	42	147	2610	19.4363
3891	M	13	155	47	155	2615	19.563
3892	M	13	155	47	155	2615	19.563
3893	M	13	155	47	155	2615	19.563
3894	M	13	152	38	152	2623.48	16.4474
3895	M	13	165	51	165	2623.48	18.7328
3896	M	13	161	50	161	2623.48	19.2894
3897	M	13	167	60	167	2630	21.5139
3898	M	13	172	53	172	2634.15	17.9151
3899	M	13	153	43.5	153	2640	18.5826
3900	M	13	153	43.5	153	2640	18.5826
3901	M	13	153	43.5	153	2640	18.5826
3902	M	13	149	37.6	149	2650	16.9362
3903	M	13	160	47	160	2650	18.3594
3904	M	13	149	37.6	149	2650	16.9362
3905	M	13	160	47	160	2650	18.3594
3906	M	13	149	37.6	149	2650	16.9362
3907	M	13	160	47	160	2650	18.3594
3908	M	13	172	61	172	2661	20.5516
3909	M	13	172	61	172	2661	20.5516
3910	M	13	155	43	155	2666	17.898
3911	M	13	155	43	155	2666	17.898
3912	M	13	155	43	155	2666	17.898
3913	M	13	151	41	151	2666	17.9817
3914	M	13	166	43	166	2666.67	15.6046
3915	M	13	163	52	163	2670	19.5717
3916	M	13	163	52	163	2670	19.5717
3917	M	13	149	34.5	149	2672	15.5398
3918	M	13	149	34.5	149	2672	15.5398
3919	M	13	157	41	157	2677.69	16.6335
3920	M	13	160	49.6	160	2691	19.375
3921	M	13	160	49.6	160	2691	19.375
3922	M	13	160	49.6	160	2691	19.375
3923	M	13	154	38.5	154	2694	16.2338
3924	M	13	154	38.5	154	2694	16.2338
3925	M	13	154	38.5	154	2694	16.2338
3926	M	13	163	41	163	2694	15.4315
3927	M	13	158	43	158	2700	17.2248
3928	M	13	179	63	179	2700	19.6623
3929	M	13	162	54	162	2700	20.5761
3930	M	13	168	58.5	168	2710	20.727
3931	M	13	168	58.5	168	2710	20.727
3932	M	13	168	58.5	168	2710	20.727
3933	M	13	168	59	168	2715	21.0648
3934	M	13	167.5	59.1	167.5	2715	21.0648
3935	M	13	168	59	168	2715	21.0648
3936	M	13	167.5	59.1	167.5	2715	21.0648
3937	M	13	174	62	174	2720	20.3131
3938	M	13	174	61.5	174	2720	20.3131
3939	M	13	174	62	174	2720	20.3131
3940	M	13	174	61.5	174	2720	20.3131
3941	M	13	160	41	160	2722.69	16.0156
3942	M	13	174	53	174	2722.69	17.5056
3943	M	13	154	44	154	2731	18.5529
3944	M	13	169	59	169	2734.18	20.6575
3945	M	13	152	40	152	2754	17.3563
3946	M	13	157	48	157	2754	19.4734
3947	M	13	161	44	161	2754	16.9747
3948	M	13	152	40	152	2754	17.3563
3949	M	13	157	48	157	2754	19.4734
3950	M	13	161	44	161	2754	16.9747
3951	M	13	161	44	161	2754	16.9747
3952	M	13	157	48	157	2754	19.4734
3953	M	13	171	50	171	2769.23	17.0993
3954	M	13	165	50.5	165	2790	18.5491
3955	M	13	165	50.5	165	2790	18.5491
3956	M	13	165	50.5	165	2790	18.5491
3957	M	13	150	38	150	2800	16.8889
3958	M	13	167	46	167	2800	16.494
3959	M	13	150	38	150	2800	16.8889
3960	M	13	167	46	167	2800	16.494
3961	M	13	176	57	176	2814	18.4013
3962	M	13	176	57	176	2814	18.4013
3963	M	13	176	57	176	2814	18.4013
3964	M	13	155	38.6	155	2820	16.0666
3965	M	13	166	49	166	2820	17.782
3966	M	13	155	38.6	155	2820	16.0666
3967	M	13	166	49	166	2820	17.782
3968	M	13	155	38.6	155	2820	16.0666
3969	M	13	166	49	166	2820	17.782
3970	M	13	161	47.4	161	2828	18.2863
3971	M	13	166	59.8	166	2828	21.7013
3972	M	13	161	47.4	161	2828	18.2863
3973	M	13	166	59.8	166	2828	21.7013
3974	M	13	166	59.8	166	2828	21.7013
3975	M	13	161	47.4	161	2828	18.2863
3976	M	13	152	38	152	2854.63	16.4474
3977	M	13	160	51	160	2854.63	19.9219
3978	M	13	164	55.5	164	2854.63	20.635
3979	M	13	171	47	171	2863	16.0733
3980	M	13	171	47	171	2863	16.0733
3981	M	13	171	47	171	2863	16.0733
3982	M	13	155	47.5	155	2868	19.7711
3983	M	13	155	47.5	155	2868	19.7711
3984	M	13	155	47.5	155	2868	19.7711
3985	M	13	160	46	160	2916	17.9688
3986	M	13	168	48	168	2916	17.0068
3987	M	13	160	40	160	2916	15.625
3988	M	13	160	46	160	2916	17.9688
3989	M	13	168	48	168	2916	17.0068
3990	M	13	168	48	168	2916	17.0068
3991	M	13	160	40	160	2916	15.625
3992	M	13	160	46	160	2916	17.9688
3993	M	13	154	41	154	2918.92	17.2879
3994	M	13	161	47.8	161	2925	18.4406
3995	M	13	161	47.8	161	2925	18.4406
3996	M	13	161	47.8	161	2925	18.4406
3997	M	13	160	42	160	2938	16.4062
3998	M	13	160	42	160	2938	16.4062
3999	M	13	160	42	160	2938	16.4062
4000	M	13	152	41	152	2950	17.7458
4001	M	13	152	41	152	2950	17.7458
4002	M	13	152	41	152	2950	17.7458
4003	M	13	159	46	159	2972.48	18.1955
4004	M	13	156	46	156	2990	18.902
4005	M	13	156	46	156	2990	18.902
4006	M	13	156	46	156	2990	18.902
4007	M	13	180	72	180	3003	22.2222
4008	M	13	180	72	180	3003	22.2222
4009	M	13	180	72	180	3003	22.2222
4010	M	13	140	35	140	3010	17.8571
4011	M	13	140	35	140	3010	17.8571
4012	M	13	140	35	140	3010	17.8571
4013	M	13	151	39	151	3013	17.1045
4014	M	13	158	55	158	3056.6	22.0317
4015	M	13	162	47	162	3200	17.9089
4016	M	13	162	47	162	3200	17.9089
4017	M	13	164	54	164	3200	20.0773

## Sheet: regressione m13
SUMMARY OUTPUT
Regression Statistics
Multiple R	0.389002
R Square	0.151323
Adjusted R Square	0.150103
Standard Error	330.553
Observations	1394
ANOVA
	df	SS	MS	F	Significance F
Regression	2	2.71001e+07	1.355e+07	124.011	2.75706e-50
Residual	1391	1.51988e+08	109265
Total	1393	1.79088e+08
	Coefficients	Standard Error	t Stat	P-value	Lower 95%	Upper 95%	Lower 95,0%	Upper 95,0%
Intercept	1070.39	200.565	5.33688	1.10286e-07	676.949	1463.83	676.949	1463.83
M (kg)	-16.8105	1.08271	-15.5263	2.94342e-50	-18.9344	-14.6866	-18.9344	-14.6866
H (cm)	12.255	1.44561	8.47745	5.79057e-17	9.41925	15.0909	9.41925	15.0909

## Sheet: m14
ID	Sex	Age (years)	H (cm)	M (kg)	H (cm)	12minRT (m)	bmi
4018	M	14	148	39	148	2475	17.805
4019	M	14	160	53	160	2070	20.7031
4020	M	14	153	40	153	2505	17.0874
4021	M	14	158	45	158	2160	18.026
4022	M	14	153	44	153	2080	18.7962
4023	M	14	167	74	167	1875	26.5338
4024	M	14	171	45	171	2250	15.3894
4025	M	14	153	50	153	2205	21.3593
4026	M	14	147	42	147	2610	19.4363
4027	M	14	160	53	160	2220	20.7031
4028	M	14	160	64	160	1360	25
4029	M	14	158	51	158	2220	20.4294
4030	M	14	150	39	150	1870	17.3333
4031	M	14	163	49	163	2460	18.4425
4032	M	14	142	49	142	1890	24.3007
4033	M	14	155	32	155	1782	13.3195
4034	M	14	162	52	162	1890	19.8141
4035	M	14	170	74	170	1836	25.6055
4036	M	14	163	78	163	1836	29.3575
4037	M	14	174	58	174	1836	19.1571
4038	M	14	177	75	177	2592	23.9395
4039	M	14	171	75	171	1728	25.6489
4040	M	14	167	60	167	1890	21.5139
4041	M	14	176	51	176	2592	16.4644
4042	M	14	161	65	161	1782	25.0762
4043	M	14	170	64	170	1836	22.1453
4044	M	14	156	40	156	2538	16.4366
4045	M	14	156	48	156	2538	19.7239
4046	M	14	162	46	162	2160	17.5278
4047	M	14	164	46	164	2484	17.1029
4048	M	14	158	44	158	2430	17.6254
4049	M	14	173	73	173	1944	24.3911
4050	M	14	160	50	160	2430	19.5312
4051	M	14	185	70	185	2538	20.4529
4052	M	14	155	42	155	2474	17.4818
4053	M	14	162	48	162	2484	18.2899
4054	M	14	160	62	160	2430	24.2188
4055	M	14	157	46	157	2700	18.662
4056	M	14	159	49	159	2183	19.3821
4057	M	14	159	54	159	1700	21.3599
4058	M	14	166	70	166	1866	25.4028
4059	M	14	145	38	145	2388	18.0737
4060	M	14	158	60	158	1902	24.0346
4061	M	14	159	44	159	2750	17.4044
4062	M	14	156	48	156	2268	19.7239
4063	M	14	169	61	169	2050	21.3578
4064	M	14	173	54	173	2762	18.0427
4065	M	14	166	45	166	1650	16.3304
4066	M	14	149	44	149	2441	19.8189
4067	M	14	145	54	145	1778	25.6837
4068	M	14	169	63	169	2538	22.0581
4069	M	14	160	56	160	2245	21.875
4070	M	14	144	42	144	2077	20.2546
4071	M	14	169	42	169	2394	14.7054
4072	M	14	146	41	146	2444	19.2344
4073	M	14	165	52	165	2513	19.1001
4074	M	14	159	57	159	2439	22.5466
4075	M	14	160	50	160	2789	19.5312
4076	M	14	165	48	165	2596	17.6309
4077	M	14	175	87	175	1899	28.4082
4078	M	14	155	53	155	2545	22.0604
4079	M	14	150	43	150	2460	19.1111
4080	M	14	158	65	158	2300	26.0375
4081	M	14	168	75	168	2305	26.5731
4082	M	14	158	46	158	2415	18.4265
4083	M	14	153	43	153	2155	18.369
4084	M	14	169	58	169	2380	20.3074
4085	M	14	163	59	163	2382	22.2063
4086	M	14	150	45	150	2405	20
4087	M	14	150	37	150	2415	16.4444
4088	M	14	156	46	156	2416	18.902
4089	M	14	153	44	153	2396	18.7962
4090	M	14	150	36	150	2210	16
4091	M	14	145	54	145	1935	25.6837
4092	M	14	156	36	156	1750	14.7929
4093	M	14	169	78	169	2100	27.31
4094	M	14	163	46	163	1750	17.3134
4095	M	14	146	33	146	2520	15.4813
4096	M	14	174	72	174	2450	23.7812
4097	M	14	177	68	177	2710	21.7051
4098	M	14	176	57	176	2710	18.4013
4099	M	14	164	67	164	1520	24.9108
4100	M	14	171	45	171	2450	15.3894
4101	M	14	174	68	174	2170	22.46
4102	M	14	156	40	156	2390	16.4366
4103	M	14	155	40	155	2420	16.6493
4104	M	14	149	41	149	2380	18.4676
4105	M	14	143	33	143	2264	16.1377
4106	M	14	154	50	154	2219	21.0828
4107	M	14	166	56	166	1885	20.3223
4108	M	14	170	55	170	2172	19.0311
4109	M	14	156	37	156	2250	15.2038
4110	M	14	167	42	167	2005	15.0597
4111	M	14	154	34	154	1844	14.3363
4112	M	14	159	37	159	2253	14.6355
4113	M	14	148	40	148	1596	18.2615
4114	M	14	178	58	178	1913	18.3058
4115	M	14	158	44	158	2126	17.6254
4116	M	14	161	40	161	1931	15.4315
4117	M	14	153	46	153	1924	19.6506
4118	M	14	178	54	178	2073	17.0433
4119	M	14	155	37	155	1971	15.4006
4120	M	14	149	34	149	2268	15.3146
4121	M	14	166	48	166	2363	17.4191
4122	M	14	155	47	155	1978	19.563
4123	M	14	156	51	156	1655	20.9566
4124	M	14	173	51	173	2172	17.0403
4125	M	14	169	58	169	2505	20.3074
4126	M	14	170	55	170	1715	19.0311
4127	M	14	147	34	147	2178	15.7342
4128	M	14	199	102	199	1795	25.7569
4129	M	14	158	48	158	1937	19.2277
4130	M	14	151	39	151	2395	17.1045
4131	M	14	151	40	151	2200	17.5431
4132	M	14	156	40	156	2568	16.4366
4133	M	14	160	46	160	1810	17.9688
4134	M	14	148	39	148	2177	17.805
4135	M	14	165	50	165	2562	18.3655
4136	M	14	154	37	154	2244	15.6013
4137	M	14	164	46	164	2260	17.1029
4138	M	14	155	41	155	1915	17.0656
4139	M	14	176	66	176	2186	21.3068
4140	M	14	172	57	172	2062	19.2672
4141	M	14	178	63	178	2391	19.8839
4142	M	14	181	74	181	2369	22.5878
4143	M	14	148	70	148	1257	31.9576
4144	M	14	164	51	164	1971	18.9619
4145	M	14	150	53	150	1682	23.5556
4146	M	14	153	49	153	1670	20.9321
4147	M	14	156	43	156	1830	17.6693
4148	M	14	163	73	163	1650	27.4756
4149	M	14	173	56	173	2562	18.7109
4150	M	14	161	49	161	2000	18.9036
4151	M	14	174	60	174	2125	19.8177
4152	M	14	168	68	168	1950	24.093
4153	M	14	179	104	179	1150	32.4584
4154	M	14	158	46	158	2450	18.4265
4155	M	14	161	54	161	2052	20.8325
4156	M	14	158	45	158	2160	18.026
4157	M	14	170	58	170	1620	20.0692
4158	M	14	153	40	153	2100	17.0874
4159	M	14	170	48.6	170	2470	16.8166
4160	M	14	170	65.25	170	1950	22.5779
4161	M	14	163	58	163	2646	21.83
4162	M	14	163	50	163	2754	18.8189
4163	M	14	170	60	170	2430	20.7612
4164	M	14	160	55	160	2538	21.4844
4165	M	14	173	76	173	1935	25.3934
4166	M	14	164	64	164	2538	23.7954
4167	M	14	160	45	160	1836	17.5781
4168	M	14	166	61	166	2268	22.1367
4169	M	14	161	46	161	2310	17.7462
4170	M	14	164	71.7	164	1602	26.6582
4171	M	14	144.5	32.6	144.5	2528	15.6128
4172	M	14	167.5	54.4	167.5	2180	19.3896
4173	M	14	169	46	169	1851	16.1059
4174	M	14	183	103.5	183	1690	30.9057
4175	M	14	183	103.5	183	1690	30.9057
4176	M	14	166	62.7	166	2820	22.7537
4177	M	14	165	53.2	165	1560	19.5409
4178	M	14	165	67.7	165	1930	24.8669
4179	M	14	155	42.4	155	2510	17.6483
4180	M	14	170	51	170	2703	17.6471
4181	M	14	166	56	166	2410	20.3223
4182	M	14	181	62	181	2000	18.9249
4183	M	14	160	66	160	1540	25.7812
4184	M	14	170	50	170	2170	17.301
4185	M	14	173	66.5	173	2126	22.2193
4186	M	14	173	76	173	2133	25.3934
4187	M	14	169	81	169	1296	28.3604
4188	M	14	171	49.5	171	2560	16.9283
4189	M	14	178	64	178	2160	20.1995
4190	M	14	173	57	173	2560	19.0451
4191	M	14	152	46	152	1680	19.91
4192	M	14	165	53	165	2470	19.4674
4193	M	14	165	55	165	2267	20.202
4194	M	14	173	58	173	2600	19.3792
4195	M	14	172	62	172	2427	20.9573
4196	M	14	162	47	162	1693	17.9089
4197	M	14	175	62	175	2330	20.2449
4198	M	14	162	50	162	1512	19.052
4199	M	14	170	42	170	1536	14.5329
4200	M	14	156	62	156	1224	25.4767
4201	M	14	149	48	149	1750	21.6206
4202	M	14	160	42.5	160	2720	16.6016
4203	M	14	160	49	160	1760	19.1406
4204	M	14	164	47	164	2720	17.4747
4205	M	14	177	85	177	1900	27.1314
4206	M	14	177	85	177	1760	27.1314
4207	M	14	167	66	167	1760	23.6652
4208	M	14	176	69	176	2150	22.2753
4209	M	14	178	56.5	178	2000	17.8323
4210	M	14	166	57	166	2550	20.6852
4211	M	14	161	50.5	161	2400	19.4823
4212	M	14	173	68	173	2095	22.7204
4213	M	14	163	45	163	2130	16.937
4214	M	14	175	68	175	2305	22.2041
4215	M	14	175	83	175	1936	27.102
4216	M	14	176	65	176	2410	20.984
4217	M	14	163	67	163	1529	25.2174
4218	M	14	185	80	185	2500	23.3747
4219	M	14	174	65	174	2293	21.4692
4220	M	14	172	55	172	2640	18.5911
4221	M	14	173	76	173	2224	25.3934
4222	M	14	159	47	159	2500	18.591
4223	M	14	175	54	175	2500	17.6327
4224	M	14	151	40	151	2570	17.5431
4225	M	14	167	51.2	167	1800	18.3585
4226	M	14	174	64.1	174	900	21.1719
4227	M	14	163	53.1	163	2550	19.9857
4228	M	14	160	49	160	1500	19.1406
4229	M	14	167	59.6	167	1350	21.3704
4230	M	14	154	40.3	154	2700	16.9927
4231	M	14	152	44.7	152	1200	19.3473
4232	M	14	167	51.2	167	1800	18.3585
4233	M	14	174	64.1	174	900	21.1719
4234	M	14	163	53.1	163	2550	19.9857
4235	M	14	160	49	160	1500	19.1406
4236	M	14	167	59.6	167	1350	21.3704
4237	M	14	154	40.3	154	2700	16.9927
4238	M	14	152	44.7	152	1200	19.3473
4239	M	14	172	56.8	172	2550	19.1996
4240	M	14	170	53.2	170	1575	18.4083
4241	M	14	160	55.2	160	1950	21.5625
4242	M	14	163	84.6	163	975	31.8416
4243	M	14	168	64.2	168	1950	22.7466
4244	M	14	162	60.4	162	1950	23.0148
4245	M	14	172	57	172	3075	19.2672
4246	M	14	163	66.9	163	2250	25.1797
4247	M	14	170	52.7	170	2400	18.2353
4248	M	14	164	66.8	164	2550	24.8364
4249	M	14	173	60.9	173	2700	20.3482
4250	M	14	157	50	157	2300	20.2848
4251	M	14	178	65	178	2750	20.5151
4252	M	14	158	59	158	1700	23.634
4253	M	14	162	76	162	1400	28.959
4254	M	14	155	45	155	2300	18.7305
4255	M	14	170	57	170	2300	19.7232
4256	M	14	179	90	179	2000	28.089
4257	M	14	178	56	178	2300	17.6745
4258	M	14	171	70	171	1650	23.939
4259	M	14	168	72	168	2520	25.5102
4260	M	14	178	60	178	2430	18.937
4261	M	14	182	64	182	2700	19.3213
4262	M	14	171	69	171	2620	23.597
4263	M	14	170	51	170	2160	17.6471
4264	M	14	178	80	178	2670	25.2493
4265	M	14	178	80	178	2400	25.2493
4266	M	14	178	75	178	2640	23.6713
4267	M	14	180	91	180	2025	28.0864
4268	M	14	180	64	180	2430	19.7531
4269	M	14	170	51.5	170	1750	17.8201
4270	M	14	163	77	163	1750	28.9811
4271	M	14	173	62	173	1618	20.7157
4272	M	14	169	54	169	2722	18.9069
4273	M	14	166	54	166	2380	19.5965
4274	M	14	146	55	146	1500	25.8022
4275	M	14	151	50	151	2030	21.9289
4276	M	14	173	56	173	1890	18.7109
4277	M	14	177	64	177	1770	20.4284
4278	M	14	187	74	187	2000	21.1616
4279	M	14	165	77	165	1900	28.2828
4280	M	14	185	64	185	2000	18.6998
4281	M	14	165	53	165	2600	19.4674
4282	M	14	169	63	169	2300	22.0581
4283	M	14	166	48	166	2300	17.4191
4284	M	14	170	59	170	2300	20.4152
4285	M	14	163	59	163	2220	22.2063
4286	M	14	166	55	166	1980	19.9594
4287	M	14	161	41	161	2460	15.8173
4288	M	14	179	70	179	1920	21.847
4289	M	14	169	65	169	1080	22.8633
4290	M	14	169	65.3	169	1080	22.8633
4291	M	14	169	65	169	1080	22.8633
4292	M	14	169	65.3	169	1080	22.8633
4293	M	14	179	104	179	1150	32.4584
4294	M	14	152	44.7	152	1200	19.3473
4295	M	14	152	44.7	152	1200	19.3473
4296	M	14	152	44.7	152	1200	19.3473
4297	M	14	152	44.7	152	1200	19.3473
4298	M	14	152	44.7	152	1200	19.3473
4299	M	14	152	44.7	152	1200	19.3473
4300	M	14	156	62	156	1224	25.4767
4301	M	14	169	81	169	1296	28.3604
4302	M	14	169	81	169	1296	28.3604
4303	M	14	167	59.6	167	1350	21.3704
4304	M	14	167	59.6	167	1350	21.3704
4305	M	14	167	59.6	167	1350	21.3704
4306	M	14	167	59.6	167	1350	21.3704
4307	M	14	167	59.6	167	1350	21.3704
4308	M	14	167	59.6	167	1350	21.3704
4309	M	14	162	76	162	1400	28.959
4310	M	14	157	50	157	1410	20.082
4311	M	14	157	50	157	1410	20.082
4312	M	14	169	56	169	1440	19.5371
4313	M	14	169	55.8	169	1440	19.5371
4314	M	14	169	56	169	1440	19.5371
4315	M	14	169	55.8	169	1440	19.5371
4316	M	14	169	84	169	1480	29.4107
4317	M	14	169	84	169	1480	29.4107
4318	M	14	160	49	160	1500	19.1406
4319	M	14	160	49	160	1500	19.1406
4320	M	14	160	49	160	1500	19.1406
4321	M	14	160	49	160	1500	19.1406
4322	M	14	160	49	160	1500	19.1406
4323	M	14	160	49	160	1500	19.1406
4324	M	14	146	55	146	1500	25.8022
4325	M	14	162	50	162	1512	19.052
4326	M	14	161	49	161	1520	18.9036
4327	M	14	161	49	161	1520	18.9036
4328	M	14	163	67	163	1529	25.2174
4329	M	14	170	42	170	1536	14.5329
4330	M	14	160	66	160	1540	25.7812
4331	M	14	160	66	160	1540	25.7812
4332	M	14	160	66	160	1540	25.7812
4333	M	14	165	53.2	165	1560	19.5409
4334	M	14	170	53.2	170	1575	18.4083
4335	M	14	164	71.7	164	1602	26.6582
4336	M	14	164	71.7	164	1602	26.6582
4337	M	14	173	62	173	1618	20.7157
4338	M	14	173	62	173	1618	20.7157
4339	M	14	173	62	173	1618	20.7157
4340	M	14	170	58	170	1620	20.0692
4341	M	14	170	58	170	1620	20.0692
4342	M	14	170	58	170	1620	20.0692
4343	M	14	171	70	171	1650	23.939
4344	M	14	171	70	171	1650	23.939
4345	M	14	171	70	171	1650	23.939
4346	M	14	170	56	170	1668	19.3772
4347	M	14	170	56	170	1668	19.3772
4348	M	14	170	48	170	1674	16.609
4349	M	14	170	48	170	1674	16.609
4350	M	14	152	46	152	1680	19.91
4351	M	14	152	46	152	1680	19.91
4352	M	14	152	46	152	1680	19.91
4353	M	14	183	103.5	183	1690	30.9057
4354	M	14	183	103.5	183	1690	30.9057
4355	M	14	162	47	162	1693	17.9089
4356	M	14	155	64.9	155	1700	27.0135
4357	M	14	176	69	176	1700	22.2753
4358	M	14	158	59	158	1700	23.634
4359	M	14	155	64.9	155	1700	27.0135
4360	M	14	176	69	176	1700	22.2753
4361	M	14	158	59	158	1700	23.634
4362	M	14	158	59	158	1700	23.634
4363	M	14	173	62.4	173	1702	20.8493
4364	M	14	173	62.4	173	1702	20.8493
4365	M	14	164	65	164	1730	24.2787
4366	M	14	162	40	162	1730	15.2416
4367	M	14	164	65	164	1730	24.2787
4368	M	14	162	40	162	1730	15.2416
4369	M	14	164	64	164	1738	23.7954
4370	M	14	164	64	164	1738	23.7954
4371	M	14	165	51.6	165	1748	18.9532
4372	M	14	165	51.6	165	1748	18.9532
4373	M	14	157	48	157	1750	19.4734
4374	M	14	164	72	164	1750	26.7698
4375	M	14	170	51.5	170	1750	17.8201
4376	M	14	149	48	149	1750	21.6206
4377	M	14	157	48	157	1750	19.4734
4378	M	14	164	72	164	1750	26.7698
4379	M	14	170	51.5	170	1750	17.8201
4380	M	14	149	48	149	1750	21.6206
4381	M	14	149	48	149	1750	21.6206
4382	M	14	170	51.5	170	1750	17.8201
4383	M	14	163	77	163	1750	28.9811
4384	M	14	162	52	162	1760	19.8141
4385	M	14	162	52	162	1760	19.8141
4386	M	14	160	49	160	1760	19.1406
4387	M	14	177	85	177	1760	27.1314
4388	M	14	167	66	167	1760	23.6652
4389	M	14	177	64	177	1770	20.4284
4390	M	14	177	88	177	1794	28.0571
4391	M	14	177	88	177	1794	28.0571
4392	M	14	159	45	159	1799	17.7604
4393	M	14	159	45	159	1799	17.7604
4394	M	14	150	50	150	1800	22.2222
4395	M	14	170	68	170	1800	23.5294
4396	M	14	170	69	170	1800	23.8754
4397	M	14	168	67	168	1800	23.7387
4398	M	14	150	50	150	1800	22.2222
4399	M	14	170	68	170	1800	23.5294
4400	M	14	170	69	170	1800	23.8754
4401	M	14	168	67	168	1800	23.7387
4402	M	14	167	51.2	167	1800	18.3585
4403	M	14	167	51.2	167	1800	18.3585
4404	M	14	174	58.9	174	1802	19.4544
4405	M	14	174	58.9	174	1802	19.4544
4406	M	14	172	66	172	1810	22.1403
4407	M	14	172	66	172	1810	22.1403
4408	M	14	160	45	160	1836	17.5781
4409	M	14	160	45	160	1836	17.5781
4410	M	14	160	45	160	1836	17.5781
4411	M	14	180	83.3	180	1840	25.7099
4412	M	14	180	83.3	180	1840	25.7099
4413	M	14	169	46	169	1851	16.1059
4414	M	14	169	46	169	1851	16.1059
4415	M	14	154	55	154	1890	23.0224
4416	M	14	154	54.6	154	1890	23.0224
4417	M	14	182	90	182	1890	27.1706
4418	M	14	154	55	154	1890	23.0224
4419	M	14	154	54.6	154	1890	23.0224
4420	M	14	182	90	182	1890	27.1706
4421	M	14	173	56	173	1890	18.7109
4422	M	14	182	85	182	1896	25.6612
4423	M	14	182	85	182	1896	25.6612
4424	M	14	160	44	160	1900	17.1875
4425	M	14	165	77	165	1900	28.2828
4426	M	14	160	44	160	1900	17.1875
4427	M	14	177	85	177	1900	27.1314
4428	M	14	165	77	165	1900	28.2828
4429	M	14	165	65	165	1908	23.6915
4430	M	14	165	65	165	1908	23.6915
4431	M	14	179	70	179	1920	21.847
4432	M	14	165	67.7	165	1930	24.8669
4433	M	14	173	76	173	1935	25.3934
4434	M	14	173	76	173	1935	25.3934
4435	M	14	173	76	173	1935	25.3934
4436	M	14	175	83	175	1936	27.102
4437	M	14	175	83	175	1936	27.102
4438	M	14	166	58	166	1946	21.048
4439	M	14	166	58	166	1946	21.048
4440	M	14	173	80	173	1950	26.7299
4441	M	14	175	80	175	1950	26.1224
4442	M	14	170	65.25	170	1950	22.5779
4443	M	14	160	55.2	160	1950	21.5625
4444	M	14	168	68	168	1950	24.093
4445	M	14	173	80	173	1950	26.7299
4446	M	14	175	80	175	1950	26.1224
4447	M	14	170	65.25	170	1950	22.5779
4448	M	14	160	55.2	160	1950	21.5625
4449	M	14	168	68	168	1950	24.093
4450	M	14	168	68	168	1950	24.093
4451	M	14	170	65.25	170	1950	22.5779
4452	M	14	160	55.2	160	1950	21.5625
4453	M	14	168	64.2	168	1950	22.7466
4454	M	14	162	60.4	162	1950	23.0148
4455	M	14	166	55	166	1980	19.9594
4456	M	14	161	45	161	2000	17.3219
4457	M	14	185	64	185	2000	18.6998
4458	M	14	187	74	187	2000	21.1616
4459	M	14	181	62	181	2000	18.9249
4460	M	14	179	90	179	2000	28.089
4461	M	14	161	45	161	2000	17.3219
4462	M	14	185	64	185	2000	18.6998
4463	M	14	187	74	187	2000	21.1616
4464	M	14	181	62	181	2000	18.9249
4465	M	14	161	49	161	2000	18.9036
4466	M	14	181	62	181	2000	18.9249
4467	M	14	178	56.5	178	2000	17.8323
4468	M	14	179	90	179	2000	28.089
4469	M	14	187	74	187	2000	21.1616
4470	M	14	185	64	185	2000	18.6998
4471	M	14	165	50.6	165	2006	18.5859
4472	M	14	165	50.6	165	2006	18.5859
4473	M	14	161	74	161	2016	28.5483
4474	M	14	161	74	161	2016	28.5483
4475	M	14	178	60.3	178	2024	19.0317
4476	M	14	178	60.3	178	2024	19.0317
4477	M	14	180	91	180	2025	28.0864
4478	M	14	151	50	151	2030	21.9289
4479	M	14	158	45.5	158	2031	18.2262
4480	M	14	158	45.5	158	2031	18.2262
4481	M	14	172	60.7	172	2042	20.5178
4482	M	14	172	60.7	172	2042	20.5178
4483	M	14	174	72	174	2050	23.7812
4484	M	14	174	72	174	2050	23.7812
4485	M	14	161	54	161	2052	20.8325
4486	M	14	161	54	161	2052	20.8325
4487	M	14	161	54	161	2052	20.8325
4488	M	14	169	50	169	2085	17.5064
4489	M	14	164	51	164	2085	18.9619
4490	M	14	176	55	176	2085	17.7557
4491	M	14	173	59	173	2085	19.7133
4492	M	14	160	60	160	2085	23.4375
4493	M	14	182	73	182	2085	22.0384
4494	M	14	169	50	169	2085	17.5064
4495	M	14	164	51	164	2085	18.9619
4496	M	14	176	55	176	2085	17.7557
4497	M	14	173	59	173	2085	19.7133
4498	M	14	160	60	160	2085	23.4375
4499	M	14	182	73	182	2085	22.0384
4500	M	14	170	56	170	2086	19.3772
4501	M	14	175	53	175	2086	17.3061
4502	M	14	170	56	170	2086	19.3772
4503	M	14	175	53	175	2086	17.3061
4504	M	14	173	68	173	2095	22.7204
4505	M	14	173	68	173	2095	22.7204
4506	M	14	173	68	173	2095	22.7204
4507	M	14	163	63	163	2100	23.8248
4508	M	14	159	49	159	2100	19.3821
4509	M	14	163	63.3	163	2100	23.8248
4510	M	14	153	40	153	2100	17.0874
4511	M	14	163	63	163	2100	23.8248
4512	M	14	159	49	159	2100	19.3821
4513	M	14	163	63.3	163	2100	23.8248
4514	M	14	153	40	153	2100	17.0874
4515	M	14	153	40	153	2100	17.0874
4516	M	14	158	42	158	2114	16.8242
4517	M	14	158	42	158	2114	16.8242
4518	M	14	174	60	174	2125	19.8177
4519	M	14	174	60	174	2125	19.8177
4520	M	14	174	60	174	2125	19.8177
4521	M	14	173	66.5	173	2126	22.2193
4522	M	14	173	66.5	173	2126	22.2193
4523	M	14	173	66.5	173	2126	22.2193
4524	M	14	163	45	163	2130	16.937
4525	M	14	163	45	163	2130	16.937
4526	M	14	163	45	163	2130	16.937
4527	M	14	173	76	173	2133	25.3934
4528	M	14	173	76	173	2133	25.3934
4529	M	14	173	76	173	2133	25.3934
4530	M	14	176	69	176	2150	22.2753
4531	M	14	160	55	160	2155	21.4844
4532	M	14	169	56	169	2155	19.6072
4533	M	14	160	55	160	2155	21.4844
4534	M	14	169	56	169	2155	19.6072
4535	M	14	160	57	160	2160	22.0703
4536	M	14	167	46	167	2160	16.5657
4537	M	14	168	48	168	2160	16.9005
4538	M	14	167	46.2	167	2160	16.5657
4539	M	14	168	47.7	168	2160	16.9005
4540	M	14	178	64	178	2160	20.1995
4541	M	14	158	45	158	2160	18.026
4542	M	14	170	51	170	2160	17.6471
4543	M	14	160	57	160	2160	22.0703
4544	M	14	167	46	167	2160	16.5657
4545	M	14	168	48	168	2160	16.9005
4546	M	14	167	46.2	167	2160	16.5657
4547	M	14	168	47.7	168	2160	16.9005
4548	M	14	178	64	178	2160	20.1995
4549	M	14	158	45	158	2160	18.026
4550	M	14	170	51	170	2160	17.6471
4551	M	14	158	45	158	2160	18.026
4552	M	14	178	64	178	2160	20.1995
4553	M	14	170	51	170	2160	17.6471
4554	M	14	170	50	170	2170	17.301
4555	M	14	170	50	170	2170	17.301
4556	M	14	170	50	170	2170	17.301
4557	M	14	154	33	154	2180	13.7882
4558	M	14	150	38	150	2180	16.6667
4559	M	14	164	44	164	2180	16.2478
4560	M	14	170	56	170	2180	19.5156
4561	M	14	174	67	174	2180	22.1297
4562	M	14	150	37.5	150	2180	16.6667
4563	M	14	154	32.7	154	2180	13.7882
4564	M	14	164	43.7	164	2180	16.2478
4565	M	14	170	56.4	170	2180	19.5156
4566	M	14	167.5	54.4	167.5	2180	19.3896
4567	M	14	154	33	154	2180	13.7882
4568	M	14	150	38	150	2180	16.6667
4569	M	14	164	44	164	2180	16.2478
4570	M	14	170	56	170	2180	19.5156
4571	M	14	174	67	174	2180	22.1297
4572	M	14	150	37.5	150	2180	16.6667
4573	M	14	154	32.7	154	2180	13.7882
4574	M	14	164	43.7	164	2180	16.2478
4575	M	14	170	56.4	170	2180	19.5156
4576	M	14	167.5	54.4	167.5	2180	19.3896
4577	M	14	167.5	54.4	167.5	2180	19.3896
4578	M	14	160	43	160	2190	16.6406
4579	M	14	160	42.6	160	2190	16.6406
4580	M	14	160	43	160	2190	16.6406
4581	M	14	160	42.6	160	2190	16.6406
4582	M	14	159	56	159	2200	22.151
4583	M	14	165	49	165	2200	17.9982
4584	M	14	159	56	159	2200	22.151
4585	M	14	165	49	165	2200	17.9982
4586	M	14	168	62	168	2210	21.79
4587	M	14	174	76	174	2210	24.9372
4588	M	14	168	62	168	2210	21.79
4589	M	14	174	76	174	2210	24.9372
4590	M	14	184	65	184	2220	19.199
4591	M	14	184	65	184	2220	19.199
4592	M	14	163	59	163	2220	22.2063
4593	M	14	166	46	166	2224	16.6933
4594	M	14	177	55	177	2224	17.5556
4595	M	14	170	55	170	2224	19.0311
4596	M	14	171	56	171	2224	19.1512
4597	M	14	179	62	179	2224	19.3502
4598	M	14	176	73	176	2224	23.5666
4599	M	14	169	80	169	2224	28.0102
4600	M	14	166	46	166	2224	16.6933
4601	M	14	177	55	177	2224	17.5556
4602	M	14	170	55	170	2224	19.0311
4603	M	14	171	56	171	2224	19.1512
4604	M	14	179	62	179	2224	19.3502
4605	M	14	176	73	176	2224	23.5666
4606	M	14	169	80	169	2224	28.0102
4607	M	14	173	76	173	2224	25.3934
4608	M	14	180	65	180	2230	20.0617
4609	M	14	180	65	180	2230	20.0617
4610	M	14	155	41.6	155	2233	17.3153
4611	M	14	155	41.6	155	2233	17.3153
4612	M	14	148	44	148	2250	20.0877
4613	M	14	172	51	172	2250	17.239
4614	M	14	160	50	160	2250	19.5312
4615	M	14	163	66.9	163	2250	25.1797
4616	M	14	168	54	168	2250	19.1327
4617	M	14	148	44	148	2250	20.0877
4618	M	14	172	51	172	2250	17.239
4619	M	14	160	50	160	2250	19.5312
4620	M	14	163	66.9	163	2250	25.1797
4621	M	14	168	54	168	2250	19.1327
4622	M	14	163	66.9	163	2250	25.1797
4623	M	14	166	54	166	2260	19.5965
4624	M	14	166	54	166	2260	19.5965
4625	M	14	165	55	165	2267	20.202
4626	M	14	165	55	165	2267	20.202
4627	M	14	165	55	165	2267	20.202
4628	M	14	160	47	160	2268	18.1641
4629	M	14	166	61	166	2268	22.1367
4630	M	14	160	47	160	2268	18.1641
4631	M	14	166	61	166	2268	22.1367
4632	M	14	166	61	166	2268	22.1367
4633	M	14	165	56	165	2280	20.3857
4634	M	14	165	56	165	2280	20.3857
4635	M	14	174	65	174	2293	21.4692
4636	M	14	183	60	183	2294	17.9163
4637	M	14	174	60	174	2294	19.8177
4638	M	14	183	60	183	2294	17.9163
4639	M	14	174	60	174	2294	19.8177
4640	M	14	155	45	155	2300	18.7305
4641	M	14	157	50	157	2300	20.2848
4642	M	14	166	48	166	2300	17.4191
4643	M	14	169	63	169	2300	22.0581
4644	M	14	170	59	170	2300	20.4152
4645	M	14	170	57	170	2300	19.7232
4646	M	14	178	56	178	2300	17.6745
4647	M	14	155	45	155	2300	18.7305
4648	M	14	157	50	157	2300	20.2848
4649	M	14	166	48	166	2300	17.4191
4650	M	14	169	63	169	2300	22.0581
4651	M	14	170	59	170	2300	20.4152
4652	M	14	170	57	170	2300	19.7232
4653	M	14	178	56	178	2300	17.6745
4654	M	14	157	50	157	2300	20.2848
4655	M	14	155	45	155	2300	18.7305
4656	M	14	170	57	170	2300	19.7232
4657	M	14	178	56	178	2300	17.6745
4658	M	14	169	63	169	2300	22.0581
4659	M	14	166	48	166	2300	17.4191
4660	M	14	170	59	170	2300	20.4152
4661	M	14	175	68	175	2305	22.2041
4662	M	14	175	68	175	2305	22.2041
4663	M	14	175	68	175	2305	22.2041
4664	M	14	165	57	165	2310	20.9366
4665	M	14	174	65	174	2310	21.4692
4666	M	14	161	46	161	2310	17.7462
4667	M	14	165	57	165	2310	20.9366
4668	M	14	174	65	174	2310	21.4692
4669	M	14	161	46	161	2310	17.7462
4670	M	14	161	46	161	2310	17.7462
4671	M	14	175	62	175	2330	20.2449
4672	M	14	179	72	179	2340	22.5336
4673	M	14	168	79	168	2340	28.0258
4674	M	14	168	79.1	168	2340	28.0258
4675	M	14	179	72.2	179	2340	22.5336
4676	M	14	179	72	179	2340	22.5336
4677	M	14	168	79	168	2340	28.0258
4678	M	14	168	79.1	168	2340	28.0258
4679	M	14	179	72.2	179	2340	22.5336
4680	M	14	164	53.8	164	2346	20.003
4681	M	14	164	53.8	164	2346	20.003
4682	M	14	160	44	160	2363	17.1875
4683	M	14	168	45	168	2363	15.9439
4684	M	14	177	54	177	2363	17.2364
4685	M	14	171	60	171	2363	20.5191
4686	M	14	184	69	184	2363	20.3804
4687	M	14	178	71	178	2363	22.4088
4688	M	14	160	44	160	2363	17.1875
4689	M	14	168	45	168	2363	15.9439
4690	M	14	177	54	177	2363	17.2364
4691	M	14	171	60	171	2363	20.5191
4692	M	14	184	69	184	2363	20.3804
4693	M	14	178	71	178	2363	22.4088
4694	M	14	156	46	156	2380	18.902
4695	M	14	172	58	172	2380	19.6052
4696	M	14	156	46	156	2380	18.902
4697	M	14	172	58	172	2380	19.6052
4698	M	14	166	54	166	2380	19.5965
4699	M	14	164	52	164	2400	19.3337
4700	M	14	160	47	160	2400	18.1641
4701	M	14	160	46.5	160	2400	18.1641
4702	M	14	161	48	161	2400	18.5178
4703	M	14	166	56	166	2400	20.3223
4704	M	14	170	52.7	170	2400	18.2353
4705	M	14	172	67	172	2400	22.6474
4706	M	14	178	80	178	2400	25.2493
4707	M	14	180	57	180	2400	17.5926
4708	M	14	164	52	164	2400	19.3337
4709	M	14	160	47	160	2400	18.1641
4710	M	14	160	46.5	160	2400	18.1641
4711	M	14	161	48	161	2400	18.5178
4712	M	14	166	56	166	2400	20.3223
4713	M	14	170	52.7	170	2400	18.2353
4714	M	14	172	67	172	2400	22.6474
4715	M	14	178	80	178	2400	25.2493
4716	M	14	180	57	180	2400	17.5926
4717	M	14	161	50.5	161	2400	19.4823
4718	M	14	170	52.7	170	2400	18.2353
4719	M	14	178	80	178	2400	25.2493
4720	M	14	176	65	176	2410	20.984
4721	M	14	166	56	166	2410	20.3223
4722	M	14	176	65	176	2410	20.984
4723	M	14	166	56	166	2410	20.3223
4724	M	14	166	56	166	2410	20.3223
4725	M	14	176	65	176	2410	20.984
4726	M	14	172	62	172	2427	20.9573
4727	M	14	172	62	172	2427	20.9573
4728	M	14	172	62	172	2427	20.9573
4729	M	14	170	60	170	2430	20.7612
4730	M	14	178	60	178	2430	18.937
4731	M	14	180	64	180	2430	19.7531
4732	M	14	170	60	170	2430	20.7612
4733	M	14	178	60	178	2430	18.937
4734	M	14	180	64	180	2430	19.7531
4735	M	14	170	60	170	2430	20.7612
4736	M	14	178	60	178	2430	18.937
4737	M	14	180	64	180	2430	19.7531
4738	M	14	173	54	173	2433	18.0427
4739	M	14	177	56	177	2433	17.8748
4740	M	14	179	64	179	2433	19.9744
4741	M	14	184	68	184	2433	20.0851
4742	M	14	173	54	173	2433	18.0427
4743	M	14	177	56	177	2433	17.8748
4744	M	14	179	64	179	2433	19.9744
4745	M	14	184	68	184	2433	20.0851
4746	M	14	178	75	178	2450	23.545
4747	M	14	178	74.6	178	2450	23.545
4748	M	14	158	46	158	2450	18.4265
4749	M	14	178	75	178	2450	23.545
4750	M	14	178	74.6	178	2450	23.545
4751	M	14	158	46	158	2450	18.4265
4752	M	14	158	46	158	2450	18.4265
4753	M	14	166	61	166	2460	21.9553
4754	M	14	178	63	178	2460	19.726
4755	M	14	166	61	166	2460	22.1367
4756	M	14	166	61	166	2460	21.9553
4757	M	14	178	63	178	2460	19.726
4758	M	14	166	61	166	2460	22.1367
4759	M	14	161	41	161	2460	15.8173
4760	M	14	167	52	167	2470	18.6453
4761	M	14	170	48.6	170	2470	16.8166
4762	M	14	165	53	165	2470	19.4674
4763	M	14	167	52	167	2470	18.6453
4764	M	14	170	48.6	170	2470	16.8166
4765	M	14	165	53	165	2470	19.4674
4766	M	14	170	48.6	170	2470	16.8166
4767	M	14	165	53	165	2470	19.4674
4768	M	14	176	65	176	2472	20.984
4769	M	14	176	65	176	2472	20.984
4770	M	14	170	52.6	170	2484	18.2007
4771	M	14	170	52.6	170	2484	18.2007
4772	M	14	185	80	185	2500	23.3747
4773	M	14	159	47	159	2500	18.591
4774	M	14	175	54	175	2500	17.6327
4775	M	14	166	59	166	2502	21.4109
4776	M	14	174	63	174	2502	20.8086
4777	M	14	166	59	166	2502	21.4109
4778	M	14	174	63	174	2502	20.8086
4779	M	14	155	42.4	155	2510	17.6483
4780	M	14	155	42.4	155	2510	17.6483
4781	M	14	155	42.4	155	2510	17.6483
4782	M	14	160	45	160	2520	17.5391
4783	M	14	160	44.9	160	2520	17.5391
4784	M	14	168	72	168	2520	25.5102
4785	M	14	160	45	160	2520	17.5391
4786	M	14	160	44.9	160	2520	17.5391
4787	M	14	168	72	168	2520	25.5102
4788	M	14	168	72	168	2520	25.5102
4789	M	14	144.5	32.6	144.5	2528	15.6128
4790	M	14	144.5	32.6	144.5	2528	15.6128
4791	M	14	160	55	160	2538	21.4844
4792	M	14	164	64	164	2538	23.7954
4793	M	14	160	55	160	2538	21.4844
4794	M	14	164	64	164	2538	23.7954
4795	M	14	160	55	160	2538	21.4844
4796	M	14	164	64	164	2538	23.7954
4797	M	14	163	53.1	163	2550	19.9857
4798	M	14	163	53.1	163	2550	19.9857
4799	M	14	166	57	166	2550	20.6852
4800	M	14	172	56.8	172	2550	19.1996
4801	M	14	163	53.1	163	2550	19.9857
4802	M	14	163	53.1	163	2550	19.9857
4803	M	14	166	57	166	2550	20.6852
4804	M	14	172	56.8	172	2550	19.1996
4805	M	14	166	57	166	2550	20.6852
4806	M	14	163	53.1	163	2550	19.9857
4807	M	14	163	53.1	163	2550	19.9857
4808	M	14	172	56.8	172	2550	19.1996
4809	M	14	164	66.8	164	2550	24.8364
4810	M	14	177	72	177	2560	22.9819
4811	M	14	173	57	173	2560	19.0451
4812	M	14	177	72	177	2560	22.9819
4813	M	14	173	57	173	2560	19.0451
4814	M	14	171	49.5	171	2560	16.9283
4815	M	14	173	57	173	2560	19.0451
4816	M	14	167	50	167	2565	17.9282
4817	M	14	167	50	167	2565	17.9282
4818	M	14	151	40	151	2570	17.5431
4819	M	14	159	45	159	2572	17.7999
4820	M	14	161	56	161	2572	21.6041
4821	M	14	184	65	184	2572	19.199
4822	M	14	173	68	173	2572	22.7204
4823	M	14	159	45	159	2572	17.7999
4824	M	14	161	56	161	2572	21.6041
4825	M	14	184	65	184	2572	19.199
4826	M	14	173	68	173	2572	22.7204
4827	M	14	162	40	162	2590	15.2416
4828	M	14	164	45	164	2590	16.7311
4829	M	14	162	40	162	2590	15.2416
4830	M	14	164	45	164	2590	16.7311
4831	M	14	180	76	180	2600	23.3951
4832	M	14	168	58.7	168	2600	20.7979
4833	M	14	180	75.8	180	2600	23.3951
4834	M	14	165	53	165	2600	19.4674
4835	M	14	173	58	173	2600	19.3792
4836	M	14	180	76	180	2600	23.3951
4837	M	14	168	58.7	168	2600	20.7979
4838	M	14	180	75.8	180	2600	23.3951
4839	M	14	165	53	165	2600	19.4674
4840	M	14	173	58	173	2600	19.3792
4841	M	14	173	58	173	2600	19.3792
4842	M	14	165	53	165	2600	19.4674
4843	M	14	171	69	171	2620	23.597
4844	M	14	171	69	171	2620	23.597
4845	M	14	171	69	171	2620	23.597
4846	M	14	178	75	178	2640	23.6713
4847	M	14	178	75	178	2640	23.6713
4848	M	14	172	55	172	2640	18.5911
4849	M	14	178	75	178	2640	23.6713
4850	M	14	169	62	169	2641	21.7079
4851	M	14	172	75	172	2641	25.3515
4852	M	14	169	62	169	2641	21.7079
4853	M	14	172	75	172	2641	25.3515
4854	M	14	163	58	163	2646	21.83
4855	M	14	163	58	163	2646	21.83
4856	M	14	163	58	163	2646	21.83
4857	M	14	164	48	164	2661	17.735
4858	M	14	164	48	164	2661	17.735
4859	M	14	172	53	172	2665	17.9151
4860	M	14	172	53	172	2665	17.9151
4861	M	14	178	80	178	2670	25.2493
4862	M	14	178	80	178	2670	25.2493
4863	M	14	178	80	178	2670	25.2493
4864	M	14	154	40.3	154	2700	16.9927
4865	M	14	154	40.3	154	2700	16.9927
4866	M	14	182	64	182	2700	19.3213
4867	M	14	154	40.3	154	2700	16.9927
4868	M	14	154	40.3	154	2700	16.9927
4869	M	14	182	64	182	2700	19.3213
4870	M	14	154	40.3	154	2700	16.9927
4871	M	14	154	40.3	154	2700	16.9927
4872	M	14	173	60.9	173	2700	20.3482
4873	M	14	182	64	182	2700	19.3213
4874	M	14	170	51	170	2703	17.6471
4875	M	14	170	51	170	2703	17.6471
4876	M	14	170	51	170	2703	17.6471
4877	M	14	176	56	176	2711	18.0785
4878	M	14	169	60	169	2711	21.0077
4879	M	14	176	56	176	2711	18.0785
4880	M	14	169	60	169	2711	21.0077
4881	M	14	160	42.5	160	2720	16.6016
4882	M	14	164	47	164	2720	17.4747
4883	M	14	169	54	169	2722	18.9069
4884	M	14	169	54	169	2722	18.9069
4885	M	14	169	54	169	2722	18.9069
4886	M	14	178	65	178	2750	20.5151
4887	M	14	178	65	178	2750	20.5151
4888	M	14	178	65	178	2750	20.5151
4889	M	14	163	50	163	2754	18.8189
4890	M	14	163	50	163	2754	18.8189
4891	M	14	163	50	163	2754	18.8189
4892	M	14	183	70	183	2765	20.9024
4893	M	14	183	70	183	2765	20.9024
4894	M	14	176	63	176	2780	20.3383
4895	M	14	181	67	181	2780	20.4511
4896	M	14	176	63	176	2780	20.3383
4897	M	14	181	67	181	2780	20.4511
4898	M	14	145	45	145	2800	21.4031
4899	M	14	145	45	145	2800	21.4031
4900	M	14	172	55.2	172	2806	18.6587
4901	M	14	172	55.2	172	2806	18.6587
4902	M	14	166	62.7	166	2820	22.7537
4903	M	14	166	62.7	166	2820	22.7537
4904	M	14	166	62.7	166	2820	22.7537
4905	M	14	176	54	176	2825	17.37
4906	M	14	175.5	53.5	175.5	2825	17.37
4907	M	14	176	54	176	2825	17.37
4908	M	14	175.5	53.5	175.5	2825	17.37
4909	M	14	172	52	172	2919	17.5771
4910	M	14	171	57	171	2919	19.4932
4911	M	14	172	52	172	2919	17.5771
4912	M	14	171	57	171	2919	19.4932
4913	M	14	161	46	161	3058	17.7462
4914	M	14	161	46	161	3058	17.7462
4915	M	14	172	57	172	3075	19.2672
4916	M	14	172	57	172	3075	19.2672
4917	M	14	172	57	172	3075	19.2672
4918	M	14	175	62	175	3080	20.2449
4919	M	14	175	62	175	3080	20.2449
4920	M	14	180	69	180	3174	21.2963
4921	M	14	180	69	180	3174	21.2963

## Sheet: regressione m14
SUMMARY OUTPUT
Regression Statistics
Multiple R	0.352293
R Square	0.12411
Adjusted R Square	0.122166
Standard Error	366.755
Observations	904
ANOVA
	df	SS	MS	F	Significance F
Regression	2	1.71725e+07	8.58627e+06	63.8342	1.18428e-26
Residual	901	1.21192e+08	134509
Total	903	1.38365e+08
	Coefficients	Standard Error	t Stat	P-value	Lower 95%	Upper 95%	Lower 95,0%	Upper 95,0%
Intercept	-195.591	262.192	-0.745985	0.455871	-710.168	318.986	-710.168	318.986
M (kg)	-14.0479	1.35578	-10.3615	7.61157e-24	-16.7088	-11.3871	-16.7088	-11.3871
H (cm)	19.1072	1.84907	10.3335	9.88822e-24	15.4783	22.7362	15.4783	22.7362

## Sheet: f11
ID	Sex	Age (years)	sub	H (cm)	M (kg)	12minRT (m)	bmi
A1	F	11	1	148	39	1470	17.805
A2	F	11	2	148	41	1560	18.718
A3	F	11	3	156	49	1671	20.1348
A4	F	11	4	150	40	1755	17.7778
A5	F	11	5	150	38	1800	16.8889
A6	F	11	6	132	28.5	1008	16.3567
A7	F	11	7	132	28.5	1008	16.3567
A8	F	11	8	132	28.5	1008	16.3567
A9	F	11	9	151	44.4	1025	19.4728
A10	F	11	10	165	62.7	1050	23.0303
A11	F	11	11	145	37.5	1056	17.8359
A12	F	11	12	150	42	1056	18.6667
A13	F	11	13	145	37.5	1056	17.8359
A14	F	11	14	150	42	1056	18.6667
A15	F	11	15	150	42	1056	18.6667
A16	F	11	16	145	37.5	1056	17.8359
A17	F	11	17	150	41	1059	18.2222
A18	F	11	18	150	41	1059	18.2222
A19	F	11	19	150	41	1059	18.2222
A20	F	11	20	153	33	1104	14.0971
A21	F	11	21	153	33	1104	14.0971
A22	F	11	22	151	39	1104	17.1045
A23	F	11	23	155	45	1128	18.7305
A24	F	11	24	145	35	1134	16.6468
A25	F	11	25	149	57.9	1134	26.0799
A26	F	11	26	145	35	1134	16.6468
A27	F	11	27	149	57.9	1134	26.0799
A28	F	11	28	149	51.6	1140	23.2422
A29	F	11	29	149	51.6	1140	23.2422
A30	F	11	30	149	51.6	1140	23.2422
A31	F	11	31	145	48	1140	22.83
A32	F	11	32	151	60	1172	26.3146
A33	F	11	33	151	60	1172	26.3146
A34	F	11	34	150	39	1188	17.3333
A35	F	11	35	150	39	1188	17.3333
A36	F	11	36	150	39	1188	17.3333
A37	F	11	37	135	36	1200	19.7531
A38	F	11	38	163	53.8	1200	20.2492
A39	F	11	39	135	36	1200	19.7531
A40	F	11	40	163	53.8	1200	20.2492
A41	F	11	41	135	36	1200	19.7531
A42	F	11	42	163	53.8	1200	20.2492
A43	F	11	43	154	35	1219	14.758
A44	F	11	44	154	35	1219	14.758
A45	F	11	45	137	35	1224	18.6478
A46	F	11	46	142	31	1224	15.3739
A47	F	11	47	137	35	1224	18.6478
A48	F	11	48	142	31	1224	15.3739
A49	F	11	49	142	31	1224	15.3739
A50	F	11	50	137	35	1224	18.6478
A51	F	11	51	151.5	60	1254	26.1412
A52	F	11	52	142.5	46.7	1260	22.9978
A53	F	11	53	150	42	1272	18.6667
A54	F	11	54	150	42	1272	18.6667
A55	F	11	55	150	42	1272	18.6667
A56	F	11	56	139	36	1285	18.6326
A57	F	11	57	139	36	1285	18.6326
A58	F	11	58	139	36	1285	18.6326
A59	F	11	59	161	54	1296	20.8325
A60	F	11	60	161	54	1296	20.8325
A61	F	11	61	150	63	1296	28
A62	F	11	62	153	41	1300	17.5146
A63	F	11	63	153	41	1300	17.5146
A64	F	11	64	157	44.1	1304	17.8912
A65	F	11	65	130	32	1322.45	18.9349
A66	F	11	66	153	49.3	1350	21.0603
A67	F	11	67	137	40	1350	21.3117
A68	F	11	68	164	49	1350	18.2183
A69	F	11	69	153	49.3	1350	21.0603
A70	F	11	70	137	40	1350	21.3117
A71	F	11	71	164	49	1350	18.2183
A72	F	11	72	148	32	1350	14.6092
A73	F	11	73	164	49	1350	18.2183
A74	F	11	74	137	40	1350	21.3117
A75	F	11	75	156	50	1350	20.5457
A76	F	11	76	153	49.3	1350	21.0603
A77	F	11	77	154.5	43.3	1354	18.1397
A78	F	11	78	152	60	1360	25.9695
A79	F	11	79	157	76.7	1360	31.1169
A80	F	11	80	150	45	1374	20
A81	F	11	81	150	45	1374	20
A82	F	11	82	145	42	1376	19.9762
A83	F	11	83	157	49	1378.72	19.8791
A84	F	11	84	157.5	56.7	1380	22.8571
A85	F	11	85	150	43.8	1380	19.4667
A86	F	11	86	147	40	1400	18.5108
A87	F	11	87	145	55	1400	26.1593
A88	F	11	88	147	40	1400	18.5108
A89	F	11	89	145	55	1400	26.1593
A90	F	11	90	147	40	1400	18.5108
A91	F	11	91	153	76	1404	32.2526
A92	F	11	92	138	32	1404	16.8032
A93	F	11	93	146	44	1404	20.6418
A94	F	11	94	156	50	1404	20.5457
A95	F	11	95	156	58	1404	23.833
A96	F	11	96	166	80.5	1404	29.2132
A97	F	11	97	153	76	1404	32.2526
A98	F	11	98	138	32	1404	16.8032
A99	F	11	99	146	44	1404	20.6418
A100	F	11	100	156	50	1404	20.5457
A101	F	11	101	156	58	1404	23.833
A102	F	11	102	156	50	1404	20.5457
A103	F	11	103	147	49	1404	22.6757
A104	F	11	104	161	73	1404	28.1625
A105	F	11	105	156	58	1404	23.833
A106	F	11	106	146	44	1404	20.6418
A107	F	11	107	166	80.5	1404	29.2132
A108	F	11	108	142	45	1419	22.1682
A109	F	11	109	142	45	1419	22.1682
A110	F	11	110	151	52	1423	22.806
A111	F	11	111	156	48.5	1425	19.9293
A112	F	11	112	156	48.5	1425	19.9293
A113	F	11	113	156	48.5	1425	19.9293
A114	F	11	114	143	53.7	1430	26.2605
A115	F	11	115	158	50	1433.63	20.0288
A116	F	11	116	152	65	1437	28.1337
A117	F	11	117	153	50	1438	21.3593
A118	F	11	118	138	45	1438	23.6295
A119	F	11	119	154	40	1439	16.8663
A120	F	11	120	154	40	1439	16.8663
A121	F	11	121	154	40	1439	16.8663
A122	F	11	122	146	36	1440	16.8887
A123	F	11	123	156	68	1440	27.9421
A124	F	11	124	151.5	47	1440	20.4773
A125	F	11	125	150	51	1449	22.6667
A126	F	11	126	150	51	1449	22.6667
A127	F	11	127	150	51	1449	22.6667
A128	F	11	128	151	48.8	1450	21.4026
A129	F	11	129	151	48.8	1450	21.4026
A130	F	11	130	151	48.8	1450	21.4026
A131	F	11	131	165	55	1452	20.202
A132	F	11	132	165	55	1452	20.202
A133	F	11	133	165	55	1452	20.202
A134	F	11	134	143	41	1456	20.0499
A135	F	11	135	143	41	1456	20.0499
A136	F	11	136	143	41	1456	20.0499
A137	F	11	137	146	37	1456.18	17.3579
A138	F	11	138	145	42	1469	19.9762
A139	F	11	139	145	42	1469	19.9762
A140	F	11	140	145	42	1469	19.9762
A141	F	11	141	146	36	1470	16.8887
A142	F	11	142	146	36	1470	16.8887
A143	F	11	143	146	36	1470	16.8887
A144	F	11	144	149	53	1470	23.8728
A145	F	11	145	147	37.7	1471	17.4464
A146	F	11	146	147	37.7	1471	17.4464
A147	F	11	147	147	37.7	1471	17.4464
A148	F	11	148	145	58	1473	27.5862
A149	F	11	149	145	58	1473	27.5862
A150	F	11	150	156	48	1480	19.7239
A151	F	11	151	156	48	1480	19.7239
A152	F	11	152	156	48	1480	19.7239
A153	F	11	153	169	43	1489.66	15.0555
A154	F	11	154	151	53.2	1496	23.3323
A155	F	11	155	151	53.2	1496	23.3323
A156	F	11	156	151	53.2	1496	23.3323
A157	F	11	157	170	79.3	1499	27.4394
A158	F	11	158	154	55	1500	23.1911
A159	F	11	159	145.5	34.2	1500	16.1547
A160	F	11	160	151	47	1500	20.6131
A161	F	11	161	145	49	1502	23.3056
A162	F	11	162	145	49	1502	23.3056
A163	F	11	163	145	49	1502	23.3056
A164	F	11	164	148	44.1	1509	20.1333
A165	F	11	165	148	44.1	1509	20.1333
A166	F	11	166	148	44.1	1509	20.1333
A167	F	11	167	160	57	1510	22.2656
A168	F	11	168	150	40	1510	17.7778
A169	F	11	169	142	45	1512	22.317
A170	F	11	170	142	45	1512	22.317
A171	F	11	171	142	45	1512	22.317
A172	F	11	172	138	34	1515	17.8534
A173	F	11	173	138	34	1515	17.8534
A174	F	11	174	163	57.4	1516	21.6041
A175	F	11	175	163	57.4	1516	21.6041
A176	F	11	176	163	57.4	1516	21.6041
A177	F	11	177	156	48.5	1520	19.9293
A178	F	11	178	159	41	1520	16.2177
A179	F	11	179	156	48.5	1520	19.9293
A180	F	11	180	159	41	1520	16.2177
A181	F	11	181	156	48.5	1520	19.9293
A182	F	11	182	159	41	1520	16.2177
A183	F	11	183	158	44	1524.71	17.6254
A184	F	11	184	162	73.5	1525	28.0064
A185	F	11	185	162	73.5	1525	28.0064
A186	F	11	186	156	41	1529	16.8475
A187	F	11	187	156	41	1529	16.8475
A188	F	11	188	141	39	1535	19.6167
A189	F	11	189	141	39	1535	19.6167
A190	F	11	190	141	39	1535	19.6167
A191	F	11	191	154	52	1539	22.0526
A192	F	11	192	155	45	1539	18.7305
A193	F	11	193	154	52	1539	22.0526
A194	F	11	194	155	45	1539	18.7305
A195	F	11	195	155	45	1539	18.7305
A196	F	11	196	130	30	1540	17.7515
A197	F	11	197	159	43.5	1540	17.2066
A198	F	11	198	130	30	1540	17.7515
A199	F	11	199	159	43.5	1540	17.2066
A200	F	11	200	130	30	1540	17.7515
A201	F	11	201	159	43.5	1540	17.2066
A202	F	11	202	168	55	1540	19.487
A203	F	11	203	153	38	1542.86	16.2331
A204	F	11	204	163	62	1550	23.3355
A205	F	11	205	143	43	1553.96	21.0279
A206	F	11	206	152	51	1556	22.0741
A207	F	11	207	152	51	1556	22.0741
A208	F	11	208	152	51	1556	22.0741
A209	F	11	209	143	38	1557.69	18.5828
A210	F	11	210	142	38.6	1560	19.143
A211	F	11	211	147	46.8	1560	21.6576
A212	F	11	212	150	39.8	1560	17.6889
A213	F	11	213	142	38.6	1560	19.143
A214	F	11	214	147	46.8	1560	21.6576
A215	F	11	215	150	39.8	1560	17.6889
A216	F	11	216	153.5	65.8	1560	27.926
A217	F	11	217	144.5	48.2	1560	23.084
A218	F	11	218	163	67	1560	25.2174
A219	F	11	219	142	34	1560	16.8617
A220	F	11	220	142	38.6	1560	19.143
A221	F	11	221	150	39.8	1560	17.6889
A222	F	11	222	147	46.8	1560	21.6576
A223	F	11	223	148	48	1560	21.9138
A224	F	11	224	160	63.8	1565	24.9219
A225	F	11	225	139	50	1565.22	25.8786
A226	F	11	226	143	33	1566	16.1377
A227	F	11	227	152	57.3	1568	24.8009
A228	F	11	228	153	43.9	1568	18.7535
A229	F	11	229	152	57.3	1568	24.8009
A230	F	11	230	153	43.9	1568	18.7535
A231	F	11	231	152	57.3	1568	24.8009
A232	F	11	232	153	43.9	1568	18.7535
A233	F	11	233	135	31	1572.82	17.0096
A234	F	11	234	146	37	1575	17.3579
A235	F	11	235	146	37	1575	17.3579
A236	F	11	236	150	45	1575	20
A237	F	11	237	149	54	1575	24.3232
A238	F	11	238	146	37	1575	17.3579
A239	F	11	239	153	40	1576	17.0874
A240	F	11	240	153	40	1576	17.0874
A241	F	11	241	150	33	1577	14.6667
A242	F	11	242	150	33	1577	14.6667
A243	F	11	243	138	39.5	1580	20.7414
A244	F	11	244	151.5	47	1580	20.4773
A245	F	11	245	138	39.5	1580	20.7414
A246	F	11	246	151.5	47	1580	20.4773
A247	F	11	247	138	39.5	1580	20.7414
A248	F	11	248	151.5	47	1580	20.4773
A249	F	11	249	157	49	1580	19.8791
A250	F	11	250	139	46	1581	23.653
A251	F	11	251	139	46	1581	23.653
A252	F	11	252	153	42.5	1584	18.1554
A253	F	11	253	140	37	1584.35	18.8776
A254	F	11	254	156	38	1588.24	15.6147
A255	F	11	255	153	42	1588.24	17.9418
A256	F	11	256	145	34	1590	16.1712
A257	F	11	257	145	34	1590	16.1712
A258	F	11	258	145	34	1590	16.1712
A259	F	11	259	146	39	1595	18.2961
A260	F	11	260	149	38	1600	17.1163
A261	F	11	261	157	55	1600	22.3133
A262	F	11	262	139	44.6	1600	23.0837
A263	F	11	263	142	40.8	1600	20.2341
A264	F	11	264	147	36.5	1600	16.8911
A265	F	11	265	149	38	1600	17.1163
A266	F	11	266	157	55	1600	22.3133
A267	F	11	267	139	44.6	1600	23.0837
A268	F	11	268	142	40.8	1600	20.2341
A269	F	11	269	147	36.5	1600	16.8911
A270	F	11	270	144	36	1600	17.3611
A271	F	11	271	137	33	1600	17.5822
A272	F	11	272	142	40.8	1600	20.2341
A273	F	11	273	139	44.6	1600	23.0837
A274	F	11	274	147	36.5	1600	16.8911
A275	F	11	275	151	36	1603.96	15.7888
A276	F	11	276	157	52	1605	21.0962
A277	F	11	277	148.5	27.5	1606	12.4704
A278	F	11	278	145.5	50.6	1606	23.9015
A279	F	11	279	134	28	1610	15.5937
A280	F	11	280	138	37.2	1610	19.5337
A281	F	11	281	134	28	1610	15.5937
A282	F	11	282	138	37.2	1610	19.5337
A283	F	11	283	138	37.2	1610	19.5337
A284	F	11	284	134	28	1610	15.5937
A285	F	11	285	157	45	1610	18.2563
A286	F	11	286	166	58.3	1615	21.1569
A287	F	11	287	166	58.3	1615	21.1569
A288	F	11	288	166	58.3	1615	21.1569
A289	F	11	289	137	31	1615.96	16.5166
A290	F	11	290	144	38	1620	18.1809
A291	F	11	291	147	38.8	1620	17.9555
A292	F	11	292	138	38	1620	19.9538
A293	F	11	293	140.5	31	1620	15.704
A294	F	11	294	146	44.4	1620	20.8294
A295	F	11	295	149	43	1620	19.3685
A296	F	11	296	156	49.4	1620	20.2991
A297	F	11	297	156	48	1620	19.7239
A298	F	11	298	144	38	1620	18.1809
A299	F	11	299	147	38.8	1620	17.9555
A300	F	11	300	138	38	1620	19.9538
A301	F	11	301	140.5	31	1620	15.704
A302	F	11	302	146	44.4	1620	20.8294
A303	F	11	303	149	43	1620	19.3685
A304	F	11	304	156	49.4	1620	20.2991
A305	F	11	305	156	48	1620	19.7239
A306	F	11	306	149	38	1620	17.1163
A307	F	11	307	148	41	1620	18.718
A308	F	11	308	155	46	1620	19.1467
A309	F	11	309	146	61	1620	28.617
A310	F	11	310	138	38	1620	19.9538
A311	F	11	311	150	43.9	1620	19.5111
A312	F	11	312	156	49.4	1620	20.2991
A313	F	11	313	146	44.4	1620	20.8294
A314	F	11	314	140.5	31	1620	15.704
A315	F	11	315	147	38.8	1620	17.9555
A316	F	11	316	148	37	1624.06	16.8919
A317	F	11	317	150	46.9	1629	20.8444
A318	F	11	318	158	36	1629	14.4208
A319	F	11	319	150	46.9	1629	20.8444
A320	F	11	320	150	46.9	1629	20.8444
A321	F	11	321	156.5	43.4	1630	17.7199
A322	F	11	322	156.5	43.4	1630	17.7199
A323	F	11	323	156.5	43.4	1630	17.7199
A324	F	11	324	149	38	1632	17.1163
A325	F	11	325	149	38	1632	17.1163
A326	F	11	326	153	47.2	1634	20.1632
A327	F	11	327	153	47.2	1634	20.1632
A328	F	11	328	153	47.2	1634	20.1632
A329	F	11	329	154	53.5	1635	22.5586
A330	F	11	330	154	53.5	1635	22.5586
A331	F	11	331	154	53.5	1635	22.5586
A332	F	11	332	143	53.2	1635	26.0159
A333	F	11	333	146	45	1636.36	21.1109
A334	F	11	334	157	55.2	1637	22.3944
A335	F	11	335	145	36	1640	17.1225
A336	F	11	336	150	47	1640	20.8889
A337	F	11	337	150.5	32.8	1640	14.4811
A338	F	11	338	145	36	1640	17.1225
A339	F	11	339	150	47	1640	20.8889
A340	F	11	340	150	47	1640	20.8889
A341	F	11	341	150.5	32.8	1640	14.4811
A342	F	11	342	145	36	1640	17.1225
A343	F	11	343	145	31	1640.51	14.7444
A344	F	11	344	133	32	1640.51	18.0903
A345	F	11	345	148	40	1645	18.2615
A346	F	11	346	148	40	1645	18.2615
A347	F	11	347	148	40	1645	18.2615
A348	F	11	348	138	39	1650	20.4789
A349	F	11	349	138	39	1650	20.4789
A350	F	11	350	154	52	1650	21.9261
A351	F	11	351	154	50.9	1650	21.4623
A352	F	11	352	137	35.8	1652	19.074
A353	F	11	353	169	59.1	1652	20.6926
A354	F	11	354	137	35.8	1652	19.074
A355	F	11	355	169	59.1	1652	20.6926
A356	F	11	356	137	35.8	1652	19.074
A357	F	11	357	169	59.1	1652	20.6926
A358	F	11	358	157	55	1660	22.4756
A359	F	11	359	141	39	1660	19.6167
A360	F	11	360	156	40	1660	16.4366
A361	F	11	361	157	55	1660	22.4756
A362	F	11	362	141	39	1660	19.6167
A363	F	11	363	156	40	1660	16.4366
A364	F	11	364	154	55	1660	23.1911
A365	F	11	365	156	40	1660	16.4366
A366	F	11	366	141	39	1660	19.6167
A367	F	11	367	150	46	1661.54	20.4444
A368	F	11	368	155	52	1661.54	21.6441
A369	F	11	369	155	42	1668	17.4818
A370	F	11	370	155	42	1668	17.4818
A371	F	11	371	143	48.3	1674	23.6197
A372	F	11	372	136	32	1674	17.301
A373	F	11	373	155	37	1674	15.4006
A374	F	11	374	164	54	1674	20.0773
A375	F	11	375	143	48.3	1674	23.6197
A376	F	11	376	136	32	1674	17.301
A377	F	11	377	155	37	1674	15.4006
A378	F	11	378	164	54	1674	20.0773
A379	F	11	379	164	54	1674	20.0773
A380	F	11	380	155	37	1674	15.4006
A381	F	11	381	139.5	45.7	1674	23.4838
A382	F	11	382	143	48.3	1674	23.6197
A383	F	11	383	130	28	1674.42	16.568
A384	F	11	384	160	49	1676	19.1406
A385	F	11	385	160	49	1676	19.1406
A386	F	11	386	160	49	1676	19.1406
A387	F	11	387	149	40	1683	17.9271
A388	F	11	388	149	40	1683	17.9271
A389	F	11	389	144.5	38	1683	18.199
A390	F	11	390	140	33.5	1690	17.0918
A391	F	11	391	141	31	1690	15.5928
A392	F	11	392	148	35.5	1690	16.2071
A393	F	11	393	140	33.5	1690	17.0918
A394	F	11	394	141	31	1690	15.5928
A395	F	11	395	148	35.5	1690	16.2071
A396	F	11	396	148	35.5	1690	16.2071
A397	F	11	397	141	31	1690	15.5928
A398	F	11	398	140	33.5	1690	17.0918
A399	F	11	399	135	32	1692	17.5583
A400	F	11		135	32	1692	17.5583
A401	F	11		153	40.2	1698	17.1729
A402	F	11		153	40.2	1698	17.1729
A403	F	11		153	40.2	1698	17.1729
A404	F	11		154	50	1700	21.0828
A405	F	11		143	29.4	1700	14.3772
A406	F	11		154	50	1700	21.0828
A407	F	11		154	50	1700	21.0828
A408	F	11		143	29.4	1700	14.3772
A409	F	11		161	53	1700	20.4467
A410	F	11		145	42	1701	19.786
A411	F	11		145	42	1701	19.786
A412	F	11		142	30	1704	14.878
A413	F	11		140	30	1705.26	15.3061
A414	F	11		142	31	1705.26	15.3739
A415	F	11		150	35	1705.26	15.5556
A416	F	11		160	50	1707	19.5312
A417	F	11		160	50	1707	19.5312
A418	F	11		160	50	1707	19.5312
A419	F	11		157	38.5	1708	15.6193
A420	F	11		157	38.5	1708	15.6193
A421	F	11		145	40.7	1708	19.3579
A422	F	11		157	38.5	1708	15.6193
A423	F	11		142	34	1710	17.0105
A424	F	11		143	35.6	1710	17.4092
A425	F	11		153	38.5	1710	16.4467
A426	F	11		142	34	1710	17.0105
A427	F	11		143	35.6	1710	17.4092
A428	F	11		153	38.5	1710	16.4467
A429	F	11		143	35.6	1710	17.4092
A430	F	11		153	38.5	1710	16.4467
A431	F	11		155	43	1714.29	17.898
A432	F	11		150	40	1720	17.7778
A433	F	11		158	67.4	1720	26.9989
A434	F	11		150	40	1720	17.7778
A435	F	11		158	67.4	1720	26.9989
A436	F	11		150	40	1720	17.7778
A437	F	11		165	42	1720	15.427
A438	F	11		156	51	1725	20.9566
A439	F	11		156	51	1725	20.9566
A440	F	11		156	51	1725	20.9566
A441	F	11		146	34.6	1728	16.2319
A442	F	11		155	42.1	1728	17.5234
A443	F	11		133	27	1728	15.2637
A444	F	11		150	42	1728	18.6667
A445	F	11		160	50.6	1728	19.7656
A446	F	11		146	34.6	1728	16.2319
A447	F	11		155	42.1	1728	17.5234
A448	F	11		133	27	1728	15.2637
A449	F	11		150	42	1728	18.6667
A450	F	11		160	50.6	1728	19.7656
A451	F	11		147	32	1728	14.8086
A452	F	11		144	31	1728	14.9498
A453	F	11		138	36	1728	18.9036
A454	F	11		160	50.6	1728	19.7656
A455	F	11		140	45.6	1728	23.2653
A456	F	11		145	49.3	1728	23.4483
A457	F	11		155	42.1	1728	17.5234
A458	F	11		146	34.6	1728	16.2319
A459	F	11		158	41.7	1730	16.7041
A460	F	11		146	36	1730	16.8887
A461	F	11		158	41.7	1730	16.7041
A462	F	11		146	36	1730	16.8887
A463	F	11		158	41.7	1730	16.7041
A464	F	11		146	36	1730	16.8887
A465	F	11		150	40	1731	17.7778
A466	F	11		156	48	1731	19.7239
A467	F	11		150	40	1731	17.7778
A468	F	11		156	48	1731	19.7239
A469	F	11		152	49	1733	21.2084
A470	F	11		154	51.3	1733	21.631
A471	F	11		159	51	1733	20.1733
A472	F	11		152	49	1733	21.2084
A473	F	11		154	51.3	1733	21.631
A474	F	11		159	51	1733	20.1733
A475	F	11		152	49	1733	21.2084
A476	F	11		154	51.3	1733	21.631
A477	F	11		159	51	1733	20.1733
A478	F	11		164	41	1740	15.2439
A479	F	11		164	41	1740	15.2439
A480	F	11		154	42.1	1740	17.7517
A481	F	11		164	41	1740	15.2439
A482	F	11		136	29	1742	15.6791
A483	F	11		136	29	1742	15.6791
A484	F	11		136	29	1742	15.6791
A485	F	11		134	31	1743	17.2644
A486	F	11		134	31	1743	17.2644
A487	F	11		154	39	1748	16.4024
A488	F	11		162	53	1748	20.1951
A489	F	11		154	39	1748	16.4024
A490	F	11		162	53	1748	20.1951
A491	F	11		162	53	1748	20.1951
A492	F	11		167	77.4	1749	27.7529
A493	F	11		167	77.4	1749	27.7529
A494	F	11		138	29	1750	15.2279
A495	F	11		153	38	1750	16.2331
A496	F	11		138	29	1750	15.2279
A497	F	11		153	38	1750	16.2331
A498	F	11		153	38	1750	16.2331
A499	F	11		138	29	1750	15.2279
A500	F	11		142	36	1751.35	17.8536
A501	F	11		144	40	1752	19.2901
A502	F	11		144	40	1752	19.2901
A503	F	11		157	40	1755	16.2278
A504	F	11		157	40	1755	16.2278
A505	F	11		157	40	1755	16.2278
A506	F	11		154	34.1	1760	14.3785
A507	F	11		143	38	1760	18.5828
A508	F	11		154	34.1	1760	14.3785
A509	F	11		151	38	1760.87	16.6659
A510	F	11		148	40	1760.87	18.2615
A511	F	11		159	48.8	1761	19.303
A512	F	11		159	48.8	1761	19.303
A513	F	11		159	48.8	1761	19.303
A514	F	11		166	43	1764	15.6046
A515	F	11		166	43	1764	15.6046
A516	F	11		165	65	1764	23.8751
A517	F	11		166	43	1764	15.6046
A518	F	11		164	52	1765	19.3337
A519	F	11		164	52	1765	19.3337
A520	F	11		164	52	1765	19.3337
A521	F	11		152	51.3	1767	22.2039
A522	F	11		152	40	1767	17.313
A523	F	11		152	51.3	1767	22.2039
A524	F	11		152	40	1767	17.313
A525	F	11		152	51.3	1767	22.2039
A526	F	11		152	40	1767	17.313
A527	F	11		145	36.5	1768	17.3603
A528	F	11		145	36.5	1768	17.3603
A529	F	11		145	36.5	1768	17.3603
A530	F	11		147	51	1769	23.6013
A531	F	11		160	50.6	1769	19.7656
A532	F	11		159	35	1769	13.8444
A533	F	11		147	51	1769	23.6013
A534	F	11		160	50.6	1769	19.7656
A535	F	11		160	50.6	1769	19.7656
A536	F	11		159	35	1769	13.8444
A537	F	11		147	51	1769	23.6013
A538	F	11		138	39	1770	20.4789
A539	F	11		153	35.2	1775	15.037
A540	F	11		153	35.2	1775	15.037
A541	F	11		153	35.2	1775	15.037
A542	F	11		144	33	1775.34	15.9144
A543	F	11		154	63	1782	26.3957
A544	F	11		138	28.8	1782	15.1229
A545	F	11		139	40	1782	20.7029
A546	F	11		154	63	1782	26.3957
A547	F	11		138	28.8	1782	15.1229
A548	F	11		139	40	1782	20.7029
A549	F	11		150	50	1782	22.2222
A550	F	11		152	41	1782	17.7458
A551	F	11		138	28.8	1782	15.1229
A552	F	11		147	41	1785.12	18.9736
A553	F	11		139	45	1790	23.0319
A554	F	11		154	48	1790	20.2395
A555	F	11		139	45	1790	23.0319
A556	F	11		154	48	1790	20.2395
A557	F	11		154	48	1790	20.2395
A558	F	11		142	38	1790	18.8455
A559	F	11		161	41	1795.01	15.8173
A560	F	11		150	43	1800	19.2444
A561	F	11		162	53	1800	20.1951
A562	F	11		146	33	1800	15.4813
A563	F	11		155	47	1800	19.563
A564	F	11		150	43	1800	19.2444
A565	F	11		162	53	1800	20.1951
A566	F	11		146	33	1800	15.4813
A567	F	11		155	47	1800	19.563
A568	F	11		146	33	1800	15.4813
A569	F	11		143	33.2	1800	16.2355
A570	F	11		141	32.5	1800	16.3473
A571	F	11		158	45	1800	18.026
A572	F	11		155	47	1800	19.563
A573	F	11		151	43	1802	18.815
A574	F	11		151	43	1802	18.815
A575	F	11		143	33	1803	16.1377
A576	F	11		143	33	1803	16.1377
A577	F	11		138	33	1810	17.3283
A578	F	11		147	42.2	1810	19.5289
A579	F	11		138	33	1810	17.3283
A580	F	11		147	42.2	1810	19.5289
A581	F	11		151	46	1810	20.1746
A582	F	11		138	33	1810	17.3283
A583	F	11		147	42.2	1810	19.5289
A584	F	11		155	39	1810.06	16.2331
A585	F	11		138	43	1810.06	22.5793
A586	F	11		140	30	1815.13	15.3061
A587	F	11		150	55	1815.13	24.4444
A588	F	11		154	39	1816	16.4446
A589	F	11		154	39	1816	16.4446
A590	F	11		164	55	1819	20.4491
A591	F	11		164	55	1819	20.4491
A592	F	11		164	55	1819	20.4491
A593	F	11		152	59.8	1820	25.883
A594	F	11		152	59.8	1820	25.883
A595	F	11		137	26	1825	13.8526
A596	F	11		155	40	1825.35	16.6493
A597	F	11		148	42	1825.35	19.1746
A598	F	11		154	36	1826	15.1796
A599	F	11		154	36	1826	15.1796
A600	F	11		154	36	1826	15.1796
A601	F	11		150	32	1827	14
A602	F	11		150	32	1827	14
A603	F	11		151	40	1830	17.5431
A604	F	11		155	52	1830	21.6441
A605	F	11		164	46.2	1830	17.1773
A606	F	11		151	40	1830	17.5431
A607	F	11		155	52	1830	21.6441
A608	F	11		164	46.2	1830	17.1773
A609	F	11		151	40	1830	17.5431
A610	F	11		164	46.2	1830	17.1773
A611	F	11		164	46.2	1830	17.1773
A612	F	11		155	52	1830	21.6441
A613	F	11		149	43	1830.51	19.3685
A614	F	11		151	45	1831	19.736
A615	F	11		151	45	1831	19.736
A616	F	11		151	45	1831	19.736
A617	F	11		138	31	1835	16.2781
A618	F	11		138	31	1835	16.2781
A619	F	11		138	31	1835	16.2781
A620	F	11		166	47	1835.69	17.0562
A621	F	11		151	47.5	1836	20.8324
A622	F	11		154	48.1	1836	20.2817
A623	F	11		161	46.7	1836	18.0163
A624	F	11		146	38	1836	17.827
A625	F	11		148	43	1836	19.6311
A626	F	11		155	49	1836	20.3954
A627	F	11		151	47.5	1836	20.8324
A628	F	11		154	48.1	1836	20.2817
A629	F	11		161	46.7	1836	18.0163
A630	F	11		146	38	1836	17.827
A631	F	11		148	43	1836	19.6311
A632	F	11		155	49	1836	20.3954
A633	F	11		162	54	1836	20.5761
A634	F	11		145	40	1836	19.025
A635	F	11		148	43	1836	19.6311
A636	F	11		155	49	1836	20.3954
A637	F	11		161	46.7	1836	18.0163
A638	F	11		151	47.5	1836	20.8324
A639	F	11		154	48.1	1836	20.2817
A640	F	11		156	43	1840	17.6693
A641	F	11		156	43	1840	17.6693
A642	F	11		156	43	1840	17.6693
A643	F	11		141	29	1840.91	14.5868
A644	F	11		154	43	1845	18.1312
A645	F	11		154	43	1845	18.1312
A646	F	11		154	43	1845	18.1312
A647	F	11		150	40	1846	17.7778
A648	F	11		150	40	1846	17.7778
A649	F	11		150	40	1846	17.7778
A650	F	11		152	40	1848	17.313
A651	F	11		162	45	1848	17.1468
A652	F	11		152	40	1848	17.313
A653	F	11		162	45	1848	17.1468
A654	F	11		147	43	1850	19.8991
A655	F	11		154	45	1850	18.9745
A656	F	11		147	43	1850	19.8991
A657	F	11		154	45	1850	18.9745
A658	F	11		154	45	1850	18.9745
A659	F	11		144	33.9	1851	16.3484
A660	F	11		140	31	1851	15.8163
A661	F	11		144	33.9	1851	16.3484
A662	F	11		140	31	1851	15.8163
A663	F	11		144	33.9	1851	16.3484
A664	F	11		140	31	1851	15.8163
A665	F	11		149.5	41.5	1852	18.568
A666	F	11		149.5	41.5	1852	18.568
A667	F	11		149.5	41.5	1852	18.568
A668	F	11		150	34	1855	15.1111
A669	F	11		153	41	1855	17.5146
A670	F	11		150	34	1855	15.1111
A671	F	11		153	41	1855	17.5146
A672	F	11		153	41	1855	17.5146
A673	F	11		150	34	1855	15.1111
A674	F	11		152.5	52.5	1856	22.5746
A675	F	11		152.5	52.5	1856	22.5746
A676	F	11		152.5	52.5	1856	22.5746
A677	F	11		143	45	1856.73	22.006
A678	F	11		144	33	1860	15.9144
A679	F	11		144	33	1860	15.9144
A680	F	11		154	50	1860	21.0828
A681	F	11		153	45.8	1860	19.5651
A682	F	11		144	33	1860	15.9144
A683	F	11		154	41.6	1864	17.5409
A684	F	11		154	41.6	1864	17.5409
A685	F	11		154	41.6	1864	17.5409
A686	F	11		150	40	1865	17.9556
A687	F	11		150	40	1865	17.9556
A688	F	11		155	35	1867.44	14.5682
A689	F	11		147	41.2	1870	19.0661
A690	F	11		153	38	1870	16.2331
A691	F	11		147	41.2	1870	19.0661
A692	F	11		153	38	1870	16.2331
A693	F	11		153	38	1870	16.2331
A694	F	11		147	41.2	1870	19.0661
A695	F	11		147.5	29	1871	13.3295
A696	F	11		147.5	29	1871	13.3295
A697	F	11		138	43	1874	22.5793
A698	F	11		138	43	1874	22.5793
A699	F	11		138	43	1874	22.5793
A700	F	11		144	42	1878.26	20.2546
A701	F	11		152	60	1881	26.1427
A702	F	11		152	60	1881	26.1427
A703	F	11		143	39	1885	19.0718
A704	F	11		143	39	1885	19.0718
A705	F	11		143	39	1885	19.0718
A706	F	11		162	41	1887	15.6226
A707	F	11		162	41	1887	15.6226
A708	F	11		162	41	1887	15.6226
A709	F	11		156	49	1888	20.1348
A710	F	11		156	49	1888	20.1348
A711	F	11		156	49	1888	20.1348
A712	F	11		142	42	1890	20.8292
A713	F	11		145	37.3	1890	17.7408
A714	F	11		146	41	1890	19.2344
A715	F	11		146	45	1890	21.1109
A716	F	11		149	45	1890	20.2694
A717	F	11		150	37	1890	16.4444
A718	F	11		162	55	1890	20.9572
A719	F	11		167	52	1890	18.6453
A720	F	11		142	42	1890	20.8292
A721	F	11		145	37.3	1890	17.7408
A722	F	11		146	41	1890	19.2344
A723	F	11		146	45	1890	21.1109
A724	F	11		149	45	1890	20.2694
A725	F	11		150	37	1890	16.4444
A726	F	11		162	55	1890	20.9572
A727	F	11		167	52	1890	18.6453
A728	F	11		162	55	1890	20.9572
A729	F	11		167	52	1890	18.6453
A730	F	11		146	41	1890	19.2344
A731	F	11		142	42	1890	20.8292
A732	F	11		150	37	1890	16.4444
A733	F	11		149	45	1890	20.2694
A734	F	11		145	37.3	1890	17.7408
A735	F	11		138	33	1890	17.3283
A736	F	11		155	42	1890	17.4818
A737	F	11		133	27.9	1891	15.7725
A738	F	11		133	27.9	1891	15.7725
A739	F	11		149	35	1894.74	15.7651
A740	F	11		158	42.1	1896	16.8643
A741	F	11		158	42.1	1896	16.8643
A742	F	11		158	42.1	1896	16.8643
A743	F	11		139	35	1898	18.115
A744	F	11		139	35	1898	18.115
A745	F	11		139	35	1898	18.115
A746	F	11		153	36	1899	15.3787
A747	F	11		153	36	1899	15.3787
A748	F	11		153	36	1899	15.3787
A749	F	11		143	35	1900	17.0179
A750	F	11		147	40	1900	18.3257
A751	F	11		160	63	1900	24.6094
A752	F	11		143	35	1900	17.0179
A753	F	11		147	40	1900	18.3257
A754	F	11		160	63	1900	24.6094
A755	F	11		149	48	1900.29	21.6206
A756	F	11		151	44	1911.5	19.2974
A757	F	11		142	39	1911.5	19.3414
A758	F	11		157	36.2	1917	14.6862
A759	F	11		157	36.2	1917	14.6862
A760	F	11		143	36	1917.16	17.6048
A761	F	11		144	36	1918	17.2164
A762	F	11		144	36	1918	17.2164
A763	F	11		140	36.9	1920	18.8265
A764	F	11		140	31	1920	15.8163
A765	F	11		144	32	1920	15.4321
A766	F	11		148	39	1920	17.805
A767	F	11		150	40	1920	17.7778
A768	F	11		155	34	1920	14.1519
A769	F	11		140	36.9	1920	18.8265
A770	F	11		140	31	1920	15.8163
A771	F	11		144	32	1920	15.4321
A772	F	11		148	39	1920	17.805
A773	F	11		150	40	1920	17.7778
A774	F	11		133.5	28	1920	15.7107
A775	F	11		152	44	1920	19.0443
A776	F	11		150	40	1920	17.7778
A777	F	11		140	36.9	1920	18.8265
A778	F	11		155	34	1920	14.1519
A779	F	11		146	36	1920	16.8887
A780	F	11		140	31	1920	15.8163
A781	F	11		148	39	1920	17.805
A782	F	11		144	32	1920	15.4321
A783	F	11		132	25.75	1930	14.7785
A784	F	11		153	46	1930	19.6506
A785	F	11		143	45	1934	22.006
A786	F	11		143	45	1934	22.006
A787	F	11		143	45	1934	22.006
A788	F	11		151	38	1934.33	16.6659
A789	F	11		143	33.5	1944	16.3822
A790	F	11		140	37	1944	18.8776
A791	F	11		141	37	1944	18.6107
A792	F	11		142	42	1944	20.8292
A793	F	11		149	39	1944	17.5668
A794	F	11		152	42.3	1944	18.3085
A795	F	11		156	52	1944	21.3675
A796	F	11		143	33.5	1944	16.3822
A797	F	11		140	37	1944	18.8776
A798	F	11		141	37	1944	18.6107
A799	F	11		142	42	1944	20.8292
A800	F	11		149	39	1944	17.5668
A801	F	11		152	42.3	1944	18.3085
A802	F	11		156	52	1944	21.3675
A803	F	11		156	52	1944	21.3675
A804	F	11		141	37	1944	18.6107
A805	F	11		142	42	1944	20.8292
A806	F	11		140	37	1944	18.8776
A807	F	11		152	42.3	1944	18.3085
A808	F	11		143	33.5	1944	16.3822
A809	F	11		147	32	1945	14.8086
A810	F	11		147	32	1945	14.8086
A811	F	11		155	56	1949	23.1842
A812	F	11		150	33	1949	14.6667
A813	F	11		155	56	1949	23.1842
A814	F	11		150	33	1949	14.6667
A815	F	11		137	38.1	1950	20.2994
A816	F	11		147	43	1950	19.8991
A817	F	11		147	38.6	1950	17.8629
A818	F	11		150	47.8	1950	21.2444
A819	F	11		152	40	1950	17.313
A820	F	11		155	57.4	1950	23.8918
A821	F	11		154	63.7	1950	26.8595
A822	F	11		137	38.1	1950	20.2994
A823	F	11		147	43	1950	19.8991
A824	F	11		147	38.6	1950	17.8629
A825	F	11		150	47.8	1950	21.2444
A826	F	11		152	40	1950	17.313
A827	F	11		155	57.4	1950	23.8918
A828	F	11		147	44	1950	20.3619
A829	F	11		152	40	1950	17.313
A830	F	11		154	63.7	1950	26.8595
A831	F	11		147	38.6	1950	17.8629
A832	F	11		155	57.4	1950	23.8918
A833	F	11		150	47.8	1950	21.2444
A834	F	11		147	43	1950	19.8991
A835	F	11		137	38.1	1950	20.2994
A836	F	11		138	28	1951.81	14.7028
A837	F	11		149	41	1951.81	18.4676
A838	F	11		146	35	1955	16.3258
A839	F	11		146	35	1955	16.3258
A840	F	11		140	34	1957.7	17.3469
A841	F	11		145	40	1959	18.9774
A842	F	11		145	40	1959	18.9774
A843	F	11		146	43.3	1960	20.3134
A844	F	11		146	33	1960	15.4813
A845	F	11		147	38	1960	17.5853
A846	F	11		152	42	1960	18.1787
A847	F	11		146	43.3	1960	20.3134
A848	F	11		146	33	1960	15.4813
A849	F	11		147	38	1960	17.5853
A850	F	11		152	42	1960	18.1787
A851	F	11		146	43.3	1960	20.3134
A852	F	11		152	42	1960	18.1787
A853	F	11		147	38	1960	17.5853
A854	F	11		146	33	1960	15.4813
A855	F	11		150	37	1960	16.4444
A856	F	11		156	50	1960	20.5457
A857	F	11		143	31	1963.64	15.1597
A858	F	11		151	36	1963.64	15.7888
A859	F	11		139	35	1963.64	18.115
A860	F	11		145	39	1965	18.5493
A861	F	11		159	47	1965	18.591
A862	F	11		145	39	1965	18.5493
A863	F	11		159	47	1965	18.591
A864	F	11		145	39	1965	18.5493
A865	F	11		159	47	1965	18.591
A866	F	11		152	39	1968	16.8802
A867	F	11		152	39	1968	16.8802
A868	F	11		152	39	1968	16.8802
A869	F	11		133	30	1970	16.9597
A870	F	11		133	30	1970	16.9597
A871	F	11		133	30	1970	16.9597
A872	F	11		141	33.2	1971	16.6994
A873	F	11		148	37.2	1971	16.9832
A874	F	11		154	47	1971	19.8178
A875	F	11		162	39.5	1971	15.0511
A876	F	11		141	33.2	1971	16.6994
A877	F	11		148	37.2	1971	16.9832
A878	F	11		154	47	1971	19.8178
A879	F	11		162	39.5	1971	15.0511
A880	F	11		162	39.5	1971	15.0511
A881	F	11		154	47	1971	19.8178
A882	F	11		148	37.2	1971	16.9832
A883	F	11		141	33.2	1971	16.6994
A884	F	11		147	33	1975.61	15.2714
A885	F	11		148	36	1976	16.4354
A886	F	11		148	36	1976	16.4354
A887	F	11		148	36	1976	16.4354
A888	F	11		141	36.8	1980	18.5101
A889	F	11		141	36.8	1980	18.5101
A890	F	11		142.5	34.5	1980	16.9898
A891	F	11		141	36.8	1980	18.5101
A892	F	11		158	45	1981	18.026
A893	F	11		158	45	1981	18.026
A894	F	11		158	45	1981	18.026
A895	F	11		146	38	1984	17.827
A896	F	11		146	38	1984	17.827
A897	F	11		146	38	1984	17.827
A898	F	11		139	32	1990	16.7176
A899	F	11		139	32	1990	16.7176
A900	F	11		147	36	1992	16.6597
A901	F	11		147	36	1992	16.6597
A902	F	11		147	36	1992	16.6597
A903	F	11		165	45	1993.85	16.5289
A904	F	11		147	37	1993.85	17.1225
A905	F	11		149	47.8	1998	21.5306
A906	F	11		155	47	1998	19.563
A907	F	11		157	39.2	1998	15.9033
A908	F	11		149	47.8	1998	21.5306
A909	F	11		155	47	1998	19.563
A910	F	11		157	39.2	1998	15.9033
A911	F	11		155	47	1998	19.563
A912	F	11		157	39.2	1998	15.9033
A913	F	11		149	47.8	1998	21.5306
A914	F	11		144	34	2000	16.3966
A915	F	11		153	40	2000	17.0874
A916	F	11		155	54	2000	22.4766
A917	F	11		163	65	2000	24.4646
A918	F	11		150	34.5	2000	15.3333
A919	F	11		144	34	2000	16.3966
A920	F	11		153	40	2000	17.0874
A921	F	11		155	54	2000	22.4766
A922	F	11		163	65	2000	24.4646
A923	F	11		150	34.5	2000	15.3333
A924	F	11		150	35	2000	15.5556
A925	F	11		146	38	2000	17.827
A926	F	11		150	34.5	2000	15.3333
A927	F	11		152	45	2000	19.4771
A928	F	11		156	45.3	2007	18.6144
A929	F	11		156	45.3	2007	18.6144
A930	F	11		156	45.3	2007	18.6144
A931	F	11		136	40	2010	21.6263
A932	F	11		155	38	2010	15.8169
A933	F	11		136	40	2010	21.6263
A934	F	11		155	38	2010	15.8169
A935	F	11		155	38	2010	15.8169
A936	F	11		136	40	2010	21.6263
A937	F	11		156	44.5	2013	18.2857
A938	F	11		156	44.5	2013	18.2857
A939	F	11		156	44.5	2013	18.2857
A940	F	11		159.5	55.4	2014	21.7765
A941	F	11		159.5	55.4	2014	21.7765
A942	F	11		159.5	55.4	2014	21.7765
A943	F	11		143	36	2020	17.507
A944	F	11		143	32.8	2020	16.0399
A945	F	11		143	36	2020	17.507
A946	F	11		143	32.8	2020	16.0399
A947	F	11		143	32.8	2020	16.0399
A948	F	11		149	33.5	2025	15.0894
A949	F	11		149	33.5	2025	15.0894
A950	F	11		153	41	2025	17.5146
A951	F	11		149	33.5	2025	15.0894
A952	F	11		156	41	2030	16.8475
A953	F	11		145	31.5	2037.74	14.9822
A954	F	11		153	41.5	2039	17.7282
A955	F	11		153	41.5	2039	17.7282
A956	F	11		153	41.5	2039	17.7282
A957	F	11		157	42	2040	16.9175
A958	F	11		157	42	2040	16.9175
A959	F	11		152.5	42	2040	18.0597
A960	F	11		155	40	2050	16.6493
A961	F	11		141.5	38.55	2050	19.2536
A962	F	11		157	57	2050	23.1247
A963	F	11		155	40	2050	16.6493
A964	F	11		141.5	38.55	2050	19.2536
A965	F	11		157	57	2050	23.1247
A966	F	11		141.5	38.55	2050	19.2536
A967	F	11		157	57	2050	23.1247
A968	F	11		147	38	2050.63	17.5853
A969	F	11		145	36.9	2052	17.5505
A970	F	11		148	36.8	2052	16.8006
A971	F	11		145	36.9	2052	17.5505
A972	F	11		148	36.8	2052	16.8006
A973	F	11		151	39	2052	17.1045
A974	F	11		148	36.8	2052	16.8006
A975	F	11		145	36.9	2052	17.5505
A976	F	11		154	48.7	2057	20.5347
A977	F	11		154	48.7	2057	20.5347
A978	F	11		154	48.7	2057	20.5347
A979	F	11		154	38	2057.14	16.0229
A980	F	11		151	40	2058	17.6308
A981	F	11		151	40	2058	17.6308
A982	F	11		149	40	2064	18.0172
A983	F	11		149	40	2064	18.0172
A984	F	11		149	40	2064	18.0172
A985	F	11		165	40	2065	14.6924
A986	F	11		165	40	2065	14.6924
A987	F	11		146	43	2068	20.1726
A988	F	11		146	43	2068	20.1726
A989	F	11		146	43	2068	20.1726
A990	F	11		150	38	2070.29	16.8889
A991	F	11		146	46	2076	21.58
A992	F	11		166	46	2076.92	16.6933
A993	F	11		149	39	2076.92	17.5668
A994	F	11		144	34.2	2077	16.4931
A995	F	11		144	34.2	2077	16.4931
A996	F	11		144	34.2	2077	16.4931
A997	F	11		152	40	2080	17.313
A998	F	11		141	30.5	2083.6	15.3413
A999	F	11		148	41.5	2090.32	18.9463
A1000	F	11		157	40	2099	16.2278
A1001	F	11		157	40	2099	16.2278
A1002	F	11		157	40	2099	16.2278
A1003	F	11		140	38	2100	19.3878
A1004	F	11		159	47	2100	18.591
A1005	F	11		140	38	2100	19.3878
A1006	F	11		159	47	2100	18.591
A1007	F	11		159	47	2100	18.591
A1008	F	11		140	38	2100	19.3878
A1009	F	11		143	32	2105	15.6487
A1010	F	11		143	32	2105	15.6487
A1011	F	11		143	32	2105	15.6487
A1012	F	11		142	30	2106	14.878
A1013	F	11		142	30	2106	14.878
A1014	F	11		135	30	2108	16.4609
A1015	F	11		135	30	2108	16.4609
A1016	F	11		135	30	2108	16.4609
A1017	F	11		147.5	34.5	2110	15.8575
A1018	F	11		147.5	34.5	2110	15.8575
A1019	F	11		147.5	34.5	2110	15.8575
A1020	F	11		144	44	2110.75	21.2191
A1021	F	11		140	35	2117	17.8571
A1022	F	11		161	43	2117.65	16.5889
A1023	F	11		159	48	2117.65	18.9866
A1024	F	11		142	29	2120	14.3821
A1025	F	11		142	29	2120	14.3821
A1026	F	11		145	29	2122	13.7931
A1027	F	11		145	29	2122	13.7931
A1028	F	11		146	38	2124.59	17.827
A1029	F	11		150.5	39.4	2128	17.395
A1030	F	11		154	39	2150	16.4446
A1031	F	11		152	45.7	2150	19.7801
A1032	F	11		154	39	2150	16.4446
A1033	F	11		152	45.7	2150	19.7801
A1034	F	11		152	45.7	2150	19.7801
A1035	F	11		143	36	2160	17.6048
A1036	F	11		143	36	2160	17.6048
A1037	F	11		153	50	2160	21.3593
A1038	F	11		143	36	2160	17.6048
A1039	F	11		154	47	2160	19.8178
A1040	F	11		147	31	2170	14.3459
A1041	F	11		154	38	2180	16.0229
A1042	F	11		154	38	2180	16.0229
A1043	F	11		154	38	2180	16.0229
A1044	F	11		149	40	2181.82	18.0172
A1045	F	11		155	34	2189.19	14.1519
A1046	F	11		150	35	2189.19	15.5556
A1047	F	11		161	40.45	2190	15.6051
A1048	F	11		161	40.45	2190	15.6051
A1049	F	11		161	40.45	2190	15.6051
A1050	F	11		144	35	2196.61	16.8789
A1051	F	11		145	39	2204.08	18.5493
A1052	F	11		160	45	2210	17.5781
A1053	F	11		142	27	2210	13.3902
A1054	F	11		160	45	2210	17.5781
A1055	F	11		160	45	2210	17.5781
A1056	F	11		144	35	2213	16.8789
A1057	F	11		145	37	2214	17.5981
A1058	F	11		153	46	2214	19.6506
A1059	F	11		145	37	2214	17.5981
A1060	F	11		153	46	2214	19.6506
A1061	F	11		145	37	2214	17.5981
A1062	F	11		153	46	2214	19.6506
A1063	F	11		144.5	30.1	2215	14.4155
A1064	F	11		144.5	30.1	2215	14.4155
A1065	F	11		153	40	2220	17.0874
A1066	F	11		153	40	2220	17.0874
A1067	F	11		153	40	2220	17.0874
A1068	F	11		151	40.2	2224	17.6308
A1069	F	11		151	40.2	2224	17.6308
A1070	F	11		151	40.2	2224	17.6308
A1071	F	11		159	41	2226.8	16.2177
A1072	F	11		154	44.7	2231	18.848
A1073	F	11		154	44.7	2231	18.848
A1074	F	11		154	44.7	2231	18.848
A1075	F	11		153	42	2240	17.9418
A1076	F	11		159	51	2242.21	20.1733
A1077	F	11		145	33	2268	15.6956
A1078	F	11		153	39	2268	16.6603
A1079	F	11		145	33	2268	15.6956
A1080	F	11		153	39	2268	16.6603
A1081	F	11		145	33	2268	15.6956
A1082	F	11		153	39	2268	16.6603
A1083	F	11		163	43	2273.68	16.1843
A1084	F	11		159	44	2273.68	17.4044
A1085	F	11		143.5	39.51	2280	19.1868
A1086	F	11		154	41.2	2295	17.3722
A1087	F	11		154	41.2	2295	17.3722
A1088	F	11		154	41.2	2295	17.3722
A1089	F	11		150	46	2306.05	20.4444
A1090	F	11		142	42	2322	20.8292
A1091	F	11		145	36	2322	17.1225
A1092	F	11		142	42	2322	20.8292
A1093	F	11		145	36	2322	17.1225
A1094	F	11		145	36	2322	17.1225
A1095	F	11		142	42	2322	20.8292
A1096	F	11		160	49	2360	19.1406
A1097	F	11		160	49	2360	19.1406
A1098	F	11		160	49	2360	19.1406
A1099	F	11		157	41	2370	16.6335
A1100	F	11		157	41	2370	16.6335
A1101	F	11		159	44	2390	17.4044
A1102	F	11		159	44	2390	17.4044
A1103	F	11		159	44	2390	17.4044
A1104	F	11		156	38	2393	15.6147
A1105	F	11		156	38	2393	15.6147
A1106	F	11		156	38	2393	15.6147
A1107	F	11		145	35	2400	16.6468
A1108	F	11		146	39	2400	18.2961
A1109	F	11		162	51	2400	19.433
A1110	F	11		145	35	2400	16.6468
A1111	F	11		146	39	2400	18.2961
A1112	F	11		162	51	2400	19.433
A1113	F	11		147	36	2400	16.6597
A1114	F	11		164	42	2400	15.6157
A1115	F	11		159	44	2400	17.4044
A1116	F	11		141	30	2400	15.0898
A1117	F	11		156	38	2400	15.6147
A1118	F	11		156	46	2417.91	18.902
A1119	F	11		153	40	2461	17.0874
A1120	F	11		153	40	2461	17.0874
A1121	F	11		153	40	2461	17.0874
A1122	F	11		149	35	2560	15.7651
A1123	F	11		155	36.6	2565	15.2341
A1124	F	11		155	36.6	2565	15.2341
A1125	F	11		155	36.6	2565	15.2341
A1126	F	11		157	42.5	2571.43	17.2421
A1127	F	11		154	34	2854.63	14.3363

[truncated: 7 more sheets: regressione f11, f12, regressione f12, f13, regressionef13, f14, regressione f14]
